# Supplementary material for: TNFSF8 Drives Oral Squamous Cell Carcinoma Progression via CD8+ T Cell Regulation: Insights from Multi-Omics Integration and Single-Cell eQTL Analysis
Source: Research Square preprint supplement (doi:10.21203/rs.3.rs-7101139/v1), 2025-08-11
Supplement: Supplementary file 2 [file 2c51acaba9c8a130a7d43cfc.xlsx]

## Sheet: Sheet1
Table S6 Mendelian Randomization Analysis of Immune Cell Traits Associated with OSCC
id	nsnp	method	beta	se	OR	OR_lci95	OR_uci95	pvalue
ebi-a-GCST90001475	16	Inverse variance weighted	-0.226302	0.0808979	0.797477	0.680544	0.934501	0.00515185
ebi-a-GCST90001476	8	Inverse variance weighted	-0.220433	0.0945066	0.802171	0.666533	0.965412	0.0196762
ebi-a-GCST90001480	11	Inverse variance weighted	0.11743	0.0558319	1.1246	1.00803	1.25466	0.0354408
ebi-a-GCST90001483	79	Inverse variance weighted	0.0581635	0.024094	1.05989	1.011	1.11114	0.0157773
ebi-a-GCST90001500	7	Inverse variance weighted	0.112073	0.0557725	1.11859	1.00276	1.24781	0.0444876
ebi-a-GCST90001505	3	Inverse variance weighted	0.359708	0.172464	1.43291	1.02192	2.0092	0.0370059
ebi-a-GCST90001544	11	Inverse variance weighted	-0.525213	0.166852	0.591429	0.426457	0.82022	0.00164517
ebi-a-GCST90001546	12	Inverse variance weighted	-0.307276	0.142494	0.735447	0.556235	0.9724	0.0310511
ebi-a-GCST90001592	6	Inverse variance weighted	0.731937	0.190579	2.0791	1.43104	3.02065	0.000122732
ebi-a-GCST90001607	3	Inverse variance weighted	0.976995	0.190898	2.65646	1.82729	3.86189	3.09E-07
ebi-a-GCST90001684	4	Inverse variance weighted	0.818564	0.134013	2.26724	1.74351	2.9483	1.01E-09
ebi-a-GCST90001686	5	Inverse variance weighted	0.524731	0.227376	1.69	1.08228	2.63897	0.0210121
ebi-a-GCST90001687	7	Inverse variance weighted	0.715241	0.147376	2.04468	1.53171	2.72945	1.22E-06
ebi-a-GCST90001690	4	Inverse variance weighted	1.00772	0.298573	2.73934	1.52579	4.91809	0.000737853
ebi-a-GCST90001692	14	Inverse variance weighted	-0.21276	0.086471	0.80835	0.682329	0.957647	0.0138754
ebi-a-GCST90001701	7	Inverse variance weighted	-0.354937	0.111533	0.701217	0.563526	0.872552	0.00146078
ebi-a-GCST90001713	11	Inverse variance weighted	-0.24228	0.0962112	0.784836	0.649954	0.94771	0.0117951
ebi-a-GCST90001775	13	Inverse variance weighted	0.198803	0.077664	1.21994	1.04768	1.42052	0.0104736
ebi-a-GCST90001777	13	Inverse variance weighted	0.161698	0.062142	1.17551	1.04071	1.32776	0.00926628
ebi-a-GCST90001778	12	Inverse variance weighted	0.185054	0.0724544	1.20328	1.04398	1.38689	0.0106469
ebi-a-GCST90001779	13	Inverse variance weighted	0.19942	0.0719709	1.22069	1.06009	1.40563	0.00559109
ebi-a-GCST90001780	10	Inverse variance weighted	0.283981	0.0939058	1.32841	1.10509	1.59686	0.00249372
ebi-a-GCST90001782	9	Inverse variance weighted	0.171509	0.0717896	1.18709	1.03128	1.36645	0.0168923
ebi-a-GCST90001784	11	Inverse variance weighted	0.20689	0.0893569	1.22985	1.03226	1.46525	0.0205956
ebi-a-GCST90001789	13	Inverse variance weighted	0.148618	0.0608746	1.16023	1.02974	1.30726	0.0146315
ebi-a-GCST90001790	12	Inverse variance weighted	0.17833	0.0629931	1.19522	1.0564	1.35229	0.00464114
ebi-a-GCST90001791	12	Inverse variance weighted	0.198437	0.0750946	1.2195	1.05259	1.41287	0.00822973
ebi-a-GCST90001792	12	Inverse variance weighted	0.149929	0.0650328	1.16175	1.02272	1.31968	0.0211425
ebi-a-GCST90001794	10	Inverse variance weighted	0.24833	0.10167	1.28188	1.05028	1.56456	0.0145854
ebi-a-GCST90001798	34	Inverse variance weighted	-0.110953	0.0456013	0.894981	0.81846	0.978657	0.0149699
ebi-a-GCST90001808	33	Inverse variance weighted	-0.0916771	0.0450692	0.9124	0.83526	0.996664	0.0419374
ebi-a-GCST90001830	3	Inverse variance weighted	-0.387385	0.175681	0.67883	0.481081	0.957864	0.027451
ebi-a-GCST90001838	37	Inverse variance weighted	-0.0884617	0.0389122	0.915338	0.848123	0.98788	0.0230041
ebi-a-GCST90001841	24	Inverse variance weighted	-0.114351	0.0505262	0.891945	0.807847	0.984797	0.0236228
ebi-a-GCST90001887	8	Inverse variance weighted	-0.223718	0.108507	0.799541	0.646365	0.989016	0.0392282
ebi-a-GCST90001889	6	Inverse variance weighted	-0.276753	0.116742	0.758242	0.603163	0.953193	0.0177579
ebi-a-GCST90001891	7	Inverse variance weighted	-0.225609	0.0998824	0.79803	0.656142	0.970601	0.0238993
ebi-a-GCST90001893	7	Inverse variance weighted	-0.280647	0.126832	0.755295	0.589054	0.968453	0.0269156
ebi-a-GCST90001899	3	Inverse variance weighted	-0.325572	0.146189	0.722114	0.54221	0.96171	0.0259429
ebi-a-GCST90001900	9	Inverse variance weighted	-0.161808	0.0797597	0.850605	0.727503	0.994536	0.0424901
ebi-a-GCST90001902	4	Inverse variance weighted	-0.297827	0.136123	0.74243	0.568572	0.96945	0.0286746
ebi-a-GCST90001932	11	Inverse variance weighted	0.391917	0.162577	1.47982	1.07602	2.03515	0.0159241
ebi-a-GCST90001963	5	Inverse variance weighted	-0.300876	0.112288	0.740169	0.593949	0.922386	0.00737326
ebi-a-GCST90001973	6	Inverse variance weighted	-0.656929	0.22639	0.518441	0.332654	0.807991	0.00371075
ebi-a-GCST90002081	9	Inverse variance weighted	-0.472964	0.202429	0.623152	0.419067	0.926627	0.0194679
ebi-a-GCST90002109	22	Inverse variance weighted	-0.170069	0.0483899	0.843606	0.767272	0.927535	0.000440485
ebi-a-GCST90002121	13	Inverse variance weighted	0.209175	0.0930969	1.23266	1.02707	1.47941	0.0246493
