# Supplementary material for: TNFSF8 Drives Oral Squamous Cell Carcinoma Progression via CD8+ T Cell Regulation: Insights from Multi-Omics Integration and Single-Cell eQTL Analysis
Source: Research Square preprint supplement (doi:10.21203/rs.3.rs-7101139/v1), 2025-08-11
Supplement: Supplementary file 3 [file 382d2b3d1a83e81679c55406.xlsx]

## Sheet: Sheet1
Table S4 Colocalization Analysis of deCODE cis-pQTL and OSCC: Preliminary Results
id	nsnps	topsnp	colorsnp	PP.H0.abf	PP.H1.abf	PP.H2.abf	PP.H3.abf	PP.H4.abf
3421_54_TNFSF8_CD30_Ligand	8	rs1006026	rs1006026	6.26604718801478e-57	0.212583069167575	2.69949693219713e-59	0.000128547910415446	0.787288382922021
3009_3_TGFBR3_TGF_b_R_III	8	rs59178722	rs59178722	8.3277824630994e-21	0.270774790046535	3.34819869106557e-23	0.000359789093862117	0.728865420859606
4158_54_PLAU_uPA	28	rs2227551	rs2227551	7.90514099135216e-206	0.486182646055812	2.41535456433527e-208	0.000972648690165672	0.512844705254019
8841_65_CILP2_CILP2	5	rs2315282	rs2315282	2.78461345573559e-18	0.502398875007021	4.00680284015141e-21	0.000225530212889815	0.497375594780086
19277_4_TSTD1_KAT	17	rs10908821	rs10908821	6.82573406428708e-290	0.617548726226827	1.42916130257704e-292	0.000911473865240219	0.381539799907891
19448_104_UPP1_UPP1	4	rs6950051	rs6950051	1.23155160553012e-18	0.678309004792938	8.43838734635659e-22	0.000143218303320773	0.321547776903743
16913_8_RNASET2_RNT2	52	rs13216122	rs13216122	0	0.699390263644123	0	0.00343203021074883	0.297177706145055
12558_3_UBASH3B_UBS3B	4	rs11218734	rs11218734	1.19951910086789e-42	0.736788504174982	6.00706289548481e-46	0.000105870148201811	0.263105625676817
14091_42_CBR3_Carbonyl_reductase_3	43	rs11911678	rs11911678	0	0.743872257827036	0	0.00460638030238475	0.251521361870467
18222_34_SH3GLB2_SHLB2	34	rs62585602	rs62585602	0	0.75035830504349	0	0.00256041284880204	0.24708128210781
15305_7_SCGN_Secretagogin	4	rs2064125	rs2064125	9.55349839020491e-12	0.762010862482749	5.41181780659682e-15	0.000193864815158896	0.237795272692532
17692_2_BTN3A3_BT3A3	52	rs9295661	rs13210340	0	0.776665908421547	0	0.00599723273545014	0.217336858843141
15447_45_SORD_Sorbitol_dehydrogenase	30	rs72722045	rs72722045	1.54154531073711e-145	0.782653505324872	5.7272484994338e-148	0.00269311136595105	0.214653383309188
15480_2_VNN2_VNN2	104	rs12205095	rs12205095	0	0.780346523650229	0	0.00652667165127311	0.21312680469872
6626_81_CHST12_CHSTC	11	rs6952433	rs6952433	8.02211555681672e-89	0.788344893878216	8.71754290211438e-92	0.00064567611451924	0.211009430007268
10815_2_HABP4_HABP4	33	rs10820606	rs11789820	3.89838009554983e-67	0.808424966613795	1.01143645580185e-69	0.00190779494578057	0.189667238440414
9015_1_PRG3_PRG3	3	rs61886960	rs61886960	2.20647711248168e-16	0.822584126115592	7.77437033757303e-20	0.000112528513480249	0.177303345370929
9005_16_PLXNA1_PLXA1	20	rs4679138	rs4679138	5.33328948178048e-175	0.830200940060207	1.05424540321327e-177	0.00147275379609293	0.168326306143724
16773_29_SCUBE3_SCUB3	18	rs3800403	rs3800403	5.93786076374632e-115	0.836479811177901	8.53040715480296e-118	0.00103921668464938	0.162480972137478
2658_27_NTRK3_TrkC	24	rs28735437	rs28735437	4.19231019785248e-66	0.83610206325176	8.55752419927194e-69	0.00154433395171777	0.16235360279653
12436_84_GSTO1_GST_omega_1	107	rs2995266	rs966645	0	0.829035590128901	0	0.0135556239171013	0.157408785954222
18831_6_LRIG1_LRIG1	115	rs1678101	rs782726	0	0.838270391700411	0	0.00767313582928998	0.154056472470215
14271_23_RAB6B_RAB6B	11	rs10212397	rs10212397	1.46729723816749e-127	0.864131431977657	1.09909819645284e-130	0.000511932320945879	0.135356635701384
14151_4_ISG15_UCRP	28	rs1921	rs1921	0	0.863568259300833	0	0.00168785526294667	0.134743885436196
12727_7_PTGFRN_FPRP	104	rs12023342	rs78129322	0	0.859465071263288	0	0.00657630592144728	0.133958622815274
9901_28_EGLN1_EGLN1	36	rs114459700	rs114459700	4.74946539942841e-92	0.869370949897698	1.12690691222546e-94	0.0019340637671988	0.128694986335111
17329_2_BDH2_BDH2	14	rs2711897	rs2711897	6.35285329168399e-131	0.87254083736022	1.08009942454324e-133	0.00135737471161088	0.126101787928158
6385_63_VWA1_VWA1	40	rs115503338	rs115503338	0	0.876065798149209	0	0.00196937634155609	0.121964825509332
15333_11_SDF2_SDF2	22	rs704	rs704	1.47004425646353e-186	0.877947768570458	3.56950604615052e-189	0.00201175920274059	0.120040472226786
11424_4_FAH_FAAA	50	rs11555096	rs11555096	0	0.872666401489798	0	0.0101606358310502	0.117172962679369
3339_33_THBS2_TSP2	97	rs58955525	rs58955525	0	0.87607756692114	0	0.00743508310534002	0.116487349973463
5620_13_PAM_AMD	84	rs1116046	rs34596924	0	0.878237748263409	0	0.00610094133979288	0.11566131039672
19482_11_HDHD3_HDHD3	4	rs1043836	rs1043836	8.32883529206049e-93	0.88948257178304	2.50933391873947e-96	0.000157625901475596	0.110359802315472
5737_61_SEMA4D_SEM4D	72	rs28642754	rs118116288	0	0.885805955324773	0	0.00599566966184242	0.108198375013382
14133_93_IL1R2_IL_1_sRII	69	rs200669380	rs78423067	1.56348086039222e-182	0.885905091838076	1.1648354696095e-184	0.0064926299332604	0.107602278228684
12411_60_MAX_MAX	13	rs8181938	rs8181938	1.23852740371544e-99	0.891322704245844	2.3947231518279e-102	0.00161633337609534	0.107060962378063
12396_19_HIBCH_HIBCH	51	rs2582770	rs2582770	0	0.893979938743971	0	0.00343086819055014	0.102589193065576
6544_33_NELL1_NELL1	92	rs117924866	rs117924866	0	0.893887671961804	0	0.0070506603240237	0.0990616677141682
17140_57_PDGFD_PDGFD	53	rs7115797	rs7115797	0	0.898323324985816	0	0.00346986433161052	0.0982068106826298
6375_75_XXYLT1_XXLT1	33	rs12695049	rs12695049	7.49932827271063e-120	0.903665110271006	1.58288664098419e-122	0.00181284803060079	0.0945220416983826
4920_10_LYZ_Lysozyme	100	rs6581886	rs6581886	0	0.898705505814539	0	0.00812585702460753	0.0931686371607405
6433_57_FAM20A_FA20A	12	rs12941038	rs12941038	8.39624586003555e-51	0.906240793843637	7.00187596442823e-54	0.000662644246324389	0.0930965619100355
15316_262_TXNL4B_TXN4B	12	rs116891509	rs116891509	1.72078598959776e-53	0.906573894731069	1.44237200707698e-56	0.000667136111352997	0.0927589691575726
19293_6_VPS26A_VP26A	7	rs10998638	rs10998638	1.77694289569638e-77	0.907074169903412	6.63718319154308e-81	0.000246127889671613	0.0926797022069252
9748_31_GSTM3_GSTM3_3	123	rs11101981	rs11101981	0	0.898432942374046	0	0.00925791530657322	0.0923091423193715
11288_26_NT5C2_5NTC	10	rs4919682	rs4919682	1.51169926691674e-34	0.907103940327455	1.6318490155714e-37	0.00088719162800614	0.0920088680445371
9329_28_TREML1_TRML1	7	rs144384520	rs144384520	2.44016178501788e-38	0.909789030947377	1.39705062948572e-41	0.00043109597465806	0.0897798730779665
13405_61_SPINK2_ISK2	45	rs11941268	rs11941268	6.7744754289117e-213	0.907946572422038	1.86714700720093e-215	0.00241279626315128	0.0896406313148095
2474_54_APCS_SAP	17	rs146174215	rs146174215	9.1811466171583e-107	0.909540632508191	1.27657660545423e-109	0.00117537099877744	0.0892839964930402
17331_138_KREMEN1_KREM1	19	rs2205771	rs2205771	2.30742433016075e-84	0.910659895677248	3.88789295136462e-87	0.00144652214848037	0.0878935821742774
11187_11_CLEC12A_CL12A	161	rs12297153	rs12297153	0	0.9002178709335	0	0.01219943587576	0.0875826931906067
19372_7_MDGA2_MDGA2	85	rs75705866	rs17119861	0	0.912595393936837	0	0.00582791257167323	0.0815766934914495
11212_7_TXNDC5_TXND5	20	rs149742777	rs149742777	1.31759994781551e-52	0.917721333130129	1.96913755544926e-55	0.00129053555878891	0.0809881313110773
16919_1_DBI_ACBP	22	rs78115599	rs79158537	2.16148076631646e-67	0.918691112639463	4.11200639389263e-70	0.00166807945315405	0.0796408079073735
7173_141_TMEM132C_T132C	44	rs117965239	rs117965239	2.66545025166615e-181	0.918035383121688	1.54648535888114e-183	0.00524969579712743	0.0767149210811608
18206_18_ADH6_ADH6	14	rs28730617	rs28730617	1.12728524886377e-71	0.924344690646069	1.93634189540808e-74	0.00151360847335437	0.0741417008805825
11369_23_ADH5_ADHX	14	rs28894371	rs28894371	2.84306420473702e-70	0.924379521051233	4.82451070507396e-73	0.00149449103009736	0.0741259879186715
5742_14_ACP6_PPA6	83	rs79565532	rs613089	0	0.918025177060651	0	0.00822496176441267	0.0737498611750103
11109_56_SVEP1_SVEP1	78	rs61751937	rs61751937	4.3726316278239e-221	0.921027945157003	2.82881220176492e-223	0.00588537337459456	0.0730866814684045
11178_21_SVEP1_SVEP1	81	rs61751937	rs61751937	5.09174719280195e-258	0.920455013711882	3.63814133075988e-260	0.00650376886699158	0.0730412174211376
15644_1_BTD_Biotinidase	70	rs13100619	rs13100619	0	0.921674672899983	0	0.00545327034070375	0.0728720567593944
2700_56_PROS1_Protein_S	3	rs6809958	rs6809958	3.45887697608115e-09	0.927167479052741	1.50427623905451e-12	0.000330726198029033	0.0725017912888482
7009_8_CD72_CD72	6	rs34791102	rs34791102	2.80232119078857e-40	0.929804805072702	2.07202793658571e-43	0.000617917624428988	0.069577277302868
3054_3_HP_Haptoglobin__Mixed_Type	76	rs4788808	rs74386648	0	0.924257911456172	0	0.00622674484649678	0.0695153436973664
2190_55_F11_Coagulation_Factor_XI	40	rs4253417	rs4253417	0	0.928359816141114	0	0.00228905246613834	0.0693511313926841
2844_53_TIE1_sTie_1	25	rs7549876	rs7549876	3.3367046083726e-122	0.929740448924392	6.54222512274726e-125	0.00175442259107601	0.0685051284845373
15495_9_FOLR3_FOLR3	85	rs118032309	rs77313897	0	0.925408549584682	0	0.00643678397790143	0.0681546664376929
5491_12_SPOCK2_Testican_2	12	rs1245548	rs1245548	1.06881121373556e-109	0.931174197374023	1.70552279724653e-112	0.00141848542177489	0.0674073172042043
9267_2_CPA4_CBPA4	181	rs56155312	rs56155312	0	0.919081196065656	0	0.0137521132714448	0.0671666906621104
6367_66_FMOD_fibromodulin	10	rs16851364	rs16851364	7.43372986103405e-48	0.932290098180487	5.1007910472379e-51	0.000572570739447827	0.0671373310800605
16558_2_MYOC_MYOC	50	rs7547721	rs7547721	2.2241178808405e-230	0.929852339688408	9.08430027347543e-233	0.0037315200827065	0.0664161402288978
13748_4_CCL8_MCP_2	159	rs2079662	rs80219280	0	0.922715480050624	0	0.011828887613727	0.0654556323356889
4908_6_ENG_Endoglin	17	rs11794565	rs11794565	2.31567215527844e-98	0.934351985207232	3.31624980913113e-101	0.00127370136604359	0.0643743134267278
6382_17_MANBA_MANBA	53	rs227275	rs227275	0	0.931508411385309	0	0.00494556680883935	0.0635460218059192
6649_51_NTN1_NET1	44	rs9914641	rs9914641	0	0.932179319482373	0	0.00513711250473102	0.0626835680128341
17682_1_CD46_CD46	15	rs10746399	rs10746399	6.35894420019844e-182	0.936419323865467	7.0886610762896e-185	0.000981278170888738	0.0625993979636348
12450_42_PMVK_PMVK	9	rs76977753	rs76977753	6.00637321958982e-18	0.938266281962829	5.33324173536972e-21	0.000772153646887924	0.0609615643902812
15483_377_AGRN_Agrin	27	rs4970394	rs4970394	5.16968194587556e-171	0.937533119388356	1.01006139775755e-173	0.00177107261204582	0.0606958079995883
8244_16_FUT8_FUT8	93	rs34941420	rs1256537	0	0.928022338879718	0	0.0114416767012808	0.0605359844189549
10714_7_ACE_ACE	94	rs6504163	rs6504163	0	0.933604069188311	0	0.00656085059423071	0.0598350802175267
3302_58_CST7_CYTF	90	rs914308	rs2183695	0	0.934458236294792	0	0.00667607289273394	0.0588656908124232
15570_99_CR2_Complement_receptor_type_2	36	rs61240730	rs61240730	3.06481382405598e-87	0.938006855500093	1.05725067016293e-89	0.00317697051168537	0.0588161739882085
7156_2_FUT10_FUT10	95	rs4733407	rs2056176	0	0.933491763393918	0	0.00933528138997903	0.0571729552164422
3033_57_LGALS2_Galectin_2	19	rs5756736	rs5756736	4.65748965093274e-141	0.941608588080516	7.16360673704502e-144	0.00139127224110557	0.0570001396783575
16890_37_ADAMTSL1_ATL1	55	rs702208	rs702208	8.89359248496894e-165	0.939960433423169	3.08906630201114e-167	0.00320799094127071	0.0568315756355543
11656_110_EVL_EVL	14	rs76401008	rs6575764	2.23242521732639e-28	0.943148500161849	2.14453877371724e-31	0.000850017008752007	0.0560014828293974
15573_110_NCAN_CSPG3	9	rs2228603	rs2228603	1.13220418528389e-86	0.943717215956029	8.43351586956049e-90	0.000647316722804078	0.0556354673211592
6947_4_ST3GAL6_SIA10	72	rs113711414	rs72932678	0	0.939835325800608	0	0.00624269075881461	0.0539219834403855
10818_36_SMPD1_ASM	42	rs1050239	rs1050239	0	0.943497904133957	0	0.00287898573638153	0.0536231101296585
17384_110_PFKM_K6PF	13	rs4760682	rs4760682	5.30259920269434e-83	0.945743146361675	1.011312745927e-85	0.00175121752252434	0.052505636115795
8900_28_NEO1_NEO1	13	rs62016793	rs62016793	1.08427089231237e-87	0.950129871562516	1.40292451400437e-90	0.00118067167222354	0.0486894567652485
15544_25_KLK14_kallikrein_14	44	rs34093024	rs34093024	3.40428794485732e-108	0.947590047496145	1.40560672163336e-110	0.00386398717431132	0.0485459653295361
8958_51_CHL1_CHL1	43	rs13077895	rs13077895	1.01125822445559e-148	0.949682969922419	2.66449310996704e-151	0.00245439016636261	0.0478626399112084
3038_9_CXCL11_I_TAC	45	rs10336	rs10336	0	0.94798381758927	0	0.00422292392592803	0.0477932584848105
2789_26_MMP7_MMP_7	35	rs11568819	rs11568819	4.86840689098832e-242	0.950413632207254	1.07319451668894e-244	0.00204755866631082	0.0475388091264549
16900_29_MDGA1_MDGA1	168	rs804830	rs876796	0	0.931659371445496	0	0.0208353955335699	0.0475052330212778
2580_83_MPO_Myeloperoxidase	47	rs34097845	rs34097845	9.15852245449031e-169	0.95005394585809	3.2265017137686e-171	0.00330034688867672	0.0466457072532071
6431_68_PCYOX1_PCYOX	80	rs62152025	rs62152025	0	0.947492654449991	0	0.00608969290520514	0.0464176526449142
14708_59_C8G_CO8G	76	rs10781522	rs10781522	0	0.940521636488823	0	0.0137028773387939	0.0457754861723853
5736_1_TREML2_TRML2	91	rs9381017	rs9381017	0	0.944193060905088	0	0.010497990373867	0.0453089487210575
7049_2_ADAM23_ADAM_23	108	rs1448903	rs1448903	0	0.946971642300978	0	0.00831885154445064	0.0447095061545208
6556_5_ENPP5_ENPP5	129	rs6906620	rs62400504	0	0.942559261103879	0	0.0129713617364662	0.0444693771594286
3858_5_ACP1_PPAC	104	rs113106463	rs75141812	0	0.948987892703936	0	0.00688924434410663	0.0441228629521031
8275_31_PEAR1_PEAR1	23	rs4661012	rs4661012	1.64583084254834e-103	0.954456983126846	2.72910386050311e-106	0.0015386687735819	0.0440043480995611
13427_66_MAN1C1_MA1C1	12	rs11247595	rs11247595	2.88068643557991e-110	0.955413252369753	2.34805630513687e-113	0.00073490841859695	0.043851839211652
12571_14_ARL3_ARL3	10	rs8354	rs8354	3.82189803011292e-65	0.955557732378952	2.93466770156992e-68	0.000689978541021424	0.043752289080037
3184_25_F7_Coagulation_Factor_VII	103	rs503176	rs2026160	0	0.948830682932976	0	0.00868308325061982	0.042486233816446
9484_75_DSG2_Desmoglein_2	28	rs9304098	rs9304098	1.71711765349912e-112	0.955831200285578	3.55246422530041e-115	0.00193524080781546	0.04223355890662
3331_8_RGMB_RGMB	13	rs61048056	rs61048056	5.81736473054309e-60	0.95730511218883	4.31514798991704e-63	0.000668073621650493	0.0420268141895224
13112_179_FSTL1_FSTL1	10	rs1147707	rs1147707	1.0025632636063e-63	0.957629934920601	8.67058282822596e-67	0.000786614626509368	0.0415834504528995
13388_57_PCSK1_NEC1	113	rs76239650	rs77171607	0	0.950568978135074	0	0.00830496102763874	0.0411260608374581
13088_397_BTC_BTC	12	rs28549760	rs28549760	9.43725287263149e-46	0.957981560361324	1.65217604507032e-48	0.0016367527578665	0.0403816868808121
8245_27_ICAM5_sICAM_5	82	rs5030347	rs7258215	0	0.951535499481975	0	0.00839993213755671	0.0400645683803843
5124_69_ICAM5_sICAM_5	87	rs5030347	rs7258215	0	0.949719219046046	0	0.0102926873784236	0.0399880935754553
7871_16_TMEM132A_T132A	75	rs490956	rs490956	0	0.951716144585702	0	0.00856162360263679	0.0397222318117355
4234_8_IL1RL1_IL_1_R4	96	rs4851562	rs72627435	0	0.953235268482627	0	0.00766599724943847	0.039098734267785
13125_45_VTN_Vitronectin	125	rs4239214	rs11653044	0	0.95023012010606	0	0.0109815736260213	0.0387883062672855
13700_10_ANXA2_annexin_II	116	rs3743268	rs67827628	0	0.948888487570766	0	0.0123391089595671	0.0387724034698395
4332_6_CLEC1B_CLC1B	8	rs659928	rs659928	3.38602734426665e-63	0.953117475804316	2.96499316605899e-65	0.00830744967627369	0.0385750745194214
8814_33_PSAPL1_SAPL1	52	rs35791045	rs35791045	0	0.957458333117462	0	0.0040551921162443	0.0384864747662919
12563_2_TNFAIP8_TFIP8	19	rs1035376	rs1035376	3.08403411181263e-85	0.960451557886535	3.70866527577791e-88	0.00111654668543692	0.038431895428038
4961_17_ANXA2_annexin_II	86	rs67827628	rs67827628	0	0.936233110972938	0	0.025511595179702	0.0382552938474329
4407_10_MST1_MSP	41	rs188551769	rs9811027	0	0.958677643915905	0	0.00319710096174154	0.0381252551219695
4989_7_FGG_Fibrinogen_g_chain_dimer	5	rs4220	rs4220	1.38537971655369e-47	0.961652060053971	5.48282983080525e-51	0.000342581605559614	0.0380053583404705
18397_5_AKR1C4_AK1C4	92	rs6601898	rs6601898	0	0.957652938737308	0	0.00623814589809771	0.0361089153645826
7957_2_SCG3_SCG3	58	rs2470193	rs2470193	0	0.958350533942584	0	0.00608146919146584	0.0355679968659168
12524_18_SAT2_SAT2	30	rs858523	rs858523	2.04881753184031e-126	0.95391547042649	2.32709850649568e-128	0.0107995269415962	0.0352850026318974
8428_102_NTM_NTRI	93	rs2511504	rs2511504	0	0.959081999701236	0	0.00618906717251372	0.0347289331262111
4440_15_FCRL3_FCRL3	107	rs703158	rs2317232	0	0.959106385587088	0	0.00786865035129064	0.0330249640616632
5346_24_CPNE1_CPNE1	52	rs58029146	rs3841688	0	0.96215021635873	0	0.0050898799577822	0.0327599036833036
4568_17_SLITRK5_SLIK5	29	rs12877225	rs12877225	7.99725916197045e-41	0.965767312376972	1.5163095549577e-43	0.00179869611690245	0.0324339915061279
5069_9_CD55_DAF	39	rs4844574	rs4844574	0	0.964716697346737	0	0.00289873427393442	0.032384568379426
18215_5_THG1L_THG1	45	rs2270813	rs2270813	0	0.963814698579286	0	0.00396446395993908	0.0322208374607915
4549_78_FUT5_FUT5	131	rs11878862	rs778809	0	0.958077539219894	0	0.0100674424619613	0.0318550183179499
13676_46_INHBB_Inhibin_bB_chain	24	rs17050272	rs17050272	0	0.967016344941549	0	0.00136732889812843	0.031616326160325
3235_50_WFIKKN2_WFKN2	77	rs56087652	rs56087652	0	0.963647113323056	0	0.00575629043663076	0.0305965962404266
3799_11_CA3_Carbonic_anhydrase_III	25	rs2072696	rs2072696	4.45179038946863e-90	0.966216747598118	1.48323232823865e-92	0.00318861334412453	0.0305946390577436
7808_5_GLCE_GLCE	87	rs11072069	rs11072069	0	0.962032147785216	0	0.00784450903160647	0.0301233431831108
5649_83_PSG4_PSG4	88	rs62112893	rs2007528	0	0.963250042731968	0	0.00700156049244003	0.0297483967754813
18930_28_SLIT2_SLIT2	7	rs677198	rs677198	2.33052204399035e-25	0.970118980701871	8.21272063957079e-29	0.000312299583835753	0.0295687197142932
5644_60_RNASE4_RNAS4	42	rs12588573	rs12588573	6.72452621445748e-278	0.968153073928917	1.98201887019171e-280	0.00282455809340215	0.029022367977655
12859_33_ECI2_PECI	45	rs7756630	rs7756630	0	0.968185240865677	0	0.00328530255984099	0.0285294565744736
17680_12_EPHB1_EPHB1	42	rs185257	rs185257	9.07490022930562e-260	0.967630133740587	3.80587833130718e-262	0.00402975691174223	0.0283401093476673
3320_49_IGFBP7_IGFBP_7	55	rs1718860	rs1718860	7.13996925468584e-229	0.968168733505064	2.73657703657508e-231	0.00368260726861041	0.0281486592263474
16060_99_NID2_NID2	95	rs1253678	rs6572807	0	0.963621138098879	0	0.00903938828934226	0.0273394736118014
5105_2_RTN4R_Nogo_Receptor	57	rs75765	rs75765	1.15769581732407e-196	0.967913326324267	5.8959499151155e-199	0.00490223519730453	0.0271844384784135
5353_89_IL1RN_IL_1Ra	18	rs55709272	rs55709272	1.53516230963389e-104	0.972237694604003	2.23377753350539e-107	0.00138830554628337	0.0263739998497264
8794_13_DPEP1_DPEP1	94	rs12447525	rs258337	0	0.96388657632468	0	0.0100759041946506	0.0260375194806863
3607_71_DKK3_DKK3	47	rs11022114	rs11022114	0	0.971402345417886	0	0.0036667195942718	0.0249309349879322
8923_94_GALNT16_GLTL1	37	rs12100668	rs12100668	6.11823614695223e-84	0.970569797329732	3.04212679864556e-86	0.00480126584640313	0.024628936823869
3894_15_NAGK_NAGK	24	rs11680831	rs11680831	2.27060542481446e-89	0.973529692952594	4.41894827575657e-92	0.00187003862879192	0.0246002684186179
15686_49_INHBC_INHBC	109	rs74808980	rs3923885	0	0.96732754203949	0	0.00820924348526223	0.0244632144748457
7905_30_HP_HPT	78	rs9932707	rs9932707	0	0.968991202984843	0	0.00676485045564512	0.0242439465595025
6207_10_PSAP_prosaposin	47	rs1867981	rs1867981	4.64142245643669e-237	0.972607765189815	1.72948476251711e-239	0.00360033481026944	0.0237918999999492
3212_30_ASAH2_ASAH2	85	rs114001906	rs4935128	0	0.965288511322988	0	0.011297373542236	0.0234141151348123
3309_2_FCGR2A_FCG2A	170	rs114844178	rs6658353	0	0.963144522031224	0	0.0136649966601223	0.0231904813084707
8465_52_CTSH_Cathepsin_H	152	rs112348856	rs112348856	0	0.959380734060394	0	0.0176515893378431	0.02296767660185
