# Supplementary material for: TNFSF8 Drives Oral Squamous Cell Carcinoma Progression via CD8+ T Cell Regulation: Insights from Multi-Omics Integration and Single-Cell eQTL Analysis
Source: Research Square preprint supplement (doi:10.21203/rs.3.rs-7101139/v1), 2025-08-11
Supplement: Supplementary file 4 [file 3f762b60ce0a7c1561e8683f.xlsx]

## Sheet: Sheet1
Table S8 Differentially Expressed Genes in T-Cells Identified by Single-Cell Analysis
id	p_val	avg_log2FC	pct.1	pct.2	p_val_adj
LAIR2	5.30669997906317e-61	6.1579090307898	0.303	0.665	1.06133999581263e-57
ICOS	3.85168183292851e-17	6.05885460923929	0.416	0.642	7.70336366585702e-14
FOXP3	7.10386666316193e-135	5.97483575096566	0.22	0.613	1.42077333263239e-131
GZMK	1.09651741123717e-06	5.89075133875451	0.473	0.743	0.00219303482247433
CTLA4	9.84663686491326e-58	5.87685150446344	0.525	0.768	1.96932737298265e-54
TRBC1	2.38500768429361e-160	5.85343126159109	0.584	0.764	4.77001536858722e-157
CXCR6	2.36896306285946e-11	5.67164145592335	0.365	0.684	4.73792612571891e-08
XCL2	1.37623651200726e-24	5.62521950530723	0.392	0.724	2.75247302401452e-21
TRBV28	5.19438361212629e-24	5.51796966480328	0.136	0.343	1.03887672242526e-20
CD3D	0	5.50893479592245	0.824	0.745	0
CD7	0	5.42751138307753	0.766	0.785	0
TRGC2	1.16803187174242e-108	5.40657598164232	0.549	0.738	2.33606374348484e-105
CD3G	0	5.39057724177855	0.683	0.772	0
NKG7	0	5.36745700557932	0.776	0.795	0
SIRPG	7.24489466775823e-25	5.32695053163225	0.323	0.643	1.44897893355165e-21
TRAC	0	5.29669361927015	0.733	0.716	0
TRBC2	0	5.29173216450232	0.774	0.777	0
TNFRSF4	1.94835496330485e-11	5.28112582005092	0.343	0.652	3.89670992660971e-08
TIGIT	8.51636747265165e-207	5.26688216126787	0.58	0.716	1.70327349453033e-203
CCL5	0	5.26007264157931	0.861	0.811	0
CD2	0	5.23680685095287	0.787	0.78	0
IFNG	1.84024569994848e-256	5.22242925392835	0.623	0.772	3.68049139989695e-253
GZMA	0	5.12627175563437	0.714	0.768	0
SPOCK2	8.31863865464781e-44	5.11470793336777	0.461	0.659	1.66372773092956e-40
GNLY	0	5.10288122643675	0.68	0.846	0
GZMH	9.04088182838731e-48	5.10237462007243	0.542	0.774	1.80817636567746e-44
XCL1	7.18365419316367e-39	5.03267445984414	0.35	0.506	1.43673083863273e-35
GATA3	9.82660209755609e-116	4.97822425637483	0.437	0.561	1.96532041951122e-112
CRTAM	1.81228826468731e-11	4.97792972632956	0.445	0.708	3.62457652937462e-08
KLRD1	5.016421894379e-149	4.92365869514509	0.524	0.63	1.0032843788758e-145
CD27	1.71006399110714e-31	4.83845345478709	0.471	0.698	3.42012798221427e-28
AC092580.4	9.15803899098942e-61	4.76713587168498	0.53	0.762	1.83160779819788e-57
BATF	2.3870059473169e-208	4.70012363280761	0.569	0.688	4.77401189463381e-205
CTSW	1.40299504207779e-21	4.64694990670235	0.502	0.746	2.80599008415558e-18
KLRC1	6.39766815827484e-11	4.60221982022656	0.419	0.75	1.27953363165497e-07
THEMIS	3.78386947106203e-48	4.45284247245574	0.27	0.622	7.56773894212405e-45
TNFRSF9	5.31821538565155e-31	4.44124780194345	0.435	0.657	1.06364307713031e-27
CST7	0	4.31395622918212	0.757	0.779	0
AC133644.2	1.01731369060182e-11	4.2680948282772	0.304	0.499	2.03462738120364e-08
DUSP4	0	4.25114757393757	0.657	0.64	0
RGCC	0	3.96784144032515	0.696	0.76	0
CD52	0	3.8128011469135	0.871	0.794	0
TNFRSF18	2.21957323414164e-09	3.77150256621883	0.413	0.737	4.43914646828327e-06
GZMB	0	3.75871534125924	0.677	0.815	0
KRT86	4.23369037143789e-68	3.7546353681644	0.148	0.472	8.46738074287577e-65
CD69	0	3.74632905667838	0.927	0.85	0
TNFSF14	4.14828420135194e-200	3.74070211661596	0.448	0.504	8.29656840270389e-197
CXCR4	0	3.6875724856001	0.84	0.818	0
TNFSF8	6.30622293003034e-221	3.66233020698747	0.182	0.594	1.26124458600607e-217
IL32	0	3.64057265904842	0.877	0.819	0
CYTIP	0	3.51471594567032	0.684	0.785	0
ITM2A	6.82520727100667e-53	3.4612987524261	0.434	0.584	1.36504145420133e-49
PCSK1N	3.21941548568705e-271	3.42948130328869	0.29	0.286	6.4388309713741e-268
RHOH	2.21392143211977e-67	3.3151636896107	0.535	0.759	4.42784286423954e-64
RGS1	0	3.30388740727976	0.866	0.863	0
CD177	5.86644806026435e-174	3.28916154930475	0.265	0.328	1.17328961205287e-170
CORO1A	0	3.22222688675724	0.8	0.762	0
IL2RG	1.42034504372842e-211	3.18896795515458	0.612	0.745	2.84069008745683e-208
BIRC3	0	3.18571827353955	0.718	0.758	0
CD48	0	3.18462266042797	0.77	0.824	0
RUNX3	1.44528019754951e-173	3.1661922849214	0.601	0.746	2.89056039509903e-170
SLA	2.37573759881364e-29	3.11731987784298	0.411	0.599	4.75147519762729e-26
GPR65	6.76558308539409e-48	3.10351626415709	0.518	0.749	1.35311661707882e-44
VCAM1	1.97028419590321e-27	3.05874762076451	0.384	0.735	3.94056839180643e-24
ETS1	3.46092244993208e-131	3.03192735922263	0.52	0.637	6.92184489986416e-128
HCST	0	3.01296883601883	0.83	0.823	0
PKIA	2.94869574275844e-69	2.97522789716949	0.252	0.368	5.89739148551688e-66
TAGAP	1.84667007631624e-287	2.96961930477022	0.647	0.754	3.69334015263247e-284
ZNF331	1.28565863028206e-306	2.90323838861291	0.659	0.75	2.57131726056413e-303
DUSP2	0	2.89989867340029	0.909	0.865	0
PTPRC	0	2.83354018672548	0.841	0.811	0
GEM	1.59200752544275e-105	2.82446050117329	0.431	0.549	3.1840150508855e-102
GIMAP7	1.42193185297546e-21	2.75799178996633	0.5	0.754	2.84386370595092e-18
SAMSN1	3.30868472144257e-253	2.70717120044738	0.644	0.763	6.61736944288514e-250
GYPC	1.28147870057796e-43	2.67370133228855	0.51	0.72	2.56295740115591e-40
ID2	0	2.66016755267361	0.683	0.721	0
FYB	0	2.59692602276858	0.645	0.618	0
CLEC2B	0	2.58774316580826	0.794	0.868	0
CCR7	3.70155160497581e-190	2.54192234924971	0.287	0.741	7.40310320995161e-187
GIMAP1	4.83844313718857e-18	2.54086465286648	0.346	0.662	9.67688627437714e-15
FAM134B	8.82834152659239e-23	2.52667775693566	0.214	0.503	1.76566830531848e-19
CCR6	1.00063264834936e-92	2.52598400859397	0.172	0.507	2.00126529669871e-89
GIMAP6	4.8682364881477e-14	2.46359611664095	0.289	0.591	9.7364729762954e-11
RARRES3	8.67948797459363e-199	2.46017622241714	0.723	0.907	1.73589759491873e-195
APOA1	1.0530586544728e-20	2.45708777322954	0.128	0.441	2.10611730894559e-17
CD37	5.71229226956478e-243	2.45353344592291	0.645	0.76	1.14245845391296e-239
RGS2	0	2.43330550589547	0.75	0.788	0
ABI3	6.05954847851746e-60	2.42357404765138	0.418	0.564	1.21190969570349e-56
ARHGDIB	0	2.42092965333136	0.798	0.805	0
CENPM	1.19282712150716e-71	2.42010233283291	0.362	0.509	2.38565424301431e-68
TNFRSF1B	2.49470359775797e-43	2.41066929545875	0.489	0.68	4.98940719551593e-40
CSF2	4.10524049839805e-37	2.37769327445776	0.299	0.615	8.2104809967961e-34
IFITM2	0	2.36780921497583	0.868	0.797	0
ITGA1	6.32502294204124e-12	2.35917871584839	0.406	0.733	1.26500458840825e-08
TNFSF9	6.82333248729466e-09	2.35730540299124	0.449	0.77	1.36466649745893e-05
RP11-297N6.4	1.17415435165299e-42	2.32526358824763	0.207	0.37	2.34830870330599e-39
LINC00152	2.69072310024483e-129	2.31023704105621	0.552	0.666	5.38144620048965e-126
ALOX5AP	2.27017028416624e-223	2.29818968419296	0.59	0.646	4.54034056833248e-220
LPIN1	1.88180937970382e-63	2.28625684585642	0.358	0.493	3.76361875940765e-60
GIMAP4	1.23766672148252e-14	2.27204091943856	0.493	0.75	2.47533344296504e-11
BIN1	3.94768444911537e-10	2.26582028678443	0.376	0.677	7.89536889823075e-07
CARD16	1.4940815730961e-52	2.24630265377249	0.585	0.821	2.9881631461922e-49
HMGB2	5.83299803545292e-254	2.24433465754703	0.658	0.784	1.16659960709058e-250
GMFG	3.81410318759371e-222	2.24200332695938	0.662	0.805	7.62820637518742e-219
ANXA2R	1.37776055700884e-135	2.21568611217978	0.265	0.669	2.75552111401767e-132
SH3KBP1	7.42501142843942e-92	2.18495572170393	0.393	0.477	1.48500228568788e-88
PTGER4	5.00402848896512e-28	2.16721261255582	0.437	0.622	1.00080569779302e-24
PMAIP1	7.40694842717475e-183	2.13840195971807	0.697	0.874	1.48138968543495e-179
RP11-93B14.9	4.0710148342345e-32	2.13340764522062	0.281	0.448	8.14202966846901e-29
IFNL1	0	2.11915100135256	0.119	0.579	0
USP30-AS1	0	2.1045545817798	0.247	0.783	0
DNAJB4	3.64116370806025e-90	2.09802822729169	0.575	0.755	7.2823274161205e-87
NEDD9	1.37403338078259e-17	2.0924090569679	0.329	0.648	2.74806676156518e-14
DIRAS3	2.08861701551375e-06	2.09012938785058	0.192	0.381	0.00417723403102751
TMC8	1.21231101041907e-05	2.06142284902132	0.378	0.667	0.0242462202083814
ITM2C	2.19257744106078e-56	2.05616625700292	0.42	0.562	4.38515488212156e-53
IQGAP2	1.59104153922645e-09	2.05465999002119	0.326	0.516	3.1820830784529e-06
HAVCR2	4.01809241741471e-14	2.03622797127851	0.399	0.733	8.03618483482942e-11
NR4A2	3.07558018175141e-108	2.03163481998223	0.586	0.745	6.15116036350282e-105
CEP55	0	-2.0011	0.088	0.577	0
SNAI1	1.11621589143385e-25	-2.00513	0.088	0.406	2.23243178286771e-22
ITGA2	1.17975730284051e-266	-2.01603	0.101	0.57	2.35951460568102e-263
FGL2	3.61256012983565e-126	-2.01613	0.307	0.702	7.22512025967129e-123
TYROBP	4.70934940171096e-173	-2.01846	0.305	0.698	9.41869880342191e-170
KRT79	2.71547999469705e-42	-2.02408	0.015	0.261	5.4309599893941e-39
RP11-190C22.9	0	-2.02421	0.163	0.608	0
HLA-DPA1	2.84548332656959e-207	-2.02492	0.526	0.951	5.69096665313918e-204
KRT7	2.61084850742677e-08	-2.0277	0.145	0.424	5.22169701485354e-05
MCAM	7.36576299865715e-114	-2.0348	0.213	0.542	1.47315259973143e-110
NSG1	0	-2.04826	0.182	0.725	0
ASPRV1	5.05107447180153e-51	-2.04982	0.033	0.275	1.01021489436031e-47
HIST1H3G	3.1653541242584e-193	-2.05132	0.212	0.574	6.33070824851679e-190
KRT75	4.81931399814375e-23	-2.05652	0.064	0.411	9.6386279962875e-20
MAL	2.53783169469121e-144	-2.05819	0.28	0.626	5.07566338938242e-141
TTYH1	6.81666843262199e-06	-2.06116	0.145	0.331	0.013633336865244
NPB	5.61356830994134e-52	-2.062	0.034	0.416	1.12271366198827e-48
FAM111B	4.09881686418217e-305	-2.06353	0.068	0.539	8.19763372836433e-302
GOLM1	0	-2.06565	0.102	0.607	0
MFAP2	2.25134701952406e-12	-2.06914	0.115	0.333	4.50269403904811e-09
ELOVL4	1.56407149136544e-15	-2.07472	0.128	0.416	3.12814298273087e-12
KIF2C	0	-2.0782	0.064	0.642	0
NEK2	0	-2.08018	0.046	0.585	0
LINC01088	7.41387130607509e-12	-2.08518	0.001	0.259	1.48277426121502e-08
RGS18	1.42413380492896e-206	-2.09116	0.049	0.45	2.84826760985792e-203
HRH2	4.37830840889795e-181	-2.09918	0.196	0.585	8.75661681779589e-178
ASRGL1	1.60240482163807e-292	-2.11521	0.163	0.601	3.20480964327614e-289
KIAA0101	0	-2.11622	0.207	0.679	0
MUC4	0	-2.11885	0.049	0.559	0
CCL23	0	-2.1199	0.032	0.468	0
AKR1C3	0	-2.11996	0.132	0.627	0
ADM5	1.19961717849377e-244	-2.12035	0.193	0.557	2.39923435698754e-241
CEACAM6	5.60369955511287e-07	-2.12198	0.096	0.387	0.00112073991102257
AC006262.4	1.22696006675508e-82	-2.13412	0.004	0.424	2.45392013351015e-79
PLD3	0	-2.1355	0.218	0.701	0
SLC6A8	5.15438248420136e-139	-2.13694	0.083	0.517	1.03087649684027e-135
MCM10	0	-2.14227	0.07	0.59	0
RP11-295G20.2	2.27321829239255e-134	-2.14237	0.144	0.535	4.54643658478511e-131
AZGP1	1.03450539193486e-244	-2.14834	0.06	0.506	2.06901078386972e-241
IGHG4	3.75266803912908e-246	-2.15234	0.242	0.669	7.50533607825817e-243
CEACAM1	1.30528888974373e-173	-2.15793	0.16	0.547	2.61057777948745e-170
PKMYT1	0	-2.15887	0.027	0.552	0
TNFSF13B	0	-2.15898	0.145	0.743	0
ANLN	8.02346880568649e-188	-2.16387	0.033	0.456	1.6046937611373e-184
ITGAM	4.31732982237842e-132	-2.16492	0.06	0.47	8.63465964475683e-129
HMGB3	1.764851775202e-296	-2.17059	0.236	0.645	3.529703550404e-293
ATP6V1C2	1.0129517409946e-118	-2.17313	0.185	0.276	2.02590348198919e-115
ZWINT	0	-2.17592	0.177	0.694	0
SPRR2G	5.6913678357241e-15	-2.18301	0.065	0.278	1.13827356714482e-11
CCNB1	0	-2.18547	0.236	0.728	0
PRR11	2.76429738699184e-201	-2.18565	0.067	0.512	5.52859477398368e-198
S100A7A	7.6902446706371e-61	-2.18579	0.058	0.43	1.53804893412742e-57
GLUL	0	-2.18692	0.234	0.704	0
FAM83C	8.74077244454528e-187	-2.18752	0.129	0.536	1.74815448890906e-183
PTGDS	9.43962068235445e-106	-2.19382	0.178	0.539	1.88792413647089e-102
SLC16A10	0	-2.1949	0.162	0.642	0
CKAP2L	5.19174364220821e-217	-2.19896	0.234	0.611	1.03834872844164e-213
KRT15	3.35532185115886e-206	-2.19926	0.161	0.576	6.71064370231771e-203
NR1D1	8.11323993915204e-151	-2.20688	0.111	0.534	1.62264798783041e-147
RRM2	8.22489171313291e-72	-2.21197	0.21	0.517	1.64497834262658e-68
CLEC11A	1.18688976324388e-284	-2.22138	0.237	0.63	2.37377952648776e-281
CTSZ	0	-2.22249	0.237	0.702	0
NT5E	0	-2.23958	0.197	0.604	0
IGFL2	1.13496251132137e-202	-2.24146	0.079	0.524	2.26992502264274e-199
LGALS7	0	-2.25228	0.084	0.621	0
DRAM1	5.37706178602712e-188	-2.2546	0.145	0.541	1.07541235720542e-184
ETNK2	2.80992319497808e-134	-2.2678	0.169	0.538	5.61984638995615e-131
DUSP14	0	-2.27188	0.133	0.673	0
COL27A1	3.03264432434735e-127	-2.28282	0.103	0.489	6.0652886486947e-124
PLAT	0	-2.30137	0.184	0.708	0
MYH11	1.42992837153928e-264	-2.30747	0.222	0.659	2.85985674307856e-261
MAPRE3	5.93236066504237e-55	-2.31586	0.196	0.506	1.18647213300847e-51
NEXN	0	-2.32108	0.222	0.748	0
TUBB2A	0	-2.33178	0.19	0.773	0
QPCT	3.0262925132984e-58	-2.33486	0.114	0.474	6.05258502659681e-55
DHRS9	4.60087188729814e-120	-2.33525	0.089	0.265	9.20174377459628e-117
SPC25	1.0436658750184e-28	-2.34551	0.225	0.492	2.08733175003679e-25
KLK5	4.70331011559884e-183	-2.37161	0.056	0.505	9.40662023119768e-180
CD3EAP	1.6719155072263e-257	-2.37294	0.233	0.62	3.3438310144526e-254
PRPH	0	-2.37511	0.008	0.572	0
IL4I1	1.95537185125422e-170	-2.3842	0.174	0.568	3.91074370250844e-167
MSX1	9.78114518324913e-79	-2.39249	0.194	0.512	1.95622903664983e-75
KB-1732A1.1	1.22441487032965e-197	-2.39751	0.061	0.521	2.4488297406593e-194
BLVRB	0	-2.39918	0.186	0.841	0
RP11-20D14.6	0	-2.39965	0.157	0.616	0
WNT11	3.10319219819002e-238	-2.40377	0.082	0.528	6.20638439638005e-235
CSPG4	1.991350967122e-91	-2.41436	0.219	0.524	3.982701934244e-88
SULT1E1	4.70310047528604e-113	-2.4217	0.004	0.419	9.40620095057207e-110
BNIP3	2.26944331637543e-303	-2.42411	0.217	0.642	4.53888663275085e-300
C16orf74	2.22536844374803e-202	-2.4284	0.223	0.592	4.45073688749606e-199
AURKB	2.82458923588608e-77	-2.42865	0.249	0.559	5.64917847177216e-74
LRRC26	1.0441157487961e-125	-2.441	0.128	0.504	2.08823149759221e-122
VGLL1	6.61650262946499e-11	-2.44257	0.002	0.289	1.323300525893e-07
FCER1G	2.64657531193813e-166	-2.44631	0.313	0.703	5.29315062387625e-163
FOXC1	2.26606293516614e-193	-2.44852	0.138	0.545	4.53212587033227e-190
NDRG1	0	-2.44898	0.137	0.729	0
S100A6	0	-2.4532	0.824	0.98	0
RP11-1143G9.4	1.29001568852595e-05	-2.46877	0.141	0.44	0.0258003137705189
FOSL1	0	-2.47076	0.227	0.728	0
SERPINE2	1.4351999260555e-101	-2.47832	0.119	0.499	2.87039985211099e-98
SLC12A8	6.61345346581922e-59	-2.48043	0.16	0.482	1.32269069316384e-55
MUC1	0	-2.4832	0.247	0.723	0
SYNPO2	5.60383360471099e-22	-2.49082	0.206	0.48	1.1207667209422e-18
IL33	1.52411285538182e-05	-2.49104	0.094	0.374	0.0304822571076364
TNFRSF12A	0	-2.49105	0.181	0.791	0
DEGS2	4.78322899493078e-217	-2.49194	0.142	0.553	9.56645798986155e-214
HES1	0	-2.49972	0.18	0.685	0
RAMP1	1.09170930390474e-65	-2.50351	0.12	0.476	2.18341860780949e-62
PGF	2.57641763927357e-08	-2.50594	0.134	0.418	5.15283527854714e-05
ICAM1	0	-2.50889	0.246	0.729	0
JSRP1	3.7664984537593e-158	-2.52132	0.078	0.472	7.53299690751859e-155
SPRR2F	1.31675304167916e-13	-2.52623	0.081	0.369	2.63350608335833e-10
RRAD	7.10839993685846e-222	-2.53195	0.118	0.562	1.42167998737169e-218
ADGRF1	1.32829264620807e-113	-2.53212	0.198	0.273	2.65658529241613e-110
RP11-14N7.2	5.13806889199663e-206	-2.53291	0.184	0.574	1.02761377839933e-202
ABCA9	2.89680773627694e-193	-2.53481	0.026	0.426	5.79361547255388e-190
VGLL3	0	-2.53639	0.005	0.558	0
THBS1	0	-2.53934	0.191	0.646	0
PXDN	1.07661262266719e-12	-2.54386	0.183	0.375	2.15322524533437e-09
RP13-463N16.6	2.18180926069323e-07	-2.54676	0.004	0.333	0.000436361852138647
CENPA	0	-2.54696	0.176	0.642	0
IER3	0	-2.55238	0.276	0.865	0
LRG1	0	-2.55796	0.138	0.593	0
RP11-15I11.3	0	-2.57006	0.189	0.607	0
RAPSN	1.9572140545113e-42	-2.57735	0.072	0.416	3.9144281090226e-39
FCGR3A	1.01622828063219e-135	-2.58313	0.234	0.624	2.03245656126438e-132
TSPAN1	9.14957489515572e-06	-2.58323	0.137	0.416	0.0182991497903114
PBK	0	-2.58406	0.087	0.566	0
HJURP	0	-2.59621	0.023	0.633	0
FHL1	9.6597658266994e-49	-2.60466	0.147	0.475	1.93195316533988e-45
KRT19	2.00340446221355e-23	-2.60536	0.168	0.455	4.00680892442709e-20
FCGRT	7.96390420432644e-150	-2.61105	0.236	0.6	1.59278084086529e-146
VPREB3	6.38579775752195e-37	-2.61183	0.205	0.373	1.27715955150439e-33
CRIP2	0	-2.62274	0.25	0.732	0
TMEM79	0	-2.63116	0.178	0.682	0
TMPRSS11F	7.03305265742363e-15	-2.63431	0.007	0.321	1.40661053148473e-11
COL18A1	1.88341298204045e-38	-2.63516	0.192	0.494	3.7668259640809e-35
HYAL2	0	-2.63592	0.183	0.701	0
PLK1	0	-2.6444	0.053	0.539	0
DIAPH3	0	-2.64887	0.013	0.652	0
CLDN3	1.65784960357894e-104	-2.65143	0.049	0.461	3.31569920715787e-101
SNCA	2.491737453264e-245	-2.65423	0.155	0.562	4.983474906528e-242
SECTM1	0	-2.66086	0.212	0.752	0
SCGB2A1	2.71712527654509e-94	-2.66693	0.117	0.479	5.43425055309018e-91
ADCY4	1.44662088651061e-113	-2.66739	0.19	0.545	2.89324177302123e-110
ENG	1.15888973472038e-214	-2.6769	0.162	0.596	2.31777946944077e-211
LAIR1	0	-2.68029	0.093	0.65	0
ALDH1A3	1.18797582548517e-117	-2.68247	0.074	0.476	2.37595165097033e-114
VSIG2	7.06496036040911e-128	-2.68323	0.008	0.398	1.41299207208182e-124
CCNB2	0	-2.68445	0.128	0.721	0
LOXL1	0	-2.68628	0.159	0.603	0
PDLIM4	0	-2.68772	0.178	0.775	0
PFN2	3.21211210663818e-10	-2.68875	0.075	0.353	6.42422421327636e-07
OVOS2	3.11561591911256e-72	-2.68912	0.212	0.316	6.23123183822512e-69
HBB	0	-2.69608	0.007	0.573	0
CYP27B1	1.61391765753694e-126	-2.70275	0.079	0.48	3.22783531507387e-123
SLC15A1	1.97646877309805e-79	-2.70315	0.206	0.298	3.95293754619609e-76
GRHL1	7.57590532438548e-303	-2.70429	0.187	0.614	1.5151810648771e-299
SCNN1D	7.11810857798201e-23	-2.70438	0.026	0.301	1.4236217155964e-19
FLT1	6.83243972438649e-09	-2.7088	0.225	0.47	1.3664879448773e-05
EDN2	4.00272406920528e-185	-2.71408	0.141	0.521	8.00544813841056e-182
LTF	1.03845650772124e-47	-2.71939	0.073	0.282	2.07691301544249e-44
CLDN1	4.16207196373812e-195	-2.72106	0.063	0.517	8.32414392747624e-192
LTC4S	2.88955034821081e-148	-2.72625	0.086	0.509	5.77910069642163e-145
RP11-54H7.4	0	-2.73323	0.152	0.682	0
FMOD	1.42690797063351e-06	-2.73729	0.149	0.416	0.00285381594126702
ALOX12B	5.9380544488011e-127	-2.7384	0.061	0.46	1.18761088976022e-123
SYNPO2L	2.5102753242725e-108	-2.74012	0.002	0.392	5.020550648545e-105
DKK3	3.31016290796955e-99	-2.74044	0.125	0.486	6.62032581593911e-96
NDRG2	2.90682536778844e-99	-2.75248	0.154	0.518	5.81365073557688e-96
SEMA3G	5.15495274226631e-215	-2.76398	0.015	0.431	1.03099054845326e-211
CALB2	2.79419449169725e-12	-2.76502	0.078	0.312	5.5883889833945e-09
SORBS2	1.86159962391985e-142	-2.77331	0.174	0.547	3.7231992478397e-139
CPXM2	2.0629070375689e-45	-2.77985	0.218	0.506	4.12581407513781e-42
NR1H3	7.1752306502859e-225	-2.78298	0.101	0.547	1.43504613005718e-221
AC006262.5	2.0739592896471e-68	-2.78331	0.005	0.435	4.1479185792942e-65
HBA2	1.75663699894432e-155	-2.79711	0.064	0.496	3.51327399788863e-152
CDH15	8.00929093373381e-23	-2.80265	0.002	0.286	1.60185818674676e-19
WARS	0	-2.80337	0.319	0.902	0
KCNN3	4.14129460123313e-133	-2.80434	0.148	0.503	8.28258920246625e-130
MUCL1	5.404012976684e-61	-2.80521	0.131	0.271	1.0808025953368e-57
GJA1	0	-2.81128	0.097	0.632	0
A2ML1	5.72696647430364e-138	-2.8151	0.114	0.506	1.14539329486073e-134
TSLP	0	-2.81936	0.011	0.605	0
RHOBTB3	1.57360558499852e-87	-2.82081	0.184	0.517	3.14721116999704e-84
RP11-356J5.12	1.51811983297645e-168	-2.82134	0.125	0.535	3.0362396659529e-165
SDCBP2	2.64959385247713e-249	-2.82352	0.152	0.589	5.29918770495427e-246
SOD2	0	-2.82615	0.245	0.851	0
TWIST1	1.72663374238738e-256	-2.82789	0.225	0.632	3.45326748477475e-253
RP11-235E17.2	2.94969281858687e-275	-2.83231	0.004	0.477	5.89938563717375e-272
SDR9C7	4.3944628263183e-43	-2.83345	0.145	0.444	8.7889256526366e-40
HLA-DRA	0	-2.83941	0.51	0.965	0
ITGA3	0	-2.85479	0.159	0.69	0
CLU	7.55882270637939e-20	-2.8548	0.213	0.488	1.51176454127588e-16
ITGA6	1.09761812543393e-194	-2.85501	0.146	0.561	2.19523625086787e-191
LINC01133	2.36817346315147e-254	-2.85748	0.014	0.537	4.73634692630293e-251
ACKR3	6.68008832033427e-108	-2.86882	0.232	0.547	1.33601766406685e-104
CCDC88A	1.24075107019389e-267	-2.86917	0.164	0.603	2.48150214038778e-264
NTRK2	1.00248517461538e-114	-2.87806	0.04	0.449	2.00497034923077e-111
CHIT1	7.92991491143862e-52	-2.8784	0.003	0.351	1.58598298228772e-48
CFI	0	-2.89084	0.007	0.661	0
KLK6	5.45454071986851e-40	-2.89317	0.141	0.448	1.0909081439737e-36
EPAS1	2.69936526214585e-188	-2.89966	0.105	0.555	5.3987305242917e-185
CDCA3	8.14888266395294e-225	-2.90107	0.14	0.543	1.62977653279059e-221
ELN	8.10735286290627e-138	-2.90296	0.224	0.564	1.62147057258125e-134
SLAMF8	2.95223334780726e-251	-2.90629	0.219	0.644	5.90446669561451e-248
CP	6.89200500620356e-29	-2.91167	0.136	0.439	1.37840100124071e-25
MEF2C	1.24779501635079e-143	-2.91353	0.169	0.567	2.49559003270158e-140
EPCAM	6.45719041086042e-234	-2.9183	0.06	0.549	1.29143808217208e-230
TPM1	1.12413363850945e-238	-2.91831	0.106	0.565	2.24826727701889e-235
BCAS1	1.48596362980967e-16	-2.92496	0.086	0.385	2.97192725961934e-13
KRT31	1.08613144882905e-10	-2.92568	0.082	0.344	2.17226289765809e-07
TMC5	1.08036067244955e-82	-2.92798	0.037	0.415	2.16072134489911e-79
HAS3	0	-2.92811	0.082	0.651	0
MYO1B	7.45921473076014e-176	-2.92929	0.078	0.526	1.49184294615203e-172
CD86	4.75960302373961e-56	-2.93621	0.223	0.545	9.51920604747922e-53
SERPINE1	3.3184826599351e-137	-2.93808	0.177	0.545	6.63696531987021e-134
TRPV3	1.24775768022058e-06	-2.93883	0.009	0.355	0.00249551536044116
HEPHL1	3.01331800982838e-15	-2.94471	0.066	0.319	6.02663601965675e-12
CARD18	3.30876725709362e-29	-2.94963	0.129	0.419	6.61753451418725e-26
ABCC9	1.55445181114022e-126	-2.95034	0.003	0.362	3.10890362228044e-123
LMTK3	6.11047416196928e-27	-2.95107	0.092	0.443	1.22209483239386e-23
MDK	0	-2.95216	0.147	0.79	0
FOLR2	5.49412495914952e-24	-2.95915	0.183	0.471	1.0988249918299e-20
HMGA2	9.08971340710123e-255	-2.9628	0.029	0.526	1.81794268142025e-251
TXN	0	-2.96885	0.724	0.97	0
ALDH1A1	7.58757906606721e-77	-2.97169	0.068	0.463	1.51751581321344e-73
KLK8	0	-2.97435	0.165	0.611	0
FAM83A	2.93080883732087e-215	-2.97705	0.126	0.563	5.86161767464174e-212
SCD	1.41581416163428e-271	-2.97849	0.167	0.6	2.83162832326857e-268
GSTA4	0	-2.97996	0.188	0.76	0
DIO2	9.06507428947636e-239	-2.98258	0.191	0.578	1.81301485789527e-235
CCL27	2.58154411455285e-65	-2.98265	0.007	0.386	5.1630882291057e-62
KRT18	0	-2.98519	0.101	0.606	0
MAL2	0	-2.98672	0.154	0.68	0
CDC42EP2	9.71667772217207e-18	-2.98702	0.175	0.454	1.94333554443442e-14
LMO7	0	-2.99052	0.16	0.716	0
CFP	1.56379137632203e-48	-2.9957	0.224	0.539	3.12758275264406e-45
CNN1	5.90775275014877e-66	-3.00239	0.002	0.401	1.18155055002975e-62
EPHB3	3.71750064965831e-108	-3.00782	0.052	0.495	7.43500129931663e-105
HTRA1	3.76093223923842e-201	-3.01071	0.115	0.543	7.52186447847683e-198
VSIG8	0	-3.0128	0.159	0.588	0
ITGB4	3.37310096621659e-123	-3.01729	0.191	0.551	6.74620193243317e-120
CTSB	0	-3.02241	0.177	0.826	0
SPIB	0	-3.03022	0.204	0.708	0
PCDH7	0	-3.03183	0.197	0.651	0
DGAT2	3.2630934681807e-15	-3.03405	0.16	0.369	6.5261869363614e-12
POF1B	0	-3.03447	0.031	0.586	0
TNS2	4.54006801765417e-177	-3.03782	0.047	0.486	9.08013603530835e-174
SLITRK6	4.3129126343882e-07	-3.03988	0.207	0.378	0.000862582526877639
HK2	2.10584873669322e-127	-3.04162	0.135	0.519	4.21169747338644e-124
RASSF4	2.14484335052822e-306	-3.04446	0.17	0.636	4.28968670105644e-303
CITED4	0	-3.04482	0.093	0.749	0
UNC5B-AS1	0	-3.04568	0.241	0.68	0
LDB2	3.19220549407394e-184	-3.0465	0.178	0.556	6.38441098814788e-181
LY6K	0	-3.04829	0.136	0.733	0
KDELR3	7.46195543428845e-18	-3.04922	0.104	0.351	1.49239108685769e-14
EPHX1	1.04423494487646e-264	-3.05255	0.075	0.574	2.08846988975293e-261
EFEMP2	8.08882002964464e-270	-3.05494	0.195	0.593	1.61776400592893e-266
WFDC5	5.56419776810654e-35	-3.0557	0.005	0.402	1.11283955362131e-31
RAB20	4.62069916765294e-287	-3.05578	0.229	0.638	9.24139833530588e-284
KRT2	0	-3.06094	0.213	0.608	0
NQO1	0	-3.06827	0.226	0.791	0
SYT8	0	-3.07424	0.231	0.792	0
H1F0	0	-3.07529	0.101	0.634	0
SOSTDC1	6.32801421968552e-47	-3.0758	0.021	0.432	1.2656028439371e-43
PLEK2	0	-3.08224	0.145	0.639	0
CYP2E1	0	-3.08325	0.187	0.651	0
CLDN4	0	-3.08448	0.179	0.658	0
ADAMTS12	1.35271207378705e-25	-3.08828	0.006	0.271	2.7054241475741e-22
CCND1	0	-3.08979	0.194	0.75	0
APP	0	-3.09479	0.154	0.685	0
ITGB6	1.10263207783844e-09	-3.09554	0.183	0.371	2.20526415567688e-06
LURAP1L	1.6267841313217e-73	-3.09842	0.015	0.436	3.2535682626434e-70
VSIG4	4.38747864384064e-288	-3.09854	0.109	0.54	8.77495728768128e-285
PKP1	0	-3.09933	0.156	0.734	0
CDC20	0	-3.10098	0.143	0.615	0
CYP24A1	0	-3.10218	0.014	0.613	0
MEG3	4.38596420441613e-23	-3.10265	0.143	0.35	8.77192840883226e-20
CNNM1	1.53956054738655e-268	-3.10338	0.007	0.499	3.0791210947731e-265
TNNT2	2.27178482955276e-27	-3.10479	0.051	0.423	4.54356965910551e-24
CBR3	0	-3.10595	0.178	0.818	0
BASP1	2.10375903282771e-236	-3.1096	0.102	0.588	4.20751806565542e-233
AMOTL2	0	-3.11007	0.12	0.581	0
LYPD5	1.30038039659986e-112	-3.1122	0.103	0.485	2.60076079319972e-109
HES5	5.37441755636991e-22	-3.11728	0.035	0.404	1.07488351127398e-18
SERPINB2	1.99496579370212e-138	-3.12107	0.106	0.504	3.98993158740424e-135
GATA2	1.60475009083771e-113	-3.12173	0.264	0.597	3.20950018167542e-110
KRT1	0	-3.12259	0.183	0.663	0
BIRC5	1.98465631754383e-49	-3.12332	0.219	0.498	3.96931263508766e-46
ANXA3	2.53848797272006e-121	-3.12468	0.107	0.515	5.07697594544012e-118
SOX9	2.47307771620169e-75	-3.13167	0.066	0.466	4.94615543240338e-72
OVOL1	0	-3.13628	0.12	0.627	0
PLAUR	0	-3.13719	0.223	0.748	0
C1orf54	0	-3.1373	0.255	0.657	0
MMP1	3.03990595193924e-53	-3.13796	0.103	0.468	6.07981190387847e-50
CA2	0	-3.13906	0.262	0.826	0
SLC9A3R2	3.00894972370477e-112	-3.13966	0.063	0.494	6.01789944740955e-109
CLDN7	0	-3.14101	0.133	0.636	0
NOSTRIN	5.52291528620694e-63	-3.14436	0.049	0.412	1.10458305724139e-59
RBP1	0	-3.15035	0.079	0.679	0
SDR16C5	0	-3.15043	0.158	0.692	0
SAA1	8.14866776892471e-247	-3.15148	0.099	0.547	1.62973355378494e-243
DSG1	0	-3.15806	0.116	0.634	0
CDCA5	0	-3.15891	0.026	0.547	0
EFNA1	0	-3.15953	0.156	0.625	0
FABP4	5.74613453240845e-82	-3.16139	0.212	0.531	1.14922690648169e-78
CD40	0	-3.16704	0.226	0.661	0
ELF3	0	-3.16772	0.154	0.673	0
GGH	0	-3.16937	0.084	0.755	0
PHLDA2	0	-3.17007	0.193	0.826	0
FLNC	6.40975385114988e-63	-3.17532	0.024	0.415	1.28195077022998e-59
CPA4	5.79369158160423e-163	-3.18171	0.026	0.496	1.15873831632085e-159
CCDC3	1.66358310891545e-96	-3.18371	0.176	0.519	3.3271662178309e-93
MMP13	5.18812418102313e-18	-3.18834	0.025	0.358	1.03762483620463e-14
CSF2RB	3.45391104840255e-213	-3.19397	0.079	0.532	6.90782209680509e-210
IFI30	3.15373595613407e-237	-3.19472	0.052	0.541	6.30747191226814e-234
FAM3B	5.95807159844656e-114	-3.19496	0.083	0.492	1.19161431968931e-110
RDH12	2.0493173842336e-243	-3.19958	0.058	0.531	4.0986347684672e-240
TNFSF15	3.14719374316785e-18	-3.1998	0.036	0.41	6.29438748633569e-15
GPX2	0	-3.20054	0.069	0.574	0
KLK1	3.86689825448519e-149	-3.20166	0.19	0.544	7.73379650897039e-146
KRT8	3.49986514152041e-38	-3.20331	0.075	0.433	6.99973028304082e-35
CERCAM	0	-3.20353	0.075	0.6	0
MBOAT2	0	-3.20519	0.093	0.607	0
PLA2G2F	4.22493457577923e-45	-3.20855	0.018	0.396	8.44986915155845e-42
PI3	0	-3.21183	0.265	0.687	0
FAM3D	8.17341493702109e-06	-3.22421	0.118	0.356	0.0163468298740422
VSIG10L	1.30674881306515e-253	-3.2247	0.149	0.567	2.61349762613031e-250
HSPB6	0	-3.22794	0.005	0.602	0
AKR1C2	2.71310738377983e-263	-3.22823	0.119	0.58	5.42621476755967e-260
CYP26B1	6.31705191086263e-154	-3.23153	0.016	0.483	1.26341038217253e-150
CTSK	3.90662085711902e-29	-3.2318	0.101	0.418	7.81324171423804e-26
CDC42EP4	0	-3.23415	0.159	0.667	0
DLX5	4.60865183885816e-64	-3.23533	0.044	0.446	9.21730367771632e-61
CES1	2.49910886568196e-09	-3.23639	0.085	0.377	4.99821773136392e-06
IL36G	0	-3.23716	0.116	0.621	0
WDR66	9.34916776781284e-279	-3.23765	0.121	0.586	1.86983355356257e-275
LST1	2.34565042488583e-173	-3.23793	0.205	0.6	4.69130084977165e-170
PRKCDBP	9.14764398233995e-238	-3.24343	0.096	0.559	1.82952879646799e-234
FAM132A	0	-3.24453	0.232	0.695	0
MSMB	2.92001032669873e-29	-3.24946	0.005	0.373	5.84002065339746e-26
TMEM233	2.9826260708108e-95	-3.25126	0.021	0.412	5.96525214162159e-92
ID1	0	-3.25413	0.22	0.796	0
CTSV	1.44909683427075e-152	-3.26319	0.172	0.545	2.8981936685415e-149
CITED1	8.09299577641806e-27	-3.26729	0.002	0.395	1.61859915528361e-23
COL7A1	2.25849284611914e-35	-3.26923	0.174	0.468	4.51698569223828e-32
RNF39	5.15147798746242e-15	-3.27178	0.015	0.311	1.03029559749248e-11
CLCA4	1.33951219613226e-42	-3.27604	0.02	0.409	2.67902439226452e-39
CYP4B1	1.13456091993291e-254	-3.27934	0.179	0.552	2.26912183986581e-251
KHDC1L	3.03697192795171e-151	-3.28543	0.177	0.547	6.07394385590342e-148
ENO3	2.84263636883574e-97	-3.28865	0.08	0.466	5.68527273767149e-94
TCN2	1.52591774242371e-26	-3.29351	0.234	0.53	3.05183548484742e-23
TNFRSF11B	3.56129267502762e-09	-3.29478	0.001	0.319	7.12258535005525e-06
CKB	0	-3.29753	0.095	0.6	0
KLK10	0	-3.29923	0.134	0.68	0
MYCL	5.61845023682243e-158	-3.30268	0.057	0.53	1.12369004736449e-154
EPN3	2.09980253531504e-19	-3.30309	0.048	0.411	4.19960507063008e-16
UBE2C	8.86609916254462e-181	-3.30452	0.178	0.567	1.77321983250892e-177
LAMC2	9.3232668251737e-188	-3.30963	0.157	0.551	1.86465336503474e-184
IFITM3	0	-3.31478	0.511	0.952	0
PRSS23	5.9604840982045e-25	-3.32276	0.138	0.456	1.1920968196409e-21
LCE3D	1.25808948435338e-56	-3.32527	0.088	0.434	2.51617896870676e-53
LAMA3	0	-3.32783	0.148	0.63	0
FAM25G	0	-3.32856	0.255	0.722	0
MYLPF	1.40712995975736e-07	-3.3319	0.126	0.35	0.000281425991951472
CHST1	9.25446661642936e-251	-3.33482	0.049	0.53	1.85089332328587e-247
TP53AIP1	0	-3.33822	0.143	0.641	0
CSRP2	0	-3.34009	0.12	0.689	0
DLGAP5	0	-3.34355	0.07	0.56	0
TROAP	0	-3.34633	0.068	0.627	0
PAPPA	5.14439943288099e-21	-3.34858	0.066	0.408	1.0288798865762e-17
MMP2	7.11335682092342e-97	-3.3486	0.143	0.284	1.42267136418468e-93
FAM64A	3.73502342299729e-205	-3.3498	0.014	0.437	7.47004684599459e-202
TIFAB	0	-3.35679	0.124	0.684	0
EPB41L3	7.93229491578917e-307	-3.35736	0.128	0.574	1.58645898315783e-303
COL5A3	0	-3.35984	0.193	0.629	0
TMEM45B	0	-3.36037	0.098	0.647	0
SDC1	0	-3.36231	0.14	0.744	0
MYLK	0	-3.36278	0.232	0.69	0
STAB1	0	-3.36449	0.104	0.657	0
PTHLH	1.55347256999607e-100	-3.36595	0.103	0.489	3.10694513999215e-97
IGF2BP2	0	-3.36675	0.087	0.599	0
FBP1	4.25610475964453e-55	-3.36683	0.235	0.533	8.51220951928907e-52
IVL	0	-3.3689	0.151	0.674	0
TPPP3	0	-3.37126	0.145	0.755	0
TIMP1	0	-3.37189	0.183	0.851	0
IL1A	5.58956789677108e-151	-3.38733	0.073	0.504	1.11791357935422e-147
CTSH	0	-3.38853	0.137	0.697	0
ADAP2	2.36234196747245e-228	-3.39652	0.167	0.581	4.7246839349449e-225
BCAM	1.41153484500852e-155	-3.39654	0.177	0.548	2.82306969001705e-152
CXCL14	0	-3.4027	0.157	0.673	0
LINC01559	1.83197242956353e-54	-3.40688	0.045	0.416	3.66394485912707e-51
SAA2	9.60531022833176e-102	-3.40933	0.037	0.443	1.92106204566635e-98
F12	0	-3.40998	0.197	0.792	0
S100A13	0	-3.41183	0.176	0.73	0
KCNK7	1.32782960281074e-265	-3.41464	0.111	0.553	2.65565920562149e-262
IL36RN	2.94559212925503e-261	-3.41537	0.228	0.59	5.89118425851006e-258
DSC2	0	-3.4163	0.158	0.73	0
ALDH3A1	0	-3.41636	0.251	0.82	0
UCHL1	1.64746889695703e-07	-3.41794	0.003	0.311	0.000329493779391406
LYVE1	4.02955504372983e-23	-3.42431	0	0.324	8.05911008745966e-20
LGALS7B	0	-3.42438	0.185	0.76	0
C2orf54	0	-3.42878	0.064	0.721	0
PTGR1	0	-3.43126	0.183	0.773	0
PLAU	0	-3.43145	0.185	0.654	0
CST6	3.28329245015531e-174	-3.43655	0.05	0.513	6.56658490031061e-171
C8orf4	1.76155305854591e-170	-3.43751	0.062	0.491	3.52310611709181e-167
POSTN	5.61444482679395e-06	-3.43853	0.03	0.28	0.0112288896535879
IL18	0	-3.44683	0.211	0.816	0
F13A1	8.53308617853464e-23	-3.44741	0.048	0.376	1.70661723570693e-19
ECM1	0	-3.44763	0.125	0.652	0
C1orf167	0	-3.44864	0.21	0.695	0
KLK12	5.5090475148568e-256	-3.45522	0.048	0.519	1.10180950297136e-252
ZNF385D	2.10284113807361e-226	-3.45728	0.004	0.483	4.20568227614721e-223
BMP2	0	-3.45793	0.195	0.638	0
DAPL1	0	-3.46859	0.198	0.772	0
KRT78	1.74559395787759e-22	-3.46975	0.135	0.325	3.49118791575518e-19
GRHL3	3.71634595468519e-152	-3.47231	0.184	0.525	7.43269190937038e-149
CXCL10	0	-3.47359	0.32	0.825	0
TACSTD2	0	-3.47452	0.159	0.757	0
DSP	0	-3.47739	0.174	0.758	0
IGF1	6.0813577378568e-124	-3.47888	0.226	0.56	1.21627154757136e-120
HSPB8	0	-3.47938	0.226	0.671	0
TM4SF1	0	-3.48104	0.112	0.679	0
AL773572.7	1.62647068478453e-153	-3.48228	0.203	0.285	3.25294136956907e-150
IGFBP6	0	-3.48263	0.231	0.776	0
SERPINB4	0	-3.48284	0.132	0.632	0
CDH3	0	-3.4922	0.075	0.67	0
CXCL17	0	-3.49372	0.092	0.619	0
SFRP1	2.05279035941375e-15	-3.49423	0.044	0.404	4.10558071882751e-12
FAM25A	0	-3.50111	0.09	0.613	0
FAM129B	0	-3.50673	0.148	0.687	0
DEFB1	0	-3.50724	0.104	0.682	0
KRT80	1.12784926256653e-99	-3.50832	0.02	0.447	2.25569852513305e-96
HCAR2	0	-3.51115	0.194	0.642	0
AOC1	7.75063908880612e-09	-3.51458	0.038	0.303	1.55012781776122e-05
ADH7	0	-3.51671	0.068	0.627	0
CPE	5.7146905173405e-10	-3.52063	0.109	0.332	1.1429381034681e-06
LGALSL	0	-3.52672	0.135	0.729	0
SLC11A1	1.31717424001113e-41	-3.52855	0.131	0.339	2.63434848002225e-38
S100A3	0	-3.52965	0.055	0.654	0
CTC-518B2.8	3.8053041182888e-63	-3.52983	0.185	0.475	7.6106082365776e-60
IGFBP2	0	-3.53284	0.17	0.731	0
TH	1.24748839743456e-206	-3.53336	0.004	0.462	2.49497679486913e-203
HBEGF	0	-3.53857	0.112	0.721	0
COL17A1	6.38962036067814e-169	-3.53891	0.121	0.521	1.27792407213563e-165
MMP19	3.05271877177826e-280	-3.53982	0.093	0.554	6.10543754355652e-277
C10orf10	1.13609385392842e-47	-3.54332	0.196	0.343	2.27218770785684e-44
ITGB1BP2	1.55975929008388e-166	-3.54337	0.008	0.46	3.11951858016776e-163
PRSS22	5.7085069803521e-176	-3.54684	0.062	0.511	1.14170139607042e-172
KRT4	2.30783274315927e-130	-3.547	0.248	0.593	4.61566548631855e-127
C1orf68	0	-3.54839	0.051	0.59	0
RGS5	2.43349859769435e-240	-3.549	0.018	0.441	4.86699719538871e-237
KRT5	0	-3.54949	0.591	0.912	0
RHOD	0	-3.55507	0.19	0.779	0
TNNT1	0	-3.55528	0.061	0.668	0
CALML5	0	-3.5654	0.173	0.736	0
S100A2	0	-3.56825	0.631	0.926	0
TNFRSF21	6.62708002809654e-101	-3.56981	0.164	0.521	1.32541600561931e-97
KLK7	0	-3.5742	0.098	0.605	0
LYPD3	0	-3.57519	0.187	0.777	0
IGKC	4.36416372516485e-288	-3.57545	0.21	0.692	8.72832745032969e-285
TNNI2	0	-3.5828	0.169	0.63	0
EHF	8.80119113705715e-132	-3.58335	0.037	0.507	1.76023822741143e-128
EVPL	0	-3.58836	0.138	0.633	0
RAET1L	0	-3.59836	0.233	0.687	0
ADM	0	-3.59841	0.196	0.662	0
SLC7A8	1.72998887287278e-219	-3.60016	0.074	0.543	3.45997774574557e-216
AKR1B10	0	-3.60538	0.184	0.791	0
GPRC5A	4.44584225264608e-206	-3.61336	0.122	0.539	8.89168450529215e-203
SERPINB7	3.00170044624892e-14	-3.61348	0.003	0.364	6.00340089249784e-11
ADAMTS4	8.0504917869518e-13	-3.61721	0.204	0.384	1.61009835739036e-09
LINC00520	9.13877825916507e-91	-3.61846	0.067	0.28	1.82775565183301e-87
IGFBP4	5.03592194175731e-73	-3.62723	0.218	0.538	1.00718438835146e-69
TNC	0	-3.62883	0.207	0.626	0
NOV	1.1656167707399e-288	-3.63152	0.057	0.534	2.3312335414798e-285
SULT2B1	0	-3.63246	0.128	0.67	0
FAM84A	0	-3.63248	0.186	0.717	0
PHACTR1	1.47605203385229e-108	-3.63525	0.14	0.527	2.95210406770458e-105
FST	0	-3.6359	0.16	0.624	0
CRABP2	0	-3.64913	0.232	0.823	0
AQP3	0	-3.651	0.308	0.855	0
IGHG1	7.49319347190924e-136	-3.65344	0.094	0.49	1.49863869438185e-132
TMEM45A	7.24762484198278e-113	-3.65534	0.059	0.493	1.44952496839656e-109
RHOV	0	-3.65661	0.098	0.8	0
RAB32	0	-3.66032	0.169	0.636	0
LINC00707	9.71301954939451e-105	-3.66103	0.005	0.431	1.9426039098789e-101
SEPT4	4.25264549283001e-69	-3.66123	0.126	0.492	8.50529098566001e-66
AQP9	2.86294977627355e-14	-3.66152	0.125	0.328	5.72589955254711e-11
GABRP	0	-3.66403	0.004	0.478	0
MYEOV	0	-3.66473	0.169	0.591	0
FBLN1	6.81719607822047e-14	-3.6648	0.066	0.424	1.36343921564409e-10
GJB6	0	-3.66969	0.114	0.699	0
SNAI2	1.41566376443369e-155	-3.67033	0.05	0.5	2.83132752886737e-152
SPP1	1.1770992239422e-42	-3.67188	0.16	0.324	2.3541984478844e-39
FABP5	0	-3.67726	0.81	0.977	0
FAM213A	0	-3.6807	0.206	0.813	0
TAGLN	6.22498238715516e-275	-3.68515	0.179	0.594	1.24499647743103e-271
CDH16	7.9574582423643e-65	-3.68813	0.011	0.439	1.59149164847286e-61
ZG16B	1.42475701701836e-17	-3.68824	0.147	0.441	2.84951403403672e-14
OTOA	1.12534454395532e-71	-3.69151	0.042	0.392	2.25068908791065e-68
LAMB3	2.03701829245475e-238	-3.6949	0.1	0.557	4.07403658490951e-235
TIMP3	4.95897396265486e-108	-3.69703	0.168	0.517	9.91794792530972e-105
SOX2	4.31745765841972e-106	-3.70418	0.022	0.468	8.63491531683945e-103
TGM1	0	-3.71029	0.166	0.686	0
CRYAB	0	-3.71366	0.206	0.808	0
HDC	0	-3.72669	0.212	0.675	0
RAI14	1.36017003037385e-09	-3.72707	0.099	0.419	2.72034006074769e-06
PODXL	7.43178613524502e-24	-3.72944	0.086	0.394	1.486357227049e-20
NMU	0	-3.73097	0.143	0.709	0
FAM46B	0	-3.73415	0.084	0.647	0
SEPP1	0	-3.73642	0.136	0.769	0
MMP7	2.38784128639125e-19	-3.73779	0.083	0.397	4.7756825727825e-16
FILIP1L	5.69620093544009e-193	-3.73821	0.191	0.572	1.13924018708802e-189
ADIRF	0	-3.74449	0.134	0.77	0
PDZK1IP1	0	-3.74636	0.109	0.688	0
DST	0	-3.74887	0.077	0.621	0
S100A7	0	-3.74942	0.377	0.789	0
S100P	2.07217878930061e-95	-3.75172	0.126	0.477	4.14435757860123e-92
MFAP5	5.74960540609271e-68	-3.76074	0.01	0.425	1.14992108121854e-64
PRRX2	4.38675445078533e-66	-3.76126	0.165	0.478	8.77350890157066e-63
EMP1	0	-3.76178	0.194	0.773	0
CLSTN2	1.9474854472911e-18	-3.76354	0.003	0.369	3.8949708945822e-15
MMP28	1.20777132175325e-59	-3.76898	0.182	0.482	2.4155426435065e-56
SCEL	0	-3.77194	0.031	0.586	0
HSPB2	3.34534774098591e-193	-3.77383	0.204	0.578	6.69069548197182e-190
MUC15	0	-3.77485	0.072	0.57	0
PTRF	0	-3.77729	0.16	0.694	0
PLTP	0	-3.77815	0.058	0.662	0
IGFBP3	2.28538876134566e-133	-3.78796	0.126	0.513	4.57077752269131e-130
TMEM158	6.38793440455186e-245	-3.78956	0.142	0.573	1.27758688091037e-241
MALL	0	-3.79266	0.152	0.71	0
CD248	0	-3.79505	0.16	0.718	0
FERMT1	0	-3.79686	0.081	0.603	0
PRSS27	1.94105427940158e-253	-3.80039	0.036	0.524	3.88210855880316e-250
RNASE7	2.58551663955769e-43	-3.80254	0.003	0.265	5.17103327911539e-40
LARP6	0	-3.805	0.068	0.568	0
TIMP2	3.12206407140641e-116	-3.81497	0.214	0.564	6.24412814281281e-113
ALDH3B2	0	-3.81643	0.156	0.598	0
APOBEC3A	0	-3.817	0.16	0.648	0
PCOLCE	3.05126897801764e-28	-3.81858	0.19	0.48	6.10253795603528e-25
CTSL	0	-3.82419	0.168	0.739	0
EGFL7	2.50496609389008e-186	-3.83069	0.187	0.564	5.00993218778017e-183
PDGFRB	4.4017242057572e-221	-3.8322	0.109	0.527	8.8034484115144e-218
NUPR1	0	-3.83257	0.114	0.795	0
DERL3	6.3533561338172e-07	-3.83844	0.074	0.328	0.00127067122676344
B3GNT3	0	-3.84045	0.062	0.544	0
FILIP1	2.04599710873583e-13	-3.84078	0.002	0.377	4.09199421747165e-10
CH25H	0	-3.8425	0.035	0.595	0
GPX3	0	-3.84475	0.059	0.625	0
KLK11	0	-3.84542	0.142	0.719	0
SLC18A2	0	-3.84621	0.195	0.644	0
CDA	0	-3.8499	0.114	0.677	0
EDNRB	5.01094855658934e-57	-3.85036	0.218	0.458	1.00218971131787e-53
MMP10	7.0561292849859e-47	-3.85174	0.121	0.457	1.41122585699718e-43
LCE3A	1.4303433354725e-91	-3.85773	0.008	0.396	2.860686670945e-88
PPL	0	-3.85839	0.102	0.684	0
GPNMB	0	-3.85928	0.075	0.704	0
GAS6	0	-3.86044	0.132	0.763	0
NEFL	0	-3.87012	0.06	0.575	0
CD24	0	-3.87207	0.104	0.658	0
RP11-295M3.4	0	-3.87353	0.007	0.545	0
SLC15A3	0	-3.88139	0.228	0.827	0
KCNN1	1.15104106006606e-171	-3.88464	0.121	0.468	2.30208212013212e-168
F3	0	-3.88498	0.159	0.646	0
CXorf36	0	-3.88932	0.087	0.539	0
KLHL41	3.23452859677396e-16	-3.88933	0.007	0.38	6.46905719354792e-13
GJB2	0	-3.89061	0.157	0.776	0
PRSS8	4.29312697141577e-213	-3.89268	0.028	0.527	8.58625394283154e-210
MMP9	0	-3.89414	0.124	0.602	0
TENM2	0	-3.89461	0.077	0.56	0
SLC6A14	8.10648184110449e-82	-3.90203	0.016	0.407	1.6212963682209e-78
CSTB	0	-3.90312	0.691	0.97	0
LY6G6C	0	-3.90621	0.194	0.642	0
GBP6	0	-3.91376	0.195	0.818	0
LOX	0	-3.91407	0.174	0.632	0
SLC39A2	2.70880434317789e-284	-3.9145	0.028	0.538	5.41760868635579e-281
IDO1	0	-3.9165	0.222	0.76	0
EREG	4.87959164580578e-228	-3.92525	0.101	0.546	9.75918329161156e-225
IL22RA2	0	-3.93142	0.017	0.661	0
RAET1G	0	-3.93435	0.016	0.628	0
FABP3	6.43356713011543e-25	-3.93458	0.001	0.297	1.28671342602309e-21
CYYR1	3.58385861331495e-09	-3.93485	0.12	0.419	7.16771722662989e-06
C10orf99	0	-3.93574	0.246	0.806	0
SPINK6	0	-3.93578	0.236	0.759	0
APOE	0	-3.93618	0.157	0.681	0
S100A12	0	-3.94579	0.118	0.631	0
SCNN1A	7.89011901099708e-85	-3.94672	0.081	0.49	1.57802380219942e-81
DNAH5	1.27790164733092e-73	-3.94699	0.008	0.438	2.55580329466184e-70
KRT14	0	-3.95032	0.902	0.988	0
DNASE1L3	0	-3.95043	0.192	0.672	0
CCNA1	0	-3.96364	0.106	0.733	0
SMIM5	0	-3.9671	0.067	0.594	0
LINC00958	0	-3.96732	0.033	0.599	0
DMKN	0	-3.97184	0.177	0.761	0
CXCL3	3.62906313960707e-116	-3.97364	0.219	0.553	7.25812627921414e-113
SLC7A11	5.21017853941077e-71	-3.97844	0.093	0.475	1.04203570788215e-67
CRISPLD2	1.84897732300191e-303	-3.9811	0.106	0.576	3.69795464600382e-300
KRT13	3.09370388749212e-298	-3.9829	0.676	0.948	6.18740777498424e-295
TUBB2B	5.26645960331138e-240	-3.98578	0.002	0.488	1.05329192066228e-236
ENDOU	1.16842591703716e-139	-3.98771	0.194	0.515	2.33685183407431e-136
COL6A2	1.24201536758152e-29	-3.9881	0.176	0.466	2.48403073516304e-26
TCF4	1.63315747374867e-160	-3.99157	0.158	0.554	3.26631494749734e-157
VEGFC	1.62540949344769e-305	-3.9919	0.023	0.537	3.25081898689539e-302
S100A14	0	-3.99884	0.307	0.833	0
EFEMP1	0	-3.99909	0.194	0.66	0
SERPINB3	0	-4.00057	0.17	0.737	0
IGFL1	0	-4.00145	0.137	0.657	0
AKR1C1	0	-4.00354	0.118	0.71	0
IL11	0	-4.00575	0.202	0.616	0
PLA2G3	0	-4.00722	0.182	0.592	0
AIF1L	2.16932599445061e-30	-4.01117	0.023	0.427	4.33865198890123e-27
ASPG	0	-4.01319	0.178	0.664	0
NRG1	0	-4.01443	0.046	0.685	0
LHFP	3.81462010016213e-190	-4.01478	0.205	0.56	7.62924020032426e-187
GDF15	1.37727167355239e-30	-4.01854	0.071	0.308	2.75454334710479e-27
INHBA	0	-4.01977	0.195	0.629	0
PTGS2	1.19702512038452e-104	-4.02079	0.14	0.521	2.39405024076905e-101
PGLYRP4	5.36388858739665e-46	-4.02168	0.003	0.415	1.07277771747933e-42
C1R	0	-4.02238	0.209	0.753	0
LCE1C	1.18356053504108e-238	-4.02284	0.008	0.495	2.36712107008217e-235
IFI27	0	-4.02374	0.553	0.94	0
SGCD	2.74586279941903e-25	-4.02384	0.08	0.379	5.49172559883807e-22
RP11-557H15.3	0	-4.03623	0.139	0.634	0
UPK1B	0	-4.04067	0.004	0.522	0
MFAP4	0	-4.04086	0.172	0.606	0
SOWAHC	0	-4.04234	0.107	0.635	0
EPGN	0	-4.04532	0.14	0.648	0
PITX1	0	-4.04576	0.186	0.842	0
PLOD2	7.41875488119797e-23	-4.05517	0.181	0.454	1.48375097623959e-19
KIF20A	0	-4.05587	0.004	0.597	0
TGFB1I1	0	-4.05699	0.046	0.595	0
CXCL2	0	-4.05863	0.227	0.676	0
KRT6B	0	-4.05987	0.491	0.911	0
CAPNS2	0	-4.06033	0.171	0.73	0
TFPI2	3.28210345034803e-225	-4.06064	0.121	0.503	6.56420690069607e-222
FN1	8.98967430978784e-33	-4.06123	0.139	0.321	1.79793486195757e-29
MB	2.39875868795306e-18	-4.06303	0.007	0.337	4.79751737590612e-15
CYSRT1	0	-4.06436	0.169	0.709	0
CFD	0	-4.06457	0.114	0.611	0
LIMCH1	6.79188397977635e-94	-4.06475	0.111	0.486	1.35837679595527e-90
NEURL3	0	-4.06748	0.075	0.667	0
SLPI	0	-4.06979	0.212	0.775	0
LRRC17	0	-4.07057	0.023	0.561	0
NCF2	1.13824606705742e-64	-4.07306	0.122	0.48	2.27649213411483e-61
TMEM40	0	-4.07335	0.171	0.743	0
KRT6C	0	-4.0754	0.456	0.883	0
TGM2	0	-4.07684	0.19	0.69	0
GDPD3	4.05104097049116e-263	-4.08064	0.054	0.545	8.10208194098232e-260
CTD-2619J13.13	1.24071999478081e-23	-4.08108	0.024	0.385	2.48143998956162e-20
CTC-573N18.1	0	-4.08343	0.203	0.722	0
JCHAIN	4.12313581655526e-210	-4.08948	0.194	0.615	8.24627163311052e-207
PSCA	9.73320527560771e-131	-4.09504	0.094	0.488	1.94664105512154e-127
PLN	0	-4.09571	0.003	0.531	0
FGFBP1	0	-4.10204	0.193	0.772	0
SH3BGRL2	1.56929026761609e-77	-4.10612	0.07	0.454	3.13858053523217e-74
TNFAIP2	0	-4.10716	0.176	0.637	0
NCCRP1	3.83612068385589e-40	-4.10762	0.066	0.431	7.67224136771179e-37
FFAR2	3.73077896709206e-32	-4.11464	0.154	0.461	7.46155793418411e-29
RND3	0	-4.11651	0.11	0.809	0
CALML3	0	-4.11866	0.233	0.806	0
ARHGAP29	7.17215603506454e-106	-4.1189	0.141	0.5	1.43443120701291e-102
SFN	0	-4.11994	0.565	0.933	0
ADRA2A	7.04729792745832e-160	-4.1255	0.062	0.408	1.40945958549166e-156
TMPRSS11D	0	-4.1263	0.141	0.643	0
MYBL2	5.86006581637038e-154	-4.1288	0.071	0.502	1.17201316327408e-150
RNASE1	9.47714159875894e-134	-4.12888	0.252	0.614	1.89542831975179e-130
TM4SF19	4.6252609315881e-173	-4.13176	0.068	0.512	9.2505218631762e-170
SPRR4	2.95889669895115e-16	-4.13495	0.011	0.25	5.9177933979023e-13
CLEC4E	0	-4.13545	0.05	0.608	0
C5orf66-AS1	0	-4.13893	0.115	0.595	0
CRCT1	3.15951335689305e-112	-4.14488	0.149	0.508	6.3190267137861e-109
ALOX12	1.61798894831387e-260	-4.15066	0.008	0.514	3.23597789662773e-257
RHCG	0	-4.15333	0.184	0.659	0
RP11-394O4.5	4.72345446569051e-126	-4.15389	0.191	0.263	9.44690893138103e-123
KRT17	0	-4.16178	0.598	0.933	0
COX7A1	5.42467933546508e-211	-4.16291	0.066	0.535	1.08493586709302e-207
NEB	1.65657198578138e-41	-4.17075	0.002	0.275	3.31314397156277e-38
TPM2	0	-4.1769	0.061	0.66	0
KRT16	0	-4.17798	0.642	0.951	0
CAV1	0	-4.18224	0.198	0.649	0
SHROOM3	2.55977562550627e-81	-4.18749	0.025	0.462	5.11955125101255e-78
CXCL11	0	-4.19362	0.178	0.795	0
TGM3	0	-4.194	0.124	0.619	0
MT1M	1.59805971176856e-115	-4.19431	0.133	0.5	3.19611942353712e-112
DNAAF1	1.5373415793804e-261	-4.19478	0.075	0.527	3.07468315876079e-258
CXCL1	7.44068560091143e-08	-4.19655	0.159	0.439	0.000148813712018229
COL12A1	8.4467387418172e-25	-4.2	0.158	0.436	1.68934774836344e-21
KRT6A	0	-4.21497	0.72	0.958	0
PTN	0	-4.21591	0.213	0.674	0
TMPRSS11A	0	-4.2249	0.216	0.751	0
S100A8	0	-4.22584	0.918	0.992	0
ATP6V0D2	2.85322618766425e-144	-4.22954	0.005	0.461	5.7064523753285e-141
MSR1	7.07293302378436e-82	-4.23493	0.096	0.474	1.41458660475687e-78
TGFBI	0	-4.23887	0.137	0.642	0
RP4-541C22.5	1.33967217233304e-44	-4.23994	0.006	0.419	2.67934434466608e-41
CTHRC1	1.19414518318535e-10	-4.24472	0.194	0.389	2.3882903663707e-07
STEAP1	6.060517391263e-74	-4.24673	0.152	0.316	1.2121034782526e-70
LY6D	0	-4.24715	0.523	0.917	0
CYP1B1	5.33772300219498e-192	-4.25001	0.053	0.523	1.067544600439e-188
ARL14	0	-4.25069	0.127	0.599	0
GUCY1A3	6.444508203456e-60	-4.25341	0.162	0.495	1.2889016406912e-56
KLK13	0	-4.25388	0.051	0.673	0
KRTDAP	0	-4.25496	0.464	0.874	0
CLEC5A	1.18993624232769e-42	-4.25635	0.159	0.48	2.37987248465537e-39
RAMP3	0	-4.25754	0.276	0.727	0
ADAMTS2	1.38121414321747e-09	-4.26032	0.001	0.301	2.76242828643495e-06
CREB5	0	-4.26297	0.187	0.63	0
FBLN2	3.87709917741153e-14	-4.26403	0.228	0.382	7.75419835482305e-11
FCGR2B	7.77542961527684e-219	-4.26455	0.187	0.601	1.55508592305537e-215
MT1G	1.71581082349949e-48	-4.27077	0.081	0.451	3.43162164699898e-45
NREP	6.56016685888763e-167	-4.2736	0.172	0.544	1.31203337177753e-163
COL6A3	2.69300542059285e-25	-4.27604	0.078	0.279	5.38601084118569e-22
CDH13	0	-4.27763	0.025	0.561	0
EPPK1	1.09634344223958e-264	-4.28067	0.178	0.578	2.19268688447915e-261
APOC1	0	-4.28256	0.18	0.74	0
MAP1B	1.10114558415675e-11	-4.28457	0.17	0.38	2.2022911683135e-08
HCG22	1.4189867114066e-304	-4.28686	0.005	0.464	2.83797342281321e-301
MS4A4A	7.17075773870291e-217	-4.28704	0.11	0.554	1.43415154774058e-213
HCAR3	1.61314602957188e-106	-4.28919	0.249	0.328	3.22629205914376e-103
LILRB5	0	-4.29147	0.117	0.617	0
LTBP1	0	-4.29556	0.177	0.66	0
TREM1	4.7414314837646e-29	-4.29681	0.013	0.388	9.4828629675292e-26
PLA1A	2.74458698094657e-170	-4.3026	0.119	0.513	5.48917396189313e-167
RNASE6	6.05805790258038e-53	-4.31108	0.099	0.46	1.21161158051608e-49
PCAT19	2.01570539219028e-11	-4.31322	0.227	0.377	4.03141078438057e-08
INHBB	7.9745096315449e-57	-4.31712	0.055	0.454	1.59490192630898e-53
TCF23	2.40240689590939e-53	-4.32189	0.008	0.413	4.80481379181878e-50
MEOX2	3.31808738080608e-27	-4.32494	0.213	0.412	6.63617476161217e-24
PRSS3	0	-4.32968	0.103	0.676	0
LAMA4	2.35734524441999e-10	-4.32996	0.135	0.351	4.71469048883997e-07
NID2	3.89927018648923e-122	-4.33467	0.203	0.517	7.79854037297847e-119
CST3	0	-4.33595	0.191	0.934	0
MYL9	2.78177197296611e-133	-4.33743	0.239	0.577	5.56354394593222e-130
BGN	3.17848932976929e-95	-4.33761	0.104	0.483	6.35697865953859e-92
SBSN	0	-4.34586	0.285	0.773	0
COL15A1	6.99413967955576e-162	-4.35319	0.226	0.573	1.39882793591115e-158
C2CD4B	0	-4.36098	0.046	0.641	0
CSTA	0	-4.36366	0.524	0.913	0
AIF1	0	-4.36374	0.168	0.62	0
TNFSF18	0	-4.36527	0.067	0.584	0
S100A9	0	-4.37819	0.935	0.992	0
CALD1	0	-4.38256	0.121	0.723	0
NFIB	2.24588806467684e-71	-4.39658	0.079	0.479	4.49177612935368e-68
FAM26F	0	-4.39714	0.242	0.683	0
PKIB	1.95801851532708e-139	-4.39904	0.207	0.554	3.91603703065416e-136
OLFM1	1.00505895698662e-15	-4.40499	0.18	0.349	2.01011791397324e-12
HSD17B2	2.49777638042793e-33	-4.40808	0.006	0.385	4.99555276085587e-30
MS4A6A	0	-4.4093	0.205	0.656	0
FAM107A	0	-4.42401	0.095	0.56	0
CYR61	3.3669777929807e-60	-4.4288	0.158	0.497	6.73395558596139e-57
SPRR2D	0	-4.43324	0.253	0.719	0
LGMN	0	-4.43592	0.15	0.676	0
HEY1	6.90831595445977e-53	-4.43782	0.116	0.47	1.38166319089195e-49
COL5A2	4.55034893008919e-216	-4.44231	0.062	0.513	9.10069786017837e-213
TREM2	4.57904393357625e-11	-4.44255	0.096	0.399	9.1580878671525e-08
DAB2	1.14444481064125e-175	-4.44298	0.168	0.569	2.2888896212825e-172
IL6	0	-4.44396	0.212	0.653	0
ID4	0	-4.44493	0.072	0.607	0
CCL13	8.99471963517972e-99	-4.45035	0.224	0.569	1.79894392703594e-95
FSTL3	0	-4.45096	0.098	0.594	0
IL1RN	0	-4.47074	0.145	0.815	0
SDS	2.77536284161813e-191	-4.48778	0.188	0.557	5.55072568323625e-188
AEBP1	5.20018278186557e-140	-4.50788	0.092	0.487	1.04003655637311e-136
NEFM	3.14848978170482e-189	-4.51382	0.001	0.399	6.29697956340964e-186
MIR3945HG	9.87736320689311e-19	-4.51407	0.005	0.413	1.97547264137862e-15
PLVAP	2.44554773995108e-38	-4.51506	0.217	0.501	4.89109547990216e-35
SGCA	6.93849319541606e-37	-4.52139	0.104	0.319	1.38769863908321e-33
P3H2	1.46451121224089e-271	-4.52547	0.087	0.546	2.92902242448179e-268
LYNX1	0	-4.52592	0.214	0.669	0
SPINK5	0	-4.5277	0.213	0.793	0
CCL7	0	-4.53088	0.219	0.605	0
SLITRK4	3.73470096812428e-195	-4.53493	0.006	0.484	7.46940193624857e-192
SLURP1	6.48316618604228e-286	-4.53618	0.174	0.595	1.29663323720846e-282
C2	0	-4.53994	0.087	0.699	0
SCARA5	7.94307602672321e-133	-4.54536	0.003	0.38	1.58861520534464e-129
VWF	1.89542697895441e-270	-4.54712	0.159	0.578	3.79085395790882e-267
HGF	0	-4.54723	0.003	0.538	0
SPINK7	0	-4.55374	0.207	0.631	0
LGI3	2.91456379363579e-195	-4.5551	0.011	0.477	5.82912758727158e-192
SPRR1B	0	-4.56003	0.395	0.843	0
TMEM176B	1.30623654884063e-223	-4.56081	0.206	0.632	2.61247309768126e-220
GDNF	7.38501790094561e-43	-4.56708	0.002	0.273	1.47700358018912e-39
SPI1	0	-4.5712	0.24	0.699	0
SERPINA1	6.14294286157736e-56	-4.57558	0.039	0.439	1.22858857231547e-52
NDUFA4L2	0	-4.5763	0.257	0.825	0
FKBP10	7.39474729072791e-21	-4.57877	0.029	0.388	1.47894945814558e-17
SLCO2B1	0	-4.58028	0.08	0.626	0
PSORS1C2	4.20948050200182e-105	-4.59646	0.008	0.429	8.41896100400363e-102
HSPG2	1.5279032443831e-113	-4.59926	0.052	0.474	3.0558064887662e-110
SERPINB13	0	-4.60254	0.165	0.762	0
IL3RA	0	-4.60616	0.048	0.652	0
TMPRSS11E	1.86826352218888e-20	-4.61098	0.098	0.408	3.73652704437775e-17
CARMN	1.85436329994243e-14	-4.61376	0.004	0.368	3.70872659988485e-11
S100B	0	-4.62188	0.089	0.65	0
INHBA-AS1	0	-4.6247	0.002	0.519	0
MNDA	5.28164460996607e-102	-4.63063	0.131	0.517	1.05632892199321e-98
SPRR2A	0	-4.63585	0.349	0.8	0
FUT3	3.53136282758251e-27	-4.63668	0.004	0.401	7.06272565516503e-24
LOR	0	-4.63678	0.223	0.621	0
TNNC1	7.54572634421006e-09	-4.63792	0.186	0.382	1.50914526884201e-05
TNNT3	3.83877235540283e-130	-4.64399	0.08	0.501	7.67754471080566e-127
FMO2	4.86393962338894e-175	-4.64759	0.019	0.444	9.72787924677788e-172
COLEC12	0	-4.65074	0.06	0.555	0
WNT4	2.89307458335038e-28	-4.65807	0.036	0.426	5.78614916670075e-25
IGFBP7	0	-4.66977	0.193	0.686	0
FSTL1	9.63270406250508e-73	-4.67783	0.245	0.534	1.92654081250102e-69
LMO2	0	-4.67826	0.025	0.635	0
ESAM	8.48687996227923e-291	-4.69496	0.086	0.532	1.69737599245585e-287
CDH5	2.71831345544065e-259	-4.70209	0.183	0.545	5.43662691088131e-256
CXCL9	0	-4.70624	0.24	0.808	0
PILRA	0	-4.70669	0.109	0.56	0
ITIH5	4.47284847098238e-38	-4.71069	0.035	0.442	8.94569694196475e-35
NXN	0	-4.73192	0.034	0.779	0
CD68	0	-4.73605	0.193	0.646	0
TNFAIP6	3.45520607229871e-46	-4.73698	0.045	0.403	6.91041214459742e-43
P2RY13	0	-4.742	0.092	0.537	0
SPRR3	0	-4.74721	0.34	0.81	0
SCG5	6.62228905449921e-52	-4.75125	0.094	0.444	1.32445781089984e-48
CXCL8	1.35989511497502e-299	-4.76182	0.132	0.596	2.71979022995005e-296
SLAMF9	6.23650596987152e-47	-4.78023	0.003	0.411	1.2473011939743e-43
WNT5A	3.73455926310668e-08	-4.78318	0.1	0.425	7.46911852621337e-05
CLEC4A	0	-4.78684	0.039	0.594	0
TSPAN7	4.14009725791864e-29	-4.79314	0.025	0.281	8.28019451583728e-26
HAS2	9.90274071506043e-268	-4.79328	0.173	0.553	1.98054814301209e-264
MSRB3	3.72555560427028e-65	-4.79353	0.11	0.463	7.45111120854056e-62
CTGF	2.93897904813994e-116	-4.80777	0.169	0.525	5.87795809627988e-113
ADAMTS9	4.53431231665959e-71	-4.81372	0.003	0.403	9.06862463331918e-68
RUNX1T1	0	-4.81469	0.001	0.521	0
OLFML3	1.14310774101657e-280	-4.81569	0.045	0.512	2.28621548203313e-277
INSR	1.3867453446112e-100	-4.8211	0.044	0.492	2.77349068922239e-97
CRYBA2	3.11015170017591e-13	-4.82169	0.007	0.314	6.22030340035182e-10
COL1A1	1.68210230515656e-23	-4.82573	0.15	0.334	3.36420461031312e-20
TDO2	2.26353388553657e-13	-4.8306	0.002	0.371	4.52706777107314e-10
CALCRL	3.71553168088272e-185	-4.83069	0.163	0.545	7.43106336176544e-182
MT1H	7.92093474096404e-25	-4.83101	0.018	0.394	1.58418694819281e-21
G0S2	0	-4.84174	0.191	0.657	0
AKAP12	1.45947609317764e-174	-4.84689	0.165	0.54	2.91895218635528e-171
MS4A7	4.11193799424023e-181	-4.8646	0.16	0.564	8.22387598848046e-178
RP11-109J4.1	0	-4.86782	0.011	0.604	0
C11orf96	0	-4.87606	0.23	0.714	0
GNG11	0	-4.87673	0.146	0.604	0
NOS1AP	0	-4.88086	0.008	0.606	0
CKM	2.51991250377529e-38	-4.88716	0.019	0.397	5.03982500755057e-35
DDR2	0	-4.88789	0.038	0.605	0
C1QB	0	-4.88825	0.162	0.698	0
LILRA4	1.40244823007536e-221	-4.89043	0.122	0.526	2.80489646015072e-218
AMTN	9.53257162645308e-56	-4.89099	0.063	0.273	1.90651432529062e-52
ALOX5	2.29346134055264e-28	-4.8922	0.227	0.514	4.58692268110527e-25
ACVRL1	0	-4.89672	0.127	0.619	0
TMEM255B	0	-4.9098	0.083	0.572	0
CCDC80	4.52031832590437e-30	-4.91113	0.048	0.444	9.04063665180875e-27
RP11-350J20.12	1.24072477676984e-86	-4.91227	0.007	0.439	2.48144955353967e-83
SERPING1	0	-4.91628	0.224	0.871	0
APCDD1	1.75760965406794e-307	-4.91744	0.012	0.528	3.51521930813587e-304
SPRR2E	0	-4.91923	0.261	0.713	0
CD14	0	-4.92654	0.181	0.729	0
MME	1.31076549635723e-121	-4.92772	0.004	0.457	2.62153099271447e-118
CLDN5	3.03143533483925e-15	-4.93312	0.183	0.421	6.06287066967849e-12
C1QA	0	-4.95481	0.129	0.65	0
FCGR2A	4.25521203933121e-233	-4.96245	0.192	0.596	8.51042407866242e-230
CNFN	0	-4.96494	0.225	0.686	0
MPEG1	0	-4.9707	0.083	0.557	0
CD1E	2.26715905209657e-292	-4.97923	0.033	0.462	4.53431810419314e-289
GREM1	1.2093783514825e-34	-4.98539	0.177	0.333	2.418756702965e-31
SPARC	1.62026681991289e-198	-4.9882	0.093	0.542	3.24053363982578e-195
COL6A1	8.02708483191512e-07	-4.9896	0.054	0.384	0.00160541696638302
RCN3	2.95312929941425e-42	-5.00116	0.072	0.316	5.90625859882849e-39
FLG	3.59073802854214e-25	-5.00858	0.051	0.408	7.18147605708428e-22
FRZB	1.57107211214662e-17	-5.01886	0.201	0.457	3.14214422429324e-14
IGSF6	8.07381016635561e-128	-5.0246	0.241	0.604	1.61476203327112e-124
LILRB2	0	-5.0343	0.166	0.599	0
SMOC2	1.92668392288474e-32	-5.03465	0.027	0.403	3.85336784576949e-29
SERPINF1	0	-5.04972	0.09	0.599	0
MMP12	1.27704599347525e-09	-5.06143	0.243	0.491	2.55409198695049e-06
ADGRE2	2.72070292012665e-15	-5.06145	0.073	0.423	5.4414058402533e-12
CD163	0	-5.06182	0.02	0.522	0
OLR1	9.71600298666927e-07	-5.06797	0.013	0.311	0.00194320059733385
SDPR	2.47476655868464e-276	-5.0826	0.216	0.593	4.94953311736929e-273
EGFL6	3.99599369787725e-19	-5.09249	0.005	0.392	7.9919873957545e-16
TFPI	5.33275118050371e-272	-5.1013	0.052	0.501	1.06655023610074e-268
DCN	0	-5.11113	0.05	0.636	0
CCL2	0	-5.11288	0.212	0.682	0
CXCL12	1.64685993200281e-22	-5.12082	0.004	0.313	3.29371986400561e-19
IGHG3	3.95721906390314e-121	-5.13444	0.087	0.484	7.91443812780627e-118
MRAS	1.9448204264451e-138	-5.1354	0.061	0.498	3.8896408528902e-135
STC1	1.07941215772484e-110	-5.13856	0.218	0.558	2.15882431544969e-107
CSF1R	2.29344818502718e-304	-5.13901	0.08	0.562	4.58689637005436e-301
CTSG	2.68149645908745e-166	-5.14088	0.224	0.579	5.3629929181749e-163
TCHH	3.51159945252339e-179	-5.15245	0.122	0.531	7.02319890504678e-176
NTM	4.4634425103425e-145	-5.16079	0.035	0.44	8.926885020685e-142
CKMT2	3.39419589943223e-89	-5.17334	0.003	0.405	6.78839179886445e-86
PRRX1	4.33263051530853e-07	-5.17443	0.001	0.349	0.000866526103061705
CD34	8.84224857232284e-142	-5.19149	0.001	0.366	1.76844971446457e-138
EDN1	0	-5.19182	0.134	0.638	0
ADAMDEC1	3.25461689729923e-81	-5.19532	0.038	0.438	6.50923379459845e-78
S100A1	1.98493357846658e-05	-5.20292	0.001	0.325	0.0396986715693317
LAMP5	2.32208065806262e-237	-5.20293	0.05	0.52	4.64416131612525e-234
FCN3	1.41798060651996e-24	-5.20511	0.007	0.384	2.83596121303992e-21
ECSCR.1	3.19757478027116e-33	-5.20821	0.226	0.48	6.39514956054231e-30
ADGRF5	0	-5.21308	0.027	0.636	0
IL1B	0	-5.21354	0.108	0.63	0
CA9	9.45358909687968e-09	-5.21509	0.031	0.355	1.89071781937594e-05
ANGPTL2	0	-5.22042	0.203	0.66	0
CD300E	3.9077509780442e-231	-5.22069	0.181	0.57	7.81550195608839e-228
CCL19	4.07141952879792e-63	-5.22096	0.08	0.456	8.14283905759584e-60
MMRN2	4.65834414571791e-121	-5.2252	0.183	0.5	9.31668829143581e-118
TMEM176A	1.09404832266361e-306	-5.22606	0.087	0.575	2.18809664532721e-303
SPARCL1	5.1180546010514e-39	-5.22751	0.232	0.521	1.02361092021028e-35
KCNMA1	2.49749884933724e-60	-5.23054	0.091	0.321	4.99499769867447e-57
C1QC	8.00584426804956e-220	-5.23091	0.18	0.602	1.60116885360991e-216
CDH11	6.5231874851156e-62	-5.23706	0.003	0.271	1.30463749702312e-58
KCTD12	4.55250101567472e-62	-5.25751	0.236	0.522	9.10500203134944e-59
PDPN	0	-5.26097	0.07	0.574	0
SOD3	1.50728114070364e-13	-5.27344	0.18	0.469	3.01456228140727e-10
FLRT2	6.85415062624234e-84	-5.27674	0.063	0.468	1.37083012524847e-80
LGI2	3.47751612648444e-62	-5.28218	0	0.273	6.95503225296888e-59
MXRA8	5.21234497819932e-45	-5.28364	0.227	0.494	1.04246899563986e-41
PLA2G7	7.28303778669753e-44	-5.28735	0.173	0.49	1.45660755733951e-40
RP11-60L3.1	0	-5.28891	0.009	0.552	0
VIT	4.15512565602267e-16	-5.30704	0.005	0.302	8.31025131204535e-13
C5AR1	1.59418489754958e-52	-5.32685	0.151	0.47	3.18836979509916e-49
C15orf48	2.99607031382435e-238	-5.35109	0.197	0.61	5.99214062764869e-235
CCL8	5.50515163734535e-29	-5.35286	0.228	0.505	1.10103032746907e-25
IGLC2	0	-5.35588	0.276	0.729	0
LYZ	0	-5.37445	0.239	0.751	0
EMILIN1	1.44546418983201e-26	-5.38514	0.116	0.332	2.89092837966402e-23
CD1B	0	-5.39594	0.122	0.626	0
AQP1	0	-5.40461	0.149	0.622	0
GPC6	0	-5.40576	0.021	0.516	0
LILRB4	0	-5.40736	0.216	0.717	0
CYBB	0	-5.40784	0.102	0.626	0
ACTA1	1.08249446838602e-72	-5.4279	0.133	0.265	2.16498893677204e-69
SOX18	0	-5.45322	0.236	0.706	0
LUM	2.11674926145788e-263	-5.45545	0.083	0.545	4.23349852291576e-260
SFRP2	4.63339812596942e-31	-5.4607	0.073	0.29	9.26679625193883e-28
SNCG	1.21042189004594e-30	-5.48373	0.201	0.473	2.42084378009189e-27
LINC01272	1.14760708985493e-123	-5.48837	0.188	0.294	2.29521417970985e-120
PLD4	7.52443261197531e-195	-5.49161	0.089	0.526	1.50488652239506e-191
RAB42	2.15754204983028e-62	-5.50016	0.081	0.464	4.31508409966055e-59
RP11-734K21.3	2.93708762157555e-17	-5.51534	0.002	0.353	5.8741752431511e-14
A2M	0	-5.5231	0.078	0.616	0
ANPEP	2.0154580926672e-22	-5.54154	0.117	0.437	4.03091618533439e-19
C6orf15	1.31182008759151e-05	-5.54286	0.004	0.3	0.0262364017518303
HS3ST6	1.35151229243784e-115	-5.54461	0.009	0.449	2.70302458487569e-112
HAL	0	-5.54474	0.121	0.543	0
COMP	4.47181957886453e-61	-5.5756	0.001	0.253	8.94363915772905e-58
KDR	3.96436028760042e-18	-5.5803	0.095	0.379	7.92872057520084e-15
PLAC9	0	-5.59716	0.119	0.586	0
PMEL	8.08688059743313e-61	-5.60607	0.112	0.459	1.61737611948663e-57
MYOZ1	6.8958340131548e-210	-5.62512	0.01	0.407	1.37916680263096e-206
RP1-122P22.4	9.81362154094418e-50	-5.6277	0.004	0.412	1.96272430818884e-46
APOBEC3B	0	-5.62922	0.01	0.561	0
PMP22	2.10729816441232e-41	-5.63416	0.091	0.451	4.21459632882463e-38
TPSAB1	0	-5.68488	0.217	0.691	0
COL3A1	1.73957314130234e-19	-5.68574	0.041	0.374	3.47914628260467e-16
SSUH2	1.08213410815633e-22	-5.68771	0.004	0.367	2.16426821631266e-19
MRC1	5.01432807166977e-186	-5.69968	0.066	0.491	1.00286561433395e-182
F2RL3	0	-5.70443	0.003	0.464	0
C1S	0	-5.7064	0.074	0.767	0
AGT	1.79354340825198e-177	-5.71118	0.121	0.474	3.58708681650395e-174
IL20	8.79078350615485e-236	-5.71307	0.077	0.518	1.75815670123097e-232
MXRA5	3.51430539379614e-43	-5.71431	0.005	0.3	7.02861078759228e-40
IGF2	2.61363685856609e-77	-5.71553	0.001	0.272	5.22727371713219e-74
LYPD1	0	-5.72614	0.008	0.558	0
MS4A2	0	-5.73076	0.186	0.628	0
SELE	1.23666197326663e-295	-5.73565	0.197	0.611	2.47332394653325e-292
UBD	0	-5.74715	0.116	0.74	0
RAMP2	3.07302341637739e-75	-5.75348	0.156	0.484	6.14604683275478e-72
NTS	2.73581671439664e-252	-5.76379	0.213	0.57	5.47163342879328e-249
TINAGL1	1.07031283429934e-202	-5.76859	0.031	0.499	2.14062566859868e-199
CLDN11	9.32815054261813e-25	-5.76909	0.001	0.369	1.86563010852363e-21
GS1-600G8.5	2.37931783582071e-45	-5.78349	0.005	0.284	4.75863567164141e-42
TPSB2	0	-5.78516	0.31	0.804	0
COL4A1	0	-5.82278	0.161	0.678	0
MGP	0	-5.84471	0.242	0.646	0
PDK4	1.56795585425721e-14	-5.87349	0.011	0.311	3.13591170851442e-11
ITGBL1	5.41399496529856e-308	-5.8747	0.12	0.534	1.08279899305971e-304
SEMA3A	4.32560781058443e-76	-5.89641	0.003	0.431	8.65121562116887e-73
HLA-DQB2	0	-5.92203	0.06	0.627	0
PDGFRA	0	-5.93454	0.003	0.54	0
CPA3	0	-5.94112	0.245	0.75	0
CD93	4.42307554887613e-23	-5.94273	0.031	0.406	8.84615109775227e-20
EMCN	0	-5.94727	0.018	0.628	0
COL4A2	0	-5.94974	0.028	0.61	0
GUCY1A2	8.5781861699712e-36	-5.9762	0.001	0.33	1.71563723399424e-32
GJA4	0	-5.99528	0.009	0.534	0
AXL	0	-6.00113	0.195	0.627	0
C1QTNF1	3.48343029134698e-130	-6.01279	0.021	0.476	6.96686058269395e-127
PDZD2	0	-6.01792	0.005	0.573	0
PDGFRL	0	-6.03478	0.024	0.53	0
KRT3	9.66443703820110e-13	-6.04753	0.004	0.398	1.93288740764022e-09
TMEM47	3.88480991168229e-121	-6.04941	0.037	0.426	7.76961982336458e-118
WFDC1	1.71773015204377e-48	-6.06334	0.001	0.374	3.43546030408754e-45
HPGDS	0	-6.07326	0.102	0.645	0
LINC01127	6.10313616509461e-84	-6.08639	0.096	0.456	1.22062723301892e-80
ASPN	0	-6.09069	0.005	0.545	0
DCLK1	5.88683069155069e-49	-6.10134	0.004	0.283	1.17736613831014e-45
WISP1	0	-6.11979	0.006	0.622	0
THEM5	1.82495829088005e-250	-6.14852	0.067	0.54	3.64991658176011e-247
BMX	2.4626492264489e-05	-6.1768	0.001	0.361	0.0492529845289781
OLFML2B	9.87936792740386e-74	-6.19309	0.044	0.455	1.97587358548077e-70
ABCA8	2.44011646082204e-40	-6.20783	0.001	0.313	4.88023292164408e-37
VCAN	1.41987559581751e-27	-6.22093	0.006	0.411	2.83975119163502e-24
SCGB3A1	1.04864091872756e-14	-6.22768	0.045	0.355	2.09728183745512e-11
CPVL	6.47439747638214e-61	-6.24222	0.069	0.468	1.29487949527643e-57
IGFBP5	2.06796645784397e-194	-6.24494	0.019	0.494	4.13593291568795e-191
FCGR1A	3.98675534015418e-59	-6.24525	0.197	0.513	7.97351068030836e-56
NRN1	1.1859089825431e-69	-6.29161	0.127	0.481	2.37181796508621e-66
DUOXA2	2.75008707499298e-256	-6.32083	0.009	0.493	5.50017414998597e-253
NR2F2	2.54896971277874e-97	-6.34736	0.021	0.45	5.09793942555749e-94
LGALS2	0	-6.39483	0.122	0.676	0
PPP1R14A	1.43933149845349e-148	-6.43112	0.023	0.515	2.87866299690697e-145
LRRN4CL	8.84964514654746e-19	-6.45733	0.004	0.375	1.76992902930949e-15
APLN	0	-6.46461	0.008	0.643	0
CDH6	0	-6.46664	0.003	0.499	0
LINC01405	1.0782870053563e-283	-6.46937	0.097	0.537	2.1565740107126e-280
SHE	0	-6.48216	0.004	0.507	0
TEK	7.80956624370515e-14	-6.48316	0.002	0.349	1.56191324874103e-10
THBS4	3.81276616224761e-53	-6.48372	0.007	0.417	7.62553232449522e-50
FPR3	2.59665033529686e-22	-6.49595	0.154	0.45	5.19330067059373e-19
COL14A1	2.75391217986231e-306	-6.52643	0.005	0.458	5.50782435972463e-303
DKK1	2.11252984944323e-263	-6.53381	0.009	0.517	4.22505969888645e-260
CHI3L1	3.15939328253683e-57	-6.58902	0.094	0.461	6.31878656507366e-54
CLEC10A	0	-6.59842	0.121	0.602	0
FGF7	0	-6.61849	0.008	0.611	0
FOXS1	0	-6.62768	0.004	0.516	0
GGT5	2.14095401270239e-104	-6.62839	0.122	0.491	4.28190802540479e-101
FAM132B	0	-6.67103	0.004	0.587	0
CYTL1	2.19805858965217e-80	-6.68466	0.095	0.422	4.39611717930433e-77
FBN1	0	-6.70352	0.005	0.522	0
MECOM	1.19146724018915e-77	-6.74442	0.001	0.263	2.3829344803783e-74
RARRES2	3.7670541515095e-26	-6.77925	0.05	0.397	7.534108303019e-23
THSD7A	0	-6.81806	0.055	0.456	0
HTRA3	5.74584908911283e-302	-6.84505	0.072	0.546	1.14916981782257e-298
PPP1R3C	0	-6.90218	0.006	0.556	0
FCER1A	0	-6.93951	0.054	0.655	0
STXBP6	2.91980129101718e-88	-6.95509	0.095	0.467	5.83960258203437e-85
LMOD1	1.12085719166429e-188	-6.97062	0.003	0.463	2.24171438332857e-185
ANGPTL1	0	-6.97649	0.004	0.594	0
ENPP2	0	-6.99465	0.022	0.672	0
DUOX2	1.71155095410181e-242	-7.00594	0.01	0.504	3.42310190820362e-239
TNXB	3.62319714779136e-18	-7.00861	0.003	0.31	7.24639429558273e-15
SULF1	4.42805248854691e-72	-7.07137	0.003	0.267	8.85610497709382e-69
TIE1	2.38202583722983e-162	-7.07737	0.002	0.446	4.76405167445967e-159
SRPX	1.89144298794869e-05	-7.07948	0.093	0.35	0.0378288597589739
CLEC14A	0	-7.15225	0.004	0.555	0
MARCO	7.09082312694508e-35	-7.16201	0.017	0.282	1.41816462538902e-31
BARX1	6.10031092066003e-17	-7.16803	0	0.306	1.22006218413201e-13
HSPB7	8.70490470618748e-06	-7.17541	0.003	0.319	0.017409809412375
FAM110D	5.80597660072006e-95	-7.1925	0.003	0.291	1.16119532014401e-91
GDPD2	9.03251276761716e-101	-7.22459	0.006	0.458	1.80650255352343e-97
TM4SF18	7.63177438619733e-25	-7.22498	0.003	0.264	1.52635487723947e-21
ZNF812P	1.33935995045795e-247	-7.28165	0.097	0.54	2.67871990091591e-244
RHOJ	3.03335058470785e-39	-7.3183	0.003	0.384	6.0667011694157e-36
PRELP	0	-7.37295	0.003	0.517	0
ALPL	9.56563510637332e-18	-7.48828	0.002	0.344	1.91312702127466e-14
RARRES1	0	-7.50525	0.057	0.556	0
VMO1	4.02427714438011e-248	-7.5226	0.039	0.541	8.04855428876023e-245
WISP2	0	-7.55259	0.008	0.556	0
COL8A1	1.21011478974521e-63	-7.62879	0.003	0.406	2.42022957949042e-60
PTPRB	2.60394959214145e-74	-7.63648	0.125	0.45	5.20789918428291e-71
PCDH1	3.01348784482331e-260	-7.65062	0.004	0.502	6.02697568964662e-257
PID1	1.94096722698342e-31	-7.73247	0.002	0.402	3.88193445396684e-28
EPS8	3.12472017848661e-50	-7.78942	0.01	0.4	6.24944035697321e-47
KCNE4	6.33071749633212e-28	-7.87555	0.003	0.298	1.26614349926642e-24
SUCNR1	2.16620380110498e-205	-7.97075	0.005	0.487	4.33240760220996e-202
SPNS2	5.10053169817981e-14	-8.08781	0.002	0.37	1.02010633963596e-10
CD209	0	-8.09906	0.028	0.533	0
CD1A	2.44816008858229e-275	-8.1331	0.12	0.547	4.89632017716459e-272
PTX3	3.49971518893517e-24	-8.17793	0.004	0.375	6.99943037787034e-21
ASS1	2.65663260784924e-36	-8.18934	0.118	0.459	5.31326521569847e-33
JAM2	0	-8.33553	0.01	0.583	0
HSPB3	1.01344301375954e-103	-8.35956	0.005	0.466	2.02688602751909e-100
ADGRL4	1.28550016920151e-305	-8.69215	0.006	0.488	2.57100033840302e-302
KRT36	7.88919958463479e-99	-8.99061	0.119	0.46	1.57783991692696e-95
RETN	1.0599244923505e-161	-9.89953	0.01	0.4	2.119848984701e-158
