# Supplementary material for: TNFSF8 Drives Oral Squamous Cell Carcinoma Progression via CD8+ T Cell Regulation: Insights from Multi-Omics Integration and Single-Cell eQTL Analysis
Source: Research Square preprint supplement (doi:10.21203/rs.3.rs-7101139/v1), 2025-08-11
Supplement: Supplementary file 5 [file 551ba7c56158dbe58c48c54a.xlsx]

## Sheet: Sheet1
TableS2 Mendelian Randomization Analysis of deCODE cis-pQTL and OSCC: Preliminary Results
id	nsnp	method	beta	se	OR	OR_lci95	OR_uci95	pvalue
10714_7_ACE_ACE	93	MR Egger	0.0680801668803614	0.0839007421551185	1.07045111976597	0.9081322259012	1.26178277471774	0.419232109818426
10714_7_ACE_ACE	93	Weighted median	0.0917077739369023	0.0635932444727463	1.09604448251321	0.967601465931158	1.24153750272751	0.149274359866055
10714_7_ACE_ACE	93	Inverse variance weighted	0.0892171213828251	0.0434068602888632	1.09331801327667	1.00414825550789	1.19040616920721	0.0398433632242092
10714_7_ACE_ACE	93	Simple mode	0.0282527110330131	0.124003574801125	1.0286556041981	0.806707366384042	1.31166814156053	0.820277876568579
10714_7_ACE_ACE	93	Weighted mode	0.0784201787046657	0.0600346176174784	1.08157701883794	0.961512540087568	1.21663399998072	0.194724174025989
10815_2_HABP4_HABP4	33	MR Egger	0.550283623593874	0.267977748855719	1.73374467903747	1.02536355328586	2.93151692632159	0.0485458781330417
10815_2_HABP4_HABP4	33	Weighted median	0.402580942342181	0.169088063392495	1.49567998416655	1.07376196569676	2.08338410793387	0.0172706290511417
10815_2_HABP4_HABP4	33	Inverse variance weighted	0.412192903631869	0.123071397328536	1.51012571696868	1.18645867252122	1.92208943629208	0.000810400895243733
10815_2_HABP4_HABP4	33	Simple mode	0.322321026369376	0.277152493908013	1.38032782646867	0.801798570458745	2.37628873226054	0.253439682006275
10815_2_HABP4_HABP4	33	Weighted mode	0.408406308947355	0.235599868197593	1.50441829562108	0.948029714584498	2.38734543166866	0.0926386279268739
10818_36_SMPD1_ASM	42	MR Egger	0.280289136963792	0.177070989761697	1.32351243338636	0.935410318193534	1.87263827141776	0.121315486027443
10818_36_SMPD1_ASM	42	Weighted median	0.203990154357821	0.159397640885659	1.22628607982282	0.897242397791187	1.67599920965527	0.200631
10818_36_SMPD1_ASM	42	Inverse variance weighted	0.191236032881557	0.0970230899879966	1.2107451940347	1.00107134999092	1.4643351094719	0.0487197232189746
10818_36_SMPD1_ASM	42	Simple mode	0.245553649542257	0.241703572045433	1.2783288635095	0.795976710551595	2.05298052269528	0.315621131602911
10818_36_SMPD1_ASM	42	Weighted mode	0.201451728491018	0.129412469176027	1.22317719102894	0.94914214168899	1.5763312731969	0.12723663597918
11109_56_SVEP1_SVEP1	78	MR Egger	0.0912832112397943	0.097756186256961	1.0955792416805	0.90454889888383	1.32695299975748	0.353372397008477
11109_56_SVEP1_SVEP1	78	Weighted median	0.152640925089063	0.0964683047153515	1.16490661509619	0.964218883904606	1.40736449425223	0.113583166784111
11109_56_SVEP1_SVEP1	78	Inverse variance weighted	0.140084697128168	0.0614797308163023	1.15037122787052	1.01977745766121	1.29768897318768	0.0226937743918622
11109_56_SVEP1_SVEP1	78	Simple mode	0.105546822588115	0.184345237493521	1.11131813809611	0.774320163569013	1.59498365426634	0.568617637279561
11109_56_SVEP1_SVEP1	78	Weighted mode	0.144927796681882	0.0936174928477552	1.1559561033885	0.962171577433098	1.38876947137221	0.125702433868713
11178_21_SVEP1_SVEP1	81	MR Egger	0.0696195257784554	0.0952430396042565	1.07210019715749	0.8895346378314	1.29213499268253	0.466961763691732
11178_21_SVEP1_SVEP1	81	Weighted median	0.155447849987236	0.0913170869155267	1.16818101382394	0.976741116186357	1.39714286461793	0.0887016625423489
11178_21_SVEP1_SVEP1	81	Inverse variance weighted	0.190184145892288	0.0610059508468315	1.20947229650732	1.07316527466792	1.36309221938936	0.00182411278476757
11178_21_SVEP1_SVEP1	81	Simple mode	0.195178365404602	0.174313075960406	1.21552777525879	0.863747098169778	1.7105791447014	0.266192049099919
11178_21_SVEP1_SVEP1	81	Weighted mode	0.170403208126879	0.0893611234087009	1.18578287223373	0.995266644050807	1.41276815463243	0.0601227379276057
11187_11_CLEC12A_CL12A	160	MR Egger	-0.0909054	0.0484436172666718	0.913104114676957	0.830394110516699	1.00405230923567	0.0624280991841194
11187_11_CLEC12A_CL12A	160	Weighted median	-0.105732	0.0447620431293042	0.899665825080452	0.824098271538123	0.982162716234077	0.0181723223372048
11187_11_CLEC12A_CL12A	160	Inverse variance weighted	-0.0611865	0.028874918617096	0.940647763843003	0.888890368527872	0.995418835607619	0.0340887752227453
11187_11_CLEC12A_CL12A	160	Simple mode	-0.10096	0.0782666038484537	0.903968916518993	0.775410395578013	1.05384169040368	0.198939693458169
11187_11_CLEC12A_CL12A	160	Weighted mode	-0.10096	0.0487242500111997	0.903968916518993	0.821634332738297	0.994554109379945	0.0398730784132616
11212_7_TXNDC5_TXND5	20	MR Egger	-0.783095	0.342020824735092	0.456989318273424	0.233760994079777	0.893387871822351	0.0343420226674163
11212_7_TXNDC5_TXND5	20	Weighted median	-0.365629	0.25359016502731	0.693760018922909	0.422035478675777	1.14043247114224	0.149355606605945
11212_7_TXNDC5_TXND5	20	Inverse variance weighted	-0.41292	0.173658484151279	0.661715288244047	0.470814774370381	0.93001992828594	0.0174176971916341
11212_7_TXNDC5_TXND5	20	Simple mode	0.0463504777429704	0.429520969234718	1.04744145154923	0.451350706490085	2.4307785024984	0.91519689284987
11212_7_TXNDC5_TXND5	20	Weighted mode	-0.311996	0.303286195868466	0.731984768428739	0.403961170890587	1.3263693142349	0.316531610569842
11288_26_NT5C2_5NTC	10	MR Egger	1.05043750809809	0.61630102172155	2.85890163710498	0.854266139933886	9.56764898966271	0.126701673083831
11288_26_NT5C2_5NTC	10	Weighted median	0.707603147511365	0.34571190335861	2.02912191951157	1.0304625889744	3.99561886893945	0.040677718941548
11288_26_NT5C2_5NTC	10	Inverse variance weighted	0.656660260289502	0.254550508692163	1.92834140981183	1.1708632101744	3.17586252645279	0.0098890326306369
11288_26_NT5C2_5NTC	10	Simple mode	0.186314695725425	0.535450669591524	1.20480134655985	0.421823365947509	3.44112	0.73587105752423
11288_26_NT5C2_5NTC	10	Weighted mode	0.778317270468433	0.412274301951702	2.17780452446828	0.970697531422816	4.88600454133497	0.0916485811750336
11369_23_ADH5_ADHX	14	MR Egger	0.425741492050312	0.39444853741054	1.53072501939615	0.706538459786318	3.31633621999003	0.30165600805447
11369_23_ADH5_ADHX	14	Weighted median	0.464937986926739	0.255345589239046	1.59191546625565	0.965084740043655	2.62587806702789	0.0686344427371109
11369_23_ADH5_ADHX	14	Inverse variance weighted	0.577521798812399	0.194391634920455	1.78161774812282	1.21715259746783	2.60785854380934	0.00296910093216804
11369_23_ADH5_ADHX	14	Simple mode	0.539473738361431	0.347773753250244	1.71510403118527	0.867480003619892	3.39095059887614	0.144845034524426
11369_23_ADH5_ADHX	14	Weighted mode	0.412884907733028	0.279945904970071	1.51117109181821	0.873009303727752	2.6158232896212	0.164049764732543
11424_4_FAH_FAAA	49	MR Egger	-0.148884	0.0946851180584636	0.861669170197413	0.71571967313325	1.03738067673664	0.122563799293092
11424_4_FAH_FAAA	49	Weighted median	-0.158472	0.0909404622695267	0.853446675079795	0.714111959662131	1.01996783186403	0.0814047265860176
11424_4_FAH_FAAA	49	Inverse variance weighted	-0.181514	0.0721677796116974	0.834006837456006	0.724000984849901	0.960727152971446	0.0118977599731851
11424_4_FAH_FAAA	49	Simple mode	-0.109661	0.191960762027749	0.896137927188452	0.615140836573379	1.30549483435216	0.570483644010076
11424_4_FAH_FAAA	49	Weighted mode	-0.136236	0.0869663010941995	0.872637063326413	0.735879059747838	1.03481059041398	0.123793583409149
11656_110_EVL_EVL	14	MR Egger	-0.297746	0.725455762701344	0.742490061242517	0.179130786549673	3.07759208599825	0.688726868938629
11656_110_EVL_EVL	14	Weighted median	0.569038777981062	0.367490382222095	1.76656817084006	0.859639321616124	3.63031683608673	0.121515106865004
11656_110_EVL_EVL	14	Inverse variance weighted	0.654235573187366	0.283991899467891	1.92367144915157	1.10253431241924	3.35636886997289	0.0212388105363114
11656_110_EVL_EVL	14	Simple mode	0.505693369698277	0.575859805001601	1.65813482241075	0.536337394761304	5.12627147789079	0.395800877435306
11656_110_EVL_EVL	14	Weighted mode	0.440271100334738	0.475340916837319	1.55312821502159	0.611771093499337	3.94298991555536	0.371206757842498
12396_19_HIBCH_HIBCH	51	MR Egger	-0.162438	0.181309565018138	0.850068822625529	0.595827125179039	1.21279641805971	0.374678513193141
12396_19_HIBCH_HIBCH	51	Weighted median	-0.276548	0.141720095575185	0.758397297302719	0.574463177244036	1.00122424437265	0.0510134259523488
12396_19_HIBCH_HIBCH	51	Inverse variance weighted	-0.226178	0.0897058751828333	0.797575857296186	0.668979511195686	0.950891974262079	0.0116911353009125
12396_19_HIBCH_HIBCH	51	Simple mode	-0.148396	0.244975978980991	0.862089647951877	0.533365188598093	1.39341407537157	0.547415954755548
12396_19_HIBCH_HIBCH	51	Weighted mode	-0.256822	0.123679881837973	0.77350569635225	0.606994946691201	0.985693646299433	0.0430067352219107
12411_60_MAX_MAX	13	MR Egger	-0.059098	0.599030401121548	0.942614354289768	0.29135942910863	3.04957290598562	0.923186141065025
12411_60_MAX_MAX	13	Weighted median	-0.733684	0.251823150644707	0.480136872862826	0.293095308113555	0.786540795095831	0.00357414044429804
12411_60_MAX_MAX	13	Inverse variance weighted	-0.727169	0.248339044511586	0.483275332482248	0.297032633699344	0.786294233320609	0.00341008604037586
12411_60_MAX_MAX	13	Simple mode	-1.40661	0.512071540601646	0.244972349048212	0.0897910337614347	0.66834570540354	0.0177036099645914
12411_60_MAX_MAX	13	Weighted mode	-0.620268	0.273130111524173	0.537800521893664	0.314867745677643	0.918574243692799	0.0423644893562319
12436_84_GSTO1_GST_omega_1	106	MR Egger	0.242590972776325	0.0750099001040486	1.27454719298618	1.10028756522639	1.47640544025842	0.00163586181967602
12436_84_GSTO1_GST_omega_1	106	Weighted median	0.178200046711474	0.0645314506466972	1.19506436602036	1.05307915729269	1.35619324439322	0.0057546221928382
12436_84_GSTO1_GST_omega_1	106	Inverse variance weighted	0.117319338300019	0.0443565030601218	1.12447846140147	1.03084679165728	1.22661468259795	0.00817105798239224
12436_84_GSTO1_GST_omega_1	106	Simple mode	0.0996415835620672	0.111239248967616	1.10477487762983	0.888351887821943	1.37392349470263	0.372439908860355
12436_84_GSTO1_GST_omega_1	106	Weighted mode	0.188844353206683	0.0526541302742063	1.20785293941465	1.08941652839521	1.33916521846946	0.000510474873870687
12450_42_PMVK_PMVK	9	MR Egger	-0.105902	0.588780806619031	0.899512824985759	0.283678890216219	2.85225073214701	0.86235340011587
12450_42_PMVK_PMVK	9	Weighted median	0.600149877075131	0.335743325188668	1.82239191469313	0.943737672935263	3.51910534673199	0.0738525358525762
12450_42_PMVK_PMVK	9	Inverse variance weighted	0.601709134907829	0.27548119403923	1.82523571008931	1.06371340091257	3.13193891750083	0.0289467255132605
12450_42_PMVK_PMVK	9	Simple mode	0.516818215851448	0.48530910692754	1.67668430597672	0.64766115151462	4.34064982179985	0.317992485264631
12450_42_PMVK_PMVK	9	Weighted mode	0.516818215851448	0.439385889614065	1.67668430597672	0.708660912994342	3.96701752609723	0.273315851472962
12524_18_SAT2_SAT2	30	MR Egger	0.0373838744699182	0.288000576317914	1.03809144116327	0.590316021917073	1.82552023019261	0.897648843545607
12524_18_SAT2_SAT2	30	Weighted median	-0.276005	0.165474562589095	0.758809341418167	0.548627884721626	1.04951212407957	0.0953239329245871
12524_18_SAT2_SAT2	30	Inverse variance weighted	-0.442576	0.144436766961087	0.642379205891137	0.48399894620657	0.85258665828832	0.00218286567249016
12524_18_SAT2_SAT2	30	Simple mode	-0.333714	0.279070878164003	0.716258828932464	0.414495730167737	1.23771289469277	0.241460118641161
12524_18_SAT2_SAT2	30	Weighted mode	-0.2891	0.162865955621902	0.748937336900966	0.544265970997632	1.0305754254233	0.0863828241703246
12558_3_UBASH3B_UBS3B	4	MR Egger	0.585101340484312	1.21662839136532	1.79517290011321	0.165383161450238	19.4859362527699	0.678044621951376
12558_3_UBASH3B_UBS3B	4	Weighted median	0.894661444686669	0.381721309091854	2.4465073711679	1.15776066580701	5.16980624230036	0.0190906779503795
12558_3_UBASH3B_UBS3B	4	Inverse variance weighted	0.700844913941814	0.325217306678814	2.01545487419932	1.06547317136188	3.8124454553292	0.0311614448880389
12558_3_UBASH3B_UBS3B	4	Simple mode	1.04500410430096	0.598006747394666	2.84341019383902	0.880655184587849	9.1806437660518	0.178879922750772
12558_3_UBASH3B_UBS3B	4	Weighted mode	1.06340924214113	0.462652667659659	2.89622812000486	1.16953942039985	7.17217152051109	0.105132448562189
12563_2_TNFAIP8_TFIP8	19	MR Egger	-0.288562	0.371307447372233	0.749340133398537	0.361922608492454	1.55146603816944	0.447749269888988
12563_2_TNFAIP8_TFIP8	19	Weighted median	-0.324394	0.219838011417005	0.72296548547275	0.469880769547032	1.11236536385329	0.140050295580162
12563_2_TNFAIP8_TFIP8	19	Inverse variance weighted	-0.340254	0.16211941558447	0.711589222050974	0.517881657147744	0.977750831585553	0.0358354922824396
12563_2_TNFAIP8_TFIP8	19	Simple mode	-0.28468	0.336016139504361	0.752255167222326	0.389352051513028	1.45340915609316	0.407996421794576
12563_2_TNFAIP8_TFIP8	19	Weighted mode	-0.30184	0.243170198391495	0.739456404886123	0.4591154664957	1.19097659440805	0.230439320329348
12571_14_ARL3_ARL3	11	MR Egger	0.473540176533455	0.370895193652562	1.60566849319941	0.776146177846409	3.3217599772339	0.233647245417419
12571_14_ARL3_ARL3	11	Weighted median	0.58493519034537	0.245364708362117	1.79487465666372	1.10962304878083	2.90330579981492	0.0171283098729284
12571_14_ARL3_ARL3	11	Inverse variance weighted	0.412999853024692	0.187588051677786	1.51134480380361	1.04637025128703	2.18293965560915	0.0276913152688716
12571_14_ARL3_ARL3	11	Simple mode	0.552289903360101	0.390905828950809	1.73722654754007	0.80744081443934	3.73768085970928	0.188060532154485
12571_14_ARL3_ARL3	11	Weighted mode	0.508187888912652	0.270012059374324	1.6622762348542	0.979183960603346	2.82190312763953	0.0892158740664213
12727_7_PTGFRN_FPRP	102	MR Egger	-0.0872206	0.059213160935219	0.916474865218071	0.816050994868002	1.02925697518737	0.143893308016469
12727_7_PTGFRN_FPRP	102	Weighted median	-0.162452	0.06272698203625	0.850056577598423	0.751715572510231	0.961262758872152	0.00960226718330772
12727_7_PTGFRN_FPRP	102	Inverse variance weighted	-0.121761	0.0389124339953423	0.885360052321227	0.820345858851459	0.9555267620217	0.00175342919573911
12727_7_PTGFRN_FPRP	102	Simple mode	0.0114123304085667	0.113249251340232	1.01147769948574	0.810133522572766	1.26286236533938	0.919931387677989
12727_7_PTGFRN_FPRP	102	Weighted mode	-0.124525	0.0539002290928945	0.882916060210723	0.794398865822607	0.981296427923274	0.0229060832541964
12859_33_ECI2_PECI	45	MR Egger	0.200114807161409	0.152377291232031	1.22154299199354	0.90615520138471	1.64670166767054	0.196051940984688
12859_33_ECI2_PECI	45	Weighted median	0.154867645313634	0.126921274547399	1.16750342632883	0.910375567750802	1.49725486796309	0.222394124967985
12859_33_ECI2_PECI	45	Inverse variance weighted	0.200928881269034	0.0843733910647956	1.22253782339297	1.03619674569828	1.44238894382866	0.0172458141241348
12859_33_ECI2_PECI	45	Simple mode	0.104967565252403	0.216372640971542	1.11067458532164	0.726786286436932	1.69733256873504	0.629995097913377
12859_33_ECI2_PECI	45	Weighted mode	0.153540633081086	0.128897195335938	1.16595516251026	0.90565406752406	1.50107142421487	0.239966506543609
13088_397_BTC_BTC	12	MR Egger	-0.404211	0.462515061724847	0.667503553627092	0.269620440236575	1.65254901933193	0.40265069682776
13088_397_BTC_BTC	12	Weighted median	0.24437496504885	0.250443969502216	1.27682300474113	0.781535101036363	2.08599330122772	0.32917993306756
13088_397_BTC_BTC	12	Inverse variance weighted	0.550773259703405	0.207667118258048	1.73459379089799	1.15459046797688	2.60595917156152	0.00799708356430873
13088_397_BTC_BTC	12	Simple mode	0.203835613894514	0.372923086013628	1.22609658364669	0.590318159113463	2.54661458269852	0.595574344713715
13088_397_BTC_BTC	12	Weighted mode	0.27401064830266	0.277603939743373	1.31522880711857	0.763308447169821	2.26622254933552	0.344829376678823
13112_179_FSTL1_FSTL1	10	MR Egger	0.863336178646698	0.734375497373499	2.37105778568105	0.562120074505769	10.0012706857724	0.273550831124359
13112_179_FSTL1_FSTL1	10	Weighted median	0.432663390801653	0.275236720820096	1.54135729832395	0.898704873045073	2.64356229987568	0.115957910968905
13112_179_FSTL1_FSTL1	10	Inverse variance weighted	0.551192631240013	0.218970504877293	1.73532138271645	1.1297658983733	2.66545512273723	0.011829154287363
13112_179_FSTL1_FSTL1	10	Simple mode	0.418665223463248	0.440786295406669	1.5199314322263	0.640647487050645	3.60602609916562	0.36701324621102
13112_179_FSTL1_FSTL1	10	Weighted mode	0.386871351665865	0.307824557872745	1.47236706151879	0.805360897812812	2.69179292132623	0.240466445449385
13125_45_VTN_Vitronectin	124	MR Egger	0.15203246818412	0.0444940985090188	1.16419803521464	1.06697125838066	1.27028451286931	0.000861116198294994
13125_45_VTN_Vitronectin	124	Weighted median	0.0968144475379487	0.0349742572105079	1.10165593968305	1.02866814602669	1.17982248612124	0.00563732395635373
13125_45_VTN_Vitronectin	124	Inverse variance weighted	0.0907197358125522	0.0236499601871245	1.09496208359225	1.04536469383064	1.14691262444619	0.000125086935532786
13125_45_VTN_Vitronectin	124	Simple mode	0.0185419177981654	0.0728541586295191	1.0187148865596	0.883157051331778	1.17507981002155	0.799528648013146
13125_45_VTN_Vitronectin	124	Weighted mode	0.116438240684055	0.0367036473444648	1.12348812246663	1.04550402727622	1.20728904757258	0.00190955908755929
13388_57_PCSK1_NEC1	111	MR Egger	-0.0430905	0.081622574936533	0.957824662238828	0.816220459590511	1.12399545100007	0.598624956933342
13388_57_PCSK1_NEC1	111	Weighted median	-0.0903535	0.0709952891675057	0.91360817850294	0.794927586263674	1.05000747017805	0.203135599963612
13388_57_PCSK1_NEC1	111	Inverse variance weighted	-0.0945412	0.0436939194760062	0.909790290331954	0.835118842103157	0.991138423242591	0.0304862866674383
13388_57_PCSK1_NEC1	111	Simple mode	-0.178519	0.132182395824352	0.836508062622407	0.64558614952976	1.08389211779401	0.17961110389965
13388_57_PCSK1_NEC1	111	Weighted mode	-0.0616454	0.0687330871245036	0.940216232231361	0.821714517428959	1.07580740585828	0.371741150131538
13405_61_SPINK2_ISK2	45	MR Egger	-0.396823	0.14652686364981	0.672452963374413	0.504586616738094	0.896165242895732	0.00967005649060418
13405_61_SPINK2_ISK2	45	Weighted median	-0.228067	0.121357100068515	0.796070690668684	0.627552964574047	1.00984073108771	0.0602025391643844
13405_61_SPINK2_ISK2	45	Inverse variance weighted	-0.166497	0.0843613238900464	0.846625042414802	0.717598135724035	0.998851483526588	0.048424731408978
13405_61_SPINK2_ISK2	45	Simple mode	-0.297185	0.188723639495999	0.742906557960707	0.513203237008897	1.07542219935658	0.12248720499904
13405_61_SPINK2_ISK2	45	Weighted mode	-0.245027	0.134068556728725	0.782683727488891	0.601817545724463	1.0179062103257	0.0743926450659613
13427_66_MAN1C1_MA1C1	12	MR Egger	0.299984575928979	0.286019234659728	1.34983798741845	0.770578980465563	2.36453710582276	0.318944914528117
13427_66_MAN1C1_MA1C1	12	Weighted median	0.300213486654151	0.187117951161555	1.35014701517955	0.935627644253777	1.94831456059866	0.108624208962499
13427_66_MAN1C1_MA1C1	12	Inverse variance weighted	0.299848582825278	0.146612108666454	1.34965443124252	1.01256716119085	1.79895927261781	0.0408368261705026
13427_66_MAN1C1_MA1C1	12	Simple mode	0.276765684276233	0.225255523276037	1.31885730582279	0.848118305816675	2.05087495599716	0.244832004821784
13427_66_MAN1C1_MA1C1	12	Weighted mode	0.276765684276233	0.18848481391218	1.31885730582279	0.911499210524469	1.90826779994832	0.170009756123127
13676_46_INHBB_Inhibin_bB_chain	23	MR Egger	-0.174679	0.18845932242935	0.839726218845621	0.580387298545472	1.2149475434489	0.364519092322095
13676_46_INHBB_Inhibin_bB_chain	23	Weighted median	-0.151587	0.12855217410876	0.859342950911244	0.667944993723777	1.10558551111206	0.238323288589422
13676_46_INHBB_Inhibin_bB_chain	23	Inverse variance weighted	-0.217117	0.104113200052916	0.80483618327477	0.656273016182268	0.98703019312986	0.0370340052498368
13676_46_INHBB_Inhibin_bB_chain	23	Simple mode	-0.0581376	0.246200142323838	0.943520079991941	0.582346346655706	1.52869533132715	0.815508857508712
13676_46_INHBB_Inhibin_bB_chain	23	Weighted mode	-0.138	0.131075009053851	0.871099082834886	0.673742984933998	1.1262656963918	0.303846320611864
13700_10_ANXA2_annexin_II	114	MR Egger	0.0438309063646215	0.0830175801148867	1.04480566996172	0.887911191413671	1.22942350376973	0.598563700003477
13700_10_ANXA2_annexin_II	114	Weighted median	0.0715190267531584	0.0776844798158423	1.07413858787666	0.922431137374842	1.25079657355149	0.35724118607396
13700_10_ANXA2_annexin_II	114	Inverse variance weighted	0.161859992762716	0.0483905306070414	1.17569562390126	1.0693110395021	1.29266429410866	0.000823213995336931
13700_10_ANXA2_annexin_II	114	Simple mode	0.0356919821363437	0.152836321311243	1.03633658714306	0.76807552745175	1.39829155267388	0.815771819296945
13700_10_ANXA2_annexin_II	114	Weighted mode	0.0909659616650931	0.0715018019011672	1.09523172475974	0.952012065847819	1.2599971932624	0.205907046687504
13748_4_CCL8_MCP_2	156	MR Egger	0.0741513575457661	0.056289967200854	1.07696980066653	0.964469588317282	1.2025925603018	0.189691206766335
13748_4_CCL8_MCP_2	156	Weighted median	0.0939525102606843	0.0542098158362931	1.09850757683998	0.987776591488944	1.22165164347118	0.0830730499351186
13748_4_CCL8_MCP_2	156	Inverse variance weighted	0.0774405601323394	0.036488772096967	1.08051800470253	1.00594013989661	1.16062488430608	0.0338115435768701
13748_4_CCL8_MCP_2	156	Simple mode	0.0504558887707267	0.105909583159686	1.05175046832569	0.854595608691874	1.29438887395705	0.634456526067662
13748_4_CCL8_MCP_2	156	Weighted mode	0.0838245202912757	0.0550026346285686	1.08743805375211	0.97630460733634	1.21122189925382	0.129544134160724
14091_42_CBR3_Carbonyl_reductase_3	42	MR Egger	-0.394813	0.125337484593012	0.673805796699292	0.527042117198108	0.861438273812395	0.00308643781680188
14091_42_CBR3_Carbonyl_reductase_3	42	Weighted median	-0.334434	0.10489392619433	0.71574307997929	0.582733043658505	0.879112935353728	0.00143108677751029
14091_42_CBR3_Carbonyl_reductase_3	42	Inverse variance weighted	-0.330291	0.0751943750101114	0.718714212667998	0.620225315911696	0.832842688357022	1.12053348396045e-05
14091_42_CBR3_Carbonyl_reductase_3	42	Simple mode	-0.228571	0.202519543454934	0.795669841604464	0.534988912711425	1.18337124713529	0.265612113549269
14091_42_CBR3_Carbonyl_reductase_3	42	Weighted mode	-0.327542	0.0905665121634394	0.720693210997879	0.603474133033703	0.860680973627458	0.000810092417347783
14133_93_IL1R2_IL_1_sRII	69	MR Egger	0.15555943100876	0.147334955879116	1.16831136792717	0.875275064571961	1.55945428777337	0.294842069425355
14133_93_IL1R2_IL_1_sRII	69	Weighted median	0.111238055063685	0.0989705634445169	1.11766094003419	0.92058655778364	1.35692398103828	0.261033851043575
14133_93_IL1R2_IL_1_sRII	69	Inverse variance weighted	0.147188719316533	0.0666484219845235	1.15857258742674	1.01669565252678	1.32024803784762	0.0272139522046295
14133_93_IL1R2_IL_1_sRII	69	Simple mode	-0.00718939	0.181762718809812	0.992836388208404	0.695277437429192	1.41774209932002	0.968564815930446
14133_93_IL1R2_IL_1_sRII	69	Weighted mode	0.0745972463417397	0.127832507173764	1.07745011651002	0.838656168396198	1.38423682709863	0.561450659184692
14151_4_ISG15_UCRP	28	MR Egger	-0.0218362	0.154435594859577	0.978400517462551	0.722867070723641	1.32426501543734	0.888649069850708
14151_4_ISG15_UCRP	28	Weighted median	-0.212886	0.141153931556232	0.808248500138902	0.612903716987662	1.06585360778606	0.131508135445511
14151_4_ISG15_UCRP	28	Inverse variance weighted	-0.212074	0.0938442350598499	0.808905176937495	0.673001123650872	0.972253332545283	0.0238307707841069
14151_4_ISG15_UCRP	28	Simple mode	0.000224967829541178	0.279252393159783	1.0002249931367	0.578619767440867	1.72902844526057	0.999363141132705
14151_4_ISG15_UCRP	28	Weighted mode	-0.126718	0.123255271573508	0.880982243374868	0.691910864205422	1.12171921745023	0.313029067342949
14271_23_RAB6B_RAB6B	11	MR Egger	0.285701657032607	0.346112665126976	1.33069539241271	0.67524535408878	2.62238046758277	0.430447348547979
14271_23_RAB6B_RAB6B	11	Weighted median	0.448873548938525	0.218098628987132	1.56654655319998	1.02163086339812	2.40210842415243	0.0395784401695121
14271_23_RAB6B_RAB6B	11	Inverse variance weighted	0.364226415655784	0.177473744295352	1.43940007997914	1.01651272945572	2.03821607955004	0.0401421303394601
14271_23_RAB6B_RAB6B	11	Simple mode	0.627636772557586	0.420033515191241	1.87317859737054	0.822317325869232	4.26696355198168	0.165977592134636
14271_23_RAB6B_RAB6B	11	Weighted mode	0.475546752568736	0.216963890823772	1.60889362377121	1.05158392397775	2.46156168194371	0.053171585059773
14708_59_C8G_CO8G	76	MR Egger	-0.203355	0.142752682436595	0.815988371649464	0.616837024289477	1.07943751177081	0.158497417810956
14708_59_C8G_CO8G	76	Weighted median	-0.175256	0.127738379429511	0.839242079871956	0.653362414779812	1.07800395721442	0.170065817020684
14708_59_C8G_CO8G	76	Inverse variance weighted	-0.165996	0.0812752086604245	0.847049838168381	0.722314128111284	0.99332603422446	0.0411127733013933
14708_59_C8G_CO8G	76	Simple mode	-0.262095	0.259453695642975	0.769437642511742	0.462723956565691	1.27945458045455	0.315656260401193
14708_59_C8G_CO8G	76	Weighted mode	-0.262095	0.124335178566928	0.769437642511742	0.603027598075213	0.981769802250716	0.0383742722643584
15305_7_SCGN_Secretagogin	4	MR Egger	4.02942086464803	3.59412326031085	56.228337997561	0.0490428572415589	64466.5945622924	0.378776721044391
15305_7_SCGN_Secretagogin	4	Weighted median	1.50662929766552	0.580351926665706	4.51149821891926	1.4464894058246	14.0710440721884	0.00942991829380264
15305_7_SCGN_Secretagogin	4	Inverse variance weighted	1.30263461626886	0.465689623586326	3.67897660217237	1.47680792936397	9.16494865054046	0.00515450092123333
15305_7_SCGN_Secretagogin	4	Simple mode	1.46859191237745	0.892655836092239	4.3431153465077	0.755018122761684	24.9830439090328	0.198480074030847
15305_7_SCGN_Secretagogin	4	Weighted mode	1.60889683961938	0.649263231777928	4.9972953676939	1.39981614827181	17.8401720988904	0.0894254138478179
15316_262_TXNL4B_TXN4B	12	MR Egger	0.343515100769673	0.456799229409459	1.40989481281895	0.575905675866076	3.45161276666431	0.46937837968135
15316_262_TXNL4B_TXN4B	12	Weighted median	0.596081966497238	0.297173992425264	1.81499364529759	1.01371412898571	3.24963600513955	0.0448738653577356
15316_262_TXNL4B_TXN4B	12	Inverse variance weighted	0.538798779277954	0.214982255823638	1.7139467967272	1.12460690617593	2.61212482857711	0.0122020113414611
15316_262_TXNL4B_TXN4B	12	Simple mode	0.930559410818716	0.507890909366412	2.53592740612115	0.937154828806853	6.86218286609473	0.0941077576626692
15316_262_TXNL4B_TXN4B	12	Weighted mode	0.637499903317923	0.36418850401712	1.89174541577588	0.926529341516161	3.86247964069107	0.107839210173559
15333_11_SDF2_SDF2	22	MR Egger	0.564231984444387	0.326676684179984	1.75809701822586	0.92676586646922	3.33515209971032	0.0995471142320562
15333_11_SDF2_SDF2	22	Weighted median	0.402018937363296	0.183753075761735	1.49483964072935	1.04275151696813	2.14293195946906	0.028682604161878
15333_11_SDF2_SDF2	22	Inverse variance weighted	0.478960040909042	0.133290771281668	1.61439462452809	1.24322664027834	2.09637560784707	0.000326456923200109
15333_11_SDF2_SDF2	22	Simple mode	0.23149011663946	0.355371584932517	1.2604768687687	0.628111117275892	2.5294918255731	0.521851782597091
15333_11_SDF2_SDF2	22	Weighted mode	0.408239612108904	0.199225	1.5041675347486	1.01791642145725	2.22269719291162	0.0531489111297543
15447_45_SORD_Sorbitol_dehydrogenase	29	MR Egger	-0.291944	0.301748163499676	0.746810450203609	0.413387332449085	1.34916047192135	0.341877146839708
15447_45_SORD_Sorbitol_dehydrogenase	29	Weighted median	-0.537533	0.211379230276333	0.584187706876915	0.386031532185718	0.884060623063097	0.010991185215115
15447_45_SORD_Sorbitol_dehydrogenase	29	Inverse variance weighted	-0.48595	0.162725157914792	0.61511241757212	0.44713641829195	0.846192058559569	0.0028235223339587
15447_45_SORD_Sorbitol_dehydrogenase	29	Simple mode	-0.95923	0.367634270525296	0.383187806068611	0.186412517513051	0.78767722617874	0.0144030290709378
15447_45_SORD_Sorbitol_dehydrogenase	29	Weighted mode	-0.566538	0.210571106709424	0.567486859043369	0.375590037992713	0.857427787243805	0.011894024495128
15480_2_VNN2_VNN2	103	MR Egger	0.160155243628906	0.0657530446605321	1.17369306521986	1.03177361335851	1.33513339894509	0.0166145653578282
15480_2_VNN2_VNN2	103	Weighted median	0.0845008024963811	0.065909597551557	1.08817371748712	0.956301529050302	1.23823083353813	0.199817640579307
15480_2_VNN2_VNN2	103	Inverse variance weighted	0.105198988838774	0.0422973314835906	1.11093165136189	1.02254663748909	1.2069563272226	0.0128778102314517
15480_2_VNN2_VNN2	103	Simple mode	0.252724223780189	0.133954085002692	1.28752815822187	0.99022233245991	1.67409752726549	0.0620515709245616
15480_2_VNN2_VNN2	103	Weighted mode	0.121005664189509	0.0578604367190024	1.12863130513084	1.00762815548202	1.26416537290186	0.0389820617411375
15483_377_AGRN_Agrin	27	MR Egger	0.210919896106256	0.23717358815214	1.23481343773521	0.775738083781584	1.96556577263615	0.382316348015726
15483_377_AGRN_Agrin	27	Weighted median	0.310996726322347	0.167236989696976	1.3647847533135	0.983352355936105	1.89417090591485	0.0629397516644927
15483_377_AGRN_Agrin	27	Inverse variance weighted	0.354622613448514	0.109895685411327	1.42564253442855	1.14938506128874	1.76829915789316	0.0012513828615164
15483_377_AGRN_Agrin	27	Simple mode	0.223655804903237	0.249031596837691	1.25064048101663	0.767631003951705	2.03756961965532	0.377373059591982
15483_377_AGRN_Agrin	27	Weighted mode	0.303137504008237	0.171575750753184	1.35410064590802	0.967392503767611	1.89539256517639	0.0890031342643279
15495_9_FOLR3_FOLR3	85	MR Egger	-0.0387254	0.0449541235413155	0.962014794884563	0.880878537651458	1.05062437784467	0.391475570875577
15495_9_FOLR3_FOLR3	85	Weighted median	-0.0300575	0.0473351189082717	0.970389704857455	0.884410140903351	1.06472793078957	0.525432134114921
15495_9_FOLR3_FOLR3	85	Inverse variance weighted	-0.06822	0.0318054886350231	0.934054964805082	0.877604930931758	0.994136024681093	0.031959834782419
15495_9_FOLR3_FOLR3	85	Simple mode	-0.0767099	0.0737062986019076	0.92615853831818	0.801577036163073	1.07010255958126	0.30097777069816
15495_9_FOLR3_FOLR3	85	Weighted mode	-0.0314332	0.0426274192417875	0.969055716815676	0.891381376446377	1.05349854406526	0.462938097860216
15544_25_KLK14_kallikrein_14	44	MR Egger	-0.409605	0.191652135871037	0.66391260355213	0.456008902955925	0.96660381474607	0.0384464471835194
15544_25_KLK14_kallikrein_14	44	Weighted median	-0.217951	0.137665243699775	0.804164854445202	0.613991087980024	1.05324185608686	0.113376922336335
15544_25_KLK14_kallikrein_14	44	Inverse variance weighted	-0.192037	0.093784529203828	0.825275930409339	0.68670178449605	0.991813880042302	0.040594728501941
15544_25_KLK14_kallikrein_14	44	Simple mode	-0.20802	0.244913172667927	0.812190590392763	0.502555062690319	1.31259956190916	0.400383384428653
15544_25_KLK14_kallikrein_14	44	Weighted mode	-0.275903	0.203134847417783	0.75888634982037	0.509641597418056	1.13002646342322	0.181475579908233
15570_99_CR2_Complement_receptor_type_2	36	MR Egger	0.0509296696870774	0.313387323356297	1.05224888568734	0.569321781227694	1.94481882467699	0.871863533789754
15570_99_CR2_Complement_receptor_type_2	36	Weighted median	-0.306837	0.188940329337919	0.735770475314528	0.508057774477242	1.06554454934104	0.104378103605401
15570_99_CR2_Complement_receptor_type_2	36	Inverse variance weighted	-0.273282	0.129630917780501	0.760878	0.590161917005498	0.980978097443718	0.035017799210362
15570_99_CR2_Complement_receptor_type_2	36	Simple mode	-0.317042	0.35350594839903	0.72830041728208	0.364250553747788	1.45619956471095	0.375926883885241
15570_99_CR2_Complement_receptor_type_2	36	Weighted mode	-0.304489	0.252926374634418	0.737499840582875	0.449227831006524	1.21075760965457	0.236720500696293
15573_110_NCAN_CSPG3	9	MR Egger	0.00405286461826745	0.348905299568245	1.00406108858052	0.50671755440103	1.9895475513833	0.991056151163142
15573_110_NCAN_CSPG3	9	Weighted median	-0.333638	0.256472353361332	0.716313050518275	0.433300498931106	1.18417677249058	0.193301894068072
15573_110_NCAN_CSPG3	9	Inverse variance weighted	-0.422168	0.214185092206343	0.655623629199126	0.430860386155419	0.997637185910105	0.0487187632463576
15573_110_NCAN_CSPG3	9	Simple mode	-1.0672	0.521610756308446	0.343970395966798	0.123741970323589	0.956147966548102	0.0749758794597313
15573_110_NCAN_CSPG3	9	Weighted mode	-0.253145	0.289374498159455	0.77635553096608	0.440291301769157	1.36892986084388	0.407178160585034
15644_1_BTD_Biotinidase	69	MR Egger	0.189547337658334	0.104185513370763	1.20870233977358	0.98545061176289	1.48253126918313	0.0733301222914417
15644_1_BTD_Biotinidase	69	Weighted median	0.133692382623626	0.106777293641986	1.1430411462385	0.927195247223858	1.40913477059571	0.210545256992772
15644_1_BTD_Biotinidase	69	Inverse variance weighted	0.159709082953848	0.0644486878117169	1.17316952632949	1.03395334568693	1.33113040665657	0.0132091072521155
15644_1_BTD_Biotinidase	69	Simple mode	0.151034566993092	0.202561557220268	1.16303686007409	0.781933105324897	1.72988549618828	0.458464853864442
15644_1_BTD_Biotinidase	69	Weighted mode	0.151034566993092	0.0948268729275553	1.16303686007409	0.965773345830943	1.40059232710258	0.115856719113409
15686_49_INHBC_INHBC	107	MR Egger	0.10235150537497	0.0527828545736851	1.10777279139037	0.998897718369746	1.22851472656039	0.0551723612709327
15686_49_INHBC_INHBC	107	Weighted median	0.0388692194710927	0.0388932234257216	1.03963451080786	0.963327830885812	1.12198556027269	0.317609276961378
15686_49_INHBC_INHBC	107	Inverse variance weighted	0.0502404667886942	0.0254868358070679	1.05152392255755	1.00028630958561	1.10538607708115	0.0486973431713508
15686_49_INHBC_INHBC	107	Simple mode	0.0622313533308354	0.0668135306993088	1.06420852443652	0.933585091619329	1.21310825724405	0.353753715393757
15686_49_INHBC_INHBC	107	Weighted mode	0.0415082814182504	0.0394027790630458	1.04238179421534	0.964909305936547	1.12607454216329	0.294536875717321
16060_99_NID2_NID2	95	MR Egger	0.131005745476673	0.0965653201984052	1.1399743309891	0.943402477390308	1.37750483643939	0.178175222372937
16060_99_NID2_NID2	95	Weighted median	0.21252806819946	0.0775728382458311	1.23680082785043	1.06235198644563	1.4398959170674	0.00614910348497037
16060_99_NID2_NID2	95	Inverse variance weighted	0.165107126896861	0.0549123229720075	1.17951947020408	1.0591630003235	1.31355247508229	0.00264064738769811
16060_99_NID2_NID2	95	Simple mode	0.39118615707301	0.165458055628687	1.47873376454175	1.06917611728776	2.04517619785861	0.0201231591211587
16060_99_NID2_NID2	95	Weighted mode	0.168278914949579	0.0675721271485501	1.18326659536962	1.03648745100952	1.35083143973805	0.0145167904511376
16558_2_MYOC_MYOC	50	MR Egger	-0.140654	0.143242504858786	0.868790248455041	0.65612178228365	1.15039085150242	0.331059845061824
16558_2_MYOC_MYOC	50	Weighted median	-0.210024	0.112682623778638	0.81056452000336	0.649935417712097	1.01089250282913	0.0623417404217859
16558_2_MYOC_MYOC	50	Inverse variance weighted	-0.189681	0.0773473999609377	0.827222952066477	0.710858465605381	0.962635806612805	0.0141936062598734
16558_2_MYOC_MYOC	50	Simple mode	-0.134422	0.188002297068813	0.874221214153677	0.604770439276924	1.26372369024865	0.478001407661684
16558_2_MYOC_MYOC	50	Weighted mode	-0.205579	0.108889889677565	0.814175672323193	0.657702020659842	1.00787591429001	0.0649608839272071
16773_29_SCUBE3_SCUB3	17	MR Egger	0.328007021319257	0.288382173745759	1.38819871924159	0.788816120453269	2.4430226945624	0.273212659252053
16773_29_SCUBE3_SCUB3	17	Weighted median	0.417846821063855	0.233503698573367	1.51868802556815	0.960961985390795	2.40010880145913	0.0735398730979021
16773_29_SCUBE3_SCUB3	17	Inverse variance weighted	0.395236382222927	0.167221607226778	1.48473511443005	1.06981103712302	2.06058666766972	0.0181008562678092
16773_29_SCUBE3_SCUB3	17	Simple mode	0.265830144254189	0.364456850025174	1.30451346076082	0.638581938671782	2.66489743328122	0.476307773443306
16773_29_SCUBE3_SCUB3	17	Weighted mode	0.407685815312132	0.236010378112164	1.50333476220071	0.946584982993828	2.38754622970372	0.103344485197984
16890_37_ADAMTSL1_ATL1	54	MR Egger	0.126305271872217	0.150971775269969	1.13462848558193	0.844002849964306	1.52532873597334	0.406637254475277
16890_37_ADAMTSL1_ATL1	54	Weighted median	0.150728110607475	0.12333767485942	1.16268049460964	0.913005173319332	1.48063337651309	0.221678586768634
16890_37_ADAMTSL1_ATL1	54	Inverse variance weighted	0.168876810074367	0.081735700922465	1.18397427623671	1.00871257169576	1.38968733623857	0.0388159448417868
16890_37_ADAMTSL1_ATL1	54	Simple mode	0.221694914896199	0.202857504476937	1.24819051543655	0.83869699000602	1.85761911797795	0.279397799176624
16890_37_ADAMTSL1_ATL1	54	Weighted mode	0.2076835741189	0.138179432997224	1.23082364346819	0.938804412792464	1.6136767367914	0.138774842589725
16900_29_MDGA1_MDGA1	168	MR Egger	-0.123586	0.0456691311527568	0.883745424975892	0.808077155390783	0.966499264278953	0.00751862321861591
16900_29_MDGA1_MDGA1	168	Weighted median	-0.0875105	0.0486105566657089	0.916209220610483	0.832945367105636	1.00779639227552	0.071823188413066
16900_29_MDGA1_MDGA1	168	Inverse variance weighted	-0.063831	0.02781280382805	0.938163565914751	0.888390337448887	0.990725404485302	0.0217319228721013
16900_29_MDGA1_MDGA1	168	Simple mode	0.0672427744060577	0.0890536483560773	1.06955510726359	0.898254021129911	1.27352408178998	0.451263576201732
16900_29_MDGA1_MDGA1	168	Weighted mode	-0.0483028	0.0508597814378538	0.952845256279406	0.862441519810971	1.05272538665945	0.343624810002449
16913_8_RNASET2_RNT2	52	MR Egger	-0.359297	0.136259725450438	0.698166985448869	0.534530743170025	0.911897296458618	0.0111196220149343
16913_8_RNASET2_RNT2	52	Weighted median	-0.332257	0.110240376811296	0.71730318128689	0.577915381784275	0.890310017871015	0.00257888056780029
16913_8_RNASET2_RNT2	52	Inverse variance weighted	-0.297903	0.0824269147189981	0.742373116310116	0.631624591015526	0.872540195013474	0.000301333501588149
16913_8_RNASET2_RNT2	52	Simple mode	-0.310252	0.173594691563231	0.733262030684876	0.521785988240679	1.03044776548522	0.0798449744986287
16913_8_RNASET2_RNT2	52	Weighted mode	-0.346955	0.103754036548576	0.706837303258665	0.576769441437376	0.866236900541875	0.00155389939563379
16919_1_DBI_ACBP	22	MR Egger	0.133423571906443	0.28610498032953	1.14273392582213	0.652240324220787	2.00208539204458	0.64600812947501
16919_1_DBI_ACBP	22	Weighted median	-0.104359	0.233827641386036	0.900902219088042	0.569691251321898	1.42467486814039	0.655376615596375
16919_1_DBI_ACBP	22	Inverse variance weighted	-0.351185	0.16006448414141	0.703853386804848	0.514318996222895	0.963234089650375	0.0282337371558695
16919_1_DBI_ACBP	22	Simple mode	-0.213682	0.505019247205982	0.807605237393717	0.300135982520766	2.17310238508519	0.676511954607349
16919_1_DBI_ACBP	22	Weighted mode	0.126531288341023	0.299567334932044	1.1348849592882	0.630891936821199	2.04149680103394	0.677040773322199
17140_57_PDGFD_PDGFD	52	MR Egger	-0.199583	0.165256417514936	0.819072618576623	0.592452184782516	1.13237822685765	0.232838969858212
17140_57_PDGFD_PDGFD	52	Weighted median	-0.252993	0.125673844942566	0.776472973766593	0.606946774286272	0.993349506962811	0.0441045915323195
17140_57_PDGFD_PDGFD	52	Inverse variance weighted	-0.219557	0.0784311292686	0.80287449778495	0.688471137667204	0.936288282726863	0.00512042115681957
17140_57_PDGFD_PDGFD	52	Simple mode	-0.227327	0.246365137711777	0.796659952763559	0.491544393904454	1.29116940037893	0.360495284664864
17140_57_PDGFD_PDGFD	52	Weighted mode	-0.213667	0.130674606429828	0.807617027819754	0.625133822043221	1.0433690205604	0.108184141249423
17329_2_BDH2_BDH2	14	MR Egger	0.150228272839567	0.36014959609815	1.16209948820299	0.57369066704486	2.35401288195622	0.683950614000694
17329_2_BDH2_BDH2	14	Weighted median	0.537943893747538	0.202693235545708	1.71248219453358	1.15103916037743	2.54778062080263	0.00795484247670837
17329_2_BDH2_BDH2	14	Inverse variance weighted	0.561390623019604	0.165667523835463	1.75310871931332	1.26703848566274	2.42564864170233	0.0007023548510023
17329_2_BDH2_BDH2	14	Simple mode	0.808725275291704	0.331773714486651	2.24504434838689	1.17169192608437	4.30166327344052	0.0299024098100122
17329_2_BDH2_BDH2	14	Weighted mode	0.547692262159282	0.212548188759275	1.72925773609511	1.14007928951181	2.62291609483169	0.0229960313551796
17331_138_KREMEN1_KREM1	19	MR Egger	-0.477613	0.273651658828054	0.620262012675315	0.362775700583602	1.06050367692522	0.0989740240667167
17331_138_KREMEN1_KREM1	19	Weighted median	-0.387333	0.193326558893307	0.67886473814604	0.464751030927525	0.991621969677696	0.0451216409373833
17331_138_KREMEN1_KREM1	19	Inverse variance weighted	-0.393692	0.138396529614523	0.674561832057524	0.514299687086368	0.884763644027626	0.00444579790367018
17331_138_KREMEN1_KREM1	19	Simple mode	0.0199341035626821	0.311541084165172	1.02013411460808	0.553946913185598	1.87865224449503	0.949687027939276
17331_138_KREMEN1_KREM1	19	Weighted mode	-0.385331	0.200975478458682	0.680225724442672	0.458753373499211	1.0086182749223	0.0712107044147162
17384_110_PFKM_K6PF	13	MR Egger	0.0312067911190711	0.451184449616305	1.03169882798418	0.426085720924079	2.49809467765194	0.946098529711165
17384_110_PFKM_K6PF	13	Weighted median	0.617129059187154	0.27049011493536	1.85359882305914	1.09086224492319	3.14964479964025	0.0225175958055203
17384_110_PFKM_K6PF	13	Inverse variance weighted	0.759704379468882	0.232404166672864	2.13764419556921	1.35552958117356	3.37102396754385	0.00107969080296482
17384_110_PFKM_K6PF	13	Simple mode	1.16860242126438	0.477941190882223	3.21749279530559	1.2609150494838	8.21011684497016	0.0308699900029297
17384_110_PFKM_K6PF	13	Weighted mode	0.615254783311418	0.295289406645517	1.85012792123165	1.03716138742624	3.30032853750484	0.0592474032327065
17680_12_EPHB1_EPHB1	41	MR Egger	-0.31471	0.198101833558881	0.730000726633389	0.495103056453517	1.07634371054485	0.120220042305179
17680_12_EPHB1_EPHB1	41	Weighted median	0.120873056707771	0.149021171957044	1.12848165009856	0.842645913774289	1.51127634252111	0.417300600413214
17680_12_EPHB1_EPHB1	41	Inverse variance weighted	0.305304581842788	0.0993113856856229	1.35703826928312	1.11700865210541	1.64864691139845	0.00211057054312134
17680_12_EPHB1_EPHB1	41	Simple mode	0.144322952977942	0.331495461941052	1.15525714201984	0.603259303423688	2.2123472553402	0.665634677903697
17680_12_EPHB1_EPHB1	41	Weighted mode	0.0470473933246056	0.156605534104105	1.04817168424338	0.771129116224488	1.42474698015394	0.765412908159215
17682_1_CD46_CD46	15	MR Egger	0.0187909669951771	0.380694451355598	1.01896862827985	0.483178002675634	2.14889142235135	0.961382946518809
17682_1_CD46_CD46	15	Weighted median	0.301684254008854	0.17531617881313	1.35213422833943	0.958931671415147	1.90656646969329	0.0852869427834545
17682_1_CD46_CD46	15	Inverse variance weighted	0.281490622503545	0.130195539602379	1.32510357010923	1.02665645812468	1.71030869929324	0.0306135196463296
17682_1_CD46_CD46	15	Simple mode	0.300206450758377	0.269282307678336	1.35013751571929	0.796453228775284	2.28873616867084	0.283691862458937
17682_1_CD46_CD46	15	Weighted mode	0.290311275758784	0.171963597253263	1.33684355025755	0.954337997834537	1.87266008680404	0.113510831586985
17692_2_BTN3A3_BT3A3	51	MR Egger	-0.0582228	0.0905893167980115	0.943439759908766	0.78995616325646	1.1267442700966	0.523407701848105
17692_2_BTN3A3_BT3A3	51	Weighted median	-0.0107131	0.0766363808786002	0.989344044972487	0.851359800201971	1.14969210325683	0.888824506097808
17692_2_BTN3A3_BT3A3	51	Inverse variance weighted	-0.102238	0.0497682082947013	0.902814695656792	0.818907909091037	0.995318723442998	0.0399483634274428
17692_2_BTN3A3_BT3A3	51	Simple mode	0.0318074486305306	0.124070387663097	1.03231871178507	0.809474092104259	1.31651146478487	0.79872002073943
17692_2_BTN3A3_BT3A3	51	Weighted mode	-0.0065767	0.089956116676311	0.993444880679269	0.832859192968893	1.18499350103795	0.942010215666232
18206_18_ADH6_ADH6	14	MR Egger	0.362097434367502	0.380893432137837	1.43633888391334	0.680822472966398	3.03026041495436	0.360535576121736
18206_18_ADH6_ADH6	14	Weighted median	0.384884817202118	0.243910489319326	1.46944505690016	0.911029735396296	2.37014083224083	0.114571199904758
18206_18_ADH6_ADH6	14	Inverse variance weighted	0.531236373483033	0.188727853145602	1.70103412252014	1.17507242185459	2.46241596021043	0.00488034043660746
18206_18_ADH6_ADH6	14	Simple mode	0.393645787652982	0.312722608136239	1.48237538000712	0.803088367577214	2.73623284306875	0.230249229190958
18206_18_ADH6_ADH6	14	Weighted mode	0.368055794305211	0.278075548822666	1.44492265518053	0.837803006938286	2.49199568653223	0.208447108015697
18215_5_THG1L_THG1	45	MR Egger	0.0556133328002569	0.161025992472694	1.05718882445312	0.771053426732889	1.44950812978585	0.731501098533843
18215_5_THG1L_THG1	45	Weighted median	0.139876558154829	0.125886874039616	1.15013181570056	0.898649934237942	1.47198941777968	0.26651282099556
18215_5_THG1L_THG1	45	Inverse variance weighted	0.177839978161553	0.08808602402303	1.1946341383874	1.00520486959173	1.41976105346589	0.0434939507665108
18215_5_THG1L_THG1	45	Simple mode	0.0975773455744231	0.246369387680598	1.10249671150711	0.68024200509542	1.78686260151413	0.693974051243544
18215_5_THG1L_THG1	45	Weighted mode	0.112240002481867	0.112284460175994	1.11878133872401	0.897773437338078	1.39419549723852	0.322967970195778
18222_34_SH3GLB2_SHLB2	35	MR Egger	-0.356582	0.179299667374395	0.700065407810338	0.492624106792006	0.994859099373266	0.0550737540743279
18222_34_SH3GLB2_SHLB2	35	Weighted median	-0.340149	0.137463440952877	0.711664403378032	0.543580664589658	0.931722292620057	0.0133434946618432
18222_34_SH3GLB2_SHLB2	35	Inverse variance weighted	-0.330446	0.0928312006511322	0.718603493227564	0.599059294610021	0.862003119098621	0.000371365224412841
18222_34_SH3GLB2_SHLB2	35	Simple mode	-0.377152	0.207985826658802	0.685811486252599	0.456208785802481	1.03096961153141	0.0786125849701873
18222_34_SH3GLB2_SHLB2	35	Weighted mode	-0.342885	0.121616020226208	0.70971964944523	0.55919745092526	0.900758721226689	0.00796723876952808
18397_5_AKR1C4_AK1C4	90	MR Egger	-0.128733	0.0913907567320527	0.879208753655443	0.735019093357089	1.05168428887168	0.162477278547796
18397_5_AKR1C4_AK1C4	90	Weighted median	-0.0771622	0.0994283482142009	0.92573973091423	0.761822481405943	1.12492617415486	0.437714818565699
18397_5_AKR1C4_AK1C4	90	Inverse variance weighted	-0.135398	0.0589083705041163	0.87336800664503	0.778132332869073	0.980259581578723	0.0215358766379077
18397_5_AKR1C4_AK1C4	90	Simple mode	-0.161971	0.172846431078484	0.850466288625207	0.606076229257058	1.19340253448739	0.351254621061834
18397_5_AKR1C4_AK1C4	90	Weighted mode	-0.12457	0.0884172191971875	0.882876727455707	0.742399742575932	1.0499347873941	0.162353413296088
18831_6_LRIG1_LRIG1	113	MR Egger	-0.162521	0.0878532764983766	0.849998446378077	0.715543289602486	1.0097185863437	0.0669862308253511
18831_6_LRIG1_LRIG1	113	Weighted median	-0.104571	0.0831708047758058	0.900710437122315	0.765224342612587	1.06018489789706	0.20864154394606
18831_6_LRIG1_LRIG1	113	Inverse variance weighted	-0.108216	0.0508489394285671	0.897433468647489	0.812304334961896	0.991484097750682	0.0333211924516441
18831_6_LRIG1_LRIG1	113	Simple mode	-0.286628	0.164201585576552	0.750791320510799	0.544186836094592	1.03583469787639	0.0836257581970415
18831_6_LRIG1_LRIG1	113	Weighted mode	-0.142052	0.0703717234230867	0.867575890089943	0.755798201607629	0.99588477911742	0.0459181466920182
18930_28_SLIT2_SLIT2	7	MR Egger	1.60752237091436	1.27306392784829	4.99043145979516	0.411608375056098	60.5051006348427	0.262376179508337
18930_28_SLIT2_SLIT2	7	Weighted median	0.38095653723949	0.320565382954057	1.46368398828061	0.780866082316255	2.74358288324444	0.234679988703156
18930_28_SLIT2_SLIT2	7	Inverse variance weighted	0.514785932664733	0.248972837960014	1.67328026880761	1.02716149747478	2.72582925359272	0.0386739883343577
18930_28_SLIT2_SLIT2	7	Simple mode	0.482355508478543	0.432480109258243	1.61988556600139	0.693984602259374	3.78110586084575	0.307379718087224
18930_28_SLIT2_SLIT2	7	Weighted mode	0.371306239349726	0.416747680369453	1.44962693822964	0.640491637347735	3.28094566346407	0.407255257306777
19277_4_TSTD1_KAT	16	MR Egger	0.38550799890246	0.177288312041689	1.47036107356205	1.03875502767978	2.08130081591576	0.0473074628890378
19277_4_TSTD1_KAT	16	Weighted median	0.335364590399071	0.127388249115096	1.39845015378811	1.08946159224037	1.79507276489514	0.0084729598874384
19277_4_TSTD1_KAT	16	Inverse variance weighted	0.289379000465205	0.110173853506956	1.33559782481402	1.07620207654969	1.65751543182938	0.00862510276719457
19277_4_TSTD1_KAT	16	Simple mode	0.273494470532711	0.254231042041433	1.31455009043024	0.798677238325032	2.16362988367386	0.299028938127859
19277_4_TSTD1_KAT	16	Weighted mode	0.328431105340033	0.123572512592057	1.3887875569856	1.09005590144964	1.76938712580983	0.0179099276456698
19293_6_VPS26A_VP26A	7	MR Egger	-0.351682	0.468554048133487	0.703504003781074	0.280818241718811	1.76241358220444	0.486711084128234
19293_6_VPS26A_VP26A	7	Weighted median	-0.494809	0.253855973631718	0.609687047149683	0.370698135229561	1.00275199720632	0.0512746359422403
19293_6_VPS26A_VP26A	7	Inverse variance weighted	-0.521173	0.228246306584714	0.593823436343833	0.379638418345532	0.92884770484491	0.0224079433917674
19293_6_VPS26A_VP26A	7	Simple mode	-0.445782	0.407083375589381	0.640323195590825	0.288325377628462	1.42205239852315	0.315487855262818
19293_6_VPS26A_VP26A	7	Weighted mode	-0.480753	0.278034986475297	0.618317392140391	0.358544697556524	1.06630051993175	0.134520070667635
19372_7_MDGA2_MDGA2	85	MR Egger	-0.156135	0.0890465267601576	0.855444077585361	0.718445270433775	1.01856689714728	0.0832245160583687
19372_7_MDGA2_MDGA2	85	Weighted median	-0.158767	0.0657307985570158	0.853195470334689	0.750062331977482	0.970509355776427	0.0157176551183466
19372_7_MDGA2_MDGA2	85	Inverse variance weighted	-0.154329	0.044780644324882	0.856989813233823	0.784978217593385	0.935607541108835	0.000568238641099594
19372_7_MDGA2_MDGA2	85	Simple mode	-0.136686	0.108038620608839	0.872243830403797	0.705786871684684	1.07795898478739	0.209311951580874
19372_7_MDGA2_MDGA2	85	Weighted mode	-0.150272	0.0748400496659767	0.860473787923379	0.743074758235865	0.996420792789449	0.0478666645249069
19448_104_UPP1_UPP1	4	MR Egger	1.56007650480343	0.993581531686385	4.75918533174878	0.67885800479791	33.3646283344267	0.256958748676865
19448_104_UPP1_UPP1	4	Weighted median	0.774868421713116	0.395096977604712	2.17030654317856	1.00047846003338	4.70797791209469	0.0498544486930829
19448_104_UPP1_UPP1	4	Inverse variance weighted	0.838888021170196	0.332322846665113	2.3137926573005	1.20627275978256	4.43816410306964	0.0115923531566604
19448_104_UPP1_UPP1	4	Simple mode	0.569778134845379	0.556490241631495	1.76787477810846	0.59396033451951	5.26193593988113	0.381246133524783
19448_104_UPP1_UPP1	4	Weighted mode	1.15017975213935	0.439632023211564	3.15876065264676	1.33442566612625	7.47720095168298	0.0792580845455821
19482_11_HDHD3_HDHD3	4	MR Egger	0.716206199028642	1.17084522982241	2.04665386590719	0.206253259259217	20.3089738405948	0.603007747216223
19482_11_HDHD3_HDHD3	4	Weighted median	0.528941302687319	0.263394638018908	1.69713460532872	1.01276864395684	2.84395245231054	0.0446251924873982
19482_11_HDHD3_HDHD3	4	Inverse variance weighted	0.51166099959844	0.25076666175715	1.6680595414267	1.02036289410307	2.72689515644382	0.0413118103941481
19482_11_HDHD3_HDHD3	4	Simple mode	0.553819447832212	0.425371551115777	1.73988574596536	0.755852677854847	4.00501645056653	0.283876716474203
19482_11_HDHD3_HDHD3	4	Weighted mode	0.528063779300154	0.269060225204094	1.69564598326724	1.00070598699172	2.87318686801674	0.144482024183113
2190_55_F11_Coagulation_Factor_XI	39	MR Egger	0.177613256073871	0.143004926917956	1.19436331914304	0.902418948390779	1.58075552453565	0.222048874188956
2190_55_F11_Coagulation_Factor_XI	39	Weighted median	0.230941222148784	0.112922354303384	1.25978518980656	1.00965976494934	1.57187478351738	0.0408417573258537
2190_55_F11_Coagulation_Factor_XI	39	Inverse variance weighted	0.180527898455816	0.0778181287113962	1.19784953916678	1.02840017459342	1.39521905375923	0.0203479413597392
2190_55_F11_Coagulation_Factor_XI	39	Simple mode	0.238336366403274	0.198010157584111	1.26913601575332	0.860911521378379	1.87093120080838	0.236166922690301
2190_55_F11_Coagulation_Factor_XI	39	Weighted mode	0.209634335413428	0.113133921875133	1.23322703004684	0.987964857240189	1.53937551168221	0.0716636043376414
2474_54_APCS_SAP	17	MR Egger	-0.266279	0.211138454870408	0.766225417281028	0.506561143127534	1.15899412746641	0.226514431378471
2474_54_APCS_SAP	17	Weighted median	-0.332084	0.173195109855723	0.717427190632822	0.510917970896981	1.00741	0.0551874938848031
2474_54_APCS_SAP	17	Inverse variance weighted	-0.326996	0.133371719888123	0.721086730305453	0.555212459695561	0.936517298094719	0.0142158231211537
2474_54_APCS_SAP	17	Simple mode	-0.333151	0.262257918592616	0.716661815631088	0.428623342218533	1.19826455396773	0.22213354721053
2474_54_APCS_SAP	17	Weighted mode	-0.293793	0.164369971224685	0.745430523824321	0.540122946418504	1.02877811345281	0.0928300533364494
2580_83_MPO_Myeloperoxidase	47	MR Egger	-0.0670572	0.108639851971447	0.935141750821563	0.755790342581651	1.15705380825919	0.540185510489312
2580_83_MPO_Myeloperoxidase	47	Weighted median	-0.115837	0.10802154642071	0.890620617403602	0.720680793399086	1.1006330283942	0.283563559035131
2580_83_MPO_Myeloperoxidase	47	Inverse variance weighted	-0.166475	0.0708084250560105	0.846643657511948	0.736931822921793	0.97268900664815	0.0187196395766387
2580_83_MPO_Myeloperoxidase	47	Simple mode	-0.208989	0.19010783761545	0.811404056883666	0.559002971503814	1.17776930908994	0.277349322099838
2580_83_MPO_Myeloperoxidase	47	Weighted mode	-0.137177	0.103496223510705	0.87181582384415	0.711749192999606	1.06788014398981	0.191573767346762
2658_27_NTRK3_TrkC	24	MR Egger	-0.607362	0.303524663823011	0.544786064381983	0.30051114278011	0.987623464471595	0.0578767645077849
2658_27_NTRK3_TrkC	24	Weighted median	-0.404161	0.190736775631241	0.667536412973187	0.459321251608289	0.970137700106074	0.0340948486225479
2658_27_NTRK3_TrkC	24	Inverse variance weighted	-0.511623	0.142455238440276	0.599521899740817	0.453465973771126	0.792620679518171	0.000328826359362635
2658_27_NTRK3_TrkC	24	Simple mode	-0.737146	0.328000546235719	0.478477459680542	0.251571698637228	0.910041473911905	0.0345053349982616
2658_27_NTRK3_TrkC	24	Weighted mode	-0.404965	0.224205428474714	0.666999918190484	0.429811733375149	1.03507851535966	0.0839874119684021
2700_56_PROS1_Protein_S	3	MR Egger	0.0197433624260549	1.48653200803025	1.01993955162372	0.0553621366249723	18.7903999445202	0.991545236931339
2700_56_PROS1_Protein_S	3	Weighted median	-1.40615	0.667163397817101	0.245083872378813	0.0662847747128316	0.906182524726396	0.0350602560229887
2700_56_PROS1_Protein_S	3	Inverse variance weighted	-1.42383	0.535585681428933	0.240790576812376	0.0842829545119037	0.687922038535653	0.00785010220876303
2700_56_PROS1_Protein_S	3	Simple mode	-1.39484	0.805725324786731	0.247873756074588	0.0510955767035021	1.20247980186342	0.225563588774858
2700_56_PROS1_Protein_S	3	Weighted mode	-1.41465	0.798985335795735	0.24301085082093	0.0507592992590703	1.16341782646182	0.218650910874118
2789_26_MMP7_MMP_7	36	MR Egger	-0.0265293	0.172313041190618	0.973819534072269	0.694708575950523	1.36506805554142	0.878551689300481
2789_26_MMP7_MMP_7	36	Weighted median	-0.10424	0.1386025782574	0.901009458792141	0.686670600699555	1.18225251526111	0.45200600374347
2789_26_MMP7_MMP_7	36	Inverse variance weighted	-0.179543	0.0880987814098506	0.835652331247642	0.703128064166814	0.993154525196063	0.0415529893055603
2789_26_MMP7_MMP_7	36	Simple mode	-0.195025	0.216981751469932	0.822814220847215	0.537778200392634	1.25892652683599	0.374897329574463
2789_26_MMP7_MMP_7	36	Weighted mode	-0.14683	0.140086290028227	0.863440535350451	0.65612800670597	1.13625626473276	0.301757761029496
2844_53_TIE1_sTie_1	25	MR Egger	-0.31451	0.306794560745006	0.730146634638159	0.400185441840578	1.33216767112134	0.315955025188557
2844_53_TIE1_sTie_1	25	Weighted median	-0.396651	0.191704867451986	0.672568497905119	0.4619064686165	0.979307316758777	0.0385392605119061
2844_53_TIE1_sTie_1	25	Inverse variance weighted	-0.339979	0.13194455697025	0.711785540347017	0.549586032693815	0.921855042355767	0.00997548662986487
2844_53_TIE1_sTie_1	25	Simple mode	-0.0253772	0.336017947461716	0.974942120919101	0.504608524201065	1.88366247012406	0.940424406493338
2844_53_TIE1_sTie_1	25	Weighted mode	-0.299275	0.207983037234543	0.741355519635203	0.493159938769238	1.11446198948199	0.163082836289555
3009_3_TGFBR3_TGF_b_R_III	8	MR Egger	1.79652460741248	0.874715500280693	6.0286590570611	1.0855450671246	33.4806274994691	0.0857849382656543
3009_3_TGFBR3_TGF_b_R_III	8	Weighted median	1.46545471988717	0.328134510477099	4.32951	2.27575321096899	8.2366883216321	7.96888064043178e-06
3009_3_TGFBR3_TGF_b_R_III	8	Inverse variance weighted	1.44078444594279	0.263218934542851	4.22400802365963	2.52155388932788	7.07589231364663	4.40706927911499e-08
3009_3_TGFBR3_TGF_b_R_III	8	Simple mode	1.36628812143412	0.500374481580791	3.92077022877649	1.47042891557751	10.4543912487076	0.0293161909966645
3009_3_TGFBR3_TGF_b_R_III	8	Weighted mode	1.48545641634903	0.433273601135471	4.41698093509705	1.8893637990094	10.3260793878023	0.0110083644153583
3033_57_LGALS2_Galectin_2	19	MR Egger	0.0363638068402425	0.384800511872797	1.03703305759068	0.4878022423095	2.20465891555607	0.925816577839186
3033_57_LGALS2_Galectin_2	19	Weighted median	-0.335264	0.207781906103956	0.715148957744427	0.475914548206807	1.0746425670112	0.10662723118543
3033_57_LGALS2_Galectin_2	19	Inverse variance weighted	-0.315667	0.15815365609796	0.729302106961815	0.534914485029318	0.994330080984423	0.0459390694533481
3033_57_LGALS2_Galectin_2	19	Simple mode	0.231953970802511	0.382472826416002	1.26106168183521	0.595893827852525	2.66872468057619	0.551782927356949
3033_57_LGALS2_Galectin_2	19	Weighted mode	-0.25823	0.215047817716956	0.772417918483032	0.506757216515094	1.17734769500986	0.245392719889658
3038_9_CXCL11_I_TAC	45	MR Egger	-0.205194	0.165029627105001	0.81448894466432	0.58939865343734	1.1255408153913	0.220464709409618
3038_9_CXCL11_I_TAC	45	Weighted median	-0.19519	0.138415860320389	0.822678625248883	0.62720318452293	1.07907634581955	0.158490019434508
3038_9_CXCL11_I_TAC	45	Inverse variance weighted	-0.191158	0.0848336539556351	0.826002304440696	0.699470486995646	0.975423294658016	0.0242387222940653
3038_9_CXCL11_I_TAC	45	Simple mode	-0.299527	0.24284025683193	0.741168932712083	0.460476432026763	1.19296308911992	0.223963688160397
3038_9_CXCL11_I_TAC	45	Weighted mode	-0.261442	0.123859988289362	0.769940176151294	0.603983718516082	0.981496448792272	0.0405086434071497
3054_3_HP_Haptoglobin__Mixed_Type	76	MR Egger	-0.163548	0.074419896627101	0.849125853947617	0.733879184139333	0.982470591106695	0.0311041743889311
3054_3_HP_Haptoglobin__Mixed_Type	76	Weighted median	-0.137285	0.0588881977398154	0.871721992990371	0.776696516277554	0.978373427893107	0.0197387400187429
3054_3_HP_Haptoglobin__Mixed_Type	76	Inverse variance weighted	-0.126709	0.0404663632573646	0.880989722632497	0.813814040405596	0.953710372208942	0.00174078289354793
3054_3_HP_Haptoglobin__Mixed_Type	76	Simple mode	-0.170015	0.0974503094087032	0.843652217192243	0.69696677308334	1.0212094622885	0.085145381878247
3054_3_HP_Haptoglobin__Mixed_Type	76	Weighted mode	-0.139933	0.0615508783183547	0.869416838099466	0.770610427957153	0.980892044732233	0.0258620306592712
3184_25_F7_Coagulation_Factor_VII	101	MR Egger	0.0527455074954298	0.0736826629250082	1.05416	0.912403902100736	1.21794319080949	0.475770943405404
3184_25_F7_Coagulation_Factor_VII	101	Weighted median	0.123081168258319	0.0591534816676784	1.13097621659169	1.0071658972302	1.27000646667418	0.037460570588836
3184_25_F7_Coagulation_Factor_VII	101	Inverse variance weighted	0.0964972127404068	0.0404023080394082	1.10130651151238	1.01745935234683	1.19206337776737	0.0169215250413333
3184_25_F7_Coagulation_Factor_VII	101	Simple mode	0.117663915456317	0.117143335961691	1.12486599775627	0.894100563472966	1.41519149478365	0.317589005724169
3184_25_F7_Coagulation_Factor_VII	101	Weighted mode	0.130115647033405	0.0636400995655009	1.13896009306448	1.00539555574839	1.29026837862619	0.0435264233133255
3212_30_ASAH2_ASAH2	87	MR Egger	0.251730572681027	0.0801088831313407	1.28624943985742	1.0993478735137	1.50492638535394	0.00230730733495328
3212_30_ASAH2_ASAH2	87	Weighted median	0.198840611560039	0.0710578998784565	1.2199874984982	1.06137700648981	1.40230049020398	0.00513739619966663
3212_30_ASAH2_ASAH2	87	Inverse variance weighted	0.164307472878757	0.0492057393247262	1.17857663973962	1.07021998821277	1.29790408611186	0.000840220887937542
3212_30_ASAH2_ASAH2	87	Simple mode	0.267904600983855	0.128597265789424	1.30722242633289	1.01598030084535	1.68195236707426	0.0401942756003352
3212_30_ASAH2_ASAH2	87	Weighted mode	0.204105544194513	0.0600202610036509	1.22642758893751	1.09031411391272	1.37953330303076	0.0010217283680925
3235_50_WFIKKN2_WFKN2	75	MR Egger	0.109107013595497	0.0971209645977102	1.11528169425972	0.921963100831972	1.3491356177144	0.264942838663201
3235_50_WFIKKN2_WFKN2	75	Weighted median	0.0960950918266149	0.0990435808352542	1.10086374216098	0.906621408582691	1.33672221649742	0.331931667019676
3235_50_WFIKKN2_WFKN2	75	Inverse variance weighted	0.129359478353299	0.0596191648499282	1.13809917265576	1.01258444121044	1.27917206119756	0.0300247787720949
3235_50_WFIKKN2_WFKN2	75	Simple mode	-0.0515689	0.16678223845948	0.949738237184207	0.684913956511121	1.31695771504566	0.758039203041035
3235_50_WFIKKN2_WFKN2	75	Weighted mode	0.0709167524878858	0.0888179951525064	1.07349185662219	0.901976765598705	1.27762134257331	0.427164330376488
3302_58_CST7_CYTF	89	MR Egger	-0.19257	0.0893796067720242	0.82483675186817	0.692287589438804	0.982764500782047	0.0339636021867091
3302_58_CST7_CYTF	89	Weighted median	-0.158752	0.078469149941629	0.853207571238163	0.731577620761789	0.995059360700645	0.0430608927934897
3302_58_CST7_CYTF	89	Inverse variance weighted	-0.124472	0.0486110526131975	0.882963047155511	0.802719780592124	0.971227770252601	0.0104501069993743
3302_58_CST7_CYTF	89	Simple mode	-0.109198	0.135721020897371	0.896553262595312	0.687144429316536	1.16977991580285	0.423234023989265
3302_58_CST7_CYTF	89	Weighted mode	-0.199607	0.0767985726425885	0.819052901902508	0.704595213504961	0.952103623835072	0.010959319547289
3309_2_FCGR2A_FCG2A	165	MR Egger	-0.0221246	0.0456733469127165	0.97811833202802	0.894362251982356	1.06971808048552	0.628745239487799
3309_2_FCGR2A_FCG2A	165	Weighted median	0.0506244797256054	0.0403556636673623	1.05192779888919	0.971928904162653	1.1385113554465	0.209675631123029
3309_2_FCGR2A_FCG2A	165	Inverse variance weighted	0.0531780105940735	0.0261013027592658	1.05461736147415	1.0020214976629	1.1099739693378	0.0416129801865138
3309_2_FCGR2A_FCG2A	165	Simple mode	-0.035136	0.0728236614872338	0.965474073143294	0.837050892158369	1.11360037322025	0.6301076683931
3309_2_FCGR2A_FCG2A	165	Weighted mode	0.0432356971422605	0.0435227505994098	1.04418397702842	0.958803722442111	1.13716723492249	0.321976301641345
3320_49_IGFBP7_IGFBP_7	52	MR Egger	0.0977906116911797	0.131517183665266	1.10273186177341	0.852158217337537	1.42698566326045	0.460623986290433
3320_49_IGFBP7_IGFBP_7	52	Weighted median	0.0844206272505078	0.102136856827736	1.08808647638911	0.890682182982779	1.3292420155257	0.4084954522642
3320_49_IGFBP7_IGFBP_7	52	Inverse variance weighted	0.156498122385126	0.0706481381244808	1.16940856661806	1.0181912528596	1.3430840147556	0.0267479259573287
3320_49_IGFBP7_IGFBP_7	52	Simple mode	0.0470848593557811	0.189143100748237	1.04821095581205	0.723513829689856	1.51862502525406	0.80440873364474
3320_49_IGFBP7_IGFBP_7	52	Weighted mode	0.082223199226882	0.109553870403293	1.08569810976669	0.875900843535482	1.34574637557501	0.456385914823345
3331_8_RGMB_RGMB	12	MR Egger	0.392275677444579	0.617052869826671	1.48034575309006	0.44168958172905	4.9614562791207	0.539231360353682
3331_8_RGMB_RGMB	12	Weighted median	0.418091924997433	0.276679986158611	1.51906030759913	0.883202433736786	2.61270138076958	0.130762240075199
3331_8_RGMB_RGMB	12	Inverse variance weighted	0.455686203495341	0.202419774233051	1.5772553298941	1.06072	2.34533667024061	0.0243732457968247
3331_8_RGMB_RGMB	12	Simple mode	0.612642596951272	0.402526543450737	1.84530134900886	0.838358531416736	4.06167163695419	0.156225319213942
3331_8_RGMB_RGMB	12	Weighted mode	0.443594422219944	0.298015890702479	1.5582983462558	0.868909133559919	2.79464634696018	0.164719558311723
3339_33_THBS2_TSP2	95	MR Egger	-0.162696	0.104202227119283	0.849849343962544	0.69285637472015	1.04241504269234	0.1218377242722
3339_33_THBS2_TSP2	95	Weighted median	-0.252183	0.0908468992348789	0.777102439780152	0.650351027421325	0.928557312051481	0.00550469202384429
3339_33_THBS2_TSP2	95	Inverse variance weighted	-0.154235	0.0548946565991487	0.857070276523902	0.769642707747299	0.954429180587965	0.00495937491339207
3339_33_THBS2_TSP2	95	Simple mode	-0.274665	0.168040142081268	0.759826472124165	0.546607723012051	1.0562168140605	0.105494187633099
3339_33_THBS2_TSP2	95	Weighted mode	-0.198358	0.096922298521264	0.820075972569757	0.67819121780681	0.991644514302467	0.0434924338559866
3421_54_TNFSF8_CD30_Ligand	8	MR Egger	0.504083124840566	0.763057343239259	1.65546696786556	0.371016305239298	7.38665886914693	0.53338984584965
3421_54_TNFSF8_CD30_Ligand	8	Weighted median	1.19581686129988	0.334901330586376	3.30625742146639	1.7149951512434	6.37397611828594	0.000356090673134747
3421_54_TNFSF8_CD30_Ligand	8	Inverse variance weighted	0.96315190733534	0.257655175222945	2.61994128531123	1.58114262159845	4.34122276176393	0.000185384448146211
3421_54_TNFSF8_CD30_Ligand	8	Simple mode	1.29896981995686	0.56876498293818	3.6655185778104	1.20224477289574	11.1757827916449	0.056316330453365
3421_54_TNFSF8_CD30_Ligand	8	Weighted mode	1.25277899397839	0.342449329576726	3.50005608963999	1.78885957523976	6.84815778733446	0.00808861038569167
3607_71_DKK3_DKK3	46	MR Egger	-0.219155	0.1688398901128	0.803197286552769	0.576903025705347	1.11825705947195	0.201049039125004
3607_71_DKK3_DKK3	46	Weighted median	-0.0759728	0.134063457393703	0.926841374395553	0.712669698612397	1.20537597566449	0.570922664213151
3607_71_DKK3_DKK3	46	Inverse variance weighted	-0.195179	0.0860529808006492	0.822687450546035	0.695000467136667	0.973833361687287	0.0233215877247419
3607_71_DKK3_DKK3	46	Simple mode	-0.270612	0.249768538211214	0.762912334603206	0.467592314833074	1.24474935071911	0.284379185035367
3607_71_DKK3_DKK3	46	Weighted mode	-0.100843	0.131861931573877	0.904075152339007	0.698170333762785	1.17070554498024	0.448406311527114
3799_11_CA3_Carbonic_anhydrase_III	25	MR Egger	-0.488642	0.316012522265011	0.613458688719762	0.330209856520746	1.13967392351938	0.135688112486939
3799_11_CA3_Carbonic_anhydrase_III	25	Weighted median	-0.160187	0.213088539758781	0.851984333251629	0.561108673423916	1.29364834030613	0.452207538776191
3799_11_CA3_Carbonic_anhydrase_III	25	Inverse variance weighted	-0.304822	0.153154256284865	0.737254815943941	0.546072219783431	0.995371388509933	0.0465587730504249
3799_11_CA3_Carbonic_anhydrase_III	25	Simple mode	-0.225101	0.357768331068115	0.798435324180138	0.396005475760782	1.60982361588288	0.535173708351237
3799_11_CA3_Carbonic_anhydrase_III	25	Weighted mode	-0.134855	0.26776491485651	0.873842622272289	0.517019742417183	1.47692798911258	0.619111611827595
3858_5_ACP1_PPAC	104	MR Egger	0.0785613163459392	0.0467731091856243	1.08172968084015	0.986971635893758	1.18558533989775	0.0960907790543749
3858_5_ACP1_PPAC	104	Weighted median	0.0675687642451466	0.0494508107706463	1.06990382819755	0.971071842894198	1.17879455569437	0.171818673476236
3858_5_ACP1_PPAC	104	Inverse variance weighted	0.0936164503907735	0.0293153514936379	1.09813847455031	1.03682002582715	1.16308335029085	0.00140594624184478
3858_5_ACP1_PPAC	104	Simple mode	0.108880171063524	0.069555350689684	1.11502872962898	0.972924965627507	1.27788792745815	0.120562402722414
3858_5_ACP1_PPAC	104	Weighted mode	0.0818302010469623	0.0427113344401343	1.08527151621635	0.998117759185504	1.18003537465525	0.0581518158946122
3894_15_NAGK_NAGK	23	MR Egger	-0.0236473	0.258908502502494	0.976630063593117	0.587953151371457	1.62224877762633	0.928092239076507
3894_15_NAGK_NAGK	23	Weighted median	-0.158944	0.191585857574938	0.853044005257399	0.58599007591035	1.2418	0.40675164365652
3894_15_NAGK_NAGK	23	Inverse variance weighted	-0.301882	0.13657204862662	0.739424974301892	0.565772247171885	0.966377010103232	0.0270755859014616
3894_15_NAGK_NAGK	23	Simple mode	-0.0424294	0.329736026242656	0.95845808918898	0.502222487992405	1.8291532750833	0.898782342926457
3894_15_NAGK_NAGK	23	Weighted mode	-0.0424294	0.226005625403578	0.95845808918898	0.615450678698092	1.49263286324594	0.852804200012335
4158_54_PLAU_uPA	28	MR Egger	-0.285621	0.187531940389312	0.75154729912209	0.520386364151969	1.0853922810567	0.139816851472812
4158_54_PLAU_uPA	28	Weighted median	-0.341187	0.138242306140862	0.710926013607382	0.542188346980686	0.932177535054415	0.0135856859080142
4158_54_PLAU_uPA	28	Inverse variance weighted	-0.256288	0.10020018657882	0.773918712645847	0.635921087865305	0.941862418486538	0.0105347549956576
4158_54_PLAU_uPA	28	Simple mode	-0.267098	0.260058046890185	0.765598268287307	0.459869984126491	1.27457918245714	0.313501655228407
4158_54_PLAU_uPA	28	Weighted mode	-0.394623	0.158047087501819	0.673934012821001	0.494407418352617	0.918649350267404	0.0189287899132654
4234_8_IL1RL1_IL_1_R4	96	MR Egger	0.170783112646147	0.0729282608881329	1.1862334420871	1.02823498064395	1.36850992780324	0.0213026754304867
4234_8_IL1RL1_IL_1_R4	96	Weighted median	0.120932247641384	0.0618837038821672	1.12854844795789	0.999640252756899	1.27407994613627	0.0506792628016149
4234_8_IL1RL1_IL_1_R4	96	Inverse variance weighted	0.0814856551379776	0.0415315015151436	1.08489765476521	1.00008391568902	1.17690416059151	0.0497601038541982
4234_8_IL1RL1_IL_1_R4	96	Simple mode	0.103388300598545	0.11229284534383	1.10892192053215	0.889847057725432	1.38193166472901	0.359537904278638
4234_8_IL1RL1_IL_1_R4	96	Weighted mode	0.103388300598545	0.0617102467486562	1.10892192053215	0.982589561128012	1.25149693675253	0.0971477369913939
4332_6_CLEC1B_CLC1B	8	MR Egger	-0.483152	0.588157539919761	0.61683583568788	0.194768980662409	1.95352692659135	0.442789567494172
4332_6_CLEC1B_CLC1B	8	Weighted median	0.338230957533227	0.285368744002251	1.40246437571616	0.801643101539716	2.45359352731294	0.235921866015137
4332_6_CLEC1B_CLC1B	8	Inverse variance weighted	0.659994710851674	0.261010004487384	1.93478210102546	1.15999431246217	3.22706907976375	0.0114512441734747
4332_6_CLEC1B_CLC1B	8	Simple mode	0.550005661862409	0.505540447808218	1.73326283133528	0.643486895966514	4.66862660501596	0.31264887528307
4332_6_CLEC1B_CLC1B	8	Weighted mode	0.380232460674589	0.289232777137125	1.46262455260883	0.82972265675941	2.57829596970315	0.230068158486308
4407_10_MST1_MSP	41	MR Egger	0.127036291226066	0.0887216959417481	1.13545822420487	0.954222665458475	1.35111586172083	0.160152483377153
4407_10_MST1_MSP	41	Weighted median	0.116055420183877	0.0420363465593856	1.1230581104956	1.03423723181587	1.21950697649462	0.00576537818724081
4407_10_MST1_MSP	41	Inverse variance weighted	0.0940792647549947	0.0307781901051975	1.09864682643744	1.03433014278263	1.16696284804563	0.00223798534402432
4407_10_MST1_MSP	41	Simple mode	0.124280953850981	0.0607357935785288	1.13233395989956	1.00525254493616	1.27548067716979	0.0473433658152808
4407_10_MST1_MSP	41	Weighted mode	0.116316809408898	0.0458846526700035	1.12335170415419	1.02673399958242	1.22906132624355	0.0152597283042449
4440_15_FCRL3_FCRL3	107	MR Egger	-0.0910328	0.104203527733907	0.91298779872149	0.744329342998151	1.11986277103734	0.384326816111303
4440_15_FCRL3_FCRL3	107	Weighted median	-0.0872676	0.0870842128287601	0.916431826065776	0.772631810178608	1.0869954883583	0.316292470366558
4440_15_FCRL3_FCRL3	107	Inverse variance weighted	-0.211336	0.0549240558728664	0.809502293294086	0.726885127842318	0.901509657782594	0.000119193110015574
4440_15_FCRL3_FCRL3	107	Simple mode	-0.448484	0.179750402359779	0.638595625633274	0.448972052396769	0.908306810860388	0.0141371569553595
4440_15_FCRL3_FCRL3	107	Weighted mode	-0.0530014	0.079374942051589	0.948378729345793	0.811739145838603	1.10801877534975	0.505754576562764
4549_78_FUT5_FUT5	132	MR Egger	0.10799328132358	0.0541456594049372	1.11404026048529	1.00186953429408	1.23876977939708	0.048189663106081
4549_78_FUT5_FUT5	132	Weighted median	0.178957467474608	0.0553956652902469	1.19596987546701	1.0729179184864	1.33313454680895	0.00123560087110218
4549_78_FUT5_FUT5	132	Inverse variance weighted	0.125059158562785	0.0357155031889841	1.13321549048363	1.05660059863201	1.21538578487907	0.000462582605270229
4549_78_FUT5_FUT5	132	Simple mode	0.106297780324006	0.116150289278341	1.11215300448441	0.885717890882322	1.39647659612199	0.361781556779523
4549_78_FUT5_FUT5	132	Weighted mode	0.130573643154893	0.0482211851801115	1.13948185184227	1.03671817232319	1.25243188104655	0.00767700254389906
4568_17_SLITRK5_SLIK5	28	MR Egger	0.464163107999036	0.37110717167684	1.5906824023055	0.768582823798759	3.29212470882241	0.222163915998079
4568_17_SLITRK5_SLIK5	28	Weighted median	0.296456735861031	0.194864069077921	1.34508436482149	0.918074405841109	1.97070295934202	0.128171663081986
4568_17_SLITRK5_SLIK5	28	Inverse variance weighted	0.284800213868201	0.14188084564366	1.32949638664629	1.0067363441905	1.75573341749849	0.0447156348338041
4568_17_SLITRK5_SLIK5	28	Simple mode	0.374791310576622	0.341752138157015	1.45468780498003	0.744499662478728	2.84233387415145	0.282468440147638
4568_17_SLITRK5_SLIK5	28	Weighted mode	0.341046614976829	0.254375008171932	1.4064187995139	0.854252551602925	2.31549070109836	0.191182173099252
4908_6_ENG_Endoglin	16	MR Egger	-0.238348	0.410263553296642	0.787928123025745	0.352584498929843	1.76079983362628	0.570499626312085
4908_6_ENG_Endoglin	16	Weighted median	-0.409258	0.215312676954893	0.6641427214323	0.435495394686624	1.01283632344471	0.0573331592826002
4908_6_ENG_Endoglin	16	Inverse variance weighted	-0.357366	0.174868764709363	0.699516441411823	0.496531298377258	0.985483197946725	0.0409907198915356
4908_6_ENG_Endoglin	16	Simple mode	-0.422159	0.301614531064979	0.655629895464322	0.36301057464783	1.18412682672832	0.181954978982866
4908_6_ENG_Endoglin	16	Weighted mode	-0.422159	0.203010243677765	0.655629895464322	0.440405709176586	0.976033123254096	0.0551388088225032
4920_10_LYZ_Lysozyme	98	MR Egger	-0.196588	0.110374695689557	0.821529037019086	0.661713630249919	1.01994265768805	0.0780594678448842
4920_10_LYZ_Lysozyme	98	Weighted median	-0.249937	0.0942813363539959	0.778849523868548	0.647440205241683	0.936930663124054	0.00802599032170894
4920_10_LYZ_Lysozyme	98	Inverse variance weighted	-0.190759	0.0579198503024723	0.826331737885782	0.737652912729922	0.925671314047044	0.000989487098931561
4920_10_LYZ_Lysozyme	98	Simple mode	-0.398898	0.167875836900563	0.671058928128504	0.482905177326607	0.932522793634098	0.0194588655483023
4920_10_LYZ_Lysozyme	98	Weighted mode	-0.296476	0.0973790840579808	0.743433250710398	0.614258580268721	0.899772532310483	0.00299976085342788
4961_17_ANXA2_annexin_II	84	MR Egger	0.0910570058442653	0.108494823964438	1.09533144377247	0.885508830810746	1.35487183184636	0.403755104707257
4961_17_ANXA2_annexin_II	84	Weighted median	0.0836649405747041	0.0916498786271726	1.08726453454114	0.908492341024202	1.30121533742185	0.361307956576067
4961_17_ANXA2_annexin_II	84	Inverse variance weighted	0.187462455032045	0.0584234392783951	1.20618496239508	1.07567945603715	1.35252389114863	0.00133343161968007
4961_17_ANXA2_annexin_II	84	Simple mode	0.17539874723056	0.189898037854551	1.19172131745843	0.821353732247986	1.72909629886001	0.358347583797594
4961_17_ANXA2_annexin_II	84	Weighted mode	0.121100408208413	0.0926984358938911	1.12873824126225	0.94121044359932	1.35362928232675	0.195028192308406
4989_7_FGG_Fibrinogen_g_chain_dimer	5	MR Egger	-0.228986	0.57329027023675	0.795339404934715	0.258557994357197	2.44651019441317	0.716316331238117
4989_7_FGG_Fibrinogen_g_chain_dimer	5	Weighted median	-0.281846	0.33518430894532	0.754389990303208	0.391094108324662	1.45515937304082	0.400421792366374
4989_7_FGG_Fibrinogen_g_chain_dimer	5	Inverse variance weighted	-0.601866	0.29115959290707	0.547788371943057	0.309579903265883	0.969288048967146	0.0387214141796032
4989_7_FGG_Fibrinogen_g_chain_dimer	5	Simple mode	-0.670585	0.663096038724231	0.511409531127209	0.139421603903753	1.87589083187066	0.369079807183192
4989_7_FGG_Fibrinogen_g_chain_dimer	5	Weighted mode	-0.330214	0.373778893620722	0.718769793038705	0.345479911544867	1.49539813494426	0.426895153602856
5069_9_CD55_DAF	39	MR Egger	0.17088971311982	0.151883588332808	1.18635990187413	0.880907969409652	1.59772628429962	0.267777307582549
5069_9_CD55_DAF	39	Weighted median	0.0499955799738918	0.124876168756086	1.0512664497406	0.823030754041114	1.34279447386847	0.688890455196926
5069_9_CD55_DAF	39	Inverse variance weighted	-0.172824	0.0871749800902415	0.841285824053939	0.709151016672568	0.998041067578283	0.0474240556789384
5069_9_CD55_DAF	39	Simple mode	-0.417219	0.304546525434581	0.658876598343164	0.362717781766688	1.19684888270379	0.178737579988163
5069_9_CD55_DAF	39	Weighted mode	0.0178908620222216	0.144497159018573	1.01805	0.766957745569809	1.35135162285773	0.902114660359531
5105_2_RTN4R_Nogo_Receptor	55	MR Egger	-0.270782	0.15097157942362	0.762782731196119	0.567402506052657	1.02544047445045	0.0785835636810877
5105_2_RTN4R_Nogo_Receptor	55	Weighted median	-0.239746	0.108333854460991	0.786827409621777	0.636302811027422	0.972960297837557	0.0268953952411414
5105_2_RTN4R_Nogo_Receptor	55	Inverse variance weighted	-0.211502	0.073823578667947	0.809368019406134	0.700335500036835	0.935375389085593	0.00417062654379834
5105_2_RTN4R_Nogo_Receptor	55	Simple mode	-0.0812282	0.208810271459426	0.921983293502757	0.612322418552065	1.3882444407446	0.698802424195841
5105_2_RTN4R_Nogo_Receptor	55	Weighted mode	-0.142528	0.107534226241145	0.867163118434502	0.702369779571883	1.07062105438449	0.190611849436008
5124_69_ICAM5_sICAM_5	85	MR Egger	0.290048833184651	0.0781249485072875	1.33649275162927	1.14674091733473	1.55764292365979	0.000370326199129792
5124_69_ICAM5_sICAM_5	85	Weighted median	0.136024807499267	0.0651520430558089	1.14571031545013	1.00836156735959	1.30176731186418	0.0368153643073618
5124_69_ICAM5_sICAM_5	85	Inverse variance weighted	0.125715539768574	0.0459670636170431	1.13395955600229	1.03626209063326	1.24086781353076	0.00623983326958443
5124_69_ICAM5_sICAM_5	85	Simple mode	0.0256029429374243	0.115067149757735	1.02593351344407	0.818789154744254	1.28548304274554	0.824461402323517
5124_69_ICAM5_sICAM_5	85	Weighted mode	0.148988950741966	0.0585527455776362	1.16066016470459	1.03481800368986	1.30180574084389	0.0127719930741214
5346_24_CPNE1_CPNE1	52	MR Egger	0.0382061107790819	0.0819296122586037	1.03894534864719	0.884815677880267	1.2199234987128	0.643005786785054
5346_24_CPNE1_CPNE1	52	Weighted median	0.0778715346093989	0.0840902549800582	1.08098378074614	0.916727179515532	1.27467141844072	0.354421516851077
5346_24_CPNE1_CPNE1	52	Inverse variance weighted	0.15603662235314	0.0521801518044849	1.16886900903966	1.05523503574924	1.29473976318772	0.00278663104015406
5346_24_CPNE1_CPNE1	52	Simple mode	0.331721776599911	0.135533017158357	1.39336512779511	1.06830904106097	1.81732654572253	0.0178664107151275
5346_24_CPNE1_CPNE1	52	Weighted mode	0.0921393949042697	0.0742821698935995	1.09651766040243	0.947949869796142	1.26836979241633	0.220504859111222
5353_89_IL1RN_IL_1Ra	18	MR Egger	0.596039111552487	0.340693191311664	1.81491586551184	0.930791905924634	3.53883567091664	0.0993584884419504
5353_89_IL1RN_IL_1Ra	18	Weighted median	0.393245193205205	0.208614672087659	1.48178166758725	0.984482098818448	2.23028627237901	0.0594256077940421
5353_89_IL1RN_IL_1Ra	18	Inverse variance weighted	0.37911614573292	0.149037054597405	1.4609927139591	1.09090051828718	1.95664011012931	0.0109662935634151
5353_89_IL1RN_IL_1Ra	18	Simple mode	0.186387407195383	0.353757012156445	1.20488895262171	0.602314023093265	2.41029983113151	0.605084850903886
5353_89_IL1RN_IL_1Ra	18	Weighted mode	0.412295533730823	0.22794278563247	1.51028070927374	0.966115075480017	2.36094837840214	0.0882080611886902
5491_12_SPOCK2_Testican_2	12	MR Egger	-0.712302	0.493717469119177	0.490513747194705	0.186376172853123	1.29095759669131	0.179677231359648
5491_12_SPOCK2_Testican_2	12	Weighted median	-0.413054	0.235484422571238	0.661626407936115	0.417027259403071	1.04969	0.0794199250940677
5491_12_SPOCK2_Testican_2	12	Inverse variance weighted	-0.603598	0.201458259382114	0.546840648638364	0.368447876119806	0.811606510403636	0.00273417806779494
5491_12_SPOCK2_Testican_2	12	Simple mode	-0.799514	0.39835021387492	0.449547417672219	0.205917359117891	0.981427120090732	0.0699519882179137
5491_12_SPOCK2_Testican_2	12	Weighted mode	-0.453981	0.239981108504684	0.635094794473782	0.39679163645961	1.01651688419283	0.0851321344958204
5620_13_PAM_AMD	84	MR Egger	0.133716477471683	0.0572900714483593	1.14306868797305	1.02165916430249	1.27890599044983	0.0220420629300145
5620_13_PAM_AMD	84	Weighted median	0.171640626016438	0.0517177551186801	1.1872510893847	1.07280190207447	1.31391000194863	0.000904067798696774
5620_13_PAM_AMD	84	Inverse variance weighted	0.154530031541973	0.0350874699835159	1.16710932762396	1.08954327032095	1.25019741733212	1.06205719108449e-05
5620_13_PAM_AMD	84	Simple mode	0.0920039514250703	0.0749042352292161	1.09636915429282	0.946666559571032	1.26974520260802	0.222810597563674
5620_13_PAM_AMD	84	Weighted mode	0.132081472040035	0.0433705770268595	1.14120129147717	1.04820076904519	1.2424531884817	0.00311359320316548
5644_60_RNASE4_RNAS4	42	MR Egger	0.048034989833879	0.152553427408631	1.04920736627366	0.77804592429657	1.41487290539846	0.754494630869378
5644_60_RNASE4_RNAS4	42	Weighted median	0.084163358585545	0.123051048546198	1.08780658183955	0.854689788314943	1.38450602273654	0.49399342774015
5644_60_RNASE4_RNAS4	42	Inverse variance weighted	0.20647116100855	0.0817591867796881	1.22933228100271	1.04730809683683	1.44299262239998	0.0115580703456143
5644_60_RNASE4_RNAS4	42	Simple mode	0.230914636893379	0.206736708728901	1.25975169854073	0.840053824665177	1.88913411900573	0.270518518183345
5644_60_RNASE4_RNAS4	42	Weighted mode	0.11872564929594	0.117235772727596	1.12606094029434	0.894888217415356	1.41695154386868	0.317138833481903
5649_83_PSG4_PSG4	88	MR Egger	-0.164545	0.107499870885927	0.848279530792293	0.687121044731014	1.0472363899768	0.129525300332779
5649_83_PSG4_PSG4	88	Weighted median	-0.133927	0.0957192446065589	0.874654035051082	0.725034108698752	1.0551499189523	0.161764002999778
5649_83_PSG4_PSG4	88	Inverse variance weighted	-0.120975	0.0590798855273197	0.886056065234044	0.789171492926905	0.994834909490014	0.0405941009945971
5649_83_PSG4_PSG4	88	Simple mode	-0.175375	0.149998052827793	0.839142180074096	0.625395326577841	1.12594317298894	0.245523476611326
5649_83_PSG4_PSG4	88	Weighted mode	-0.175375	0.099648229395133	0.839142180074096	0.690260889069985	1.02013544375699	0.0819325189036391
5736_1_TREML2_TRML2	91	MR Egger	-0.135092	0.0943992765206993	0.873635100528357	0.726065478391046	1.0511976007543	0.155910609317212
5736_1_TREML2_TRML2	91	Weighted median	-0.130024	0.0833591023979717	0.878074389207296	0.745717971992934	1.03392255777506	0.118805917163168
5736_1_TREML2_TRML2	91	Inverse variance weighted	-0.226605	0.0554515477011841	0.797235541171451	0.715130566386559	0.888767083916499	4.37849216015675e-05
5736_1_TREML2_TRML2	91	Simple mode	-0.191982	0.150424181674985	0.825321451521169	0.614581502584445	1.10832411238641	0.20514268746884
5736_1_TREML2_TRML2	91	Weighted mode	-0.191982	0.0782736489739565	0.825321451521169	0.707938054812972	0.962168220383295	0.0161069101863188
5737_61_SEMA4D_SEM4D	73	MR Egger	0.154041517097654	0.0696004102960837	1.16653931709984	1.01778094466697	1.33704014156506	0.0300970798518934
5737_61_SEMA4D_SEM4D	73	Weighted median	0.131790756442947	0.0653276531501605	1.14086957468228	1.00375559089283	1.29671346117035	0.0436557841408813
5737_61_SEMA4D_SEM4D	73	Inverse variance weighted	0.129126848255356	0.0433321411384173	1.13783444732649	1.04518703642271	1.2386943048528	0.00288312067894687
5737_61_SEMA4D_SEM4D	73	Simple mode	0.0532224116009217	0.111220888272427	1.05466418858641	0.848088293079247	1.31155748730834	0.633723743409912
5737_61_SEMA4D_SEM4D	73	Weighted mode	0.142189548016434	0.0638984359144112	1.15279513786098	1.01709305625635	1.3066027947997	0.0291979749470045
5742_14_ACP6_PPA6	81	MR Egger	0.0293088412438632	0.0717927799321279	1.02974257234717	0.894576365481435	1.18533174608687	0.6842002839037
5742_14_ACP6_PPA6	81	Weighted median	0.1154109401676	0.0575515338186404	1.12233455516978	1.00261334272547	1.25635157647513	0.0449256953088325
5742_14_ACP6_PPA6	81	Inverse variance weighted	0.0819921162506187	0.0408304604915149	1.08544725240171	1.00196634441186	1.17588354570733	0.0446314471312835
5742_14_ACP6_PPA6	81	Simple mode	0.0364060502754202	0.104417692980553	1.03707686635474	0.845140301637805	1.27260340637393	0.728262099514599
5742_14_ACP6_PPA6	81	Weighted mode	0.0618529733572792	0.0552418721046212	1.06380592541569	0.95463988253438	1.18545544519379	0.266202445055466
6207_10_PSAP_prosaposin	45	MR Egger	-0.27095	0.154795850992045	0.762654642420762	0.563070830737155	1.0329821256137	0.0871873069403524
6207_10_PSAP_prosaposin	45	Weighted median	-0.14203	0.113058609377812	0.867595652708223	0.695152255233169	1.08281633402128	0.209026521218353
6207_10_PSAP_prosaposin	45	Inverse variance weighted	-0.164815	0.0788738543838576	0.848050315682958	0.72657899733765	0.989829516907641	0.0366531717215533
6207_10_PSAP_prosaposin	45	Simple mode	-0.203146	0.17739845485581	0.816159294687501	0.576461513431956	1.15552552734889	0.2583426998207
6207_10_PSAP_prosaposin	45	Weighted mode	-0.161319	0.103775911782338	0.851020694863136	0.694391317364333	1.04297995233334	0.127231290058865
6367_66_FMOD_fibromodulin	9	MR Egger	-0.550396	0.377294549290448	0.576721491142439	0.275300202866484	1.20816357882187	0.187985288209945
6367_66_FMOD_fibromodulin	9	Weighted median	-0.490425	0.300424043063228	0.612366223404048	0.339848314211664	1.10341106865866	0.102586445647364
6367_66_FMOD_fibromodulin	9	Inverse variance weighted	-0.502658	0.227728657576731	0.604920864246988	0.38712571209158	0.945246571260442	0.0272955089839284
6367_66_FMOD_fibromodulin	9	Simple mode	-0.513428	0.407842618063472	0.598440731717192	0.269065800348002	1.33101757605393	0.243562347060243
6367_66_FMOD_fibromodulin	9	Weighted mode	-0.484463	0.317518360709183	0.616027612193191	0.330615411324791	1.1478291875863	0.165576783667575
6375_75_XXYLT1_XXLT1	32	MR Egger	-0.0103933	0.279151588089315	0.989660484879689	0.572621435352766	1.71042824257691	0.970546769280522
6375_75_XXYLT1_XXLT1	32	Weighted median	0.445837002518445	0.166042910860944	1.56179687682794	1.12793992900656	2.16253492029302	0.00725144029306973
6375_75_XXYLT1_XXLT1	32	Inverse variance weighted	0.360525991471483	0.113834601637225	1.43408353192049	1.14729864210191	1.79255470289562	0.00153965388202539
6375_75_XXYLT1_XXLT1	32	Simple mode	0.319427712672245	0.27648401880584	1.37633987703819	0.800530245349078	2.36632090808695	0.256786720971244
6375_75_XXYLT1_XXLT1	32	Weighted mode	0.407430425152125	0.190467453708053	1.50295087431793	1.03470277947237	2.18310163597405	0.0404113489080271
6382_17_MANBA_MANBA	53	MR Egger	0.146079730074008	0.131707970797152	1.15728845506669	0.893983560492623	1.49814451564705	0.272581896915131
6382_17_MANBA_MANBA	53	Weighted median	0.249752905604032	0.113182197998778	1.28370818039827	1.02830909460657	1.60254022945494	0.0273388863810019
6382_17_MANBA_MANBA	53	Inverse variance weighted	0.209913427637505	0.0757848662182076	1.23357126215547	1.06329767156154	1.43111200138443	0.00560804870923936
6382_17_MANBA_MANBA	53	Simple mode	0.0361803239007989	0.189413919527991	1.03684279717228	0.7152873289259	1.50295264933934	0.849260065329116
6382_17_MANBA_MANBA	53	Weighted mode	0.209500207960807	0.10184821077107	1.23306163153929	1.00992666049915	1.50549643517963	0.0447197744155226
6385_63_VWA1_VWA1	40	MR Egger	-0.163787	0.0932305564951559	0.848923208355312	0.707145781509914	1.01912594620233	0.0870096106723659
6385_63_VWA1_VWA1	40	Weighted median	-0.140702	0.105943542927364	0.868748438047567	0.705851061937078	1.06923951709995	0.184151120009073
6385_63_VWA1_VWA1	40	Inverse variance weighted	-0.172123	0.0738047747719818	0.841875319518541	0.72849048767937	0.972907766952736	0.01969312439172
6385_63_VWA1_VWA1	40	Simple mode	-0.114852	0.190345996734924	0.891497845239823	0.613895591146338	1.29463123620608	0.549744820835598
6385_63_VWA1_VWA1	40	Weighted mode	-0.148925	0.0989491339486896	0.861633417730019	0.709733543120839	1.04604348173341	0.14036276142371
6431_68_PCYOX1_PCYOX	77	MR Egger	-0.130142	0.0835940866045873	0.877971163449444	0.745286970787831	1.03427725703287	0.123721555851633
6431_68_PCYOX1_PCYOX	77	Weighted median	-0.0967131	0.0808159971140725	0.907816457389661	0.774829390932129	1.06362862580119	0.231420822099287
6431_68_PCYOX1_PCYOX	77	Inverse variance weighted	-0.11435	0.0529235953355202	0.89194538939611	0.804060617468396	0.989436070342356	0.0307209184899164
6431_68_PCYOX1_PCYOX	77	Simple mode	-0.137721	0.142907602084823	0.871341904441273	0.658480917585756	1.15301247789989	0.338250034274881
6431_68_PCYOX1_PCYOX	77	Weighted mode	-0.123423	0.0699070330538114	0.883889716947219	0.770711809296237	1.01368763563962	0.0814912819924553
6433_57_FAM20A_FA20A	12	MR Egger	-0.209978	0.40145914488897	0.810601911599844	0.369044468810814	1.78047773268799	0.612339859214349
6433_57_FAM20A_FA20A	12	Weighted median	-0.614826	0.239170600126157	0.540734952624603	0.338375038372635	0.864113057500217	0.0101505236988556
6433_57_FAM20A_FA20A	12	Inverse variance weighted	-0.537161	0.190435657554402	0.584404901812357	0.402357170830842	0.848820684758955	0.00479195007638155
6433_57_FAM20A_FA20A	12	Simple mode	-0.574463	0.340363165910716	0.563007167821495	0.28892887609617	1.09707646844158	0.119566106816023
6433_57_FAM20A_FA20A	12	Weighted mode	-0.589903	0.270282585537453	0.554381312905718	0.326391921596903	0.941624531009788	0.0516359324449205
6544_33_NELL1_NELL1	91	MR Egger	-0.0664605	0.0935342005127804	0.935699915812924	0.778966303863702	1.12396945555877	0.479222768723814
6544_33_NELL1_NELL1	91	Weighted median	-0.176797	0.0876278234733158	0.837949840662763	0.705712343270331	0.994966209904847	0.0436339602411344
6544_33_NELL1_NELL1	91	Inverse variance weighted	-0.150668	0.0596221992889887	0.860132857824016	0.765268959093758	0.966756229057851	0.0115024372361282
6544_33_NELL1_NELL1	91	Simple mode	-0.110012	0.17188909574324	0.895823177810268	0.639598361787686	1.25469234107963	0.523786454939133
6544_33_NELL1_NELL1	91	Weighted mode	-0.129092	0.0855772778763355	0.878893429763435	0.743175473231435	1.03939606284717	0.134934238311038
6556_5_ENPP5_ENPP5	126	MR Egger	-0.128067	0.0566038524635255	0.879794588514864	0.787406715562228	0.983022499912713	0.0254059966106544
6556_5_ENPP5_ENPP5	126	Weighted median	-0.0904383	0.0583286655567151	0.91353065142604	0.814840790107692	1.02417338604832	0.121022565200797
6556_5_ENPP5_ENPP5	126	Inverse variance weighted	-0.145207	0.0378248472749835	0.864843203432153	0.803045618269637	0.931396360937056	0.000123570118149815
6556_5_ENPP5_ENPP5	126	Simple mode	-0.254856	0.121308668189131	0.775028329994278	0.611022995230905	0.98305451183016	0.0376598310823502
6556_5_ENPP5_ENPP5	126	Weighted mode	-0.101368	0.0470608853116284	0.903600300175971	0.823981255592238	0.990912714259803	0.0331606864981106
6626_81_CHST12_CHSTC	11	MR Egger	-0.834105	0.419438418701907	0.434262771304911	0.190861973325575	0.988065622792927	0.0779691874640456
6626_81_CHST12_CHSTC	11	Weighted median	-0.683287	0.234511512279584	0.504954296636876	0.318883349194524	0.799599108376464	0.00357216081159913
6626_81_CHST12_CHSTC	11	Inverse variance weighted	-0.579997	0.186139041781112	0.55989987600336	0.388745719694908	0.80640854745515	0.00183362187440292
6626_81_CHST12_CHSTC	11	Simple mode	-0.578566	0.334285258996789	0.560702109634969	0.29119427555013	1.07964641528464	0.114176048331833
6626_81_CHST12_CHSTC	11	Weighted mode	-0.702867	0.24878998867455	0.495163498104798	0.304070514296462	0.80634878532263	0.0180012268934521
6649_51_NTN1_NET1	43	MR Egger	-0.298037	0.161412352976637	0.742274212893484	0.540962803943092	1.01850072335953	0.0720571497999663
6649_51_NTN1_NET1	43	Weighted median	-0.193238	0.130294956405742	0.824285625465706	0.638511054232335	1.0641112441918	0.138052479454928
6649_51_NTN1_NET1	43	Inverse variance weighted	-0.186838	0.0941954928421897	0.829578129665571	0.689725800541905	0.997787631952756	0.0473101560362134
6649_51_NTN1_NET1	43	Simple mode	-0.0988957	0.28737961541579	0.905837162458786	0.515736260261295	1.59100887045573	0.732466177530441
6649_51_NTN1_NET1	43	Weighted mode	-0.23969	0.121405150553703	0.786871459665825	0.62024267358704	0.998265228117583	0.0549474671594987
6947_4_ST3GAL6_SIA10	70	MR Egger	-0.134788	0.076032717645487	0.873900760011622	0.752907739000929	1.01433747959914	0.0807456152640526
6947_4_ST3GAL6_SIA10	70	Weighted median	-0.086646	0.0639398073018595	0.917001674814993	0.808990582721566	1.03943369622995	0.175379981960764
6947_4_ST3GAL6_SIA10	70	Inverse variance weighted	-0.101731	0.0504973608796523	0.903272129386209	0.818152739386977	0.997247213689257	0.0439477688710912
6947_4_ST3GAL6_SIA10	70	Simple mode	-0.155354	0.120488811420038	0.856112353948958	0.676034122444942	1.08415882904449	0.201577854933677
6947_4_ST3GAL6_SIA10	70	Weighted mode	-0.106362	0.0631224753145839	0.899099077637678	0.794468379151044	1.01750953546162	0.0965046627962479
7009_8_CD72_CD72	5	MR Egger	0.779899103344275	0.751939618346644	2.18125217334552	0.499622458581714	9.52291267536448	0.375911137555496
7009_8_CD72_CD72	5	Weighted median	0.658045609145092	0.459408156087161	1.93101468666007	0.784746630662964	4.7516199170511	0.152035999108615
7009_8_CD72_CD72	5	Inverse variance weighted	0.911025023203488	0.368946369981139	2.48687032717729	1.20670093753753	5.12515059184044	0.0135392282658552
7009_8_CD72_CD72	5	Simple mode	0.777407978171825	0.70128394527395	2.17582516363583	0.550400791364526	8.60139595906838	0.32978681314483
7009_8_CD72_CD72	5	Weighted mode	0.827259079146615	0.65437926620627	2.28704154168764	0.634242260855824	8.24694180161857	0.274810236028248
7049_2_ADAM23_ADAM_23	108	MR Egger	0.088878961982943	0.07202026240071	1.09294836001781	0.949062377969191	1.25864868884771	0.219901181618724
7049_2_ADAM23_ADAM_23	108	Weighted median	0.0512017308907618	0.074833836215983	1.0525352007316	0.908943277181156	1.21881131264291	0.493845337445201
7049_2_ADAM23_ADAM_23	108	Inverse variance weighted	0.0955142755253058	0.0460167426916204	1.10022452820492	1.0053356439661	1.20406952616171	0.037927090617173
7049_2_ADAM23_ADAM_23	108	Simple mode	0.169048090121762	0.130069232570606	1.18417708477489	0.917697369362158	1.52803681793334	0.196504507084059
7049_2_ADAM23_ADAM_23	108	Weighted mode	0.0549011930844028	0.0737058062587533	1.05643622631339	0.914331403662199	1.22062689282802	0.457983663541906
7156_2_FUT10_FUT10	95	MR Egger	-0.112481	0.0795124898430471	0.893614638102044	0.764659126748322	1.0443177796439	0.160516823592268
7156_2_FUT10_FUT10	95	Weighted median	-0.107789	0.064803407259714	0.897816607431125	0.790725711443253	1.01941121796567	0.0962463859232359
7156_2_FUT10_FUT10	95	Inverse variance weighted	-0.0903721	0.0425785554170111	0.913591206149014	0.840443093264942	0.99310577794194	0.0337975818311681
7156_2_FUT10_FUT10	95	Simple mode	0.0459459957623243	0.122119268057418	1.04701786602843	0.82414584396589	1.33016069887273	0.707587291314044
7156_2_FUT10_FUT10	95	Weighted mode	-0.0774605	0.054341252387947	0.925463591912769	0.831961310327145	1.0294743869992	0.157340707552994
7173_141_TMEM132C_T132C	44	MR Egger	0.222170659349584	0.196308801645952	1.24878447642665	0.849935689411076	1.8348007831566	0.264164007927258
7173_141_TMEM132C_T132C	44	Weighted median	0.152436084730542	0.142505747254288	1.16466801964533	0.880843612734162	1.53994599764891	0.284761674956099
7173_141_TMEM132C_T132C	44	Inverse variance weighted	0.21932022221704	0.107267104568456	1.24522996314952	1.00911801539558	1.53658703686655	0.0408925616430766
7173_141_TMEM132C_T132C	44	Simple mode	0.385049302065472	0.283431796751741	1.46968677824876	0.843262467941805	2.56145542849926	0.181381672572374
7173_141_TMEM132C_T132C	44	Weighted mode	0.309303927611788	0.157811044819184	1.36247640178138	0.999994279782547	1.85635256415146	0.0565012098015967
7808_5_GLCE_GLCE	84	MR Egger	0.0726609121407169	0.104054042244842	1.07536583158684	0.876967793600213	1.31864782285453	0.48696538221314
7808_5_GLCE_GLCE	84	Weighted median	0.0971506152581307	0.0903768652856326	1.10202634310406	0.923127386276394	1.31559531105893	0.282397095143202
7808_5_GLCE_GLCE	84	Inverse variance weighted	0.129754119216221	0.0597922813487194	1.1385484017316	1.01264047161478	1.28011125312666	0.0300006779525933
7808_5_GLCE_GLCE	84	Simple mode	0.191008423862983	0.145713419895327	1.21046964886882	0.909745963773904	1.6105999137983	0.193523863550695
7808_5_GLCE_GLCE	84	Weighted mode	0.137481742778725	0.0892842982941118	1.14738075779646	0.963179505778045	1.36680919336853	0.127408208016386
7871_16_TMEM132A_T132A	75	MR Egger	-0.0526697	0.0976199807956205	0.948693266891797	0.783483785653992	1.14873968182323	0.591157214449263
7871_16_TMEM132A_T132A	75	Weighted median	0.132765959224297	0.0835714882522633	1.14198269653622	0.969442458537197	1.34523144484092	0.112139123874729
7871_16_TMEM132A_T132A	75	Inverse variance weighted	0.140810417421979	0.0597196410012503	1.15120637862227	1.02404443687297	1.29415880645518	0.0183807356542627
7871_16_TMEM132A_T132A	75	Simple mode	0.219478435147067	0.154301513079176	1.24542699021625	0.920394836876798	1.68524238273919	0.159111919024578
7871_16_TMEM132A_T132A	75	Weighted mode	0.0753574291801016	0.0803570953479251	1.07826948699401	0.92114070733533	1.26220139586022	0.351407230235029
7905_30_HP_HPT	77	MR Egger	-0.170027	0.0856200820979057	0.843641891512929	0.713307600397801	0.997790631585294	0.0507069792779753
7905_30_HP_HPT	77	Weighted median	-0.12622	0.0599201347821432	0.88142092167655	0.783751358142179	0.991261875463572	0.0351635120944584
7905_30_HP_HPT	77	Inverse variance weighted	-0.1023	0.0429995522917867	0.902758424128921	0.829792665723373	0.982140245389226	0.0173549097825653
7905_30_HP_HPT	77	Simple mode	-0.165086	0.100865791764398	0.847820628944196	0.695737294804135	1.03314832226392	0.105829602261322
7905_30_HP_HPT	77	Weighted mode	-0.131928	0.0728120811085764	0.876404219404443	0.759845971157298	1.0108421771587	0.0739526084948955
7957_2_SCG3_SCG3	57	MR Egger	-0.142919	0.139308462510748	0.866824183537989	0.659704219661273	1.13897128860582	0.309421127489752
7957_2_SCG3_SCG3	57	Weighted median	-0.0404083	0.123873657045214	0.960397263296458	0.753368622847491	1.2243181828586	0.744268905130263
7957_2_SCG3_SCG3	57	Inverse variance weighted	-0.257539	0.079241175444952	0.772951182307363	0.661760156660481	0.902824874264644	0.00115376508479536
7957_2_SCG3_SCG3	57	Simple mode	-0.130238	0.240823802118713	0.877886574804466	0.547576811739792	1.40745	0.590789136733741
7957_2_SCG3_SCG3	57	Weighted mode	-0.0624226	0.135468524445525	0.939485738105493	0.720405559507057	1.22518967331064	0.646733310168774
8244_16_FUT8_FUT8	91	MR Egger	0.0865268476780351	0.0887986152745186	1.09038064151321	0.916201978324828	1.29767231627308	0.332490748802171
8244_16_FUT8_FUT8	91	Weighted median	0.0922134692152374	0.0793720450490854	1.09659888720096	0.938609514205462	1.28118147239146	0.245321693319338
8244_16_FUT8_FUT8	91	Inverse variance weighted	0.12274217516968	0.0521658217442464	1.13059288844732	1.02070867407166	1.25230666876641	0.0186264779030341
8244_16_FUT8_FUT8	91	Simple mode	0.132941664399991	0.141596279514794	1.14218336643541	0.865379583501063	1.50752671710115	0.35030618370351
8244_16_FUT8_FUT8	91	Weighted mode	0.0750678561068234	0.0787600399539516	1.07795729438831	0.923761070763736	1.25789228979335	0.343081583585504
8245_27_ICAM5_sICAM_5	80	MR Egger	0.248556182931634	0.0791889490664775	1.28217285657569	1.09784135010481	1.49745428515925	0.00239527964902299
8245_27_ICAM5_sICAM_5	80	Weighted median	0.139951358090549	0.0657210567645944	1.15021784870403	1.01120034625667	1.30834715828066	0.0332149676129856
8245_27_ICAM5_sICAM_5	80	Inverse variance weighted	0.132209273897268	0.0467485347572862	1.1413471484419	1.0414168541814	1.25086636347979	0.00468259820986663
8245_27_ICAM5_sICAM_5	80	Simple mode	0.0228170200870927	0.107675723686912	1.02307931945421	0.828426303046585	1.26346941187843	0.832726935988331
8245_27_ICAM5_sICAM_5	80	Weighted mode	0.146543583588228	0.060887980259261	1.15782539190393	1.02757652580094	1.30458375067745	0.0184282191724857
8275_31_PEAR1_PEAR1	23	MR Egger	-0.509663	0.309709974802963	0.60069773788309	0.327359948496632	1.10226609563868	0.114729071118167
8275_31_PEAR1_PEAR1	23	Weighted median	-0.316107	0.19923577797454	0.728981795165346	0.493314368207465	1.07723288014794	0.112604365939265
8275_31_PEAR1_PEAR1	23	Inverse variance weighted	-0.28607	0.142501291129629	0.751210240971604	0.568148614647077	0.993255658101284	0.044697662581003
8275_31_PEAR1_PEAR1	23	Simple mode	0.0141336382598833	0.365944245091071	1.01423399034778	0.495039816577229	2.07795525274948	0.969539798195062
8275_31_PEAR1_PEAR1	23	Weighted mode	-0.357132	0.214238414882703	0.6996804371082	0.459765427508356	1.06478800880048	0.109692683282111
8428_102_NTM_NTRI	90	MR Egger	-0.116695	0.103484076483106	0.889856653452964	0.726494996830288	1.08995226002842	0.262528626927398
8428_102_NTM_NTRI	90	Weighted median	-0.117513	0.0977882522667679	0.889128900715984	0.734050073078989	1.07697040172264	0.229476150448203
8428_102_NTM_NTRI	90	Inverse variance weighted	-0.119756	0.0599845476023297	0.887136655815949	0.788734152963506	0.997815858658169	0.0458847938722538
8428_102_NTM_NTRI	90	Simple mode	-0.290242	0.215896754056436	0.748082297233896	0.489975483907789	1.1421533154505	0.182249608568682
8428_102_NTM_NTRI	90	Weighted mode	-0.170237	0.0835101155484671	0.843464972648936	0.71611341012515	0.993464373137963	0.0444655837465827
8465_52_CTSH_Cathepsin_H	152	MR Egger	-0.0762865	0.0629763595993614	0.92655067505706	0.818959862377106	1.04827622559771	0.227665449384196
8465_52_CTSH_Cathepsin_H	152	Weighted median	-0.132627	0.0647253411115669	0.875791547917822	0.771445814242483	0.994251081856549	0.0404546351155251
8465_52_CTSH_Cathepsin_H	152	Inverse variance weighted	-0.0986565	0.0385915821357193	0.906053923498928	0.840048242298992	0.977245913926468	0.0105754093185021
8465_52_CTSH_Cathepsin_H	152	Simple mode	-0.0702742	0.127530417402079	0.932138221957032	0.725979293016355	1.19684083718576	0.582421692845871
8465_52_CTSH_Cathepsin_H	152	Weighted mode	-0.153589	0.0603228219133398	0.85762466423235	0.76199029436531	0.965261723329813	0.0118947839761865
8794_13_DPEP1_DPEP1	92	MR Egger	0.0144972515288211	0.11693632929591	1.01460284634089	0.806785089675787	1.27595186001356	0.901611061099349
8794_13_DPEP1_DPEP1	92	Weighted median	0.137572924377333	0.0793203829281174	1.14748538257803	0.982264138983275	1.34049758203853	0.0828479124822598
8794_13_DPEP1_DPEP1	92	Inverse variance weighted	0.120641143978495	0.0610157295818799	1.12821997118366	1.00105086577092	1.27154408122648	0.0480174657209325
8794_13_DPEP1_DPEP1	92	Simple mode	0.184536252664146	0.169932862783629	1.20266058014467	0.861972287082284	1.67800344942627	0.280375505699827
8794_13_DPEP1_DPEP1	92	Weighted mode	0.143300846305027	0.080502929357811	1.15407694923025	0.985619506169702	1.35132634491031	0.0784023813539845
8814_33_PSAPL1_SAPL1	52	MR Egger	0.0740776785286592	0.121764585246946	1.07689045351331	0.848249123556694	1.36716091612983	0.545697317198074
8814_33_PSAPL1_SAPL1	52	Weighted median	0.164081073155502	0.107845168886139	1.17830984051733	0.953805546607951	1.45565737712223	0.128146854392003
8814_33_PSAPL1_SAPL1	52	Inverse variance weighted	0.153367519574643	0.0743075281560786	1.16575333739356	1.00775467735509	1.34852347915758	0.0390218233197663
8814_33_PSAPL1_SAPL1	52	Simple mode	0.0673836794904985	0.205014090636903	1.06970582363439	0.715735969180108	1.59873277072846	0.743744699279247
8814_33_PSAPL1_SAPL1	52	Weighted mode	0.168550574182075	0.0999614458916179	1.1835880843305	0.972997408934259	1.43975794848576	0.0978750110852213
8841_65_CILP2_CILP2	5	MR Egger	0.861316796439334	2.08621806215647	2.36627454499705	0.039649751217408	141.217915633293	0.70744246725795
8841_65_CILP2_CILP2	5	Weighted median	1.77625059469257	0.580291957179728	5.9076646124985	1.89435490039076	18.4234227528157	0.00220628407668844
8841_65_CILP2_CILP2	5	Inverse variance weighted	1.20192549128844	0.578210973884932	3.32651593759453	1.07104197439246	10.331722329881	0.0376451970517855
8841_65_CILP2_CILP2	5	Simple mode	1.9315022733991	0.798428107345552	6.89986794765522	1.44279641169531	32.9971555994788	0.072831461256739
8841_65_CILP2_CILP2	5	Weighted mode	1.86830148087897	0.641721225576541	6.47728525775409	1.84140317987469	22.784377027726	0.043617381931485
8900_28_NEO1_NEO1	12	MR Egger	1.52775806000918	0.48699282697121	4.60783474448799	1.77402702755398	11.9683300776908	0.0105616680621294
8900_28_NEO1_NEO1	12	Weighted median	0.666974662897652	0.269047509504681	1.94833402819043	1.14986155051201	3.30127177808011	0.013174322419781
8900_28_NEO1_NEO1	12	Inverse variance weighted	0.550826085362633	0.229548592832703	1.73468542437876	1.10617801430775	2.72029771215012	0.0164127456951332
8900_28_NEO1_NEO1	12	Simple mode	0.650730370106685	0.353230305865243	1.91694039381147	0.959252417759946	3.8307544556491	0.0925382870628554
8900_28_NEO1_NEO1	12	Weighted mode	0.770679293948575	0.28487913408268	2.16123386834586	1.23653880589515	3.77742438119751	0.0204625745360044
8923_94_GALNT16_GLTL1	37	MR Egger	0.128743423825538	0.224526147063606	1.13739825743058	0.732473713736244	1.76617231682931	0.570039764416282
8923_94_GALNT16_GLTL1	37	Weighted median	-0.215782	0.139932396130951	0.805910865806831	0.612595991922597	1.06022946964952	0.123062521347264
8923_94_GALNT16_GLTL1	37	Inverse variance weighted	-0.388181	0.107157043415465	0.678289899653252	0.549795819522479	0.836814634878844	0.000291726166689667
8923_94_GALNT16_GLTL1	37	Simple mode	-0.585088	0.26397886171715	0.557056658565837	0.332044297669899	0.934550368821667	0.033069180820546
8923_94_GALNT16_GLTL1	37	Weighted mode	-0.117586	0.14729792144583	0.889063630836201	0.666116701496729	1.1866301173647	0.429937081631709
8958_51_CHL1_CHL1	43	MR Egger	-0.212597	0.204731646454786	0.808482194976497	0.541251813252276	1.20765130682223	0.305161914505923
8958_51_CHL1_CHL1	43	Weighted median	-0.265458	0.138980669982047	0.766854570944861	0.583996542591592	1.00696817547819	0.0561285595220519
8958_51_CHL1_CHL1	43	Inverse variance weighted	-0.276603	0.0936006347921787	0.758355126391774	0.63124530075313	0.911060243994747	0.00312521582821491
8958_51_CHL1_CHL1	43	Simple mode	-0.176952	0.227369269422612	0.837820228523304	0.536550016414015	1.30825219243159	0.44078004189196
8958_51_CHL1_CHL1	43	Weighted mode	-0.21272	0.160580665795502	0.808382639456177	0.590103181288592	1.10740377699226	0.192436513931201
9005_16_PLXNA1_PLXA1	20	MR Egger	-0.0915654	0.2581776025823	0.91250160202809	0.550133920299555	1.51355723211984	0.726965070742374
9005_16_PLXNA1_PLXA1	20	Weighted median	-0.396308	0.176582216429959	0.672799642188577	0.47596600453247	0.951032960796672	0.0248115639745116
9005_16_PLXNA1_PLXA1	20	Inverse variance weighted	-0.282672	0.130626782718736	0.753767359064685	0.583506320616578	0.973708786891943	0.0304672030717466
9005_16_PLXNA1_PLXA1	20	Simple mode	-0.193398	0.257372662569578	0.824153573345647	0.497654703130612	1.36486022976484	0.461598922371368
9005_16_PLXNA1_PLXA1	20	Weighted mode	-0.32274	0.178269484867201	0.72416229999631	0.510610642741568	1.02702723531237	0.0860778802088554
9015_1_PRG3_PRG3	3	MR Egger	3.59067	6.72180293263893	36.2584626603808	6.88169180601202e-05	19103966.7505263	0.687662503416728
9015_1_PRG3_PRG3	3	Weighted median	1.12181831465314	0.5947374199762	3.07043214228784	0.957081213536525	9.85031720093889	0.0592624385341275
9015_1_PRG3_PRG3	3	Inverse variance weighted	1.11912871501134	0.562535212696579	3.06218500481837	1.01669756991408	9.22297572180381	0.0466529206634396
9015_1_PRG3_PRG3	3	Simple mode	1.65267545018191	0.898378442183384	5.22092949480504	0.897496286262338	30.3712730703798	0.2071929395979
9015_1_PRG3_PRG3	3	Weighted mode	1.36742027983973	0.698388240988951	3.92521167548366	0.998580336178838	15.4291909615512	0.189345761950604
9267_2_CPA4_CBPA4	181	MR Egger	0.0844908673112673	0.0422830362153252	1.08816290633351	1.00161742294901	1.1821864152821	0.0472065579624455
9267_2_CPA4_CBPA4	181	Weighted median	0.0880763323643386	0.0504634236420968	1.09207147924477	0.989226476649136	1.20560877001562	0.0809239775341407
9267_2_CPA4_CBPA4	181	Inverse variance weighted	0.0628152832786232	0.0272186031310331	1.06483012913377	1.00951177323222	1.1231797726149	0.0210098725194812
9267_2_CPA4_CBPA4	181	Simple mode	0.186744148919571	0.0979211415697157	1.20531886346313	0.994832111165885	1.46034043967224	0.0581018737483219
9267_2_CPA4_CBPA4	181	Weighted mode	0.117133622729833	0.0425746985164475	1.12426964763343	1.03426105337656	1.22211141612969	0.00654399932530449
9329_28_TREML1_TRML1	7	MR Egger	-0.466213	0.3876615092649	0.627373897143186	0.293455535962724	1.34125262120332	0.282958650972362
9329_28_TREML1_TRML1	7	Weighted median	-0.48619	0.261374405028334	0.614964905313228	0.368437602079203	1.02644744356362	0.0628672951587855
9329_28_TREML1_TRML1	7	Inverse variance weighted	-0.451091	0.230064702217833	0.636932909325356	0.405750123511753	0.999835877979496	0.04991246131362
9329_28_TREML1_TRML1	7	Simple mode	-0.84059	0.435581877702431	0.431456073536938	0.183722271920611	1.01323776070193	0.101871263582005
9329_28_TREML1_TRML1	7	Weighted mode	-0.347912	0.287958406236908	0.706160728303712	0.401595111540705	1.2417057874169	0.272423106555211
9484_75_DSG2_Desmoglein_2	27	MR Egger	0.395802507540712	0.35390555704592	1.48557589854066	0.742410923190368	2.9726606672771	0.274034606881324
9484_75_DSG2_Desmoglein_2	27	Weighted median	0.294155025085642	0.210280465239852	1.34199192995578	0.888700774460832	2.02648899587047	0.161851983570476
9484_75_DSG2_Desmoglein_2	27	Inverse variance weighted	0.291153019472306	0.139091518249279	1.33796930364339	1.01870645765128	1.75728920146374	0.0363270366195229
9484_75_DSG2_Desmoglein_2	27	Simple mode	0.424152153429104	0.31152587920931	1.52829411128415	0.829909541877069	2.81438249920952	0.185028858668021
9484_75_DSG2_Desmoglein_2	27	Weighted mode	0.313505292947208	0.221344976353122	1.36821270462025	0.886627038135973	2.11137933377256	0.168538750145243
9748_31_GSTM3_GSTM3_3	122	MR Egger	-0.100652	0.0723554000831388	0.904247226501052	0.784688025843644	1.04202309670235	0.166773683574656
9748_31_GSTM3_GSTM3_3	122	Weighted median	-0.197297	0.0710608255711716	0.82094673545431	0.714211410453155	0.943633121214734	0.00549555634494746
9748_31_GSTM3_GSTM3_3	122	Inverse variance weighted	-0.0942773	0.0427328776552256	0.910030374329129	0.83691418398043	0.989534289241989	0.027369955129886
9748_31_GSTM3_GSTM3_3	122	Simple mode	-0.135435	0.138761988606992	0.873336320587892	0.665372630895972	1.14629952216541	0.331001565634141
9748_31_GSTM3_GSTM3_3	122	Weighted mode	-0.201502	0.0760448479673678	0.817501935072057	0.70430068039767	0.948897867696521	0.00913033824822242
9901_28_EGLN1_EGLN1	35	MR Egger	0.115639834980179	0.209146370464707	1.12259148113083	0.745062589685614	1.69141713857793	0.584049126252218
9901_28_EGLN1_EGLN1	35	Weighted median	0.305745418073275	0.18058049984169	1.35763663279884	0.952950458354812	1.9341794849435	0.0904316141005504
9901_28_EGLN1_EGLN1	35	Inverse variance weighted	0.322546991065222	0.122389605530791	1.3806397670686	1.08617610126284	1.75493289181657	0.00840353019227804
9901_28_EGLN1_EGLN1	35	Simple mode	0.0400778816353418	0.358508248944593	1.04089183739419	0.515510149897503	2.1017157807063	0.911646754672099
9901_28_EGLN1_EGLN1	35	Weighted mode	0.0702618576613268	0.301469393184063	1.07278906251216	0.594153156885776	1.93700287427233	0.817108648086928
