# Supplementary material for: TNFSF8 Drives Oral Squamous Cell Carcinoma Progression via CD8+ T Cell Regulation: Insights from Multi-Omics Integration and Single-Cell eQTL Analysis
Source: Research Square preprint supplement (doi:10.21203/rs.3.rs-7101139/v1), 2025-08-11
Supplement: Supplementary file 6 [file 6e3cc2beab92f75db95ee9c9.xlsx]

## Sheet: Sheet1
Table S3 Mendelian Randomization Analysis of UKB-PP cis-pQTL and OSCC: Replication Results
id	nsnp	method	beta	se	OR	OR_lci95	OR_uci95	pvalue
ACTA2_P62736_OID20079_v1_Cardiometabolic	3	MR Egger	-3.14597	5.40915893274445	0.0430251205518786	1.06992431764542e-06	1730.17938556396	0.66464092542798
ACTA2_P62736_OID20079_v1_Cardiometabolic	3	Weighted median	-1.04914	0.646524998028088	0.35023792074847	0.0986347566458812	1.24364478913462	0.104644796082137
ACTA2_P62736_OID20079_v1_Cardiometabolic	3	Inverse variance weighted	-1.13453	0.571783349445672	0.321572872165175	0.104849796461734	0.986259540811798	0.0472338260880732
ACTA2_P62736_OID20079_v1_Cardiometabolic	3	Simple mode	-0.994622	0.772154418335574	0.369863206286539	0.0814272973116422	1.6800114443317	0.326622214228227
ACTA2_P62736_OID20079_v1_Cardiometabolic	3	Weighted mode	-1.01718	0.7403962321047	0.361613951199279	0.0847241423511147	1.54341662332843	0.30320860559926
ACY3_Q96HD9_OID30086_v1_Cardiometabolic_II	38	MR Egger	0.404718587906334	0.220426162536017	1.49888063756258	0.97305303591169	2.30885993131405	0.0746167255074811
ACY3_Q96HD9_OID30086_v1_Cardiometabolic_II	38	Weighted median	0.129591273020237	0.148355376758699	1.13836300855113	0.85113437072692	1.52252145349368	0.38238013469268
ACY3_Q96HD9_OID30086_v1_Cardiometabolic_II	38	Inverse variance weighted	0.222448964175089	0.108739589227879	1.24913206753836	1.00936292982416	1.54585716995221	0.0407855458448294
ACY3_Q96HD9_OID30086_v1_Cardiometabolic_II	38	Simple mode	0.576243334576079	0.257844895490381	1.77934146892986	1.07343881340129	2.94945182112574	0.0315499618770553
ACY3_Q96HD9_OID30086_v1_Cardiometabolic_II	38	Weighted mode	0.240502489936349	0.163068648891073	1.27188810074567	0.923936380586345	1.75087741408321	0.148710813381274
ADAM12_O43184_OID30491_v1_Inflammation_II	20	MR Egger	-0.218781	0.46927989445233	0.803497844834458	0.320276892216777	2.0157832248998	0.646660878542991
ADAM12_O43184_OID30491_v1_Inflammation_II	20	Weighted median	-0.34077	0.211223491758398	0.711222454995765	0.470119638939174	1.07597585506452	0.106676095201392
ADAM12_O43184_OID30491_v1_Inflammation_II	20	Inverse variance weighted	-0.33357	0.162496582385606	0.716361837013954	0.520969811549802	0.985036503369352	0.0400938317197388
ADAM12_O43184_OID30491_v1_Inflammation_II	20	Simple mode	-0.283003	0.311327581492574	0.753517755220577	0.409341807312075	1.38707798052933	0.374727146778546
ADAM12_O43184_OID30491_v1_Inflammation_II	20	Weighted mode	-0.247223	0.271075679663328	0.780966484466105	0.459079732058283	1.32854623558488	0.373191851455962
AGRN_O00468_OID20786_v1_Inflammation	30	MR Egger	0.345408963607518	0.195370804463361	1.41256749025361	0.96317726035598	2.07163000690436	0.0879632728520339
AGRN_O00468_OID20786_v1_Inflammation	30	Weighted median	0.274960511322231	0.125054167852394	1.31647868783848	1.03030445127926	1.68213981156837	0.0278970349558236
AGRN_O00468_OID20786_v1_Inflammation	30	Inverse variance weighted	0.189004728175236	0.0857920930216824	1.20804666432572	1.02107115256945	1.4292605755398	0.0275908487968209
AGRN_O00468_OID20786_v1_Inflammation	30	Simple mode	-0.028885	0.197957689788678	0.971528147112111	0.659098616676637	1.43205723202749	0.884997870545311
AGRN_O00468_OID20786_v1_Inflammation	30	Weighted mode	0.274141239552257	0.113737626365072	1.31540057570749	1.05254968475337	1.64389263484224	0.0225071265571601
AGRP_O00253_OID20658_v1_Inflammation	5	MR Egger	-1.03541	0.831847315804214	0.355082271915025	0.0695418531921496	1.81305809438177	0.301616753376863
AGRP_O00253_OID20658_v1_Inflammation	5	Weighted median	-1.34613	0.527361287498759	0.260245080126468	0.0925728293829442	0.731613176149828	0.0106928582593182
AGRP_O00253_OID20658_v1_Inflammation	5	Inverse variance weighted	-1.2397	0.425975633232711	0.28947246660529	0.12560573887077	0.667121659216245	0.00361141094861289
AGRP_O00253_OID20658_v1_Inflammation	5	Simple mode	-1.49667	0.678918182703791	0.223874737280509	0.0591695498412294	0.847055590703403	0.0921901299581301
AGRP_O00253_OID20658_v1_Inflammation	5	Weighted mode	-1.44478	0.708619545371467	0.23579680487409	0.0587961354397619	0.945642647649752	0.111085926767366
AGT_P01019_OID30709_v1_Inflammation_II	44	MR Egger	-0.234365	0.0905583576218768	0.791073343703222	0.662417687786224	0.944716674473453	0.0132022560343973
AGT_P01019_OID30709_v1_Inflammation_II	44	Weighted median	-0.152219	0.0872694479141198	0.858800244224777	0.723780545489068	1.01900757636719	0.0811171157523835
AGT_P01019_OID30709_v1_Inflammation_II	44	Inverse variance weighted	-0.14297	0.0637927030343978	0.866779997832804	0.764904887150764	0.982223512052096	0.0250152752205432
AGT_P01019_OID30709_v1_Inflammation_II	44	Simple mode	-0.320152	0.160606849729731	0.726038915716463	0.529966708717733	0.994652113922678	0.0525878515889875
AGT_P01019_OID30709_v1_Inflammation_II	44	Weighted mode	-0.196055	0.0786286339708641	0.821966725576238	0.704570073393546	0.958924205651213	0.0165780721782997
AHSG_P02765_OID30706_v1_Inflammation_II	74	MR Egger	0.0777372251288359	0.0671074781331174	1.08083860412557	0.947627835860749	1.23277519291843	0.250529228389274
AHSG_P02765_OID30706_v1_Inflammation_II	74	Weighted median	0.0665304472418965	0.0698624179326389	1.06879350539417	0.932021037705353	1.22563709504365	0.340941471292794
AHSG_P02765_OID30706_v1_Inflammation_II	74	Inverse variance weighted	0.114999977161738	0.046065343089627	1.1218734119503	1.02501977460934	1.22787870401885	0.0125442189617946
AHSG_P02765_OID30706_v1_Inflammation_II	74	Simple mode	0.167791565983266	0.119664443887199	1.18269007211291	0.935428333372114	1.49531049763277	0.16509845627442
AHSG_P02765_OID30706_v1_Inflammation_II	74	Weighted mode	0.105737293414445	0.0584128338357787	1.1115298319403	0.991286325150081	1.24635893378856	0.0743845942168002
ANGPT2_O15123_OID21463_v1_Oncology	16	MR Egger	-0.113798	0.387614969123498	0.892437886858771	0.41747788682265	1.90775465489335	0.773381435944075
ANGPT2_O15123_OID21463_v1_Oncology	16	Weighted median	0.38169851676129	0.242938854629537	1.46477041482958	0.90986263782264	2.35810580517347	0.116142902138745
ANGPT2_O15123_OID21463_v1_Oncology	16	Inverse variance weighted	0.458153132915595	0.168469482475744	1.58115111080321	1.13649952602581	2.19977111995508	0.00653802545820196
ANGPT2_O15123_OID21463_v1_Oncology	16	Simple mode	0.661866586806045	0.476903878961201	1.93840716489376	0.761195529943945	4.93621177358751	0.185457098108871
ANGPT2_O15123_OID21463_v1_Oncology	16	Weighted mode	0.214260229429065	0.303841111845298	1.23894502280274	0.682994583574415	2.24743329807159	0.491509259292951
ANKMY2_Q8IV38_OID30518_v1_Inflammation_II	3	MR Egger	-1.48652	2.22504035834628	0.226158627811379	0.00288682575457588	17.7176349672134	0.625040710389733
ANKMY2_Q8IV38_OID30518_v1_Inflammation_II	3	Weighted median	-1.03286	0.498251957006331	0.355988278286432	0.134064894282915	0.945270982050732	0.0381757972129953
ANKMY2_Q8IV38_OID30518_v1_Inflammation_II	3	Inverse variance weighted	-1.11975	0.467734147160946	0.326361414275419	0.130483459499381	0.816285628358564	0.0166662995467487
ANKMY2_Q8IV38_OID30518_v1_Inflammation_II	3	Simple mode	-1.02816	0.63247291715229	0.357663286757505	0.103538661747923	1.23550975582073	0.245538654483181
ANKMY2_Q8IV38_OID30518_v1_Inflammation_II	3	Weighted mode	-1.01458	0.633390174958379	0.362554558169737	0.104766097807415	1.25465976494879	0.250356840484002
ANXA2_P07355_OID30263_v1_Cardiometabolic_II	51	MR Egger	-0.133715	0.112885252659983	0.874839645587756	0.701194642233296	1.09148638537012	0.241921663192917
ANXA2_P07355_OID30263_v1_Cardiometabolic_II	51	Weighted median	0.0774561338922569	0.0871734928427155	1.08053483256156	0.910825532552951	1.28186516808142	0.374256525879662
ANXA2_P07355_OID30263_v1_Cardiometabolic_II	51	Inverse variance weighted	0.18589002541524	0.0709920301883694	1.20428981182279	1.04785544921372	1.38407826379911	0.00883267929383265
ANXA2_P07355_OID30263_v1_Cardiometabolic_II	51	Simple mode	0.0917296913098538	0.163783847498118	1.09606850519216	0.795100585422997	1.51096124201071	0.577935514841688
ANXA2_P07355_OID30263_v1_Cardiometabolic_II	51	Weighted mode	0.0917296913098538	0.0898946549127068	1.09606850519216	0.919004893051525	1.30724675913865	0.312444622645462
AOC1_P19801_OID20452_v1_Inflammation	15	MR Egger	0.499350489738545	0.214541995550479	1.64765075700898	1.08204003261477	2.5089210521278	0.0367320420380448
AOC1_P19801_OID20452_v1_Inflammation	15	Weighted median	0.372911700388854	0.159339681933003	1.45195612701087	1.06248013354345	1.98420330715595	0.0192653273750892
AOC1_P19801_OID20452_v1_Inflammation	15	Inverse variance weighted	0.293082361958928	0.12980257667082	1.3405531964723	1.03942670054568	1.72891736534059	0.0239513546037621
AOC1_P19801_OID20452_v1_Inflammation	15	Simple mode	0.204279730578227	0.311372917869403	1.22664123453065	0.666302712491395	2.25820590257662	0.522421662641428
AOC1_P19801_OID20452_v1_Inflammation	15	Weighted mode	0.387028305428261	0.164559003384549	1.47259817320517	1.06661774795588	2.03310453429367	0.0338398690441314
APRT_P07741_OID20927_v1_Neurology	4	MR Egger	1.64680324192436	0.981178105426012	5.19036094978562	0.758580887326456	35.5134794972311	0.235275008126193
APRT_P07741_OID20927_v1_Neurology	4	Weighted median	1.06632650511176	0.51511577969042	2.90468951511032	1.05833781352393	7.97214374406467	0.0384456474279443
APRT_P07741_OID20927_v1_Neurology	4	Inverse variance weighted	1.04689822257363	0.460381159835296	2.84880105289446	1.15552079752804	7.02338500209955	0.0229671011899151
APRT_P07741_OID20927_v1_Neurology	4	Simple mode	1.20950127576441	0.744325752744504	3.35181260545898	0.779285971571192	14.4165917929492	0.202638532978568
APRT_P07741_OID20927_v1_Neurology	4	Weighted mode	1.19282543697342	0.692393151824021	3.29638178106618	0.848517015740317	12.8060282174359	0.183407215632897
AREG_P15514_OID21357_v1_Oncology	14	MR Egger	-0.954107	0.519774660632365	0.385155891806141	0.139057821865239	1.06678688766422	0.0913051324189377
AREG_P15514_OID21357_v1_Oncology	14	Weighted median	-0.491342	0.278710796556502	0.611804690975635	0.354298556607353	1.0564676962955	0.0779155918452824
AREG_P15514_OID21357_v1_Oncology	14	Inverse variance weighted	-0.420711	0.213541479310351	0.656579654380651	0.432033321692371	0.997832391394981	0.0488198324428869
AREG_P15514_OID21357_v1_Oncology	14	Simple mode	-0.828063	0.465687366553291	0.436894627607958	0.175378202797214	1.08837308507149	0.0987621276763344
AREG_P15514_OID21357_v1_Oncology	14	Weighted mode	-0.538539	0.30821997721242	0.583600247436204	0.31897256160076	1.06776973887144	0.104157535886541
ARSA_P15289_OID21138_v1_Neurology	42	MR Egger	-0.135721	0.123169199362922	0.873085865831576	0.685824852071614	1.11147755409026	0.277087098234668
ARSA_P15289_OID21138_v1_Neurology	42	Weighted median	-0.105459	0.10692850762465	0.89991147864025	0.729760593669375	1.1097347217893	0.324007526723173
ARSA_P15289_OID21138_v1_Neurology	42	Inverse variance weighted	-0.164653	0.0744671670337762	0.848188319926214	0.733000980203914	0.981476758542827	0.0270305498321242
ARSA_P15289_OID21138_v1_Neurology	42	Simple mode	-0.313029	0.177797499576804	0.731228427843342	0.516070197840508	1.03608969462618	0.0857650831724544
ARSA_P15289_OID21138_v1_Neurology	42	Weighted mode	-0.138202	0.107746993824356	0.870922868000416	0.705120922480301	1.07571143873874	0.206818386684957
ASGR2_P07307_OID30679_v1_Inflammation_II	28	MR Egger	-0.117037	0.197169590975939	0.889552372381153	0.604417984256685	1.30919900436464	0.557919018761366
ASGR2_P07307_OID30679_v1_Inflammation_II	28	Weighted median	-0.21947	0.137321933099646	0.802944486420625	0.6134719795208	1.05093609780986	0.109995579120634
ASGR2_P07307_OID30679_v1_Inflammation_II	28	Inverse variance weighted	-0.249825	0.0988556963093151	0.778937014231807	0.641733445270933	0.945474911135732	0.0114986024228555
ASGR2_P07307_OID30679_v1_Inflammation_II	28	Simple mode	-0.290664	0.252576794330847	0.747767086299948	0.455794035364139	1.22677255946713	0.259907296514154
ASGR2_P07307_OID30679_v1_Inflammation_II	28	Weighted mode	-0.173967	0.128008117776774	0.840325006673614	0.653859710736914	1.07996578661372	0.185382747344511
B3GNT7_Q8NFL0_OID30281_v1_Cardiometabolic_II	59	MR Egger	0.188121137484223	0.102617476802976	1.2069797169806	0.987075135766283	1.4758755280282	0.0719924828804344
B3GNT7_Q8NFL0_OID30281_v1_Cardiometabolic_II	59	Weighted median	0.203757028396874	0.0848352309246688	1.2260002340224	1.03819120790923	1.44778395576087	0.0163147459784
B3GNT7_Q8NFL0_OID30281_v1_Cardiometabolic_II	59	Inverse variance weighted	0.213979119060507	0.0566301299687853	1.23859679145877	1.10847374465425	1.38399490218911	0.000157751547729362
B3GNT7_Q8NFL0_OID30281_v1_Cardiometabolic_II	59	Simple mode	0.10602871187023	0.144522435706924	1.11185379945025	0.837582709861707	1.47593647385112	0.466118112337903
B3GNT7_Q8NFL0_OID30281_v1_Cardiometabolic_II	59	Weighted mode	0.275193960981361	0.0906774635557581	1.31678605521542	1.10237410617913	1.57290116439657	0.0035988776963803
B4GAT1_O43505_OID21127_v1_Neurology	28	MR Egger	-0.445401	0.218153910557112	0.640567235513916	0.41770373973177	0.982338303883593	0.0514513569666268
B4GAT1_O43505_OID21127_v1_Neurology	28	Weighted median	-0.145175	0.159043311860428	0.864871170179951	0.633243907849838	1.18122279857103	0.361347790312023
B4GAT1_O43505_OID21127_v1_Neurology	28	Inverse variance weighted	-0.282137	0.12450539714394	0.754170269855492	0.590865012576266	0.962610382791097	0.0234475062624718
B4GAT1_O43505_OID21127_v1_Neurology	28	Simple mode	-0.333278	0.260666289867196	0.716571014224555	0.42990808364909	1.19438093386941	0.211932923657064
B4GAT1_O43505_OID21127_v1_Neurology	28	Weighted mode	-0.21565	0.155372076164487	0.806017615225103	0.594414167514435	1.09294904387922	0.176498198690536
BCAT1_P54687_OID30312_v1_Cardiometabolic_II	46	MR Egger	0.368387035056946	0.201831304720897	1.44540135172455	0.973164328861012	2.14679577293213	0.0747602956301341
BCAT1_P54687_OID30312_v1_Cardiometabolic_II	46	Weighted median	0.482071489400403	0.128755596280249	1.61942555292557	1.25823572399761	2.0842987299201	0.000181054638606187
BCAT1_P54687_OID30312_v1_Cardiometabolic_II	46	Inverse variance weighted	0.353112518402167	0.0935058285119978	1.42349130338992	1.18511651484667	1.70981288796646	0.000159131149153261
BCAT1_P54687_OID30312_v1_Cardiometabolic_II	46	Simple mode	0.411371953023836	0.242879038031372	1.50888648708599	0.937375845365398	2.42884264851437	0.0972283072961287
BCAT1_P54687_OID30312_v1_Cardiometabolic_II	46	Weighted mode	0.440636273484239	0.146321096954017	1.55369547931199	1.16631233804914	2.06974543926399	0.00425458905127178
BLMH_Q13867_OID20336_v1_Cardiometabolic	52	MR Egger	0.235308384764375	0.129571727181887	1.26529890747882	0.981520675273317	1.63112338394837	0.075361135985138
BLMH_Q13867_OID20336_v1_Cardiometabolic	52	Weighted median	0.249880830853421	0.0850152021169552	1.28387240959169	1.08681460248868	1.51666011878779	0.00329008848177011
BLMH_Q13867_OID20336_v1_Cardiometabolic	52	Inverse variance weighted	0.246844380287999	0.0596224370463431	1.27997990717399	1.13881062192801	1.43864882467939	3.47115654331057e-05
BLMH_Q13867_OID20336_v1_Cardiometabolic	52	Simple mode	0.355192387231747	0.150248228552539	1.42645505962472	1.0625863182992	1.91492587669102	0.0219233455446441
BLMH_Q13867_OID20336_v1_Cardiometabolic	52	Weighted mode	0.259028537152815	0.0860357182173768	1.2956707790555	1.0946104312802	1.53366231466923	0.0040464003531901
BPIFB2_Q8N4F0_OID30311_v1_Cardiometabolic_II	46	MR Egger	0.0875679842536423	0.191901058595933	1.09152	0.749343274086951	1.58993646943181	0.650405568663329
BPIFB2_Q8N4F0_OID30311_v1_Cardiometabolic_II	46	Weighted median	-0.07753	0.121247821399849	0.92539921927475	0.729660606088979	1.17364663500812	0.522540278501446
BPIFB2_Q8N4F0_OID30311_v1_Cardiometabolic_II	46	Inverse variance weighted	-0.243309	0.0888362703790554	0.784029358646951	0.658738983884714	0.93314962414298	0.00616553552890464
BPIFB2_Q8N4F0_OID30311_v1_Cardiometabolic_II	46	Simple mode	0.0829601647616625	0.232741176205965	1.08649852675841	0.688518879074381	1.71451950632811	0.723170877946171
BPIFB2_Q8N4F0_OID30311_v1_Cardiometabolic_II	46	Weighted mode	-0.0684492	0.126550917347522	0.933840911890923	0.728703039532411	1.19672733803999	0.591256071966799
BTC_P35070_OID21199_v1_Oncology	39	MR Egger	0.0651331776346581	0.12078198711732	1.0673	0.842316438946716	1.35237982306336	0.592936311611586
BTC_P35070_OID21199_v1_Oncology	39	Weighted median	0.11205071826964	0.098529925592879	1.11856959112053	0.922131043521257	1.35685479734173	0.255444138214964
BTC_P35070_OID21199_v1_Oncology	39	Inverse variance weighted	0.243282845318376	0.0725518491342934	1.27542932231789	1.10636649832439	1.47032647743038	0.000798750646394203
BTC_P35070_OID21199_v1_Oncology	39	Simple mode	0.100790329603324	0.217532559801888	1.1060447126163	0.722113111950637	1.69410426990017	0.645767557564254
BTC_P35070_OID21199_v1_Oncology	39	Weighted mode	0.114886514131923	0.087668258307958	1.12174612801506	0.944647655675523	1.33204625889528	0.197903093752621
BTD_P43251_OID30754_v1_Inflammation_II	67	MR Egger	0.144060819744711	0.0872421893857094	1.15495435041759	0.973425610618914	1.37033537745159	0.103506239417965
BTD_P43251_OID30754_v1_Inflammation_II	67	Weighted median	0.24709449862206	0.0856594879634598	1.28030009365659	1.08242284357784	1.51435119790984	0.00391894707471112
BTD_P43251_OID30754_v1_Inflammation_II	67	Inverse variance weighted	0.225262972437827	0.0572939630200998	1.25265208585516	1.11959476729211	1.4015224919213	8.43454572350679e-05
BTD_P43251_OID30754_v1_Inflammation_II	67	Simple mode	0.406219153755985	0.185782165830739	1.50113149501756	1.04298428493398	2.16052705480246	0.0323269274158459
BTD_P43251_OID30754_v1_Inflammation_II	67	Weighted mode	0.150665176655384	0.0757966304267689	1.16260732483355	1.00210599551887	1.34881519300437	0.0509900581273161
BTN3A2_P78410_OID20540_v1_Inflammation	58	MR Egger	-0.113429	0.0818604821078015	0.892767497461205	0.76042663746517	1.0481403007922	0.171351081706689
BTN3A2_P78410_OID20540_v1_Inflammation	58	Weighted median	-0.174502	0.0699921200374116	0.839875536920521	0.732211315921307	0.96337068572885	0.0126611704557638
BTN3A2_P78410_OID20540_v1_Inflammation	58	Inverse variance weighted	-0.147353	0.042502001972521	0.862989008214517	0.794011568008052	0.937958662450525	0.00052635331103728
BTN3A2_P78410_OID20540_v1_Inflammation	58	Simple mode	-0.22618	0.10700028011759	0.797574276121928	0.646681833832689	0.983674958304144	0.0389177652697382
BTN3A2_P78410_OID20540_v1_Inflammation	58	Weighted mode	-0.234123	0.0772132761571043	0.791264283867256	0.68013683393947	0.920548830295644	0.00365002873712538
C1QTNF9_P0C862_OID30620_v1_Inflammation_II	92	MR Egger	0.055217375088767	0.0533752617690374	1.05677	0.951802105685251	1.17331477981133	0.30366841626853
C1QTNF9_P0C862_OID30620_v1_Inflammation_II	92	Weighted median	0.105576791938258	0.0603462450897931	1.11135144407759	0.987378479574693	1.25089016805932	0.0802016634637144
C1QTNF9_P0C862_OID30620_v1_Inflammation_II	92	Inverse variance weighted	0.0923737800060484	0.0372588339036791	1.09677469792757	1.0195348211303	1.17986626163539	0.0131660812051932
C1QTNF9_P0C862_OID30620_v1_Inflammation_II	92	Simple mode	0.360374293847485	0.113505283489445	1.43386600135593	1.14786527898236	1.79112631725142	0.00204556704149213
C1QTNF9_P0C862_OID30620_v1_Inflammation_II	92	Weighted mode	0.0716830732471232	0.0535967212369576	1.07431481100003	0.967184021315051	1.19331201477539	0.184408244335466
C4BPB_P20851_OID21481_v1_Oncology	18	MR Egger	-0.144268	0.265743	0.86565550893339	0.514208988939368	1.45730525188288	0.594691319984036
C4BPB_P20851_OID21481_v1_Oncology	18	Weighted median	-0.419345	0.207448235216302	0.657477551930167	0.437821844928538	0.987334771664129	0.0432339899953662
C4BPB_P20851_OID21481_v1_Oncology	18	Inverse variance weighted	-0.342068	0.14541998518183	0.710299822008154	0.534143214238141	0.944551617798665	0.0186588647666803
C4BPB_P20851_OID21481_v1_Oncology	18	Simple mode	-0.552954	0.305379615844506	0.575248023834175	0.316162792330598	1.04664526298561	0.0878952408115646
C4BPB_P20851_OID21481_v1_Oncology	18	Weighted mode	-0.483394	0.242621544810505	0.616686777319818	0.383301932039015	0.992174965824053	0.0626391011761898
CA4_P22748_OID20241_v1_Cardiometabolic	16	MR Egger	-0.253444	0.119461581492042	0.776123396192445	0.614105552836267	0.980885978534537	0.0522064498265317
CA4_P22748_OID20241_v1_Cardiometabolic	16	Weighted median	-0.223104	0.108024833794552	0.80003169290781	0.647373021648726	0.98868919193892	0.0388944076069444
CA4_P22748_OID20241_v1_Cardiometabolic	16	Inverse variance weighted	-0.177027	0.0888301488058284	0.837757016958249	0.703889237638625	0.997084174517675	0.0462753909356803
CA4_P22748_OID20241_v1_Cardiometabolic	16	Simple mode	-0.2295	0.214363127554701	0.794930664581821	0.522227421554853	1.21003749594586	0.301267778564142
CA4_P22748_OID20241_v1_Cardiometabolic	16	Weighted mode	-0.237465	0.109078328841028	0.788624696733251	0.636826350743986	0.976606749345455	0.0458611582880523
CCL17_Q92583_OID20745_v1_Inflammation	14	MR Egger	0.560072059877752	0.294577817552198	1.75079865808786	0.982848331174968	3.11878836635737	0.0815448351371158
CCL17_Q92583_OID20745_v1_Inflammation	14	Weighted median	0.398355148122225	0.201172609648979	1.48937288397399	1.00406507329719	2.20925082099777	0.0476848865590061
CCL17_Q92583_OID20745_v1_Inflammation	14	Inverse variance weighted	0.429307275212831	0.149040343272161	1.53619299591237	1.14704400464133	2.05736563823298	0.00397073970174607
CCL17_Q92583_OID20745_v1_Inflammation	14	Simple mode	0.623794289720771	0.289390352911266	1.86599475150101	1.05822100180306	3.29036789734523	0.0504426742506313
CCL17_Q92583_OID20745_v1_Inflammation	14	Weighted mode	0.412989817268191	0.20677772484363	1.51132963639128	1.00773524015771	2.26658469289723	0.0671685031540658
CCL24_O00175_OID20772_v1_Inflammation	85	MR Egger	0.114657059736142	0.0528142747844265	1.12148876796236	1.01120337412542	1.24380227444706	0.0327909410244006
CCL24_O00175_OID20772_v1_Inflammation	85	Weighted median	0.0664573250934631	0.0504577151693818	1.06871535577409	0.968080729791076	1.17981122495211	0.187808637794219
CCL24_O00175_OID20772_v1_Inflammation	85	Inverse variance weighted	0.0912643065621883	0.0313491231009151	1.09555853030392	1.0302690948795	1.16499	0.00360016293942279
CCL24_O00175_OID20772_v1_Inflammation	85	Simple mode	0.00754724321115008	0.0820882707257208	1.00757579543619	0.857833059809937	1.18345751768276	0.926964161189663
CCL24_O00175_OID20772_v1_Inflammation	85	Weighted mode	0.0816589788786262	0.0426019230394065	1.08508570958167	0.998160902936704	1.17958035991419	0.0586645946772587
CCL8_P80075_OID21466_v1_Oncology	48	MR Egger	0.0809373090100545	0.0842937913924042	1.08430291841262	0.919175209812281	1.27909543939749	0.34198410883342
CCL8_P80075_OID21466_v1_Oncology	48	Weighted median	0.101884808360004	0.0785999211631622	1.10725591775644	0.949166510252665	1.29167606965009	0.194890855916019
CCL8_P80075_OID21466_v1_Oncology	48	Inverse variance weighted	0.131116969433263	0.0578322590240119	1.14010113049605	1.01792449124351	1.27694205114416	0.0233783573892571
CCL8_P80075_OID21466_v1_Oncology	48	Simple mode	0.140067707828683	0.130503730864981	1.15035168403523	0.890724943403062	1.48565391231429	0.2886230334133
CCL8_P80075_OID21466_v1_Oncology	48	Weighted mode	0.105971426080642	0.0715629159522633	1.11179010785177	0.966289414039607	1.27919981938909	0.145329066268137
CD164L2_Q6UWJ8_OID30922_v1_Neurology_II	25	MR Egger	0.0550602110983925	0.108259035108386	1.05660423206162	0.854595092950599	1.30636427990238	0.615878883715766
CD164L2_Q6UWJ8_OID30922_v1_Neurology_II	25	Weighted median	0.0769671311738013	0.0981318400652276	1.08000657726071	0.891035263053923	1.30905504562036	0.432850176745899
CD164L2_Q6UWJ8_OID30922_v1_Neurology_II	25	Inverse variance weighted	0.194697379936621	0.0833865607187788	1.21494326464478	1.03175343705104	1.43065880209199	0.0195498364170815
CD164L2_Q6UWJ8_OID30922_v1_Neurology_II	25	Simple mode	0.00889660888806953	0.306692298337389	1.00894	0.553097879489623	1.84045626985746	0.977097881701872
CD164L2_Q6UWJ8_OID30922_v1_Neurology_II	25	Weighted mode	0.0776613590657067	0.101073457624626	1.08075660826619	0.88652795674074	1.31753864887153	0.449765088401584
CD226_Q15762_OID30556_v1_Inflammation_II	26	MR Egger	0.142922969365427	0.395810577719645	1.15364093255013	0.531067704041453	2.50605975683892	0.721191859213454
CD226_Q15762_OID30556_v1_Inflammation_II	26	Weighted median	0.762288630238467	0.221769648360069	2.14317554834969	1.38766172645447	3.31002963004524	0.000587546230421874
CD226_Q15762_OID30556_v1_Inflammation_II	26	Inverse variance weighted	0.614592612080456	0.186656499303373	1.84890322527257	1.2824160956735	2.66562712988097	0.000992515528475896
CD226_Q15762_OID30556_v1_Inflammation_II	26	Simple mode	0.810293829123991	0.34999015726465	2.2485685845577	1.13237038431071	4.46502376741115	0.0290985426543416
CD226_Q15762_OID30556_v1_Inflammation_II	26	Weighted mode	0.775197746923868	0.328873601280069	2.17102139754161	1.13951813951594	4.1362517586475	0.0265546552302434
CD276_Q5ZPR3_OID20680_v1_Inflammation	63	MR Egger	0.183782820140273	0.0848562276608699	1.2017547978142	1.01761801200631	1.41921091905799	0.0342439894739181
CD276_Q5ZPR3_OID20680_v1_Inflammation	63	Weighted median	0.0959429923525371	0.0845634737601297	1.10069631409795	0.932578996583589	1.29912037511796	0.256556461137354
CD276_Q5ZPR3_OID20680_v1_Inflammation	63	Inverse variance weighted	0.15457556944813	0.0581410092427799	1.16716247654913	1.04145543476584	1.30804276514298	0.00784585220906236
CD276_Q5ZPR3_OID20680_v1_Inflammation	63	Simple mode	-0.0137542	0.181151190503346	0.986339955740525	0.691556424128077	1.40677820977055	0.939721935270502
CD276_Q5ZPR3_OID20680_v1_Inflammation	63	Weighted mode	0.0864186589810712	0.0765128328315235	1.09026268103352	0.938430487491709	1.26666037548668	0.263052227005462
CD28_P10747_OID21265_v1_Oncology	15	MR Egger	-0.198098	0.334654664279659	0.820289091112352	0.425699494882507	1.58063188020376	0.564038383206698
CD28_P10747_OID21265_v1_Oncology	15	Weighted median	-0.634965	0.244747904283975	0.529954121048441	0.328023268475853	0.856193439328834	0.00947664485106787
CD28_P10747_OID21265_v1_Oncology	15	Inverse variance weighted	-0.668272	0.181694340371278	0.512593392292206	0.359014226611017	0.731870679058958	0.000235067060144758
CD28_P10747_OID21265_v1_Oncology	15	Simple mode	-1.18381	0.392501573138676	0.306109335068173	0.14183143272007	0.660664023614696	0.00925197938559671
CD28_P10747_OID21265_v1_Oncology	15	Weighted mode	-0.620577	0.238179428248854	0.537634321443154	0.33708898629147	0.85749067857028	0.0207539169536904
CD2AP_Q9Y5K6_OID20177_v1_Cardiometabolic	27	MR Egger	-0.217045	0.219696381645129	0.804893540775548	0.523273940197271	1.23807734766605	0.33265141831698
CD2AP_Q9Y5K6_OID20177_v1_Cardiometabolic	27	Weighted median	-0.269195	0.164058522946038	0.763994181641514	0.5539118001187	1.05375460399473	0.100828963604324
CD2AP_Q9Y5K6_OID20177_v1_Cardiometabolic	27	Inverse variance weighted	-0.294517	0.113068370276043	0.74489099836872	0.596824971905624	0.929690655669294	0.00919352798681843
CD2AP_Q9Y5K6_OID20177_v1_Cardiometabolic	27	Simple mode	-0.496716	0.260872916807306	0.608525533568543	0.364938175154791	1.0147015308766	0.0680257325876169
CD2AP_Q9Y5K6_OID20177_v1_Cardiometabolic	27	Weighted mode	-0.287213	0.149665231796963	0.750352072761191	0.559586810169276	1.00614993574759	0.0660199391533089
CD302_Q8IX05_OID21328_v1_Oncology	28	MR Egger	-0.385513	0.224423534584313	0.680101812287413	0.438067226224387	1.05586185723856	0.0977242375400109
CD302_Q8IX05_OID21328_v1_Oncology	28	Weighted median	-0.321003	0.168794462753367	0.725420803109546	0.521085824004797	1.00988228299846	0.0572050043267291
CD302_Q8IX05_OID21328_v1_Oncology	28	Inverse variance weighted	-0.364734	0.126725913077697	0.694381131635523	0.541659839036621	0.890162277544876	0.00400033883963368
CD302_Q8IX05_OID21328_v1_Oncology	28	Simple mode	-0.481772	0.315415940848155	0.617687923209629	0.332875353876728	1.14618990572765	0.138288320518657
CD302_Q8IX05_OID21328_v1_Oncology	28	Weighted mode	-0.388112	0.167072824072733	0.678336467872612	0.488911110561192	0.941153419724341	0.0279557028424611
CD36_P16671_OID30485_v1_Inflammation_II	20	MR Egger	-0.201759	0.295616889854771	0.817291660384758	0.457870739673864	1.45885203018271	0.503610781728413
CD36_P16671_OID30485_v1_Inflammation_II	20	Weighted median	-0.304496	0.160538606253583	0.737494904073759	0.538400932440727	1.01021135136062	0.0578654658710728
CD36_P16671_OID30485_v1_Inflammation_II	20	Inverse variance weighted	-0.330266	0.148779274343621	0.718732325890123	0.536937458994907	0.96207881872575	0.0264295881957463
CD36_P16671_OID30485_v1_Inflammation_II	20	Simple mode	-0.51155	0.304798358324332	0.599565505418967	0.329903587583721	1.08964803299411	0.109656522599855
CD36_P16671_OID30485_v1_Inflammation_II	20	Weighted mode	-0.342323	0.157692911965593	0.710118970105645	0.521314972107711	0.967301878296548	0.0428218283590981
CD46_P15529_OID20380_v1_Cardiometabolic	5	MR Egger	0.622559542623507	0.921062605410564	1.86369214176097	0.306443106505991	11.3343988672615	0.547535851841175
CD46_P15529_OID20380_v1_Cardiometabolic	5	Weighted median	1.02382837015939	0.403378859126421	2.78383192855471	1.26264131208956	6.13770524711845	0.0111446272713119
CD46_P15529_OID20380_v1_Cardiometabolic	5	Inverse variance weighted	0.990856929503835	0.333635376895851	2.69354165897732	1.40064324356045	5.17988195923722	0.00297916399787348
CD46_P15529_OID20380_v1_Cardiometabolic	5	Simple mode	1.26344876070727	0.545589253864794	3.53760081218432	1.21421019861626	10.3067982138752	0.0815158913063775
CD46_P15529_OID20380_v1_Cardiometabolic	5	Weighted mode	1.02888983161293	0.479891172567487	2.79795790544091	1.09231919025565	7.16692383550186	0.0986429460574859
CD80_P33681_OID30291_v1_Cardiometabolic_II	36	MR Egger	-0.31881	0.134829517038065	0.72701347319897	0.558178696962111	0.946916450035545	0.0239027889865662
CD80_P33681_OID30291_v1_Cardiometabolic_II	36	Weighted median	-0.231467	0.121636363478451	0.793369036942915	0.625080979858526	1.00696461588415	0.0570482718687692
CD80_P33681_OID30291_v1_Cardiometabolic_II	36	Inverse variance weighted	-0.26618	0.0833732568334536	0.766301058870566	0.650774724091341	0.902335771639052	0.00140982306910187
CD80_P33681_OID30291_v1_Cardiometabolic_II	36	Simple mode	-0.32424	0.193508965238791	0.723076789976995	0.494841671007982	1.05658	0.102733212383034
CD80_P33681_OID30291_v1_Cardiometabolic_II	36	Weighted mode	-0.240082	0.106313881526303	0.786563633724571	0.638612860653839	0.968790934251727	0.0302696367522244
CDCP1_Q9H5V8_OID20940_v1_Neurology	39	MR Egger	-0.149123	0.192463197699108	0.861463254241582	0.590756863532959	1.25621720917525	0.443374126622765
CDCP1_Q9H5V8_OID20940_v1_Neurology	39	Weighted median	-0.133233	0.179437915759844	0.875261314709752	0.615739615626737	1.24416612084912	0.45778398136516
CDCP1_Q9H5V8_OID20940_v1_Neurology	39	Inverse variance weighted	-0.214477	0.109123013583403	0.806963631623342	0.651578248496127	0.999404606071045	0.0493612756857564
CDCP1_Q9H5V8_OID20940_v1_Neurology	39	Simple mode	-0.153203	0.323178353746314	0.857955431803479	0.455375603455298	1.61644040079401	0.638175951289989
CDCP1_Q9H5V8_OID20940_v1_Neurology	39	Weighted mode	-0.101821	0.165302858018981	0.90319155575286	0.653237691199794	1.24878738225436	0.541590554204974
CEACAM19_Q7Z692_OID31443_v1_Oncology_II	20	MR Egger	-0.592895	0.307574991818872	0.552724556857889	0.302479287667282	1.01000117432766	0.0698300151141049
CEACAM19_Q7Z692_OID31443_v1_Oncology_II	20	Weighted median	-0.476744	0.208284789188579	0.620801409205487	0.412721508537069	0.933787994324758	0.0220848881144053
CEACAM19_Q7Z692_OID31443_v1_Oncology_II	20	Inverse variance weighted	-0.377761	0.155562223964539	0.685394523176306	0.505269858462102	0.929732190694907	0.0151673930774843
CEACAM19_Q7Z692_OID31443_v1_Oncology_II	20	Simple mode	-0.519778	0.361110092707227	0.594652550579878	0.293008466548581	1.20683084716436	0.166312815080458
CEACAM19_Q7Z692_OID31443_v1_Oncology_II	20	Weighted mode	-0.422729	0.270226855083406	0.655256375079355	0.38582424248658	1.11284069221511	0.134239183492505
CES2_O00748_OID21366_v1_Oncology	4	MR Egger	-0.261729	0.662357238123074	0.769719552754458	0.210146739155107	2.81930708168272	0.730895490555804
CES2_O00748_OID21366_v1_Oncology	4	Weighted median	-0.712617	0.349479926263581	0.490359177971913	0.247190052325481	0.972741909147224	0.0414421546829894
CES2_O00748_OID21366_v1_Oncology	4	Inverse variance weighted	-0.677524	0.319360739754068	0.507872812032989	0.271587398219221	0.949730344241139	0.0338796364969016
CES2_O00748_OID21366_v1_Oncology	4	Simple mode	-1.16578	0.540405466354122	0.311679365292416	0.108070119382309	0.89889811637412	0.119887738303619
CES2_O00748_OID21366_v1_Oncology	4	Weighted mode	-0.603838	0.371409000346852	0.546709351097599	0.264001733575393	1.13215587840904	0.20246373506882
CETN3_O15182_OID31525_v1_Oncology_II	10	MR Egger	-0.803354	0.549536738357917	0.447824463708834	0.152522072971866	1.3148703422953	0.18191522457052
CETN3_O15182_OID31525_v1_Oncology_II	10	Weighted median	-0.714573	0.317647678229794	0.489400861748881	0.262589627671663	0.912119818304591	0.0244757186026269
CETN3_O15182_OID31525_v1_Oncology_II	10	Inverse variance weighted	-0.718273	0.258011394968186	0.487593765935416	0.294058956099453	0.808503450235582	0.00537129637852972
CETN3_O15182_OID31525_v1_Oncology_II	10	Simple mode	-0.841592	0.463232531789068	0.431023716109135	0.173855996816602	1.06859382046227	0.102625804506792
CETN3_O15182_OID31525_v1_Oncology_II	10	Weighted mode	-0.707339	0.346228173799921	0.492954195148376	0.25008704534192	0.971677034218816	0.0714195346168833
CFH_P08603_OID30790_v1_Inflammation_II	37	MR Egger	0.011229994305551	0.19046888255659	1.01129328739673	0.696220390673426	1.46895168086711	0.953319538311057
CFH_P08603_OID30790_v1_Inflammation_II	37	Weighted median	-0.152724	0.133933110154297	0.858367007845681	0.660186823054596	1.1160385127787	0.254162589823293
CFH_P08603_OID30790_v1_Inflammation_II	37	Inverse variance weighted	-0.229611	0.0945329392900737	0.79484244585681	0.660409008344794	0.956641271927944	0.0151445723107101
CFH_P08603_OID30790_v1_Inflammation_II	37	Simple mode	-0.217772	0.233820749630999	0.804308518257287	0.508616480170721	1.27190568485727	0.357869268100762
CFH_P08603_OID30790_v1_Inflammation_II	37	Weighted mode	-0.126029	0.132744435473984	0.881589050535914	0.679628907403308	1.14356415031594	0.348741186828177
CHAD_O15335_OID30660_v1_Inflammation_II	9	MR Egger	-0.945992	0.586689947376924	0.388294076796022	0.122958965460351	1.22620005389922	0.150904910082665
CHAD_O15335_OID30660_v1_Inflammation_II	9	Weighted median	-0.520467	0.329752182952543	0.594242905342344	0.311367500672124	1.13410882570419	0.114483307731564
CHAD_O15335_OID30660_v1_Inflammation_II	9	Inverse variance weighted	-0.74424	0.269379482678043	0.475095354509525	0.280207876608854	0.805529090074832	0.00573090992216463
CHAD_O15335_OID30660_v1_Inflammation_II	9	Simple mode	-0.373726	0.472522276613177	0.688165776023072	0.272567448326015	1.73744934766753	0.451801075413619
CHAD_O15335_OID30660_v1_Inflammation_II	9	Weighted mode	-0.420806	0.465269865658196	0.656517646689636	0.263754998599123	1.63415071829593	0.392187088734354
CHCHD6_Q9BRQ6_OID31426_v1_Oncology_II	16	MR Egger	-0.323071	0.273122014938529	0.723922369815642	0.423843809415591	1.23645452847852	0.256555159427603
CHCHD6_Q9BRQ6_OID31426_v1_Oncology_II	16	Weighted median	-0.302355	0.19040235033836	0.739075436088317	0.508879570153698	1.0734022984341	0.112290671272745
CHCHD6_Q9BRQ6_OID31426_v1_Oncology_II	16	Inverse variance weighted	-0.387857	0.141814505652971	0.678509073277877	0.513855152188376	0.895922830703921	0.00623872863527421
CHCHD6_Q9BRQ6_OID31426_v1_Oncology_II	16	Simple mode	-0.283991	0.322887858006381	0.752773664274182	0.399776004806109	1.41746423700345	0.392984866257684
CHCHD6_Q9BRQ6_OID31426_v1_Oncology_II	16	Weighted mode	-0.315092	0.197497264898293	0.729721788558239	0.495500672377215	1.07465825655078	0.131466312135676
CHL1_O00533_OID20366_v1_Cardiometabolic	55	MR Egger	-0.0497782	0.126993256767114	0.951440437853743	0.741793055524157	1.2203388802874	0.696648388943474
CHL1_O00533_OID20366_v1_Cardiometabolic	55	Weighted median	-0.203879	0.108532904970693	0.815561193212705	0.659282394976998	1.00888491023295	0.060313099176568
CHL1_O00533_OID20366_v1_Cardiometabolic	55	Inverse variance weighted	-0.1476	0.0704707041971927	0.862776149287988	0.751471053776266	0.990567341269584	0.0362165764687668
CHL1_O00533_OID20366_v1_Cardiometabolic	55	Simple mode	-0.271479	0.187305063480168	0.762251328620976	0.528032800782544	1.10036173344414	0.15301041488644
CHL1_O00533_OID20366_v1_Cardiometabolic	55	Weighted mode	-0.189204	0.117682690990385	0.827617675146237	0.657137465303049	1.04232531605634	0.113722590449969
CLEC12A_Q5QGZ9_OID30552_v1_Inflammation_II	48	MR Egger	0.316068701507397	0.147908516140226	1.37172449192925	1.02651339837163	1.83302827293185	0.0379547687042089
CLEC12A_Q5QGZ9_OID30552_v1_Inflammation_II	48	Weighted median	0.228606712339222	0.112074900870828	1.25684763912758	1.00897998694675	1.56560685882457	0.0413735131807869
CLEC12A_Q5QGZ9_OID30552_v1_Inflammation_II	48	Inverse variance weighted	0.236180804440448	0.0796031572139232	1.26640326080156	1.08345890829073	1.48023815826939	0.00300742621811104
CLEC12A_Q5QGZ9_OID30552_v1_Inflammation_II	48	Simple mode	-0.154859	0.234948556673463	0.856536305882484	0.540447518571672	1.35749433216709	0.513037216952076
CLEC12A_Q5QGZ9_OID30552_v1_Inflammation_II	48	Weighted mode	0.156879814144308	0.103873896528414	1.16985500542665	0.954361237971504	1.43400703975641	0.137663574833295
CLEC14A_Q86T13_OID21090_v1_Neurology	4	MR Egger	-1.63617	1.91383611013684	0.194725365273861	0.004574381081212	8.28920179754508	0.482665731371797
CLEC14A_Q86T13_OID21090_v1_Neurology	4	Weighted median	-0.961995	0.483070800037998	0.382129899648278	0.148256196428768	0.98493866511247	0.0464352270525341
CLEC14A_Q86T13_OID21090_v1_Neurology	4	Inverse variance weighted	-0.906414	0.427599161436696	0.403970438110541	0.174730947130602	0.933962286287185	0.0340251105487927
CLEC14A_Q86T13_OID21090_v1_Neurology	4	Simple mode	-1.06273	0.648899796651417	0.345510962744608	0.0968516834129295	1.23258389704736	0.200000338477887
CLEC14A_Q86T13_OID21090_v1_Neurology	4	Weighted mode	-1.0725	0.58407275792184	0.342153034629551	0.108904951925092	1.07496213015855	0.163649428744342
CLEC1A_Q8NC01_OID20099_v1_Cardiometabolic	29	MR Egger	0.141581526888558	0.119884228624118	1.15209442710611	0.910836782105387	1.45725512522766	0.247907503017393
CLEC1A_Q8NC01_OID20099_v1_Cardiometabolic	29	Weighted median	0.26164743933586	0.112864949252874	1.29906846124396	1.04126064610817	1.62070743123375	0.0204365702992798
CLEC1A_Q8NC01_OID20099_v1_Cardiometabolic	29	Inverse variance weighted	0.302365520849707	0.0824225245657781	1.35305570640416	1.15121438561144	1.59028567355898	0.000243995180194914
CLEC1A_Q8NC01_OID20099_v1_Cardiometabolic	29	Simple mode	0.501137906483429	0.208949556128701	1.65059842913625	1.09592283110495	2.48601005193053	0.0233751848378428
CLEC1A_Q8NC01_OID20099_v1_Cardiometabolic	29	Weighted mode	0.259656143722868	0.0938847764739566	1.29648420577834	1.07857635509605	1.55841659970655	0.00994199956399
CLEC4C_Q8WTT0_OID20547_v1_Inflammation	91	MR Egger	-0.0866712	0.0692911066196199	0.916978506889759	0.800529564663406	1.05036668127469	0.214275609281588
CLEC4C_Q8WTT0_OID20547_v1_Inflammation	91	Weighted median	-0.0477219	0.0592713964300864	0.953398933244637	0.848832169765848	1.07084716895538	0.420738087663493
CLEC4C_Q8WTT0_OID20547_v1_Inflammation	91	Inverse variance weighted	-0.100119	0.0394857476154832	0.904729563175567	0.83735156192345	0.977529176160636	0.0112261825800138
CLEC4C_Q8WTT0_OID20547_v1_Inflammation	91	Simple mode	0.0184256716195361	0.0948360036752924	1.01859647172969	0.845816458040767	1.22667129772281	0.846386822938106
CLEC4C_Q8WTT0_OID20547_v1_Inflammation	91	Weighted mode	-0.0836226	0.0566384238532218	0.919778308280552	0.823135938165287	1.02776722186264	0.143319240181994
CLEC6A_Q6EIG7_OID21228_v1_Oncology	46	MR Egger	-0.0893547	0.108546010860738	0.914521119256431	0.739260513184641	1.13133173306275	0.414835661209829
CLEC6A_Q6EIG7_OID21228_v1_Oncology	46	Weighted median	-0.101424	0.0909708404833486	0.903549428343365	0.755989864102732	1.07991073455541	0.264888222848582
CLEC6A_Q6EIG7_OID21228_v1_Oncology	46	Inverse variance weighted	-0.132488	0.0668650536505598	0.875913315550017	0.768324082095368	0.998568383103984	0.0475435338205469
CLEC6A_Q6EIG7_OID21228_v1_Oncology	46	Simple mode	-0.184481	0.16399472167201	0.83153543451759	0.602956019806114	1.14676884572891	0.266586369365571
CLEC6A_Q6EIG7_OID21228_v1_Oncology	46	Weighted mode	-0.116954	0.0875235493891404	0.889626083465594	0.749386661058471	1.05611	0.188183020263333
CLSTN2_Q9H4D0_OID20664_v1_Inflammation	89	MR Egger	-0.403986	0.111284098458005	0.667653251723503	0.536814244651723	0.830381959827035	0.000477512188744913
CLSTN2_Q9H4D0_OID20664_v1_Inflammation	89	Weighted median	-0.157757	0.0866192107633841	0.85405751564659	0.720701387367889	1.01208940737072	0.0685662296625718
CLSTN2_Q9H4D0_OID20664_v1_Inflammation	89	Inverse variance weighted	-0.189009	0.0549416632310285	0.827778681547672	0.743270591304282	0.921895139726155	0.000581317957669898
CLSTN2_Q9H4D0_OID20664_v1_Inflammation	89	Simple mode	-0.0235948	0.160014791059765	0.976681351730098	0.713749070472368	1.33647314200497	0.883110959348724
CLSTN2_Q9H4D0_OID20664_v1_Inflammation	89	Weighted mode	-0.249456	0.10415296782732	0.779224776367773	0.635339646368207	0.955695517470528	0.0187368138869564
CNTN1_Q12860_OID20307_v1_Cardiometabolic	52	MR Egger	0.0922123669392091	0.167099738238208	1.09659767844696	0.790331248102568	1.52154741605155	0.583515972555046
CNTN1_Q12860_OID20307_v1_Cardiometabolic	52	Weighted median	0.149465759414995	0.130553836284872	1.16121370949455	0.899047185079879	1.49982926535528	0.252267491066817
CNTN1_Q12860_OID20307_v1_Cardiometabolic	52	Inverse variance weighted	0.185986182171005	0.0845021909190337	1.20440561799178	1.02057060543071	1.42135476461031	0.027738654574202
CNTN1_Q12860_OID20307_v1_Cardiometabolic	52	Simple mode	0.057830710832377	0.218895264228162	1.05953561262498	0.689903182085026	1.62720761923119	0.792695508332438
CNTN1_Q12860_OID20307_v1_Cardiometabolic	52	Weighted mode	0.162318749520453	0.154271130633216	1.17623510594983	0.869312450531024	1.5915210044716	0.297683505528342
CPA2_P48052_OID21060_v1_Neurology	48	MR Egger	-0.235824	0.120785238442672	0.78991935264902	0.623402132227851	1.0009150617749	0.0569888018056035
CPA2_P48052_OID21060_v1_Neurology	48	Weighted median	-0.263536	0.099222593559968	0.768329589230803	0.6325393994959	0.933270493755861	0.00790705972150178
CPA2_P48052_OID21060_v1_Neurology	48	Inverse variance weighted	-0.321255	0.069828292307081	0.725238134804456	0.632472416769584	0.831609945712878	4.21183771187187e-06
CPA2_P48052_OID21060_v1_Neurology	48	Simple mode	-0.530625	0.175319159111069	0.588237364237444	0.417174665103211	0.829444416523731	0.00400439958778145
CPA2_P48052_OID21060_v1_Neurology	48	Weighted mode	-0.281444	0.0919757586106752	0.754693545602036	0.63020129240567	0.903778450848901	0.00365110129033786
CPA4_Q9UI42_OID30606_v1_Inflammation_II	56	MR Egger	0.115682136667948	0.094786635452129	1.12263896964957	0.932300893946785	1.35183636995181	0.22759798263978
CPA4_Q9UI42_OID30606_v1_Inflammation_II	56	Weighted median	0.192020703878994	0.0911148205186264	1.21169560350436	1.01352631967247	1.44861184860621	0.0350778544821485
CPA4_Q9UI42_OID30606_v1_Inflammation_II	56	Inverse variance weighted	0.253024288746138	0.0614684808352792	1.28791455828449	1.14173161023891	1.45281421182167	3.84960170041923e-05
CPA4_Q9UI42_OID30606_v1_Inflammation_II	56	Simple mode	0.493397248489052	0.1928261238632	1.63787103396655	1.12238742460103	2.3901029761272	0.0132865891296265
CPA4_Q9UI42_OID30606_v1_Inflammation_II	56	Weighted mode	0.231482066912929	0.087200583106963	1.26046672231545	1.06244082274281	1.49540221352098	0.0103640469468481
CPE_P16870_OID21392_v1_Oncology	21	MR Egger	0.494769527027351	0.239456679092672	1.64012019211774	1.02576065110024	2.62243852082551	0.052715562884128
CPE_P16870_OID21392_v1_Oncology	21	Weighted median	0.321975320109997	0.18902345436264	1.37985	0.952647193139291	1.99862869053907	0.0885003930788498
CPE_P16870_OID21392_v1_Oncology	21	Inverse variance weighted	0.267021795750199	0.128022007479911	1.3060689127722	1.01622894271501	1.67857451525893	0.0370013499921038
CPE_P16870_OID21392_v1_Oncology	21	Simple mode	0.330276863244661	0.319115405759651	1.39135328972909	0.744390637122071	2.60060226485961	0.31303298304267
CPE_P16870_OID21392_v1_Oncology	21	Weighted mode	0.311926620267013	0.181722480789762	1.36605444864088	0.956715282655558	1.95053302741417	0.101519888725923
CPXM2_Q8N436_OID30322_v1_Cardiometabolic_II	56	MR Egger	-0.132475	0.12587631671564	0.875925026188928	0.684413946811522	1.1210242793538	0.297293501153238
CPXM2_Q8N436_OID30322_v1_Cardiometabolic_II	56	Weighted median	-0.0743664	0.0969079506396449	0.928331496854358	0.767738593517686	1.12251666821019	0.442848437637893
CPXM2_Q8N436_OID30322_v1_Cardiometabolic_II	56	Inverse variance weighted	-0.143139	0.0683372535051073	0.866633190801872	0.757993485840602	0.990843722840875	0.0362062277783997
CPXM2_Q8N436_OID30322_v1_Cardiometabolic_II	56	Simple mode	0.0967790814603688	0.175873735380186	1.10161697912256	0.780411885854392	1.55502496910656	0.584358181900818
CPXM2_Q8N436_OID30322_v1_Cardiometabolic_II	56	Weighted mode	-0.171498	0.0897786925620472	0.842402253260546	0.706477530888325	1.0044785931212	0.06132355857372
CST1_P01037_OID30581_v1_Inflammation_II	60	MR Egger	0.253832975683416	0.0964099	1.28895649920933	1.06701975816982	1.55705538171445	0.0108342749978256
CST1_P01037_OID30581_v1_Inflammation_II	60	Weighted median	0.14639774017455	0.0806797227190563	1.15765654300938	0.988334064565482	1.3559875346011	0.0695924263670093
CST1_P01037_OID30581_v1_Inflammation_II	60	Inverse variance weighted	0.15787105708585	0.0568592855956073	1.17101519086122	1.04752145773803	1.30906776858662	0.00549439173368564
CST1_P01037_OID30581_v1_Inflammation_II	60	Simple mode	0.185951178515905	0.145383621640551	1.20436346013077	0.905742055979993	1.60143976369604	0.20589145709948
CST1_P01037_OID30581_v1_Inflammation_II	60	Weighted mode	0.185951178515905	0.0724348901829478	1.20436346013077	1.04496	1.38808286772517	0.012809430858936
CST7_O76096_OID20704_v1_Inflammation	89	MR Egger	-0.0873149	0.073077097847081	0.916388477629747	0.794099894625034	1.05750907110886	0.235399541045461
CST7_O76096_OID20704_v1_Inflammation	89	Weighted median	-0.145362	0.0679688502823397	0.864708885854037	0.756856715090033	0.987930003614996	0.0324630766552318
CST7_O76096_OID20704_v1_Inflammation	89	Inverse variance weighted	-0.124474	0.0435273420028408	0.882961426496102	0.810756631584627	0.961596674400626	0.0042408420712379
CST7_O76096_OID20704_v1_Inflammation	89	Simple mode	-0.106322	0.117632415346454	0.899135463185359	0.713993723094018	1.13228527787925	0.368544793272617
CST7_O76096_OID20704_v1_Inflammation	89	Weighted mode	-0.159267	0.0742358798762885	0.852768958466595	0.737293706175488	0.98632999364179	0.0346740889766759
CSTB_P04080_OID20294_v1_Cardiometabolic	60	MR Egger	-0.248687	0.0841599956822372	0.779824178818966	0.661238697875594	0.919676588536698	0.00451365906514854
CSTB_P04080_OID20294_v1_Cardiometabolic	60	Weighted median	-0.267442	0.07132248350255	0.765334625340533	0.665488321530783	0.880161333857517	0.000177004621758678
CSTB_P04080_OID20294_v1_Cardiometabolic	60	Inverse variance weighted	-0.19776	0.0499319816814527	0.820566983568507	0.744065345241555	0.904934195402053	7.47671466487658e-05
CSTB_P04080_OID20294_v1_Cardiometabolic	60	Simple mode	-0.317607	0.129410368371071	0.72788847926253	0.564817983772299	0.938039604731693	0.0170872453114444
CSTB_P04080_OID20294_v1_Cardiometabolic	60	Weighted mode	-0.260963	0.0638348444903867	0.770309788319428	0.679716949806463	0.872976862133091	0.000133385044592399
CTSD_P07339_OID20358_v1_Cardiometabolic	31	MR Egger	-0.499824	0.218188013934116	0.606637690751092	0.395552380816917	0.930368026302318	0.0294326250069519
CTSD_P07339_OID20358_v1_Cardiometabolic	31	Weighted median	-0.291198	0.1475164436348	0.747367673245988	0.55971349364227	0.997936346644724	0.0483813148302022
CTSD_P07339_OID20358_v1_Cardiometabolic	31	Inverse variance weighted	-0.237781	0.114433863466838	0.788375405056448	0.629977438207467	0.986600061529872	0.0377195564639014
CTSD_P07339_OID20358_v1_Cardiometabolic	31	Simple mode	-0.2451	0.285497470945738	0.782626256774657	0.44723322596492	1.36954014646746	0.397423171153316
CTSD_P07339_OID20358_v1_Cardiometabolic	31	Weighted mode	-0.331369	0.172597923360047	0.717940407695391	0.511882260267391	1.00694723964955	0.0644254616476588
CXCL10_P02778_OID20697_v1_Inflammation	5	MR Egger	-0.71774	0.942209092123557	0.487853722425365	0.0769599988357049	3.09253193977267	0.501613178607579
CXCL10_P02778_OID20697_v1_Inflammation	5	Weighted median	-0.890109	0.518599565059133	0.410610880767479	0.148590003139234	1.13467455308322	0.0860941534603474
CXCL10_P02778_OID20697_v1_Inflammation	5	Inverse variance weighted	-0.924451	0.418298657392132	0.396749145544792	0.174764409808982	0.900697600058114	0.0271033305858023
CXCL10_P02778_OID20697_v1_Inflammation	5	Simple mode	-1.60121	0.795078090451558	0.201651926442729	0.0424441891892655	0.958046324238603	0.114288816952383
CXCL10_P02778_OID20697_v1_Inflammation	5	Weighted mode	-0.736819	0.667398924676692	0.478634266935553	0.12939048902971	1.77053787494638	0.331531636332687
DBH_P09172_OID30703_v1_Inflammation_II	89	MR Egger	-0.101864	0.0453467086967891	0.903152511512548	0.82634460542196	0.987099635792874	0.0272148740023276
DBH_P09172_OID30703_v1_Inflammation_II	89	Weighted median	-0.11996	0.0498826111427624	0.886955611027576	0.804342375959506	0.97805397234586	0.0161789769172268
DBH_P09172_OID30703_v1_Inflammation_II	89	Inverse variance weighted	-0.106886	0.0308321262892644	0.898627965545889	0.84593129934806	0.95460733168697	0.000526862297401339
DBH_P09172_OID30703_v1_Inflammation_II	89	Simple mode	-0.0975423	0.0868254952982307	0.907063977884526	0.765121783101334	1.0753386952868	0.264310742519514
DBH_P09172_OID30703_v1_Inflammation_II	89	Weighted mode	-0.109108	0.0393410954993394	0.896633612340384	0.830093854832035	0.968507151448845	0.00677220196676397
DBI_P07108_OID21143_v1_Neurology	28	MR Egger	0.0463078655381863	0.207267540853651	1.04739681871056	0.697720619783021	1.57232001569075	0.824954211294483
DBI_P07108_OID21143_v1_Neurology	28	Weighted median	-0.435749	0.179459865067201	0.646780263846353	0.45498537618055	0.919424516921518	0.0151776522767843
DBI_P07108_OID21143_v1_Neurology	28	Inverse variance weighted	-0.454161	0.115395644601019	0.634980785108769	0.506446795808771	0.796136140645251	8.29608283395057e-05
DBI_P07108_OID21143_v1_Neurology	28	Simple mode	-0.249005	0.333430224959614	0.779576260016225	0.405543147982323	1.49858072613121	0.461640022100615
DBI_P07108_OID21143_v1_Neurology	28	Weighted mode	-0.467104	0.190619638090696	0.626814770535592	0.431400366940873	0.910747386117629	0.0210314735480926
DCC_P43146_OID30953_v1_Neurology_II	25	MR Egger	-0.247706	0.288115655697552	0.780589420113206	0.443786067320671	1.37300354306163	0.398802602482665
DCC_P43146_OID30953_v1_Neurology_II	25	Weighted median	-0.326612	0.193348285068106	0.721363281073771	0.493824518762405	1.05374472815895	0.0911726990781171
DCC_P43146_OID30953_v1_Neurology_II	25	Inverse variance weighted	-0.345534	0.132305638043567	0.707842072269518	0.546154529344818	0.917396766581551	0.00901099308783378
DCC_P43146_OID30953_v1_Neurology_II	25	Simple mode	-0.549528	0.325630040235188	0.577222132273214	0.304902572607989	1.09276017954237	0.104446651885153
DCC_P43146_OID30953_v1_Neurology_II	25	Weighted mode	-0.364215	0.195933811739642	0.694742013423969	0.473196294778627	1.0200131965154	0.0753516173013596
DLK1_P80370_OID20295_v1_Cardiometabolic	51	MR Egger	-0.0564892	0.109090020955727	0.945076734438728	0.763146244721378	1.17037860063567	0.606913007138514
DLK1_P80370_OID20295_v1_Cardiometabolic	51	Weighted median	-0.137161	0.0953096906996975	0.871830128396279	0.723273622033793	1.05089934102969	0.150120690900865
DLK1_P80370_OID20295_v1_Cardiometabolic	51	Inverse variance weighted	-0.140103	0.061698346533726	0.869268318828172	0.770256122183041	0.981007989883646	0.0231602377322494
DLK1_P80370_OID20295_v1_Cardiometabolic	51	Simple mode	-0.222953	0.162760466996998	0.800152749440902	0.581605353483695	1.10082	0.176863389445825
DLK1_P80370_OID20295_v1_Cardiometabolic	51	Weighted mode	-0.110891	0.085373353972809	0.895036332168425	0.757128159462484	1.05806	0.199938461078289
DNM1_Q05193_OID31458_v1_Oncology_II	20	MR Egger	0.260294528582787	0.214202774725086	1.29731212590415	0.852533384507699	1.97413823622849	0.23999769071069
DNM1_Q05193_OID31458_v1_Oncology_II	20	Weighted median	0.336310116701675	0.163395607725677	1.39977305050966	1.0161842951384	1.92815870340357	0.0395654910898381
DNM1_Q05193_OID31458_v1_Oncology_II	20	Inverse variance weighted	0.388427777080363	0.120605835493682	1.4746604753336	1.16420719903603	1.86790076483957	0.00127905447492532
DNM1_Q05193_OID31458_v1_Oncology_II	20	Simple mode	0.144767739092219	0.300598163747822	1.15577109864694	0.641205896754451	2.08327284454013	0.635591279259005
DNM1_Q05193_OID31458_v1_Oncology_II	20	Weighted mode	0.355184579796332	0.154630872449751	1.42644392271245	1.05348958676518	1.9314308277988	0.0331568583902997
DPEP1_P16444_OID20897_v1_Neurology	115	MR Egger	-0.0388214	0.0499956301423666	0.961922516704926	0.872133464988941	1.06095565104324	0.439078877737004
DPEP1_P16444_OID20897_v1_Neurology	115	Weighted median	0.0273731681591281	0.0449593531886665	1.02775125525687	0.941061143749435	1.12242721920662	0.542628793467638
DPEP1_P16444_OID20897_v1_Neurology	115	Inverse variance weighted	0.0772494731394811	0.0299616745876954	1.08031155149217	1.01869723559191	1.14565251333906	0.00992945900493069
DPEP1_P16444_OID20897_v1_Neurology	115	Simple mode	0.0829837485696019	0.0768326994531387	1.08652415083314	0.934626455495924	1.26310861778172	0.28239619890511
DPEP1_P16444_OID20897_v1_Neurology	115	Weighted mode	0.0364703880210127	0.0431945633032505	1.03714359168878	0.952951797787733	1.12877359828509	0.400254401519346
DPP10_Q8N608_OID20527_v1_Inflammation	40	MR Egger	0.0188982899707541	0.189962283297616	1.01907799289362	0.702276705463755	1.47879026531899	0.921276636555344
DPP10_Q8N608_OID20527_v1_Inflammation	40	Weighted median	-0.236619	0.153979138420518	0.789291616679086	0.583670577553543	1.06735079703882	0.124367297856891
DPP10_Q8N608_OID20527_v1_Inflammation	40	Inverse variance weighted	-0.304344	0.10093973371945	0.737607067954901	0.605206290820714	0.898973118668719	0.0025688922727035
DPP10_Q8N608_OID20527_v1_Inflammation	40	Simple mode	-0.180922	0.262555611295508	0.834500732938114	0.498809681528888	1.39610656942295	0.494852742623662
DPP10_Q8N608_OID20527_v1_Inflammation	40	Weighted mode	-0.168267	0.142495203154889	0.845127968756828	0.639187258040029	1.11742102895661	0.244809099570339
DTYMK_P23919_OID30308_v1_Cardiometabolic_II	3	MR Egger	2.85842519070705	1.45007107513918	17.4340500028351	1.01641922129204	299.036158638349	0.298872807007663
DTYMK_P23919_OID30308_v1_Cardiometabolic_II	3	Weighted median	1.60127481471737	0.85863542862262	4.95935064945283	0.92159388396709	26.6876324725116	0.0621945074725421
DTYMK_P23919_OID30308_v1_Cardiometabolic_II	3	Inverse variance weighted	1.98959312564221	0.690011463167918	7.31255786465739	1.89112266966308	28.2760623526814	0.00393382060226225
DTYMK_P23919_OID30308_v1_Cardiometabolic_II	3	Simple mode	1.32163349337947	1.10539936985086	3.74954122830446	0.429579149551779	32.7275181708052	0.354380667068303
DTYMK_P23919_OID30308_v1_Cardiometabolic_II	3	Weighted mode	1.32163349337947	1.08844907150013	3.74954122830446	0.444090598468452	31.6580883973693	0.348574094306676
ECI2_O75521_OID30142_v1_Cardiometabolic_II	20	MR Egger	-0.111524	0.302373756743097	0.8944696139323	0.49451543764152	1.61789871326157	0.716557364447064
ECI2_O75521_OID30142_v1_Cardiometabolic_II	20	Weighted median	0.164353737598085	0.190594083117673	1.17863116751841	0.811224320816035	1.71243809313854	0.38850957998055
ECI2_O75521_OID30142_v1_Cardiometabolic_II	20	Inverse variance weighted	0.273577130051504	0.133010678154846	1.31465875499916	1.01295945609566	1.70621601061665	0.0397049130268804
ECI2_O75521_OID30142_v1_Cardiometabolic_II	20	Simple mode	0.346606632266549	0.345102416722983	1.41426029157065	0.719071771825633	2.78154733738944	0.327826209994459
ECI2_O75521_OID30142_v1_Cardiometabolic_II	20	Weighted mode	0.159488723835233	0.190357798071696	1.17291103620806	0.80766124437305	1.70333826024618	0.412538468583735
EGFLAM_Q63HQ2_OID31496_v1_Oncology_II	46	MR Egger	0.225889603429683	0.0980459518039625	1.25343728246274	1.03429448563628	1.51901130953151	0.0260093329855362
EGFLAM_Q63HQ2_OID31496_v1_Oncology_II	46	Weighted median	0.180060936501907	0.105054694717504	1.19729031958277	0.974484890387562	1.4710378000797	0.0865336388391012
EGFLAM_Q63HQ2_OID31496_v1_Oncology_II	46	Inverse variance weighted	0.132439682324751	0.0674494839875872	1.14161015474185	1.00023872219869	1.30296269928933	0.049583594686306
EGFLAM_Q63HQ2_OID31496_v1_Oncology_II	46	Simple mode	0.164428717239002	0.173681123969182	1.17871954417331	0.838629484440504	1.65672658735946	0.348833887118224
EGFLAM_Q63HQ2_OID31496_v1_Oncology_II	46	Weighted mode	0.148666812443704	0.0965086364866372	1.16028633183044	0.960318657147099	1.40189338383991	0.130453725477955
ENDOU_P21128_OID31498_v1_Oncology_II	33	MR Egger	-0.0477318	0.173976660812345	0.953389422330401	0.677919936246348	1.34079460126866	0.785629827999712
ENDOU_P21128_OID31498_v1_Oncology_II	33	Weighted median	-0.172958	0.133008211595035	0.841173200730525	0.648136608820385	1.09170249604482	0.193479837958664
ENDOU_P21128_OID31498_v1_Oncology_II	33	Inverse variance weighted	-0.201698	0.0939158265977598	0.817342122139117	0.679925165394448	0.982531870599786	0.0317422536383796
ENDOU_P21128_OID31498_v1_Oncology_II	33	Simple mode	-0.174511	0.202840563714611	0.839867523126222	0.564351149894459	1.24989105902254	0.396003909068781
ENDOU_P21128_OID31498_v1_Oncology_II	33	Weighted mode	-0.174511	0.133573832565323	0.839867523126222	0.646413542093089	1.09121701584122	0.200703037231275
ENO3_P13929_OID30209_v1_Cardiometabolic_II	3	MR Egger	0.969462965286057	1.78248268868747	2.63652817193782	0.0801221363195682	86.7585553847004	0.682877324080962
ENO3_P13929_OID30209_v1_Cardiometabolic_II	3	Weighted median	0.836651999858951	0.513860273815819	2.30862474754036	0.843231168937054	6.32062525828387	0.103488795454505
ENO3_P13929_OID30209_v1_Cardiometabolic_II	3	Inverse variance weighted	0.923479347320103	0.453175749227998	2.51803628891692	1.03588369998412	6.12086738347142	0.0415704228575987
ENO3_P13929_OID30209_v1_Cardiometabolic_II	3	Simple mode	0.837285000508999	0.628126182059579	2.31008657112509	0.674460399248469	7.91225099655784	0.314099592222264
ENO3_P13929_OID30209_v1_Cardiometabolic_II	3	Weighted mode	0.829864807602523	0.5713437120571	2.29300872196204	0.748286862860569	7.02656863290904	0.283518354365905
ENPP5_Q9UJA9_OID20736_v1_Inflammation	104	MR Egger	-0.0440981	0.0492046821579797	0.956860093509861	0.868889544685898	1.05373720302122	0.37224695505149
ENPP5_Q9UJA9_OID20736_v1_Inflammation	104	Weighted median	-0.129778	0.057014817278246	0.878290460148378	0.785427627034136	0.982132669945061	0.0228332101148104
ENPP5_Q9UJA9_OID20736_v1_Inflammation	104	Inverse variance weighted	-0.154263	0.0367255791577185	0.857046885229425	0.797522853364318	0.92101356140815	2.66426827841178e-05
ENPP5_Q9UJA9_OID20736_v1_Inflammation	104	Simple mode	-0.284732	0.11134605298298	0.75221551910152	0.604731533697981	0.935668401012736	0.012009551455813
ENPP5_Q9UJA9_OID20736_v1_Inflammation	104	Weighted mode	-0.097064	0.0445222249094613	0.907497943130475	0.831663356035709	0.990247449053991	0.0315253584151729
EPHA4_P54764_OID30622_v1_Inflammation_II	13	MR Egger	0.100159071081596	0.568080487000783	1.10534673279208	0.363026776331193	3.3655682703126	0.863253376788856
EPHA4_P54764_OID30622_v1_Inflammation_II	13	Weighted median	-0.775298	0.24864203983417	0.460566446908136	0.282907146671526	0.749791776253257	0.00182002661562525
EPHA4_P54764_OID30622_v1_Inflammation_II	13	Inverse variance weighted	-0.651632	0.197701174542423	0.521194438797384	0.353763592799192	0.767867718902081	0.000980560674035632
EPHA4_P54764_OID30622_v1_Inflammation_II	13	Simple mode	-0.708224	0.36108158604663	0.49251814262643	0.242696426601272	0.999496054446307	0.0734532468754977
EPHA4_P54764_OID30622_v1_Inflammation_II	13	Weighted mode	-0.832173	0.291219313302703	0.435102846610624	0.245867452085576	0.769985964074562	0.0144193507970953
ESYT2_A0FGR8_OID31134_v1_Neurology_II	9	MR Egger	-0.178679	0.387934309976445	0.836373990671636	0.391006671601473	1.78902689666885	0.65905851964126
ESYT2_A0FGR8_OID31134_v1_Neurology_II	9	Weighted median	-0.26314	0.303233857311211	0.768634189761033	0.424230440770603	1.39263584337897	0.385515066167641
ESYT2_A0FGR8_OID31134_v1_Neurology_II	9	Inverse variance weighted	-0.468983	0.218184851836307	0.625638401801184	0.407944143441065	0.959502461554247	0.0315968299095198
ESYT2_A0FGR8_OID31134_v1_Neurology_II	9	Simple mode	-0.341279	0.526514607026089	0.710860639685296	0.253283084619455	1.99509118349932	0.535022459517539
ESYT2_A0FGR8_OID31134_v1_Neurology_II	9	Weighted mode	-0.181467	0.325637220553002	0.834045951310735	0.440556872518709	1.57898489909106	0.592590409035857
F12_P00748_OID30739_v1_Inflammation_II	122	MR Egger	-0.0398682	0.0427432596960218	0.960916084942602	0.883693511076815	1.04488684224496	0.352828998595714
F12_P00748_OID30739_v1_Inflammation_II	122	Weighted median	-0.0398542	0.0485645155195245	0.960929509270254	0.873680374403818	1.05689168354786	0.411848539198946
F12_P00748_OID30739_v1_Inflammation_II	122	Inverse variance weighted	-0.0809777	0.0295752616149392	0.922214279464287	0.870275728734561	0.9772525524577	0.0061810206302866
F12_P00748_OID30739_v1_Inflammation_II	122	Simple mode	-0.0867895	0.0904659768586868	0.916870103492871	0.767894607420494	1.09474761061669	0.339290319653649
F12_P00748_OID30739_v1_Inflammation_II	122	Weighted mode	-0.0717149	0.041399035580847	0.930796267148524	0.858252470883698	1.00947182831359	0.0857712968238397
F2R_P25116_OID20691_v1_Inflammation	6	MR Egger	0.620036274036087	0.680156663013583	1.85899547389222	0.490136779266219	7.05081585006849	0.413544870485886
F2R_P25116_OID20691_v1_Inflammation	6	Weighted median	0.705430233458777	0.320175316974149	2.02471759881635	1.0810000794885	3.79230439732846	0.0275762603159854
F2R_P25116_OID20691_v1_Inflammation	6	Inverse variance weighted	0.750087099967578	0.264716711238035	2.11718441527593	1.26016459822191	3.55705108254271	0.00460346157006847
F2R_P25116_OID20691_v1_Inflammation	6	Simple mode	0.900541236677261	0.41813274735277	2.46093469889177	1.08437203718006	5.58498318340895	0.0838496807353673
F2R_P25116_OID20691_v1_Inflammation	6	Weighted mode	0.701888506402924	0.358007788897652	2.01755928559469	1.00019325883561	4.06975895401268	0.107213867501315
FAM20A_Q96MK3_OID30348_v1_Cardiometabolic_II	40	MR Egger	-0.25611	0.18317760697751	0.774056708132281	0.540566156098187	1.10840048095011	0.170175247596473
FAM20A_Q96MK3_OID30348_v1_Cardiometabolic_II	40	Weighted median	-0.411668	0.136673755569111	0.662544450894144	0.506845939415353	0.866072143967396	0.00259493341119302
FAM20A_Q96MK3_OID30348_v1_Cardiometabolic_II	40	Inverse variance weighted	-0.320003	0.0991433729872843	0.726146571545371	0.597904398579297	0.881894905974947	0.0012479711820659
FAM20A_Q96MK3_OID30348_v1_Cardiometabolic_II	40	Simple mode	-0.315805	0.270075199474577	0.729201764760591	0.429491981541591	1.23805620729259	0.24937124632059
FAM20A_Q96MK3_OID30348_v1_Cardiometabolic_II	40	Weighted mode	-0.262283	0.134567318457825	0.769293450783279	0.590943583250072	1.0014702421561	0.0585043177712304
FCRL1_Q96LA6_OID20172_v1_Cardiometabolic	49	MR Egger	0.153248394514829	0.178733	1.16561447522866	0.821134625561674	1.65460944231066	0.395566457462608
FCRL1_Q96LA6_OID20172_v1_Cardiometabolic	49	Weighted median	-0.0731861	0.15652943157908	0.929427830317767	0.683872484928067	1.26315374694458	0.64010285170752
FCRL1_Q96LA6_OID20172_v1_Cardiometabolic	49	Inverse variance weighted	-0.209011	0.095793830790349	0.811386228265634	0.672490691317912	0.978969106812372	0.0291180376016078
FCRL1_Q96LA6_OID20172_v1_Cardiometabolic	49	Simple mode	-0.400273	0.274774029924368	0.670137128396389	0.39108513076948	1.14830182873934	0.151700491848092
FCRL1_Q96LA6_OID20172_v1_Cardiometabolic	49	Weighted mode	-0.0302677	0.138261235432324	0.970185797847502	0.739885597209054	1.27217030024041	0.8276431999317
FOLR3_P41439_OID21485_v1_Oncology	66	MR Egger	-0.0396825	0.0406395005791447	0.961094511642661	0.887509592890795	1.04078048024356	0.332516973505355
FOLR3_P41439_OID21485_v1_Oncology	66	Weighted median	-0.0666079	0.0486651353191157	0.935561982761575	0.850448395564793	1.02919380899941	0.17109365855387
FOLR3_P41439_OID21485_v1_Oncology	66	Inverse variance weighted	-0.0837804	0.0337699452243488	0.919633152777252	0.860734204248626	0.98256248155643	0.013104483693973
FOLR3_P41439_OID21485_v1_Oncology	66	Simple mode	0.00908458384532063	0.106006653923496	1.0091259739194	0.819805257449323	1.2421672366522	0.931969730197182
FOLR3_P41439_OID21485_v1_Oncology	66	Weighted mode	-0.0644043	0.037433476709026	0.937625834786568	0.871295651372391	1.00900561672087	0.090099227769282
FSTL1_Q12841_OID30254_v1_Cardiometabolic_II	9	MR Egger	1.22533660608825	0.812798596560949	3.40531213869358	0.692291171934574	16.7503952556971	0.175400588883597
FSTL1_Q12841_OID30254_v1_Cardiometabolic_II	9	Weighted median	0.644519247128132	0.263609029963952	1.90507094075759	1.13637747382164	3.19374096453505	0.0144859502781153
FSTL1_Q12841_OID30254_v1_Cardiometabolic_II	9	Inverse variance weighted	0.653862303485523	0.208103925626565	1.92295353487946	1.27887221722281	2.89141	0.00167798671557808
FSTL1_Q12841_OID30254_v1_Cardiometabolic_II	9	Simple mode	0.763091047535234	0.380620719118946	2.14489595963127	1.01722103946999	4.52269319954256	0.0799122925448898
FSTL1_Q12841_OID30254_v1_Cardiometabolic_II	9	Weighted mode	0.496993980351154	0.281685967210171	1.6437726237563	0.946380552566761	2.85507603815651	0.115676973417663
FSTL3_O95633_OID20782_v1_Inflammation	9	MR Egger	1.08059484397391	0.457700403119411	2.94643169702663	1.2014174329522	7.22601446185992	0.0502730689490357
FSTL3_O95633_OID20782_v1_Inflammation	9	Weighted median	0.572690989842342	0.289237492013774	1.77303184824227	1.00580227385448	3.12550688798327	0.0477032351182657
FSTL3_O95633_OID20782_v1_Inflammation	9	Inverse variance weighted	0.54552679594853	0.236507739806065	1.72551713842856	1.08542501146589	2.74308161647172	0.0210775911986806
FSTL3_O95633_OID20782_v1_Inflammation	9	Simple mode	0.333987004736793	0.461335231273455	1.3965249952467	0.565395355350502	3.44941295306495	0.489718090625628
FSTL3_O95633_OID20782_v1_Inflammation	9	Weighted mode	0.558086287288415	0.344139439908759	1.74732541977523	0.89009505825373	3.4301348988305	0.143528164329195
FUT8_Q9BYC5_OID20992_v1_Neurology	85	MR Egger	0.114798871810521	0.0851478353345377	1.12164781988841	0.949242590586898	1.32536597529044	0.181252266743126
FUT8_Q9BYC5_OID20992_v1_Neurology	85	Weighted median	0.0768561137949978	0.0816688925917535	1.07988668441663	0.92015337057644	1.26734877952987	0.346669182368915
FUT8_Q9BYC5_OID20992_v1_Neurology	85	Inverse variance weighted	0.142978291022965	0.0568513783607378	1.1537047556441	1.03205255323065	1.2896965944508	0.0119049759004833
FUT8_Q9BYC5_OID20992_v1_Neurology	85	Simple mode	-0.00311772	0.15454968324341	0.996887132814903	0.736360771714893	1.34958839979691	0.983953251568699
FUT8_Q9BYC5_OID20992_v1_Neurology	85	Weighted mode	0.108866528773616	0.0712819889710226	1.11501351818756	0.969624719353248	1.28220240359617	0.130451829399758
GBP4_Q96PP9_OID20845_v1_Neurology	88	MR Egger	0.118114066765729	0.0692473189411798	1.12537247164446	0.982543483346553	1.28896402184826	0.0916762894968675
GBP4_Q96PP9_OID20845_v1_Neurology	88	Weighted median	0.0664249682051059	0.0675319198083852	1.06868077603009	0.93618928571745	1.21992274263323	0.325308059791115
GBP4_Q96PP9_OID20845_v1_Neurology	88	Inverse variance weighted	0.102921474260211	0.0423977698057258	1.10840436738561	1.02001960269607	1.20444767766445	0.0152024089754671
GBP4_Q96PP9_OID20845_v1_Neurology	88	Simple mode	0.10391356136972	0.116261411639326	1.10950454671725	0.883416232073196	1.3934545172408	0.373898874258895
GBP4_Q96PP9_OID20845_v1_Neurology	88	Weighted mode	0.0816256558710693	0.0611778365683133	1.08504955186481	0.962440624260714	1.22327809147331	0.185608508128599
GC_P02774_OID30780_v1_Inflammation_II	95	MR Egger	-0.0656908	0.0484607131971959	0.93642039239963	0.851569838513338	1.02972546894419	0.17852627127194
GC_P02774_OID30780_v1_Inflammation_II	95	Weighted median	-0.112846	0.0514876087538498	0.893288201233056	0.807540775175433	0.988140580627444	0.0284002996261359
GC_P02774_OID30780_v1_Inflammation_II	95	Inverse variance weighted	-0.0872498	0.0310385712792617	0.916448125942216	0.862357455100567	0.973931590172261	0.00493858591615253
GC_P02774_OID30780_v1_Inflammation_II	95	Simple mode	-0.124839	0.0840373369784542	0.882638939383136	0.748598681613043	1.04067976133317	0.140752507403569
GC_P02774_OID30780_v1_Inflammation_II	95	Weighted mode	-0.107068	0.039671913586344	0.898464545163733	0.831249752966264	0.971114320378072	0.00825028746754076
GDNF_P39905_OID20861_v1_Neurology	28	MR Egger	-0.176166	0.215708806785806	0.838479072400775	0.549385489226387	1.27969735029597	0.421530046575189
GDNF_P39905_OID20861_v1_Neurology	28	Weighted median	-0.259664	0.158615514590798	0.771310624433546	0.565214196954638	1.05255685821319	0.101616633173977
GDNF_P39905_OID20861_v1_Neurology	28	Inverse variance weighted	-0.23681	0.120489362102178	0.789140890832721	0.623149042701791	0.999348956526079	0.0493673711819574
GDNF_P39905_OID20861_v1_Neurology	28	Simple mode	-0.319416	0.228767908238727	0.726573417425783	0.464032426317488	1.13765526064463	0.174015788880951
GDNF_P39905_OID20861_v1_Neurology	28	Weighted mode	-0.245293	0.157112745395793	0.782475402587595	0.575087099404835	1.06465221753064	0.130110095109071
GFRA1_P56159_OID21457_v1_Oncology	14	MR Egger	-0.187555	0.282716994177677	0.828983471702516	0.476312860706489	1.44277774766915	0.519614483540476
GFRA1_P56159_OID21457_v1_Oncology	14	Weighted median	-0.315306	0.185453825777948	0.729565299800479	0.507227377062125	1.04936277248255	0.0890955354658018
GFRA1_P56159_OID21457_v1_Oncology	14	Inverse variance weighted	-0.294803	0.147421584704244	0.744678580595888	0.557803295843018	0.994160831481304	0.0455299959215339
GFRA1_P56159_OID21457_v1_Oncology	14	Simple mode	-0.168904	0.326041926480303	0.844589987157742	0.445772669039127	1.60021530244265	0.613130805092132
GFRA1_P56159_OID21457_v1_Oncology	14	Weighted mode	-0.298779	0.184234666622849	0.741723391618604	0.516913960265003	1.06430398860221	0.128851574857789
GGH_Q92820_OID20416_v1_Cardiometabolic	55	MR Egger	-0.0962445	0.107743185656903	0.90824188987999	0.735340823945137	1.12179727232759	0.375747004020083
GGH_Q92820_OID20416_v1_Cardiometabolic	55	Weighted median	-0.0938378	0.092913438896779	0.910430465529691	0.758852319855859	1.09228582541864	0.312520149925304
GGH_Q92820_OID20416_v1_Cardiometabolic	55	Inverse variance weighted	-0.13785	0.0638640147684229	0.871229699497012	0.768724149910997	0.987403855301718	0.0308900221600464
GGH_Q92820_OID20416_v1_Cardiometabolic	55	Simple mode	-0.26316	0.178114187005282	0.768618533242029	0.54212195442698	1.08974455806272	0.145355477346172
GGH_Q92820_OID20416_v1_Cardiometabolic	55	Weighted mode	-0.138543	0.0851700790559373	0.870626112142763	0.736772578324628	1.0287975549639	0.109631729903859
GGT1_P19440_OID21075_v1_Neurology	29	MR Egger	-0.38017	0.194750512779364	0.683745032868002	0.466787482321705	1.00154200289687	0.0613699250595417
GGT1_P19440_OID21075_v1_Neurology	29	Weighted median	-0.284083	0.157882047798888	0.752704478669154	0.552373185464602	1.0256906872336	0.0719658125951371
GGT1_P19440_OID21075_v1_Neurology	29	Inverse variance weighted	-0.386777	0.11352855776843	0.679242844851436	0.543735405253347	0.848520875823604	0.000657134203814272
GGT1_P19440_OID21075_v1_Neurology	29	Simple mode	-0.713017	0.274474900152955	0.490162904620123	0.286221787185732	0.839417835476406	0.014793477724091
GGT1_P19440_OID21075_v1_Neurology	29	Weighted mode	-0.349944	0.159294676459532	0.704727790827609	0.515735506668533	0.962976666805215	0.0364744354797094
GSTA1_P08263_OID20166_v1_Cardiometabolic	22	MR Egger	0.114892124407779	0.255734283135343	1.12175242133793	0.679534638295749	1.85175033598487	0.658072048790292
GSTA1_P08263_OID20166_v1_Cardiometabolic	22	Weighted median	0.25990316019278	0.17614745681291	1.29680449828728	0.918194667115847	1.83153090189527	0.140081847485408
GSTA1_P08263_OID20166_v1_Cardiometabolic	22	Inverse variance weighted	0.254566758245168	0.123760689331039	1.28990266010703	1.01206804541409	1.64400889850291	0.0396932057483906
GSTA1_P08263_OID20166_v1_Cardiometabolic	22	Simple mode	0.512220282849467	0.308667283149933	1.66899272012122	0.911405293452049	3.05630954727847	0.1118849049111
GSTA1_P08263_OID20166_v1_Cardiometabolic	22	Weighted mode	0.175787156218883	0.165867978433813	1.1921842826338	0.861298554460424	1.6501866355151	0.301272888075134
GSTA3_Q16772_OID21242_v1_Oncology	20	MR Egger	0.0810402382284493	0.39414647146953	1.08441453060849	0.500830856913474	2.34800803097881	0.839403447875453
GSTA3_Q16772_OID21242_v1_Oncology	20	Weighted median	0.282661229795958	0.173804475132554	1.32665565427488	0.943654154743583	1.86510621096959	0.103882167192839
GSTA3_Q16772_OID21242_v1_Oncology	20	Inverse variance weighted	0.302075671043621	0.142452734387853	1.35266358030162	1.02313179613055	1.78833144311833	0.0339611530519755
GSTA3_Q16772_OID21242_v1_Oncology	20	Simple mode	0.686864171471844	0.301859658205186	1.98747337548025	1.09989997229214	3.59128149627202	0.0346500365284893
GSTA3_Q16772_OID21242_v1_Oncology	20	Weighted mode	0.25432607824283	0.168051698994486	1.28959224368879	0.927692228259709	1.79267229402371	0.146640324952425
GSTP1_P09211_OID20876_v1_Neurology	13	MR Egger	-0.326102	0.288922911947683	0.721731765138526	0.409675198112782	1.27148712738664	0.283047084227233
GSTP1_P09211_OID20876_v1_Neurology	13	Weighted median	-0.42174	0.172452252892862	0.655904716211153	0.467785151747258	0.919676469296046	0.0144633385522045
GSTP1_P09211_OID20876_v1_Neurology	13	Inverse variance weighted	-0.406792	0.142762745180495	0.665782413218047	0.503280631347399	0.880753587841679	0.00437977197465191
GSTP1_P09211_OID20876_v1_Neurology	13	Simple mode	-0.386573	0.250493646878607	0.679381229566403	0.415804367620407	1.11003849653768	0.148721511318734
GSTP1_P09211_OID20876_v1_Neurology	13	Weighted mode	-0.418843	0.170969551157434	0.657807498383658	0.470507553270312	0.919667924398164	0.030603826091852
HBQ1_P09105_OID21433_v1_Oncology	42	MR Egger	0.179244459835469	0.110708606993423	1.1963131589426	0.962959032263258	1.48621605521008	0.113292228552703
HBQ1_P09105_OID21433_v1_Oncology	42	Weighted median	0.228163262580524	0.100220997162396	1.25629041390511	1.03223887483917	1.52897322755432	0.0228100391301755
HBQ1_P09105_OID21433_v1_Oncology	42	Inverse variance weighted	0.180376294486472	0.071504901981443	1.19766795418681	1.04104673879499	1.37785218956293	0.0116499955139556
HBQ1_P09105_OID21433_v1_Oncology	42	Simple mode	0.0985864989878267	0.183764385513754	1.10360986140183	0.769825281812128	1.5821183779732	0.594523861719193
HBQ1_P09105_OID21433_v1_Oncology	42	Weighted mode	0.198022982486138	0.100733570392369	1.21899040892989	1.00058535577096	1.48506832374948	0.056117743397529
HCLS1_P14317_OID20648_v1_Inflammation	4	MR Egger	1.3040043140112	1.14128891026479	3.68401914070695	0.393402526784601	34.4990082804584	0.371555647681397
HCLS1_P14317_OID20648_v1_Inflammation	4	Weighted median	0.78571737967802	0.447895677007971	2.19398029319651	0.911960914022571	5.27824104401861	0.0793890602588034
HCLS1_P14317_OID20648_v1_Inflammation	4	Inverse variance weighted	0.797968513089072	0.403676422621153	2.22102436045423	1.00678564361016	4.89970158100627	0.0480695753016067
HCLS1_P14317_OID20648_v1_Inflammation	4	Simple mode	0.513835092857064	0.66456553701262	1.67169000348224	0.454429106109831	6.14957851548143	0.495744128345731
HCLS1_P14317_OID20648_v1_Inflammation	4	Weighted mode	0.711445167832892	0.588932142837054	2.03693284241529	0.642195931803677	6.46079365974313	0.31358032228665
HRG_P04196_OID30770_v1_Inflammation_II	46	MR Egger	0.116892016127841	0.117224180859718	1.12399804947542	0.893269119078761	1.41432362122568	0.324136252976703
HRG_P04196_OID30770_v1_Inflammation_II	46	Weighted median	0.165409640101489	0.0923224646966719	1.17987634439579	0.984577768922336	1.41391389487546	0.0731888814208595
HRG_P04196_OID30770_v1_Inflammation_II	46	Inverse variance weighted	0.215134853671727	0.0662414575769886	1.24002910816957	1.08904546982468	1.41194489276501	0.00116326610858145
HRG_P04196_OID30770_v1_Inflammation_II	46	Simple mode	0.113848527292999	0.146228782540284	1.12058237438253	0.841339607602741	1.49250652938438	0.44031123686626
HRG_P04196_OID30770_v1_Inflammation_II	46	Weighted mode	0.160600180958102	0.0864307971118699	1.17421540127239	0.991234461932995	1.39097444805997	0.0696989729728366
HSBP1_O75506_OID30232_v1_Cardiometabolic_II	66	MR Egger	-0.121415	0.0838784654325069	0.88566593002764	0.751399924837338	1.04392363331888	0.152633296420986
HSBP1_O75506_OID30232_v1_Cardiometabolic_II	66	Weighted median	-0.185025	0.074892360231297	0.831083213074988	0.717620515842347	0.962485452696818	0.0134905294764493
HSBP1_O75506_OID30232_v1_Cardiometabolic_II	66	Inverse variance weighted	-0.151844	0.0485608893346223	0.85912200521155	0.781122197509575	0.94491056865615	0.0017666878390661
HSBP1_O75506_OID30232_v1_Cardiometabolic_II	66	Simple mode	-0.186901	0.117377941709943	0.829525747464732	0.659046031858253	1.04410455786633	0.1161687827908
HSBP1_O75506_OID30232_v1_Cardiometabolic_II	66	Weighted mode	-0.155155	0.0664562941298701	0.856282732743923	0.751706744425399	0.97540713028439	0.0226596968783912
ICAM5_Q9UMF0_OID20145_v1_Cardiometabolic	82	MR Egger	0.203317508630371	0.0649384860110299	1.22546150108637	1.079	1.39179870254151	0.00243339931528967
ICAM5_Q9UMF0_OID20145_v1_Cardiometabolic	82	Weighted median	0.121624132294855	0.0584543540516144	1.12932954349258	1.00707853357175	1.26642081554634	0.0374642605856265
ICAM5_Q9UMF0_OID20145_v1_Cardiometabolic	82	Inverse variance weighted	0.109757937338941	0.0416216126905737	1.1160078939198	1.02858037666618	1.21086659588833	0.0083632496374083
ICAM5_Q9UMF0_OID20145_v1_Cardiometabolic	82	Simple mode	-0.016001	0.0961172794763723	0.984126327298118	0.815143688361384	1.18813976224019	0.868198959467109
ICAM5_Q9UMF0_OID20145_v1_Cardiometabolic	82	Weighted mode	0.1372101562732	0.0504054866421255	1.14706918697708	1.03916281401607	1.2661805272142	0.00793947004874466
IFI30_P13284_OID31505_v1_Oncology_II	31	MR Egger	0.0453780846555232	0.14607115932958	1.04642342176502	0.78590340568896	1.39330351502737	0.758282987278233
IFI30_P13284_OID31505_v1_Oncology_II	31	Weighted median	0.130276974557306	0.130852377365787	1.13914385349853	0.881444107676951	1.47218491525621	0.319443243373267
IFI30_P13284_OID31505_v1_Oncology_II	31	Inverse variance weighted	0.174350746367631	0.0886335832726144	1.19047304669802	1.00062912096694	1.41633502885161	0.0491721713168111
IFI30_P13284_OID31505_v1_Oncology_II	31	Simple mode	-0.235996	0.230632418106113	0.78978369371995	0.502562275231679	1.24115619816147	0.314367365583744
IFI30_P13284_OID31505_v1_Oncology_II	31	Weighted mode	0.0812831714021105	0.120388697537892	1.08467800287376	0.856690408646082	1.37333902427785	0.504737006242822
IL10RB_Q08334_OID20696_v1_Inflammation	60	MR Egger	0.125308285918246	0.100832058483913	1.13349784063105	0.930230802670868	1.38118126278587	0.218963542968724
IL10RB_Q08334_OID20696_v1_Inflammation	60	Weighted median	0.126829192113939	0.0896079778914731	1.13522309616302	0.952369256849036	1.35318466949028	0.156957593182657
IL10RB_Q08334_OID20696_v1_Inflammation	60	Inverse variance weighted	0.125684261531661	0.05772703868047	1.13392408830133	1.01261821194111	1.26976171558802	0.0294644172366475
IL10RB_Q08334_OID20696_v1_Inflammation	60	Simple mode	-0.0677587	0.183388892608461	0.934485931333147	0.65233246167865	1.33867928879762	0.71309208711423
IL10RB_Q08334_OID20696_v1_Inflammation	60	Weighted mode	0.131098081558163	0.0856402636682032	1.14007959661166	0.963910495926362	1.34844624278217	0.131163499951492
IL12B_P29460_OID20666_v1_Inflammation	57	MR Egger	-0.138408	0.127599945950251	0.870743465223509	0.678070666501753	1.11816396090552	0.282785681128231
IL12B_P29460_OID20666_v1_Inflammation	57	Weighted median	-0.144934	0.0958646004816999	0.865079815433791	0.716893402435431	1.04389729983373	0.130570412742427
IL12B_P29460_OID20666_v1_Inflammation	57	Inverse variance weighted	-0.156988	0.0674966604317954	0.854714146357769	0.748801274219399	0.975607677411675	0.0200256923828347
IL12B_P29460_OID20666_v1_Inflammation	57	Simple mode	-0.282816	0.174119240877656	0.753658155231654	0.535748684041142	1.06019973892005	0.109934574061507
IL12B_P29460_OID20666_v1_Inflammation	57	Weighted mode	-0.198648	0.0866843739620649	0.819838713060455	0.691737298126775	0.971662966928004	0.0257103938373346
IL12RB1_P42701_OID20486_v1_Inflammation	38	MR Egger	0.0183358362273535	0.139290370969795	1.01850496982629	0.775169711614637	1.33822614327914	0.89600397449069
IL12RB1_P42701_OID20486_v1_Inflammation	38	Weighted median	0.16916636009718	0.101259594572298	1.18431714565193	0.971122708581825	1.44431500683721	0.0947966497927592
IL12RB1_P42701_OID20486_v1_Inflammation	38	Inverse variance weighted	0.140443440329479	0.0714081711632719	1.15078398976083	1.00048354171809	1.3236637444487	0.0492097463258373
IL12RB1_P42701_OID20486_v1_Inflammation	38	Simple mode	0.478589025533856	0.190504909814544	1.61379577039968	1.1109321106862	2.34428077423314	0.0164877785458653
IL12RB1_P42701_OID20486_v1_Inflammation	38	Weighted mode	0.16661054504752	0.0934900838151268	1.18129411486687	0.983507496189735	1.41885627839679	0.0829381256834936
IL17RB_Q9NRM6_OID20585_v1_Inflammation	81	MR Egger	-0.228472	0.063546869364259	0.795748433093171	0.702560299500379	0.90129711175047	0.000562202438163123
IL17RB_Q9NRM6_OID20585_v1_Inflammation	81	Weighted median	-0.130202	0.0584763363095308	0.877918364274246	0.782849126497681	0.984532815126351	0.0259760112636504
IL17RB_Q9NRM6_OID20585_v1_Inflammation	81	Inverse variance weighted	-0.0870838	0.0403365552881211	0.916600276413768	0.846924730981804	0.992007950633156	0.030855586410741
IL17RB_Q9NRM6_OID20585_v1_Inflammation	81	Simple mode	-0.098089	0.104553733344802	0.90656818335188	0.738588495393697	1.11275	0.350981578176191
IL17RB_Q9NRM6_OID20585_v1_Inflammation	81	Weighted mode	-0.113579	0.0547695880635808	0.892633560389679	0.80177478951131	0.993788634361538	0.0413185762177923
IL1RL1_Q01638_OID20250_v1_Cardiometabolic	79	MR Egger	0.121631218576135	0.0897033412974509	1.12933754626774	0.947254640320626	1.34642	0.179085549963542
IL1RL1_Q01638_OID20250_v1_Cardiometabolic	79	Weighted median	0.126939580156304	0.0720627769616469	1.13534841813515	0.985798345851007	1.30758591347527	0.0781514698224096
IL1RL1_Q01638_OID20250_v1_Cardiometabolic	79	Inverse variance weighted	0.109861470278877	0.0483748489080048	1.11612344347954	1.01516053892891	1.22712762495573	0.0231442395128655
IL1RL1_Q01638_OID20250_v1_Cardiometabolic	79	Simple mode	0.0786760187550071	0.127007538740023	1.08185376495675	0.843446540512895	1.38764878689213	0.537419019275078
IL1RL1_Q01638_OID20250_v1_Cardiometabolic	79	Weighted mode	0.147340383310803	0.0675541848856998	1.1587483144984	1.01504625302153	1.32279455478606	0.0321912113233294
IL1RN_P18510_OID20700_v1_Inflammation	27	MR Egger	0.46271634230586	0.25371628579695	1.58838272152786	0.966023055713532	2.61169715890965	0.080167030964061
IL1RN_P18510_OID20700_v1_Inflammation	27	Weighted median	0.370583934258295	0.189991547159755	1.4485802433735	0.998202119951266	2.10216416049536	0.0511131556505089
IL1RN_P18510_OID20700_v1_Inflammation	27	Inverse variance weighted	0.326607520806847	0.125568777861292	1.38625729325289	1.08382095227705	1.77308740808103	0.00929457011381397
IL1RN_P18510_OID20700_v1_Inflammation	27	Simple mode	0.810973522289234	0.393559987140304	2.25009744077391	1.04039031694018	4.86638371247781	0.0494766636032396
IL1RN_P18510_OID20700_v1_Inflammation	27	Weighted mode	0.435941008898269	0.185321303536866	1.54641756718257	1.07541996882834	2.22369619442373	0.0265034634988808
IL22_Q9GZX6_OID31407_v1_Oncology_II	6	MR Egger	0.524519809690758	0.969490298220119	1.68964730128605	0.252667426483775	11.2990742117942	0.617211519843601
IL22_Q9GZX6_OID31407_v1_Oncology_II	6	Weighted median	0.898074112631383	0.460134139130765	2.45487075105235	0.996218368381923	6.04926650184186	0.0509660070076921
IL22_Q9GZX6_OID31407_v1_Oncology_II	6	Inverse variance weighted	0.880380099808406	0.364294484619035	2.41181626311418	1.1810016212069	4.92535961218888	0.015663145536483
IL22_Q9GZX6_OID31407_v1_Oncology_II	6	Simple mode	1.46100603589941	0.709938359317275	4.31029365799158	1.07200084579648	17.3307992162253	0.0946818419857591
IL22_Q9GZX6_OID31407_v1_Oncology_II	6	Weighted mode	0.557124813008564	0.494168022010219	1.74564621870926	0.662692292682445	4.59833433184982	0.31075034361458
IL31RA_Q8NI17_OID30475_v1_Inflammation_II	73	MR Egger	-0.136349	0.0768259836952402	0.872538331844569	0.75056605241635	1.01433196730271	0.0802217932218051
IL31RA_Q8NI17_OID30475_v1_Inflammation_II	73	Weighted median	-0.0960042	0.0686059381356535	0.90846015666554	0.794158760851478	1.03921268256729	0.161705742736477
IL31RA_Q8NI17_OID30475_v1_Inflammation_II	73	Inverse variance weighted	-0.114334	0.0473924008690165	0.891959699445027	0.812838014762637	0.978783092060956	0.0158433904186103
IL31RA_Q8NI17_OID30475_v1_Inflammation_II	73	Simple mode	-0.0395107	0.120729785678363	0.961259643772738	0.758705865554615	1.21788975767392	0.744416495667796
IL31RA_Q8NI17_OID30475_v1_Inflammation_II	73	Weighted mode	-0.143073	0.0633115641757322	0.866690728795866	0.765547705968358	0.981196617173007	0.0268584331584919
INHBC_P55103_OID21093_v1_Neurology	73	MR Egger	0.172103466754735	0.0930253004499632	1.18780072474246	0.989825986884052	1.42537231836083	0.0684644508468588
INHBC_P55103_OID21093_v1_Neurology	73	Weighted median	0.148172474329776	0.077917011505742	1.15971289981988	0.995465444063523	1.35106046928014	0.0572142580907644
INHBC_P55103_OID21093_v1_Neurology	73	Inverse variance weighted	0.11928961002446	0.0534193632404707	1.12669617354906	1.01469457722455	1.25106046290534	0.0255437946999375
INHBC_P55103_OID21093_v1_Neurology	73	Simple mode	0.135381209125216	0.133230832539755	1.14497317539049	0.881834199870245	1.48663271684937	0.312965106826882
INHBC_P55103_OID21093_v1_Neurology	73	Weighted mode	0.135381209125216	0.0719769792176805	1.14497317539049	0.994322508079355	1.31844905622831	0.0640299817552211
INSL4_Q14641_OID31370_v1_Oncology_II	6	MR Egger	-0.37026	0.347084421574173	0.690554551418056	0.349746814727796	1.36345941808028	0.346181633495297
INSL4_Q14641_OID31370_v1_Oncology_II	6	Weighted median	-0.488887	0.29418499228387	0.613308916564686	0.34455928523561	1.09167810375662	0.09654612754238
INSL4_Q14641_OID31370_v1_Oncology_II	6	Inverse variance weighted	-0.571839	0.257108200660162	0.564486328312531	0.341034652001271	0.934347325064712	0.0261404701029194
INSL4_Q14641_OID31370_v1_Oncology_II	6	Simple mode	-0.755584	0.562526314212026	0.46973638216429	0.155963198517388	1.41477137444187	0.236950061596625
INSL4_Q14641_OID31370_v1_Oncology_II	6	Weighted mode	-0.433472	0.331855336399114	0.648254291242823	0.338270741360813	1.24229965744066	0.248339964004206
IQGAP2_Q13576_OID21361_v1_Oncology	5	MR Egger	-0.997287	1.22147933333586	0.368879006457535	0.0336619864156907	4.04229624849683	0.474040369898142
IQGAP2_Q13576_OID21361_v1_Oncology	5	Weighted median	-0.722193	0.30729803372674	0.485685870644423	0.265936594045858	0.887018824129762	0.0187663806997193
IQGAP2_Q13576_OID21361_v1_Oncology	5	Inverse variance weighted	-0.668687	0.269300365622874	0.512381139769163	0.302245634210735	0.868612819095675	0.0130262470204658
IQGAP2_Q13576_OID21361_v1_Oncology	5	Simple mode	-0.0975719	0.536008081721874	0.907037111802315	0.31722380244999	2.59348862170072	0.864408567741534
IQGAP2_Q13576_OID21361_v1_Oncology	5	Weighted mode	-0.834203	0.358779191130337	0.43422025369395	0.214936941066523	0.877221141151736	0.0806827276762933
ITGAM_P11215_OID21071_v1_Neurology	9	MR Egger	0.426355138509665	0.571651096078201	1.53166463164993	0.499533303319587	4.69637665448384	0.480060145965503
ITGAM_P11215_OID21071_v1_Neurology	9	Weighted median	0.652592747061251	0.269202695603415	1.92051378589287	1.13309798792685	3.25512289413992	0.0153434762548536
ITGAM_P11215_OID21071_v1_Neurology	9	Inverse variance weighted	0.736182761800501	0.223578762101303	2.08795008023362	1.34711920218462	3.23619137079904	0.00099222446264206
ITGAM_P11215_OID21071_v1_Neurology	9	Simple mode	0.544949163298452	0.422212597628474	1.72452071120329	0.753830657741595	3.94514557457617	0.232857431947675
ITGAM_P11215_OID21071_v1_Neurology	9	Weighted mode	0.627818147247724	0.287245352569848	1.87351837537084	1.06696402551838	3.28977455556372	0.0603286342406116
ITGAV_P06756_OID21416_v1_Oncology	13	MR Egger	-0.463878	0.527057011962574	0.628840073207274	0.223820686659138	1.7667707287198	0.397610300689966
ITGAV_P06756_OID21416_v1_Oncology	13	Weighted median	-0.436218	0.264162892352589	0.646476891447714	0.385205972399333	1.08495818113287	0.0986729738842006
ITGAV_P06756_OID21416_v1_Oncology	13	Inverse variance weighted	-0.473336	0.201614183682343	0.622920878091494	0.419580628658271	0.9248053743642	0.0188881818895929
ITGAV_P06756_OID21416_v1_Oncology	13	Simple mode	-0.539282	0.375906273107147	0.583166688356297	0.279135343135612	1.21834584824763	0.17694025502036
ITGAV_P06756_OID21416_v1_Oncology	13	Weighted mode	-0.369441	0.262402518835703	0.691120731145735	0.413230517517441	1.15588719799538	0.184531040955857
KLB_Q86Z14_OID20888_v1_Neurology	91	MR Egger	-0.211389	0.0638697713798659	0.809458992876658	0.714213089564391	0.917406682574978	0.00134969698141885
KLB_Q86Z14_OID20888_v1_Neurology	91	Weighted median	-0.148583	0.061867202534964	0.8619288437494	0.763499906680982	0.973047049758969	0.0163218982761463
KLB_Q86Z14_OID20888_v1_Neurology	91	Inverse variance weighted	-0.141344	0.0404050071293637	0.868190229542559	0.802086963383248	0.939741336143632	0.000468425644115585
KLB_Q86Z14_OID20888_v1_Neurology	91	Simple mode	-0.223773	0.097636795771614	0.799496472805032	0.660246995620829	0.968114378811605	0.0242445077415875
KLB_Q86Z14_OID20888_v1_Neurology	91	Weighted mode	-0.183973	0.05193813054406	0.831958207488828	0.751434068624447	0.921111362804007	0.000631220676844455
KLK14_Q9P0G3_OID21407_v1_Oncology	34	MR Egger	-0.336949	0.135369165989688	0.713945480893237	0.547566018848045	0.930879806530375	0.0181971465646878
KLK14_Q9P0G3_OID21407_v1_Oncology	34	Weighted median	-0.190861	0.122047209559628	0.826247275426871	0.650461143513384	1.04953934137079	0.117857309110182
KLK14_Q9P0G3_OID21407_v1_Oncology	34	Inverse variance weighted	-0.207541	0.0847699182818918	0.812579785427952	0.688190071848416	0.959452823712885	0.0143536879106686
KLK14_Q9P0G3_OID21407_v1_Oncology	34	Simple mode	-0.230932	0.198864621491079	0.793793183577894	0.537564253962002	1.17215312151181	0.253869827980599
KLK14_Q9P0G3_OID21407_v1_Oncology	34	Weighted mode	-0.211496	0.124991787982372	0.809372495859996	0.63351	1.03405490721145	0.100054057411239
KLK15_Q9H2R5_OID31427_v1_Oncology_II	51	MR Egger	0.0601737239705615	0.0613033198653221	1.06202102903036	0.941782631679705	1.19761039136078	0.33113179323157
KLK15_Q9H2R5_OID31427_v1_Oncology_II	51	Weighted median	0.142790660827746	0.0595188552120034	1.15348830610245	1.02647818416628	1.29621388241755	0.0164361983622802
KLK15_Q9H2R5_OID31427_v1_Oncology_II	51	Inverse variance weighted	0.0881895481994771	0.0397569231293287	1.09219512602858	1.01031885481325	1.18070665279336	0.0265399279808925
KLK15_Q9H2R5_OID31427_v1_Oncology_II	51	Simple mode	0.126088174089027	0.0892252733420408	1.13438218698938	0.9523779071554	1.35116841380995	0.163808694285108
KLK15_Q9H2R5_OID31427_v1_Oncology_II	51	Weighted mode	0.126088174089027	0.0617490751325368	1.13438218698938	1.00507281018215	1.28032808481366	0.046449834596666
KLK6_Q92876_OID21526_v1_Oncology	6	MR Egger	0.261078813927366	0.535632788417362	1.29832998788678	0.454407252374814	3.7095815452692	0.651467097699448
KLK6_Q92876_OID21526_v1_Oncology	6	Weighted median	0.390936467512236	0.236265095228838	1.47836458624948	0.930397728562728	2.34906189340427	0.0979951474721487
KLK6_Q92876_OID21526_v1_Oncology	6	Inverse variance weighted	0.403782135896422	0.198280983385749	1.49747766478778	1.01527	2.20871933984884	0.0417088183070157
KLK6_Q92876_OID21526_v1_Oncology	6	Simple mode	0.329375492745453	0.325018479055314	1.39009972996552	0.735164697821136	2.62849571664327	0.357367079564377
KLK6_Q92876_OID21526_v1_Oncology	6	Weighted mode	0.380426584282473	0.248202934757709	1.4629085101245	0.899378627634462	2.37953320574623	0.18591802287425
KYNU_Q16719_OID20669_v1_Inflammation	19	MR Egger	0.176453599837901	0.237130294979085	1.19297907105307	0.749520374024138	1.89881304537403	0.466965183442026
KYNU_Q16719_OID20669_v1_Inflammation	19	Weighted median	0.14583640981638	0.164949663320776	1.15700689759736	0.83739036585614	1.5986151927115	0.376627794240041
KYNU_Q16719_OID20669_v1_Inflammation	19	Inverse variance weighted	0.323898571438549	0.131067230864422	1.38250707430405	1.06930274827969	1.78745057335326	0.0134645456267769
KYNU_Q16719_OID20669_v1_Inflammation	19	Simple mode	0.256008303644299	0.309483990061144	1.29176345423941	0.704279265963391	2.36930561831317	0.418949801695228
KYNU_Q16719_OID20669_v1_Inflammation	19	Weighted mode	0.239778910951396	0.150179827572267	1.2709681221235	0.946888861588427	1.70596575055738	0.127758826788401
LAYN_Q6UX15_OID20970_v1_Neurology	35	MR Egger	-0.0995414	0.195144135346387	0.905252458907461	0.617532290620407	1.32702698596491	0.613382200566955
LAYN_Q6UX15_OID20970_v1_Neurology	35	Weighted median	-0.167997	0.140007507728776	0.845356492085481	0.642485152379581	1.11228655800728	0.230173053327244
LAYN_Q6UX15_OID20970_v1_Neurology	35	Inverse variance weighted	-0.217413	0.10437457374814	0.804597634731882	0.655742482876602	0.987243271133254	0.0372505930045665
LAYN_Q6UX15_OID20970_v1_Neurology	35	Simple mode	-0.302743	0.253657639252478	0.73878881871654	0.449368444752087	1.21461336467828	0.240930944035102
LAYN_Q6UX15_OID20970_v1_Neurology	35	Weighted mode	-0.158359	0.144848516571086	0.853543496046014	0.642581341576832	1.13376541225846	0.281960282626148
LBP_P18428_OID20355_v1_Cardiometabolic	53	MR Egger	-0.0722297	0.0833688637342179	0.930317134799475	0.790070798863355	1.09545875198356	0.390335488770141
LBP_P18428_OID20355_v1_Cardiometabolic	53	Weighted median	-0.132333	0.0813669353265872	0.876049456973534	0.746908997564076	1.02751828344093	0.10387099672159
LBP_P18428_OID20355_v1_Cardiometabolic	53	Inverse variance weighted	-0.123182	0.0573276692140716	0.884102832453959	0.790140794539806	0.98923865690083	0.0316555128683943
LBP_P18428_OID20355_v1_Cardiometabolic	53	Simple mode	-0.283599	0.125034692718688	0.753068906011524	0.589390371774892	0.962202309979358	0.0275003521263365
LBP_P18428_OID20355_v1_Cardiometabolic	53	Weighted mode	-0.126348	0.0750226326587658	0.881307848973589	0.760794008689338	1.02091	0.0981497254602951
LCN15_Q6UWW0_OID31032_v1_Neurology_II	52	MR Egger	-0.264437	0.0973522455366108	0.767637906748843	0.634290940033713	0.929018402574731	0.00904244510364491
LCN15_Q6UWW0_OID31032_v1_Neurology_II	52	Weighted median	-0.293049	0.0863579915587431	0.745985479571866	0.629826555139298	0.883567596810819	0.000690251109908957
LCN15_Q6UWW0_OID31032_v1_Neurology_II	52	Inverse variance weighted	-0.233698	0.0572618026428213	0.791600688098312	0.707561074234548	0.885621993939706	4.47993126923536e-05
LCN15_Q6UWW0_OID31032_v1_Neurology_II	52	Simple mode	-0.307057	0.161921522454096	0.735608843045362	0.535570390907083	1.01036274438184	0.0635877994596667
LCN15_Q6UWW0_OID31032_v1_Neurology_II	52	Weighted mode	-0.253556	0.0719233023410691	0.776036514031694	0.673999858284747	0.893520471418314	0.000903438141353599
LEFTY2_O00292_OID21454_v1_Oncology	84	MR Egger	0.0161030033143415	0.0678353547715348	1.01623335541908	0.889714822252817	1.16074297835274	0.812951272886682
LEFTY2_O00292_OID21454_v1_Oncology	84	Weighted median	0.0999426694241876	0.0649099812805774	1.10510755980674	0.973087868699147	1.2550384790786	0.123630599282299
LEFTY2_O00292_OID21454_v1_Oncology	84	Inverse variance weighted	0.111489739314477	0.040996681026198	1.11794227309258	1.03162604769043	1.21148058326505	0.00653842380933231
LEFTY2_O00292_OID21454_v1_Oncology	84	Simple mode	0.16390353205845	0.116974737268486	1.17810066066513	0.936723666754421	1.48167620389962	0.164886078956799
LEFTY2_O00292_OID21454_v1_Oncology	84	Weighted mode	0.0627535289502106	0.0603981707678055	1.06476437329464	0.945891995835939	1.19857571015346	0.301823362251599
LGALS3_P17931_OID20284_v1_Cardiometabolic	72	MR Egger	-0.180685	0.11062479614818	0.83469857339721	0.67199175377816	1.03680097934854	0.106894098341134
LGALS3_P17931_OID20284_v1_Cardiometabolic	72	Weighted median	-0.111549	0.0963473980172487	0.894447541293278	0.74052941440248	1.08035736132254	0.24695411047752
LGALS3_P17931_OID20284_v1_Cardiometabolic	72	Inverse variance weighted	-0.130381	0.0594557303732816	0.877760901163492	0.781207658826491	0.986247626871344	0.028313889696818
LGALS3_P17931_OID20284_v1_Cardiometabolic	72	Simple mode	-0.0652624	0.158185449126707	0.936821606208479	0.687079080552737	1.27734164334184	0.68116562874323
LGALS3_P17931_OID20284_v1_Cardiometabolic	72	Weighted mode	-0.0652624	0.0925811910336372	0.936821606208479	0.781358242173081	1.12321682230956	0.483165662684541
LPA_P08519_OID30747_v1_Inflammation_II	114	MR Egger	-0.0743289	0.0550190495941661	0.928366308183899	0.833462780182049	1.03407617312287	0.179429083447362
LPA_P08519_OID30747_v1_Inflammation_II	114	Weighted median	-0.12014	0.0553125416568656	0.886795925847489	0.795684143036764	0.988340688930091	0.0298535425042514
LPA_P08519_OID30747_v1_Inflammation_II	114	Inverse variance weighted	-0.0904439	0.0356166246700913	0.913525561479151	0.851928644715359	0.979576114328948	0.0111051118707862
LPA_P08519_OID30747_v1_Inflammation_II	114	Simple mode	-0.056915	0.0939138688598066	0.94467436106299	0.785852482624436	1.13559436176809	0.545707595126997
LPA_P08519_OID30747_v1_Inflammation_II	114	Weighted mode	-0.0982013	0.0507393929541802	0.906466427639279	0.820656626770572	1.0012487045533	0.0554393169229072
LRG1_P02750_OID30751_v1_Inflammation_II	48	MR Egger	-0.147706	0.129375751734351	0.862684373195991	0.66946067041005	1.11167744521977	0.259493311593591
LRG1_P02750_OID30751_v1_Inflammation_II	48	Weighted median	-0.165355	0.103733071264545	0.847593118358259	0.691652656209866	1.03869201952474	0.110927277578723
LRG1_P02750_OID30751_v1_Inflammation_II	48	Inverse variance weighted	-0.18827	0.071881236467276	0.828391393130305	0.719530212376859	0.953722704631822	0.00881427108217388
LRG1_P02750_OID30751_v1_Inflammation_II	48	Simple mode	-0.00233658	0.210492887631154	0.997666151524305	0.660404577270881	1.50716361478072	0.991190250444637
LRG1_P02750_OID30751_v1_Inflammation_II	48	Weighted mode	-0.200479	0.0944870590089126	0.818338320715605	0.679992120392748	0.98483142240655	0.0391581718335189
LRIG1_Q96JA1_OID21429_v1_Oncology	86	MR Egger	-0.00402543	0.0860178592173847	0.995982656771161	0.841456938900865	1.17888558134026	0.962785576572754
LRIG1_Q96JA1_OID21429_v1_Oncology	86	Weighted median	-0.0658726	0.078463756279815	0.936250121243017	0.802790434774743	1.09189677848307	0.401172409635098
LRIG1_Q96JA1_OID21429_v1_Oncology	86	Inverse variance weighted	-0.127367	0.0508637252341181	0.880410346417961	0.796872905599245	0.972705148629575	0.012276794894516
LRIG1_Q96JA1_OID21429_v1_Oncology	86	Simple mode	-0.123914	0.140864573032908	0.88345581151671	0.67031430350957	1.16437045549559	0.381519615542782
LRIG1_Q96JA1_OID21429_v1_Oncology	86	Weighted mode	-0.032456	0.0805587897175467	0.968065010916218	0.826668705825662	1.13364623428464	0.688043399662962
LRRC25_Q8N386_OID21333_v1_Oncology	36	MR Egger	-0.185841	0.168831504553343	0.830405911505451	0.596455646379534	1.15611945674232	0.278739357692194
LRRC25_Q8N386_OID21333_v1_Oncology	36	Weighted median	0.0875565723282192	0.131631034977954	1.09150401161954	0.843293469655951	1.41277153239147	0.505943919644489
LRRC25_Q8N386_OID21333_v1_Oncology	36	Inverse variance weighted	0.203643544515601	0.0972501060812682	1.22586111065168	1.01311864072401	1.48327688604592	0.0362583109835723
LRRC25_Q8N386_OID21333_v1_Oncology	36	Simple mode	0.258642142347514	0.256670565322411	1.29517023530707	0.783149110947522	2.14194961722656	0.320523568759598
LRRC25_Q8N386_OID21333_v1_Oncology	36	Weighted mode	0.110900673841572	0.131125930196714	1.11728392582266	0.864065978279703	1.44470839297137	0.403433554053389
LTBR_P36941_OID20768_v1_Inflammation	21	MR Egger	-0.435787	0.187415014414973	0.646755369618748	0.447928980976483	0.933836670310566	0.0312875508382596
LTBR_P36941_OID20768_v1_Inflammation	21	Weighted median	-0.361346	0.152003248851896	0.69673793479343	0.517227585679209	0.938549611855567	0.0174434424882586
LTBR_P36941_OID20768_v1_Inflammation	21	Inverse variance weighted	-0.351497	0.113824174687364	0.703634235027089	0.562934503319591	0.879500428171616	0.00201463445241795
LTBR_P36941_OID20768_v1_Inflammation	21	Simple mode	-0.333054	0.289629335053681	0.716731665254983	0.406274088778335	1.26442786820072	0.263737524957103
LTBR_P36941_OID20768_v1_Inflammation	21	Weighted mode	-0.354623	0.147148448236937	0.70143784232832	0.525695070242342	0.935932395986505	0.0257034228482409
LY75_O60449_OID20580_v1_Inflammation	113	MR Egger	0.00185625136934465	0.0512248794996357	1.00185797527042	0.906155356521602	1.10766812267805	0.971158231959931
LY75_O60449_OID20580_v1_Inflammation	113	Weighted median	0.0466297446506769	0.0446201047918881	1.0477340081332	0.95999648043413	1.14349018373737	0.296004997136359
LY75_O60449_OID20580_v1_Inflammation	113	Inverse variance weighted	0.0651001120879573	0.0284269322409575	1.06726586525025	1.00942748630761	1.12841827925146	0.022016346987831
LY75_O60449_OID20580_v1_Inflammation	113	Simple mode	0.0316361991834095	0.0695503877217731	1.03214194291264	0.900610366292938	1.1828833313395	0.650085146940578
LY75_O60449_OID20580_v1_Inflammation	113	Weighted mode	0.0454305196258713	0.0394180318039881	1.04647829238467	0.968672382601555	1.1305337450534	0.251556779145747
LYPD3_O95274_OID21530_v1_Oncology	43	MR Egger	0.233909492535363	0.111300144757528	1.26353012812407	1.01588607179688	1.57154274381707	0.0417755310320628
LYPD3_O95274_OID21530_v1_Oncology	43	Weighted median	0.18935477115071	0.097116568422247	1.20846960659428	0.999006790602392	1.46185071392911	0.0512037848904088
LYPD3_O95274_OID21530_v1_Oncology	43	Inverse variance weighted	0.157317315082825	0.0728341724455105	1.17036693006504	1.01466888448517	1.34995639654886	0.030777450065749
LYPD3_O95274_OID21530_v1_Oncology	43	Simple mode	0.110179664900291	0.14833815211051	1.11647864446461	0.834799992105115	1.49320145583875	0.461761285042939
LYPD3_O95274_OID21530_v1_Oncology	43	Weighted mode	0.156912552792574	0.0954653552863987	1.16989330552513	0.970251906702588	1.4106134055061	0.107712809032432
MARCO_Q9UEW3_OID20210_v1_Cardiometabolic	23	MR Egger	-0.224656	0.209150265023359	0.798791322857998	0.5301527747824	1.20355415990254	0.294950105796833
MARCO_Q9UEW3_OID20210_v1_Cardiometabolic	23	Weighted median	-0.211645	0.170813739714758	0.809251807515008	0.579007364323553	1.13105381436971	0.215330475777562
MARCO_Q9UEW3_OID20210_v1_Cardiometabolic	23	Inverse variance weighted	-0.344054	0.119899359771277	0.708890612365621	0.56042671525326	0.896684413185069	0.00411090585746823
MARCO_Q9UEW3_OID20210_v1_Cardiometabolic	23	Simple mode	-0.632629	0.277988867857289	0.531193446764012	0.30805183997617	0.915970759684015	0.0329531973497951
MARCO_Q9UEW3_OID20210_v1_Cardiometabolic	23	Weighted mode	-0.267607	0.164725579455126	0.765208820433534	0.554067559978929	1.05681072339184	0.118498494225909
MCEE_Q96PE7_OID31033_v1_Neurology_II	12	MR Egger	0.334828495880571	0.419560154237987	1.39770065324578	0.614154099201552	3.18090706977854	0.44338208858991
MCEE_Q96PE7_OID31033_v1_Neurology_II	12	Weighted median	0.420413595870222	0.229769620052738	1.52259116282517	0.970508750979653	2.38873049498335	0.0672921268745234
MCEE_Q96PE7_OID31033_v1_Neurology_II	12	Inverse variance weighted	0.542495851034614	0.182401249912988	1.72029510887366	1.20320568752988	2.45960877037589	0.00293763758649425
MCEE_Q96PE7_OID31033_v1_Neurology_II	12	Simple mode	0.13352526654786	0.442212337216773	1.14285014164812	0.480364103153036	2.71899260933953	0.768323686821969
MCEE_Q96PE7_OID31033_v1_Neurology_II	12	Weighted mode	0.367367564937257	0.237919688124316	1.44392855909711	0.905783445817158	2.30179707236238	0.150833895649326
MCFD2_Q8NI22_OID20171_v1_Cardiometabolic	12	MR Egger	-0.773578	0.554970437855593	0.461359440536841	0.155467293525422	1.36911454844141	0.193543745036558
MCFD2_Q8NI22_OID20171_v1_Cardiometabolic	12	Weighted median	-0.741032	0.287841252223919	0.476621947127165	0.271118164879335	0.837894726029864	0.0100400852898102
MCFD2_Q8NI22_OID20171_v1_Cardiometabolic	12	Inverse variance weighted	-0.71726	0.223667856443165	0.488087556268071	0.314852983148085	0.756637146015829	0.00134215292365205
MCFD2_Q8NI22_OID20171_v1_Cardiometabolic	12	Simple mode	-0.588819	0.433040107434355	0.554982593521749	0.237502497606998	1.29685237930336	0.201132983206283
MCFD2_Q8NI22_OID20171_v1_Cardiometabolic	12	Weighted mode	-0.675943	0.329436159696466	0.508676743387999	0.266698247481436	0.970205210222955	0.0647726512339512
MDGA1_Q8NFP4_OID20951_v1_Neurology	127	MR Egger	-0.160111	0.0544552110907391	0.852049417563284	0.765793317812335	0.948021082299183	0.00390832358004098
MDGA1_Q8NFP4_OID20951_v1_Neurology	127	Weighted median	-0.141796	0.0510587561757057	0.86779859523266	0.785157623968395	0.959137858308679	0.00548451364619805
MDGA1_Q8NFP4_OID20951_v1_Neurology	127	Inverse variance weighted	-0.113467	0.0349208287151805	0.892733416990431	0.833674623728704	0.955976026050618	0.00115700823508782
MDGA1_Q8NFP4_OID20951_v1_Neurology	127	Simple mode	-0.0545747	0.0865096611524738	0.946887815676251	0.799208359772058	1.12185580207377	0.529280964947138
MDGA1_Q8NFP4_OID20951_v1_Neurology	127	Weighted mode	-0.130279	0.0396038557359104	0.8778505986033	0.812286297274744	0.948706971979757	0.00130133070556029
MEPE_Q9NQ76_OID20753_v1_Inflammation	16	MR Egger	0.920278912781068	0.412405605921822	2.50999036070832	1.11847251121635	5.63272816065663	0.0425104989311309
MEPE_Q9NQ76_OID20753_v1_Inflammation	16	Weighted median	0.52166342362252	0.28998880918175	1.68482790258284	0.954359692554296	2.97439747662037	0.0720331067677089
MEPE_Q9NQ76_OID20753_v1_Inflammation	16	Inverse variance weighted	0.541067462065753	0.199253132109309	1.71783961243647	1.16245171616085	2.53857677960323	0.00661802080135742
MEPE_Q9NQ76_OID20753_v1_Inflammation	16	Simple mode	0.240146158401105	0.431315063115281	1.27143496764367	0.54594809857805	2.96099003029307	0.585891967788269
MEPE_Q9NQ76_OID20753_v1_Inflammation	16	Weighted mode	0.516589646750223	0.304275900069184	1.67630111154673	0.923309189482755	3.04338508549556	0.110194896707811
MINDY1_Q8N5J2_OID31399_v1_Oncology_II	5	MR Egger	0.695730054300556	0.376738907124004	2.00517242446535	0.958219692046575	4.1960277848692	0.161952278254819
MINDY1_Q8N5J2_OID31399_v1_Oncology_II	5	Weighted median	0.685401734129174	0.273810106885224	1.9845689444902	1.16036420380075	3.39420492508683	0.0123075623749083
MINDY1_Q8N5J2_OID31399_v1_Oncology_II	5	Inverse variance weighted	0.622502230075651	0.240167581195519	1.86358533187671	1.1638968993357	2.98389856624605	0.0095433792967313
MINDY1_Q8N5J2_OID31399_v1_Oncology_II	5	Simple mode	0.435270597749218	0.468579788450167	1.54538117904634	0.616839889202946	3.8716740443563	0.405513915223237
MINDY1_Q8N5J2_OID31399_v1_Oncology_II	5	Weighted mode	0.670226987560599	0.262493186990938	1.95468095854642	1.16852274631435	3.26975034226343	0.0630835016145662
MLN_P12872_OID20541_v1_Inflammation	75	MR Egger	-0.0161135	0.106413274469792	0.98401560953972	0.798768959856051	1.21222376992757	0.88005898099711
MLN_P12872_OID20541_v1_Inflammation	75	Weighted median	-0.133623	0.0911016222718558	0.874919549843659	0.731847939487995	1.04596074866887	0.142443969996037
MLN_P12872_OID20541_v1_Inflammation	75	Inverse variance weighted	-0.14921	0.0624505638209813	0.861388472600921	0.762149312972387	0.973549523827531	0.0168830458969554
MLN_P12872_OID20541_v1_Inflammation	75	Simple mode	-0.0162063	0.17139252802072	0.983924324935501	0.703184731759915	1.37674644154577	0.924922615352725
MLN_P12872_OID20541_v1_Inflammation	75	Weighted mode	-0.0962099	0.0911659374404401	0.908273309407627	0.759651744604035	1.08597184228451	0.294708819333389
MMP1_P03956_OID20672_v1_Inflammation	96	MR Egger	0.0272005005920878	0.086754373275505	1.02757381126796	0.866894432855116	1.21803520427064	0.754569189844029
MMP1_P03956_OID20672_v1_Inflammation	96	Weighted median	0.0908964456553049	0.0771870666856475	1.09515559126672	0.941397123995885	1.27402744124805	0.238951170299495
MMP1_P03956_OID20672_v1_Inflammation	96	Inverse variance weighted	0.113647010343357	0.0485592828334795	1.12036	1.01864245666387	1.23222712730315	0.0192643022570321
MMP1_P03956_OID20672_v1_Inflammation	96	Simple mode	0.0579469880939389	0.128029309617173	1.0596588196875	0.824489840760556	1.36190497278377	0.651863522637241
MMP1_P03956_OID20672_v1_Inflammation	96	Weighted mode	0.0896945719550768	0.0735743278739824	1.09384014322347	0.946947987565271	1.26351845575327	0.225824069312951
MOCS2_O96007_OID30638_v1_Inflammation_II	56	MR Egger	-0.115835	0.102363625395101	0.890622601342455	0.728718902557916	1.08849738251295	0.262803675933855
MOCS2_O96007_OID30638_v1_Inflammation_II	56	Weighted median	-0.0776478	0.0901344999811547	0.92529029802598	0.775450308638109	1.1040838156666	0.388981757881493
MOCS2_O96007_OID30638_v1_Inflammation_II	56	Inverse variance weighted	-0.131676	0.0611166008204295	0.876624599976279	0.777660701654223	0.988182490961543	0.0312000693844268
MOCS2_O96007_OID30638_v1_Inflammation_II	56	Simple mode	-0.147158	0.159166319451853	0.863157355030697	0.631836730686561	1.17916636269946	0.359235412419823
MOCS2_O96007_OID30638_v1_Inflammation_II	56	Weighted mode	-0.0783598	0.0912931122030615	0.924631690345214	0.773140650184619	1.10580624959572	0.394434441209248
MPI_P34949_OID21288_v1_Oncology	23	MR Egger	0.268289162587877	0.258781178499003	1.30772523055938	0.787476344652385	2.17167828628109	0.311647654007472
MPI_P34949_OID21288_v1_Oncology	23	Weighted median	0.295012634975425	0.213531042729289	1.34314332916202	0.883814386181763	2.04119103612489	0.167097220953054
MPI_P34949_OID21288_v1_Oncology	23	Inverse variance weighted	0.339369205247947	0.141366628640057	1.40406163645354	1.06427159107096	1.85233646702606	0.0163668015525995
MPI_P34949_OID21288_v1_Oncology	23	Simple mode	0.391171688492079	0.355275358226416	1.47871236951738	0.736999538019879	2.96688146866209	0.282781356377446
MPI_P34949_OID21288_v1_Oncology	23	Weighted mode	0.295361976463055	0.226223745298502	1.34361262681853	0.862399581309554	2.0933392479213	0.205171344866304
MST1_P26927_OID30713_v1_Inflammation_II	45	MR Egger	0.13027906733378	0.0584745907155944	1.13914623747448	1.01579226993993	1.27747984381591	0.0311659476347026
MST1_P26927_OID30713_v1_Inflammation_II	45	Weighted median	0.0866274514855624	0.0429867176335043	1.09049034347553	1.00237630386904	1.18635006097345	0.0438821915417958
MST1_P26927_OID30713_v1_Inflammation_II	45	Inverse variance weighted	0.089826639911753	0.0316895289943976	1.09398461399588	1.02810280107892	1.16408819663147	0.00458853565771643
MST1_P26927_OID30713_v1_Inflammation_II	45	Simple mode	0.127672292728876	0.070752384538756	1.13618060703577	0.989057923858203	1.30518783649041	0.078001109953694
MST1_P26927_OID30713_v1_Inflammation_II	45	Weighted mode	0.100707348069308	0.0452994632675498	1.10595293513733	1.01199173118381	1.20863822998639	0.0313895623058706
MZB1_Q8WU39_OID20732_v1_Inflammation	4	MR Egger	0.176649899741104	0.787264378538568	1.19321327571567	0.255026381530034	5.58278681916067	0.843296403810069
MZB1_Q8WU39_OID20732_v1_Inflammation	4	Weighted median	-0.797691	0.435599835367759	0.450367734677844	0.191768470182915	1.05768740943381	0.0670637015371069
MZB1_Q8WU39_OID20732_v1_Inflammation	4	Inverse variance weighted	-0.872473	0.372888242462586	0.417916898041858	0.201224590314559	0.867958202304723	0.0192956254076758
MZB1_Q8WU39_OID20732_v1_Inflammation	4	Simple mode	-0.506541	0.715646850123815	0.602576248042024	0.148197580064902	2.45009489726747	0.530098786378954
MZB1_Q8WU39_OID20732_v1_Inflammation	4	Weighted mode	-0.659836	0.486385003026887	0.516936343113441	0.199258929765072	1.34108510542817	0.267965333565063
NCAM2_O15394_OID21095_v1_Neurology	84	MR Egger	-0.284181	0.0864059742202271	0.752630103901341	0.635376773962844	0.891521529447139	0.00148311685296131
NCAM2_O15394_OID21095_v1_Neurology	84	Weighted median	-0.277657	0.0784295490648785	0.757556513250644	0.649612624798192	0.883437065199831	0.000399807496185721
NCAM2_O15394_OID21095_v1_Neurology	84	Inverse variance weighted	-0.205072	0.0516783562544772	0.814588539196226	0.73612	0.90142126777117	7.24052034633456e-05
NCAM2_O15394_OID21095_v1_Neurology	84	Simple mode	-0.0542596	0.159210324376013	0.947186188676633	0.693286578595307	1.29407045184336	0.734111911974606
NCAM2_O15394_OID21095_v1_Neurology	84	Weighted mode	-0.259358	0.077594022393016	0.771547097103529	0.662694057664618	0.898280158338388	0.00124699863523008
NCAN_O14594_OID21055_v1_Neurology	12	MR Egger	-0.795267	0.460762145202261	0.451460565527306	0.182983177689374	1.11385453460769	0.115057970055179
NCAN_O14594_OID21055_v1_Neurology	12	Weighted median	-0.664942	0.283404885425212	0.514303393352552	0.295107523192048	0.896310529643173	0.0189628057540018
NCAN_O14594_OID21055_v1_Neurology	12	Inverse variance weighted	-0.571401	0.208630330511713	0.564733449392136	0.375192189882481	0.850028005546263	0.00616596650257639
NCAN_O14594_OID21055_v1_Neurology	12	Simple mode	0.385103667023693	0.452877564349879	1.46976667988096	0.604994229446302	3.57063586418892	0.413258032646364
NCAN_O14594_OID21055_v1_Neurology	12	Weighted mode	-0.813915	0.294243532577644	0.443119714737464	0.248917781239647	0.788835094910194	0.0183536353317355
NELL2_Q99435_OID20706_v1_Inflammation	20	MR Egger	0.499743102003993	0.421464167959956	1.64829777191004	0.72156943586223	3.76524477043167	0.251145938372605
NELL2_Q99435_OID20706_v1_Inflammation	20	Weighted median	0.414650123944526	0.234155545306665	1.51384099130949	0.956671941779517	2.39550722341249	0.0765886490372436
NELL2_Q99435_OID20706_v1_Inflammation	20	Inverse variance weighted	0.484300056868666	0.174101639780175	1.62303857646812	1.15380000006793	2.28311164894139	0.0054073540756715
NELL2_Q99435_OID20706_v1_Inflammation	20	Simple mode	0.650286894058879	0.353187663523624	1.91609046513718	0.958907247753252	3.82873596918974	0.0812624785688751
NELL2_Q99435_OID20706_v1_Inflammation	20	Weighted mode	0.452180135621728	0.243841424768091	1.57173504854885	0.974579622934142	2.53478628600856	0.0792701070540137
NHLRC3_Q5JS37_OID30614_v1_Inflammation_II	20	MR Egger	0.034153904067827	0.189548118734079	1.03474384576106	0.713651587341625	1.50030469395963	0.859019658136222
NHLRC3_Q5JS37_OID30614_v1_Inflammation_II	20	Weighted median	0.275017570774308	0.192522677443922	1.31655380753421	0.902734420302324	1.92007071974982	0.153149599092529
NHLRC3_Q5JS37_OID30614_v1_Inflammation_II	20	Inverse variance weighted	0.310760607114714	0.122264228780646	1.3644625394609	1.07371298245006	1.73394384907576	0.0110310639834029
NHLRC3_Q5JS37_OID30614_v1_Inflammation_II	20	Simple mode	0.265887657946669	0.293652071249702	1.30458849030443	0.733688738935582	2.31971821116397	0.376565559340968
NHLRC3_Q5JS37_OID30614_v1_Inflammation_II	20	Weighted mode	0.169244374966051	0.200066695579922	1.18440954360291	0.800205788818501	1.75308150300801	0.408114373050254
NID2_Q14112_OID21085_v1_Neurology	77	MR Egger	0.0274103627516923	0.0950193651246124	1.02779	0.853143434282099	1.2381871305788	0.773781734373407
NID2_Q14112_OID21085_v1_Neurology	77	Weighted median	0.251384243158603	0.0833751427166323	1.28580405083333	1.09195423099271	1.51406717444225	0.00256896061542214
NID2_Q14112_OID21085_v1_Neurology	77	Inverse variance weighted	0.155782870374227	0.0544434248401513	1.16857244384412	1.05029781542127	1.30016604477474	0.00421812307828627
NID2_Q14112_OID21085_v1_Neurology	77	Simple mode	0.324442260220779	0.155930489073968	1.38325893226155	1.01899668560111	1.87773454096432	0.0408324194964892
NID2_Q14112_OID21085_v1_Neurology	77	Weighted mode	0.178918004732392	0.0719122302921065	1.19592268014735	1.03870010605983	1.37694320867667	0.0150362639422363
NPC2_P61916_OID30418_v1_Cardiometabolic_II	14	MR Egger	0.255662564612626	0.240878022735084	1.29131691839048	0.805366069709381	2.07048626262986	0.309413109185818
NPC2_P61916_OID30418_v1_Cardiometabolic_II	14	Weighted median	0.472580668769289	0.217643245904804	1.60412858071065	1.04707431336529	2.45754142815559	0.0299043760097667
NPC2_P61916_OID30418_v1_Cardiometabolic_II	14	Inverse variance weighted	0.472717812151644	0.16018420901738	1.6043485914161	1.17205282478071	2.19609078051616	0.00316655948066545
NPC2_P61916_OID30418_v1_Cardiometabolic_II	14	Simple mode	0.480887194398527	0.323518184361335	1.61750881055557	0.857950865930074	3.04951583607135	0.161011326905325
NPC2_P61916_OID30418_v1_Cardiometabolic_II	14	Weighted mode	0.406077226133913	0.257899105680937	1.50091845811233	0.905375937485446	2.48819979041966	0.139371959333963
NPTXR_O95502_OID20191_v1_Cardiometabolic	20	MR Egger	0.0555900682563737	0.0618914109378534	1.05716422972341	0.936395735815997	1.19350843437235	0.380943496344616
NPTXR_O95502_OID20191_v1_Cardiometabolic	20	Weighted median	0.0673958408419373	0.0555007994358159	1.06971883278195	0.959458970241369	1.19264962515335	0.22462479420745
NPTXR_O95502_OID20191_v1_Cardiometabolic	20	Inverse variance weighted	0.0983592331629075	0.0500727211145849	1.10335907709472	1.00021672325941	1.21713747100744	0.0494921012145987
NPTXR_O95502_OID20191_v1_Cardiometabolic	20	Simple mode	0.234614457949601	0.17277512408398	1.26442118721026	0.901202960599209	1.77402983408219	0.190398405438558
NPTXR_O95502_OID20191_v1_Cardiometabolic	20	Weighted mode	0.0921128376893448	0.0531417589979041	1.09648854033393	0.9880272408078	1.21685624588716	0.099233904966006
NRP2_O60462_OID21081_v1_Neurology	28	MR Egger	-0.122118	0.303288336229291	0.885043574821121	0.488427839415573	1.60372129948491	0.69049885706053
NRP2_O60462_OID21081_v1_Neurology	28	Weighted median	-0.290801	0.185918779474534	0.74766441205563	0.51933722044632	1.07637590961434	0.117787158000225
NRP2_O60462_OID21081_v1_Neurology	28	Inverse variance weighted	-0.35197	0.131690671529034	0.703301347205205	0.543305481439037	0.910413757782339	0.00752432304500026
NRP2_O60462_OID21081_v1_Neurology	28	Simple mode	-0.451893	0.304957822833586	0.636422462517786	0.350074244563601	1.15699328667298	0.149965956974846
NRP2_O60462_OID21081_v1_Neurology	28	Weighted mode	-0.318811	0.185958164367443	0.72701275069174	0.504953332441219	1.04672552038242	0.0979094860165996
NTRK3_Q16288_OID21057_v1_Neurology	24	MR Egger	-0.415083	0.271272030427862	0.660285305079983	0.387989719213504	1.12368102172484	0.140235998958395
NTRK3_Q16288_OID21057_v1_Neurology	24	Weighted median	-0.500154	0.179811171180994	0.606437528635371	0.426312150029482	0.862669469101324	0.00541001856995028
NTRK3_Q16288_OID21057_v1_Neurology	24	Inverse variance weighted	-0.522232	0.13008401649423	0.593194832053792	0.459692701449541	0.765468121781679	5.95523449484217e-05
NTRK3_Q16288_OID21057_v1_Neurology	24	Simple mode	-0.4726	0.274118766815643	0.623379131952581	0.364265176489424	1.06680947626965	0.0981122798364031
NTRK3_Q16288_OID21057_v1_Neurology	24	Weighted mode	-0.426488	0.201241907106441	0.652797378344156	0.440025486763078	0.968453941856444	0.0450756224153097
NUCB2_P80303_OID21448_v1_Oncology	44	MR Egger	0.108934559333618	0.163142432372477	1.1150893757619	0.809916107136117	1.53525075619725	0.507960769082967
NUCB2_P80303_OID21448_v1_Oncology	44	Weighted median	0.0935829263738111	0.127867452533191	1.09810166115454	0.854672195538979	1.41086520016007	0.46424517893355
NUCB2_P80303_OID21448_v1_Oncology	44	Inverse variance weighted	0.167256557201857	0.0836812481765652	1.18205749177176	1.00324656950375	1.39273829218761	0.0456371405085328
NUCB2_P80303_OID21448_v1_Oncology	44	Simple mode	-0.0135164	0.28941096200159	0.986574571872521	0.559471970703336	1.73972859559315	0.962966163933507
NUCB2_P80303_OID21448_v1_Oncology	44	Weighted mode	0.0561133659013193	0.13703562994318	1.05771758604755	0.808579342950085	1.38361992745506	0.684220051522714
ODAM_A1E959_OID20793_v1_Neurology	27	MR Egger	0.217773712954458	0.157921662619892	1.24330569181271	0.912330699274827	1.69435166932623	0.180109035215886
ODAM_A1E959_OID20793_v1_Neurology	27	Weighted median	0.0955855759624461	0.148898802299545	1.10030297749144	0.821801763574966	1.47318574373695	0.520905692466323
ODAM_A1E959_OID20793_v1_Neurology	27	Inverse variance weighted	0.219408710292447	0.101071200327983	1.2453401560277	1.02153781905517	1.51817394841976	0.0299437885125978
ODAM_A1E959_OID20793_v1_Neurology	27	Simple mode	0.0235172933328689	0.244516423267821	1.02379600543865	0.633981885783766	1.65329370484513	0.924116092499176
ODAM_A1E959_OID20793_v1_Neurology	27	Weighted mode	0.0579957557038966	0.158987110649907	1.05971049797561	0.77598741154221	1.44717082109343	0.718223992020061
PAFAH2_Q99487_OID31286_v1_Oncology_II	4	MR Egger	1.07708993470073	0.891397855678431	2.93612279768061	0.511683063390029	16.8479625374832	0.350408005070573
PAFAH2_Q99487_OID31286_v1_Oncology_II	4	Weighted median	1.26689243616538	0.690732311905224	3.54980416140909	0.91672944381856	13.7457236367018	0.0666347891908362
PAFAH2_Q99487_OID31286_v1_Oncology_II	4	Inverse variance weighted	1.34210636619021	0.569022972155065	3.8270962875617	1.25460570102297	11.6743180605078	0.0183432536796876
PAFAH2_Q99487_OID31286_v1_Oncology_II	4	Simple mode	1.31450106937085	0.935059814067934	3.72289305642605	0.595582020280707	23.271240967034	0.254454389377349
PAFAH2_Q99487_OID31286_v1_Oncology_II	4	Weighted mode	1.20550780738494	0.760247866606828	3.33845393926412	0.752331662905616	14.8143103023784	0.210995417828748
PAM_P19021_OID20291_v1_Cardiometabolic	59	MR Egger	0.124504538836705	0.0775248665084953	1.13258716107676	0.972928970942418	1.31844534981149	0.113801504940455
PAM_P19021_OID20291_v1_Cardiometabolic	59	Weighted median	0.148677762881132	0.0693093354740087	1.16029903754288	1.01291414184536	1.32912929231122	0.0319421913892995
PAM_P19021_OID20291_v1_Cardiometabolic	59	Inverse variance weighted	0.137188265106727	0.0477506055020272	1.1470440765694	1.04456139365822	1.25958141051444	0.00406573215163317
PAM_P19021_OID20291_v1_Cardiometabolic	59	Simple mode	0.137536968901956	0.119799506329309	1.14744412493733	0.907310941471643	1.45113208677683	0.25565719616739
PAM_P19021_OID20291_v1_Cardiometabolic	59	Weighted mode	0.170787120767463	0.0661211750035081	1.18623819666418	1.04204967793962	1.35037809522418	0.0123405768243224
PARK7_Q99497_OID21160_v1_Neurology	15	MR Egger	-0.238535	0.389106198179629	0.787781424058946	0.367444586523206	1.68896098855207	0.550429996961733
PARK7_Q99497_OID21160_v1_Neurology	15	Weighted median	-0.537905	0.255636398847915	0.583970574194986	0.353825287498689	0.963813620943883	0.0353628554499874
PARK7_Q99497_OID21160_v1_Neurology	15	Inverse variance weighted	-0.537973	0.209450569191143	0.583930460585784	0.387322928553446	0.880337200984669	0.0102140288157172
PARK7_Q99497_OID21160_v1_Neurology	15	Simple mode	-0.228604	0.493608402565318	0.795643527225657	0.302378270947701	2.0935651904881	0.650389710744356
PARK7_Q99497_OID21160_v1_Neurology	15	Weighted mode	-0.528386	0.260463472014707	0.58955578764994	0.35384570123255	0.982281332063185	0.0619598962342612
PBLD_P30039_OID20839_v1_Neurology	47	MR Egger	-0.115458	0.111180928380184	0.890958325029049	0.716503429340341	1.1078896547214	0.304601047940001
PBLD_P30039_OID20839_v1_Neurology	47	Weighted median	-0.153093	0.0851515097052063	0.858050022911399	0.726156415907789	1.01389979581444	0.072194754507036
PBLD_P30039_OID20839_v1_Neurology	47	Inverse variance weighted	-0.125349	0.0594533699304007	0.882189036410283	0.78515233397434	0.99121847097246	0.0350001350693775
PBLD_P30039_OID20839_v1_Neurology	47	Simple mode	-0.257979	0.124471022265263	0.772611699293194	0.605353986896505	0.986082277156575	0.0438400968225017
PBLD_P30039_OID20839_v1_Neurology	47	Weighted mode	-0.136926	0.0789307394642641	0.872034996620675	0.747044912753166	1.01793750596422	0.0894804751593666
PCBD1_P61457_OID30610_v1_Inflammation_II	13	MR Egger	-0.118485	0.400577785025393	0.888264697990167	0.405101366420002	1.94769566113368	0.772902126828136
PCBD1_P61457_OID30610_v1_Inflammation_II	13	Weighted median	0.336313768734742	0.239925422194397	1.39977816253646	0.87464249018202	2.24020548545062	0.160992020474116
PCBD1_P61457_OID30610_v1_Inflammation_II	13	Inverse variance weighted	0.456702824536672	0.168156808514626	1.57885961618745	1.13554814313714	2.19523734215337	0.00660890548320682
PCBD1_P61457_OID30610_v1_Inflammation_II	13	Simple mode	0.282920795555984	0.405005487222663	1.32700005335325	0.599961399861029	2.93507072622908	0.498141902689328
PCBD1_P61457_OID30610_v1_Inflammation_II	13	Weighted mode	0.267804060088849	0.273707571897271	1.30709100362697	0.764400982855616	2.23506632000925	0.347175009783376
PCDH17_O14917_OID20132_v1_Cardiometabolic	6	MR Egger	0.638075045008214	0.516707587216194	1.89283375037521	0.687514866321026	5.21126128622003	0.284452639538297
PCDH17_O14917_OID20132_v1_Cardiometabolic	6	Weighted median	0.652925664952013	0.375747523420771	1.92115326573288	0.919854769211684	4.01240499475712	0.0822687591249209
PCDH17_O14917_OID20132_v1_Cardiometabolic	6	Inverse variance weighted	0.689701772221081	0.312186612956339	1.99312104053933	1.0809237621038	3.67512642566841	0.0271564780417929
PCDH17_O14917_OID20132_v1_Cardiometabolic	6	Simple mode	0.61172327365641	0.551568936279609	1.8436057000369	0.625407500158708	5.43466775877492	0.317877645307847
PCDH17_O14917_OID20132_v1_Cardiometabolic	6	Weighted mode	0.632505915370967	0.397552134645301	1.88232161273592	0.863556226786498	4.10295768112009	0.172483048122773
PDCD1LG2_Q9BQ51_OID21273_v1_Oncology	87	MR Egger	-0.137308	0.0870871089447157	0.871702133633366	0.734916613790924	1.03394670296178	0.118586523858553
PDCD1LG2_Q9BQ51_OID21273_v1_Oncology	87	Weighted median	-0.140493	0.0745236677392827	0.868929394431203	0.750842180578521	1.00558854049039	0.0594003276078181
PDCD1LG2_Q9BQ51_OID21273_v1_Oncology	87	Inverse variance weighted	-0.137144	0.0484651052099651	0.871844377146573	0.792838334534746	0.958723342266422	0.00465837700470453
PDCD1LG2_Q9BQ51_OID21273_v1_Oncology	87	Simple mode	-0.0436587	0.120796853266392	0.957280627923874	0.75546598171335	1.21300789549785	0.718670098753559
PDCD1LG2_Q9BQ51_OID21273_v1_Oncology	87	Weighted mode	-0.116755	0.0681527791639632	0.88980280434005	0.77854004051755	1.01696635934754	0.0902893363460418
PDCD6_O75340_OID20163_v1_Cardiometabolic	64	MR Egger	0.0426334348056599	0.0588708400379544	1.04355529368173	0.929830087008102	1.17118994769812	0.471675502740546
PDCD6_O75340_OID20163_v1_Cardiometabolic	64	Weighted median	0.0806377779764067	0.0555997217542364	1.08397818467502	0.972060069375787	1.20878198978577	0.146967351622344
PDCD6_O75340_OID20163_v1_Cardiometabolic	64	Inverse variance weighted	0.0840555262596947	0.038077822693358	1.08768928744994	1.00946752996475	1.17197230313555	0.0272814697599181
PDCD6_O75340_OID20163_v1_Cardiometabolic	64	Simple mode	0.112585030831996	0.0896582509064756	1.11916741660355	0.938807204435709	1.33417777416815	0.213857315717651
PDCD6_O75340_OID20163_v1_Cardiometabolic	64	Weighted mode	0.0786950880043444	0.0547128167337375	1.08187439529264	0.971861443235976	1.20434061391775	0.155289807354469
PDGFRA_P16234_OID20133_v1_Cardiometabolic	16	MR Egger	0.418663649395223	0.213024086018463	1.51992903975272	1.00113708679257	2.30756038944173	0.0695347993337117
PDGFRA_P16234_OID20133_v1_Cardiometabolic	16	Weighted median	0.323594724333836	0.169511888883889	1.38208706734446	0.991388713487876	1.92675651410285	0.056264733623019
PDGFRA_P16234_OID20133_v1_Cardiometabolic	16	Inverse variance weighted	0.347945600050279	0.137798761580325	1.41615520887237	1.08097134166001	1.8552717341577	0.0115689385055235
PDGFRA_P16234_OID20133_v1_Cardiometabolic	16	Simple mode	0.524728475070381	0.296354053805347	1.68999990896883	0.945420506170468	3.02098343929898	0.0969391473106345
PDGFRA_P16234_OID20133_v1_Cardiometabolic	16	Weighted mode	0.371819346051129	0.164156528135922	1.45037094238662	1.05134736981199	2.00083809682771	0.0387518291575334
PFKFB2_O60825_OID21356_v1_Oncology	17	MR Egger	0.922000409924447	0.391908136104303	2.51431502332333	1.1663281296818	5.42024141888281	0.0327128288604257
PFKFB2_O60825_OID21356_v1_Oncology	17	Weighted median	0.619196246721437	0.231642934597244	1.85743452262898	1.17960082212469	2.9247716186224	0.00751620473442174
PFKFB2_O60825_OID21356_v1_Oncology	17	Inverse variance weighted	0.355307229614382	0.178201613597473	1.42661888652945	1.00605029651479	2.02300168734418	0.0461684848718815
PFKFB2_O60825_OID21356_v1_Oncology	17	Simple mode	0.477290211439199	0.377654989923581	1.61170111028869	0.768808343458832	3.37871004003338	0.224396188941413
PFKFB2_O60825_OID21356_v1_Oncology	17	Weighted mode	0.594277634280615	0.230111600713419	1.81172174647432	1.1540285373839	2.84424135133501	0.0200375333435891
PIK3AP1_Q6ZUJ8_OID20587_v1_Inflammation	21	MR Egger	0.335713643455232	0.248025137961211	1.3989383722903	0.860350317326587	2.27468803120503	0.191765511263981
PIK3AP1_Q6ZUJ8_OID20587_v1_Inflammation	21	Weighted median	0.332142591001404	0.190742188205706	1.3939515992966	0.959145880956445	2.02586603327109	0.0816280499281548
PIK3AP1_Q6ZUJ8_OID20587_v1_Inflammation	21	Inverse variance weighted	0.370988452291119	0.133781702841634	1.44916633873902	1.11491293283711	1.88362966782545	0.00555270804663946
PIK3AP1_Q6ZUJ8_OID20587_v1_Inflammation	21	Simple mode	0.334826160950408	0.260017462794846	1.39769738971618	0.839618156469214	2.32672194874225	0.212549700008712
PIK3AP1_Q6ZUJ8_OID20587_v1_Inflammation	21	Weighted mode	0.305954952722305	0.213744396992913	1.35792113451965	0.893164892242381	2.06451218984404	0.167755932155803
PIK3IP1_Q96FE7_OID21094_v1_Neurology	26	MR Egger	-0.355423	0.180136204954164	0.700876839761583	0.492387110795878	0.997646635632232	0.0601102063314922
PIK3IP1_Q96FE7_OID21094_v1_Neurology	26	Weighted median	-0.337045	0.153886974045454	0.713876741389315	0.527997657530222	0.965193679609189	0.028508928736832
PIK3IP1_Q96FE7_OID21094_v1_Neurology	26	Inverse variance weighted	-0.350939	0.110331289281206	0.704027010085741	0.56711800004532	0.873987478603498	0.00146883725476546
PIK3IP1_Q96FE7_OID21094_v1_Neurology	26	Simple mode	-0.694246	0.30240209587331	0.499450927554486	0.276110526038382	0.903447009478953	0.0303501979851451
PIK3IP1_Q96FE7_OID21094_v1_Neurology	26	Weighted mode	-0.323013	0.147657732917775	0.723964187045165	0.542036189353857	0.966954152542393	0.0382638594466608
PINLYP_A6NC86_OID30651_v1_Inflammation_II	71	MR Egger	-0.0625587	0.0716608141169801	0.939357874143261	0.816266858155005	1.08101070979337	0.385699719547594
PINLYP_A6NC86_OID30651_v1_Inflammation_II	71	Weighted median	-0.145107	0.0604030676925314	0.864929354033013	0.768359574299758	0.973636318841665	0.0162914873512361
PINLYP_A6NC86_OID30651_v1_Inflammation_II	71	Inverse variance weighted	-0.116149	0.0451922104382314	0.890342475180384	0.814870707720889	0.972804293490266	0.0101665352444911
PINLYP_A6NC86_OID30651_v1_Inflammation_II	71	Simple mode	-0.0618637	0.099008138937113	0.940010969318495	0.774204145250879	1.14132768192911	0.534110967549423
PINLYP_A6NC86_OID30651_v1_Inflammation_II	71	Weighted mode	-0.121673	0.0545270350002706	0.885437847891123	0.795689693411243	0.98530895771307	0.0288573606037107
PLTP_P55058_OID20238_v1_Cardiometabolic	45	MR Egger	-0.381022	0.12442261692248	0.683162899445786	0.535320165314182	0.871836290540741	0.00377971928597243
PLTP_P55058_OID20238_v1_Cardiometabolic	45	Weighted median	-0.274732	0.112064854439608	0.759775548659674	0.609949364221596	0.946404600450389	0.0142243741751453
PLTP_P55058_OID20238_v1_Cardiometabolic	45	Inverse variance weighted	-0.216965	0.0752614740105362	0.804958194444421	0.694559515954997	0.932904495466168	0.00394138359503837
PLTP_P55058_OID20238_v1_Cardiometabolic	45	Simple mode	-0.196036	0.201232502268457	0.821982348307604	0.554076750688806	1.21942489030506	0.335293514842746
PLTP_P55058_OID20238_v1_Cardiometabolic	45	Weighted mode	-0.255784	0.107336903063728	0.774309398489499	0.627404333845811	0.955611895305323	0.0215560477020389
PODXL2_Q9NZ53_OID21487_v1_Oncology	14	MR Egger	-0.0796674	0.10880125492892	0.923423393854993	0.746083395796163	1.14291615270264	0.478086964642095
PODXL2_Q9NZ53_OID21487_v1_Oncology	14	Weighted median	-0.111987	0.0961250383680847	0.894056240894762	0.740528119957873	1.07941419149396	0.244015090056586
PODXL2_Q9NZ53_OID21487_v1_Oncology	14	Inverse variance weighted	-0.174387	0.0858855447875269	0.839971755396059	0.709835035703693	0.993966928053487	0.0423099817043845
PODXL2_Q9NZ53_OID21487_v1_Oncology	14	Simple mode	-0.722879	0.31823328165806	0.485352862773605	0.260118929207696	0.905614220849115	0.0407523278339884
PODXL2_Q9NZ53_OID21487_v1_Oncology	14	Weighted mode	-0.102628	0.0931615585077099	0.902462586875159	0.751845296229349	1.08325306388691	0.29060808086125
PPCDC_Q96CD2_OID21027_v1_Neurology	30	MR Egger	0.00651879981093501	0.124099775821931	1.00654009343089	0.789214792929977	1.28371004796125	0.95848040649464
PPCDC_Q96CD2_OID21027_v1_Neurology	30	Weighted median	0.118409999999077	0.107021335354727	1.12570555604166	0.912696551974791	1.38842750765433	0.268546979473902
PPCDC_Q96CD2_OID21027_v1_Neurology	30	Inverse variance weighted	0.21447762173281	0.0950475418649024	1.23921438919349	1.02858537888296	1.49297504505839	0.024037463884862
PPCDC_Q96CD2_OID21027_v1_Neurology	30	Simple mode	0.387561589190736	0.233924186928358	1.47338369533407	0.931527267035735	2.33043045598042	0.108345035949422
PPCDC_Q96CD2_OID21027_v1_Neurology	30	Weighted mode	0.117049705883226	0.102074976234878	1.12417530642833	0.920335273566428	1.37316275479255	0.260877775706073
PRDX2_P32119_OID30668_v1_Inflammation_II	9	MR Egger	-0.848448	0.462170417565881	0.428078889456888	0.173028008688784	1.05908596525692	0.109015984393489
PRDX2_P32119_OID30668_v1_Inflammation_II	9	Weighted median	-1.21163	0.358565865273469	0.297712443212336	0.147427859652588	0.601193689254665	0.000727255430875494
PRDX2_P32119_OID30668_v1_Inflammation_II	9	Inverse variance weighted	-1.06863	0.273263681002237	0.343477417881883	0.201044153580631	0.586820031787145	9.20546348368475e-05
PRDX2_P32119_OID30668_v1_Inflammation_II	9	Simple mode	-1.65874	0.587626148981354	0.190379006784481	0.0601757595409181	0.602305089304276	0.0223978447582293
PRDX2_P32119_OID30668_v1_Inflammation_II	9	Weighted mode	-1.23383	0.403501904100179	0.291176113044981	0.132034671574967	0.642130796378321	0.0156347964564406
PRDX5_P30044_OID20644_v1_Inflammation	6	MR Egger	-0.57486	0.879405530329657	0.562783716289561	0.100409874296475	3.15432634031102	0.548983987860133
PRDX5_P30044_OID20644_v1_Inflammation	6	Weighted median	-0.96722	0.535634663210855	0.380138303884362	0.133045503887701	1.08613313383406	0.0709580283835996
PRDX5_P30044_OID20644_v1_Inflammation	6	Inverse variance weighted	-1.20372	0.400528214252366	0.300075293338416	0.136865421885036	0.657910379641197	0.00265287622109526
PRDX5_P30044_OID20644_v1_Inflammation	6	Simple mode	-0.780388	0.748371309246537	0.458228373480054	0.105695247083511	1.98659114819302	0.344821153064032
PRDX5_P30044_OID20644_v1_Inflammation	6	Weighted mode	-0.746623	0.716796254828667	0.473964539391853	0.116304511189827	1.93150190222871	0.345313845975256
PROS1_P07225_OID30737_v1_Inflammation_II	7	MR Egger	0.210283168365154	0.657417515164732	1.2340274480216	0.340188582284439	4.47641050221206	0.762006210888207
PROS1_P07225_OID30737_v1_Inflammation_II	7	Weighted median	-0.434616	0.399307772279651	0.647513207489378	0.296040407657803	1.41627069490401	0.276408053466024
PROS1_P07225_OID30737_v1_Inflammation_II	7	Inverse variance weighted	-0.610922	0.309296202844269	0.542850400676659	0.296075123935113	0.995310087514788	0.0482455871014494
PROS1_P07225_OID30737_v1_Inflammation_II	7	Simple mode	-0.342473	0.60073539604759	0.710012246378958	0.218730601413825	2.30474102274485	0.589310478845961
PROS1_P07225_OID30737_v1_Inflammation_II	7	Weighted mode	-0.286246	0.525706869398181	0.751077969129179	0.26803672448047	2.1046299413061	0.605728557630129
PSAP_P07602_OID30419_v1_Cardiometabolic_II	26	MR Egger	-0.0940412	0.332263772022193	0.910245274497288	0.474602258362421	1.7457701583711	0.77957944910971
PSAP_P07602_OID30419_v1_Cardiometabolic_II	26	Weighted median	-0.327065	0.157999355685933	0.721036610719384	0.529012032077771	0.982763647087077	0.0384483741604879
PSAP_P07602_OID30419_v1_Cardiometabolic_II	26	Inverse variance weighted	-0.290145	0.141468907720818	0.748155279640889	0.566984230062473	0.987216738625803	0.0402724542896512
PSAP_P07602_OID30419_v1_Cardiometabolic_II	26	Simple mode	-0.202037	0.244211085937227	0.817064827101295	0.506267259668723	1.31866108055834	0.415892026924717
PSAP_P07602_OID30419_v1_Cardiometabolic_II	26	Weighted mode	-0.247225	0.16228019949424	0.780964715313918	0.568192789323469	1.07341363358649	0.140197648388014
PSAPL1_Q6NUJ1_OID31473_v1_Oncology_II	48	MR Egger	0.165780581754397	0.0853667882149595	1.18031409086138	0.998462859465637	1.39528610391329	0.0582777804116273
PSAPL1_Q6NUJ1_OID31473_v1_Oncology_II	48	Weighted median	0.145962242280785	0.0752452237644801	1.15715249578692	0.998482755882833	1.34103657836532	0.0524014846320653
PSAPL1_Q6NUJ1_OID31473_v1_Oncology_II	48	Inverse variance weighted	0.166678216633336	0.0549587607895608	1.18137405761784	1.06073179809509	1.31573755639154	0.00242306543445988
PSAPL1_Q6NUJ1_OID31473_v1_Oncology_II	48	Simple mode	0.209529760930826	0.160865831388104	1.23309807271119	0.899633996802654	1.69016607012195	0.199087705161272
PSAPL1_Q6NUJ1_OID31473_v1_Oncology_II	48	Weighted mode	0.157784479948373	0.0647009305318178	1.17091381210666	1.03145523652933	1.32922797502629	0.0185736958741769
PSG1_P11464_OID20916_v1_Neurology	103	MR Egger	0.0623461145907171	0.0496037588638832	1.06433066135572	0.965723948910249	1.17300576213336	0.211695004733622
PSG1_P11464_OID20916_v1_Neurology	103	Weighted median	0.0643736022438276	0.0476214262015657	1.06649076768494	0.971451054200406	1.17082847626677	0.176446303832828
PSG1_P11464_OID20916_v1_Neurology	103	Inverse variance weighted	0.097624629638278	0.0306880644867886	1.10254884326451	1.0381871044247	1.17090064652414	0.00146670316466692
PSG1_P11464_OID20916_v1_Neurology	103	Simple mode	0.0708552923783778	0.0744410321346047	1.07342588172256	0.927697906849053	1.24204562179672	0.3434326959164
PSG1_P11464_OID20916_v1_Neurology	103	Weighted mode	0.056098160009225	0.0448711569049803	1.05770150263035	0.968652539730638	1.1549368042514	0.214085203805274
PTPRM_P28827_OID20598_v1_Inflammation	8	MR Egger	0.0864921396820562	0.795817850569416	1.09034279724304	0.229165495782798	5.18772431878909	0.916997221424427
PTPRM_P28827_OID20598_v1_Inflammation	8	Weighted median	0.926206621658193	0.462831241045739	2.52491303779799	1.01924014032397	6.25484181423224	0.0453734612992835
PTPRM_P28827_OID20598_v1_Inflammation	8	Inverse variance weighted	0.930421791843829	0.381560788273112	2.53557843840397	1.20028934291893	5.35634016516743	0.0147498763405226
PTPRM_P28827_OID20598_v1_Inflammation	8	Simple mode	1.84936280069396	0.951761376266188	6.35576834085766	0.984039247762538	41.0509959785635	0.0931096639182398
PTPRM_P28827_OID20598_v1_Inflammation	8	Weighted mode	0.481380519575661	0.640541564616772	1.61830696523476	0.461127386785527	5.67937951372517	0.476840668012817
PTX3_P26022_OID20570_v1_Inflammation	3	MR Egger	1.02910656645769	1.38995255796976	2.79856438613357	0.183562430771302	42.6664791396935	0.594268152437376
PTX3_P26022_OID20570_v1_Inflammation	3	Weighted median	1.27257671143348	0.550539059956362	3.57003968306226	1.21351384336477	10.5027	0.0208046845220108
PTX3_P26022_OID20570_v1_Inflammation	3	Inverse variance weighted	1.13532266636741	0.463709108131849	3.11217757594574	1.2541434309638	7.72291990300995	0.0143511767040924
PTX3_P26022_OID20570_v1_Inflammation	3	Simple mode	1.35483588930028	0.654643933838861	3.87612479088217	1.07436928629678	13.9843381471547	0.174355871006508
PTX3_P26022_OID20570_v1_Inflammation	3	Weighted mode	1.35483588930028	0.645835254875552	3.87612479088217	1.09307933341992	13.7449706852334	0.17082077037845
PYDC1_Q8WXC3_OID30202_v1_Cardiometabolic_II	32	MR Egger	0.287630997208192	0.214907469457847	1.33326523474764	0.874950782367685	2.03165277637259	0.190823700892425
PYDC1_Q8WXC3_OID30202_v1_Cardiometabolic_II	32	Weighted median	0.436585654971945	0.152025226334755	1.54741478058584	1.14868316384183	2.08455436498869	0.00408144495088701
PYDC1_Q8WXC3_OID30202_v1_Cardiometabolic_II	32	Inverse variance weighted	0.451966142892344	0.111890823343712	1.57139874466052	1.26195250554853	1.95672499865385	5.3599643976481e-05
PYDC1_Q8WXC3_OID30202_v1_Cardiometabolic_II	32	Simple mode	0.419575840678553	0.257651624494921	1.52131613832749	0.918125356895918	2.52079171471793	0.113549154853703
PYDC1_Q8WXC3_OID30202_v1_Cardiometabolic_II	32	Weighted mode	0.419575840678553	0.151808935617541	1.52131613832749	1.12978836420357	2.04852772967545	0.00952754075993117
QDPR_P09417_OID20174_v1_Cardiometabolic	30	MR Egger	-0.31624	0.155543399464266	0.728884591316379	0.537350373075552	0.988689641020772	0.0516177574939534
QDPR_P09417_OID20174_v1_Cardiometabolic	30	Weighted median	-0.177906	0.120420228511134	0.837021064224135	0.661047427642603	1.05983963125515	0.139574682394893
QDPR_P09417_OID20174_v1_Cardiometabolic	30	Inverse variance weighted	-0.181303	0.0903229938508115	0.834182531297761	0.698838151798016	0.995739133205572	0.0447204477605688
QDPR_P09417_OID20174_v1_Cardiometabolic	30	Simple mode	-0.657476	0.258110822226664	0.518157704425181	0.31243062141535	0.859350486962166	0.0164218804760515
QDPR_P09417_OID20174_v1_Cardiometabolic	30	Weighted mode	-0.199802	0.12931177035357	0.818893033739904	0.635557393876325	1.05511446671681	0.133161934306276
RABEPK_Q7Z6M1_OID21163_v1_Oncology	9	MR Egger	-0.301323	0.61444401580291	0.739838897842763	0.221876780703927	2.46696203642685	0.638848455195682
RABEPK_Q7Z6M1_OID21163_v1_Oncology	9	Weighted median	-0.666709	0.298766323558171	0.513395343118735	0.285849144121587	0.92207649998732	0.0256453633698329
RABEPK_Q7Z6M1_OID21163_v1_Oncology	9	Inverse variance weighted	-0.590087	0.254833499865573	0.554279051056761	0.336364233957872	0.913370791018353	0.0205812845635419
RABEPK_Q7Z6M1_OID21163_v1_Oncology	9	Simple mode	-0.385119	0.462872515086749	0.680369331948868	0.274624759887154	1.68558154787922	0.429531898156313
RABEPK_Q7Z6M1_OID21163_v1_Oncology	9	Weighted mode	-0.690059	0.33192494684558	0.501546238832288	0.261680137425386	0.961282855327678	0.0712299792375839
RASSF2_P50749_OID21194_v1_Oncology	7	MR Egger	0.617578842406723	1.16502449801067	1.85443272822978	0.18902628988144	18.1928172302736	0.6187303617544
RASSF2_P50749_OID21194_v1_Oncology	7	Weighted median	-0.849016	0.421770926873436	0.427835693149176	0.187179530171886	0.977902766207116	0.0441168304022442
RASSF2_P50749_OID21194_v1_Oncology	7	Inverse variance weighted	-1.11177	0.311052202304251	0.328977544776288	0.178810606054809	0.605256183371254	0.000351287381691926
RASSF2_P50749_OID21194_v1_Oncology	7	Simple mode	-0.860934	0.68144427916676	0.422766926255034	0.111184417128578	1.60752629326137	0.253317460253015
RASSF2_P50749_OID21194_v1_Oncology	7	Weighted mode	-0.704658	0.531128843378361	0.494277559648911	0.174527912874864	1.39983514354894	0.23285940487767
RBKS_Q9H477_OID20986_v1_Neurology	19	MR Egger	0.401879753288306	0.191715259009467	1.49463159733519	1.02646190539584	2.17633367591102	0.0513327085351578
RBKS_Q9H477_OID20986_v1_Neurology	19	Weighted median	0.217097762918218	0.169427048105375	1.24246556325972	0.891384638726515	1.73182328797111	0.200065754001447
RBKS_Q9H477_OID20986_v1_Neurology	19	Inverse variance weighted	0.317830352267916	0.129228147087309	1.37414312118821	1.06667164037343	1.77024423078111	0.0139149521219502
RBKS_Q9H477_OID20986_v1_Neurology	19	Simple mode	0.40488739518723	0.278873371286635	1.49913368088457	0.867877752360683	2.58953727878083	0.16374607873591
RBKS_Q9H477_OID20986_v1_Neurology	19	Weighted mode	0.12920239255403	0.195961548192009	1.13792040747868	0.775007756026834	1.67077405830713	0.518034042022198
RBP7_Q96R05_OID31526_v1_Oncology_II	21	MR Egger	0.0944312698648252	0.190566025333737	1.09903362380758	0.756480789656004	1.59670268270643	0.625908372293519
RBP7_Q96R05_OID31526_v1_Oncology_II	21	Weighted median	0.271698120777329	0.15742436584352	1.31219081837017	0.963817192899584	1.78648477792238	0.0843660816599535
RBP7_Q96R05_OID31526_v1_Oncology_II	21	Inverse variance weighted	0.269262408484182	0.113055469237667	1.30899858831811	1.04882835501747	1.63370612171357	0.0172336761838459
RBP7_Q96R05_OID31526_v1_Oncology_II	21	Simple mode	0.112756341154068	0.293137370480924	1.11935915795731	0.630152827936861	1.98835087133566	0.70455381330812
RBP7_Q96R05_OID31526_v1_Oncology_II	21	Weighted mode	0.270363092075993	0.165705322890291	1.31044017480574	0.947034892864516	1.81329480538006	0.118412895234221
REG3A_Q06141_OID20258_v1_Cardiometabolic	27	MR Egger	0.394922195845575	0.21234613498759	1.48426870415683	0.978948513513282	2.25042845024914	0.074719690878386
REG3A_Q06141_OID20258_v1_Cardiometabolic	27	Weighted median	0.0232066427949177	0.180182024954937	1.02347801205378	0.718959589844408	1.45697651989627	0.897519427707465
REG3A_Q06141_OID20258_v1_Cardiometabolic	27	Inverse variance weighted	0.287812317598801	0.118523187400211	1.33350700483905	1.05707627947271	1.68222574518638	0.0151689205499849
REG3A_Q06141_OID20258_v1_Cardiometabolic	27	Simple mode	0.020418846100267	0.350233535015638	1.02062873688002	0.513739535348552	2.0276481502218	0.95395492007953
REG3A_Q06141_OID20258_v1_Cardiometabolic	27	Weighted mode	-0.0630819	0.23648456578244	0.938866567293201	0.590614558474372	1.49246309379481	0.791767083261383
RGMA_Q96B86_OID21065_v1_Neurology	32	MR Egger	0.305639749829688	0.208466203129375	1.35749318129969	0.902168464785257	2.04262042978171	0.153015625860402
RGMA_Q96B86_OID21065_v1_Neurology	32	Weighted median	0.248824493036349	0.132174164641319	1.28251692266524	0.989815348753322	1.66177424809022	0.0597613579170838
RGMA_Q96B86_OID21065_v1_Neurology	32	Inverse variance weighted	0.197698658424613	0.0991036826573462	1.2186	1.00346141733276	1.47985169464341	0.0460573960030452
RGMA_Q96B86_OID21065_v1_Neurology	32	Simple mode	0.443271606342251	0.238544197916507	1.55779538399392	0.976017247043449	2.48635612305397	0.0726545217680584
RGMA_Q96B86_OID21065_v1_Neurology	32	Weighted mode	0.215469712706919	0.14655050750115	1.24044441265069	0.930745610811123	1.65319322809954	0.151564683646146
RNASE3_P12724_OID20203_v1_Cardiometabolic	18	MR Egger	0.307749864734717	0.222470577153314	1.36036067219869	0.879596089145029	2.10389880230556	0.18556336181583
RNASE3_P12724_OID20203_v1_Cardiometabolic	18	Weighted median	0.285790574146988	0.189434154725907	1.33081371926769	0.918052804186311	1.92915390848442	0.131387255143098
RNASE3_P12724_OID20203_v1_Cardiometabolic	18	Inverse variance weighted	0.267079317276208	0.130754284340677	1.30614404200988	1.01085946047851	1.68768491088795	0.0410915843119556
RNASE3_P12724_OID20203_v1_Cardiometabolic	18	Simple mode	-0.133969	0.330535940063779	0.874616977361806	0.457572621591939	1.67176710535729	0.690305398755732
RNASE3_P12724_OID20203_v1_Cardiometabolic	18	Weighted mode	0.274623958374615	0.207038250639428	1.31603569760464	0.877067771680794	1.97470482132829	0.202238603215709
RNASE6_Q93091_OID30689_v1_Inflammation_II	29	MR Egger	-0.0895674	0.156984948970891	0.914326664676458	0.672160673084751	1.24374019964862	0.573024533033184
RNASE6_Q93091_OID30689_v1_Inflammation_II	29	Weighted median	-0.146702	0.107441904864187	0.863551157907202	0.699570802089376	1.06596873410906	0.172124552991192
RNASE6_Q93091_OID30689_v1_Inflammation_II	29	Inverse variance weighted	-0.166865	0.0755540960494994	0.846313782097804	0.729824550450681	0.981396168882497	0.0272058748486115
RNASE6_Q93091_OID30689_v1_Inflammation_II	29	Simple mode	-0.0356614	0.175138081844127	0.964967011232475	0.684592160685329	1.36016943552899	0.840124221078588
RNASE6_Q93091_OID30689_v1_Inflammation_II	29	Weighted mode	-0.146176	0.105326911761346	0.864005754803626	0.702846615507214	1.06211786165472	0.176134684135771
RNF149_Q8NC42_OID30235_v1_Cardiometabolic_II	23	MR Egger	0.0983736123052892	0.228677314163614	1.10337494256606	0.704805131600365	1.72733740050711	0.671443307726315
RNF149_Q8NC42_OID30235_v1_Cardiometabolic_II	23	Weighted median	-0.0313178	0.156149945039827	0.969167562643076	0.713643564227479	1.31618333235626	0.841041006252169
RNF149_Q8NC42_OID30235_v1_Cardiometabolic_II	23	Inverse variance weighted	-0.227076	0.11509552469237	0.796860527786292	0.635932508231018	0.998512723480985	0.0485033416118004
RNF149_Q8NC42_OID30235_v1_Cardiometabolic_II	23	Simple mode	-0.287506	0.287242752336953	0.750132271256229	0.427200628167741	1.3171760228758	0.327750287517235
RNF149_Q8NC42_OID30235_v1_Cardiometabolic_II	23	Weighted mode	-0.1085	0.151194435702598	0.897178529219013	0.667082534077834	1.20664126576828	0.480541849764543
ROBO2_Q9HCK4_OID21007_v1_Neurology	13	MR Egger	0.170375933580505	0.585943039594251	1.18575053098484	0.376035237200615	3.73902278998584	0.776634611437989
ROBO2_Q9HCK4_OID21007_v1_Neurology	13	Weighted median	0.666692512194485	0.306802030973835	1.94778438191956	1.06754383817738	3.55382501661667	0.0297774474652271
ROBO2_Q9HCK4_OID21007_v1_Neurology	13	Inverse variance weighted	0.479073378285189	0.242723065058901	1.61457760614803	1.00334174198123	2.59817840442591	0.0484107726281815
ROBO2_Q9HCK4_OID21007_v1_Neurology	13	Simple mode	0.540236450976277	0.487832656411772	1.71641266165667	0.659735979147203	4.46553245269953	0.289816118362842
ROBO2_Q9HCK4_OID21007_v1_Neurology	13	Weighted mode	0.524446263499004	0.330195975935937	1.6895230387312	0.884495503254882	3.22724998363384	0.138206540818168
ROBO4_Q8WZ75_OID30226_v1_Cardiometabolic_II	3	MR Egger	0.759305396167001	1.1554694466731	2.1367914813505	0.221925238062512	20.5739	0.62988307157414
ROBO4_Q8WZ75_OID30226_v1_Cardiometabolic_II	3	Weighted median	1.26241758541277	0.541068874675085	3.53395480578393	1.22375327498825	10.2053549719353	0.0196380690237298
ROBO4_Q8WZ75_OID30226_v1_Cardiometabolic_II	3	Inverse variance weighted	1.26470604823047	0.482646670886446	3.54205139078973	1.37536420621639	9.1220405462708	0.00878380454186681
ROBO4_Q8WZ75_OID30226_v1_Cardiometabolic_II	3	Simple mode	1.27354766731343	0.682651361835303	3.5735077174659	0.937583928056974	13.6200685876224	0.203090400488538
ROBO4_Q8WZ75_OID30226_v1_Cardiometabolic_II	3	Weighted mode	1.26067076547667	0.618498890969404	3.52778701165713	1.04960398845499	11.8571207202977	0.178393076383859
RTN4R_Q9BZR6_OID21424_v1_Oncology	49	MR Egger	-0.250595	0.152798233475156	0.778337148192713	0.576903636712328	1.05010382619385	0.107673401348121
RTN4R_Q9BZR6_OID21424_v1_Oncology	49	Weighted median	-0.249974	0.115076295125051	0.778820720124232	0.621559311916929	0.97587101096459	0.0298368645124991
RTN4R_Q9BZR6_OID21424_v1_Oncology	49	Inverse variance weighted	-0.217573	0.0771944296808789	0.804468799505741	0.691512412491173	0.935876258600737	0.00482474512389978
RTN4R_Q9BZR6_OID21424_v1_Oncology	49	Simple mode	-0.327722	0.201431942217998	0.72056300197865	0.485522799208747	1.06938549676068	0.110292657065164
RTN4R_Q9BZR6_OID21424_v1_Oncology	49	Weighted mode	-0.189978	0.112376833920421	0.826977016607538	0.663493003493417	1.03074332720358	0.0974080999569832
S100A4_P26447_OID21519_v1_Oncology	5	MR Egger	0.966125814856303	0.382827194959923	2.62774434544277	1.24083496605633	5.5648337884548	0.0859003323229499
S100A4_P26447_OID21519_v1_Oncology	5	Weighted median	0.775106594572217	0.273541705407724	2.17082351285471	1.26993390012849	3.71080315557058	0.00460275268481621
S100A4_P26447_OID21519_v1_Oncology	5	Inverse variance weighted	0.672570656784437	0.251176606119303	1.95926745666925	1.19753407952391	3.20552795314962	0.00741339348183297
S100A4_P26447_OID21519_v1_Oncology	5	Simple mode	0.616847254941256	0.470992370533279	1.8530765446342	0.736167362572482	4.66455435931573	0.260461316087083
S100A4_P26447_OID21519_v1_Oncology	5	Weighted mode	0.79506455167831	0.280996906203092	2.21458394730073	1.27674084442619	3.84132933559143	0.0473718388808027
SAMD9L_Q8IVG5_OID20536_v1_Inflammation	10	MR Egger	0.0866113436216539	0.236155605416872	1.09047277814695	0.686428203254224	1.73234560328682	0.723312420586351
SAMD9L_Q8IVG5_OID20536_v1_Inflammation	10	Weighted median	0.315030263077955	0.200299044229072	1.37030077984883	0.925375328145295	2.02914878984052	0.115765220873447
SAMD9L_Q8IVG5_OID20536_v1_Inflammation	10	Inverse variance weighted	0.325943406371339	0.159178922381759	1.38533696540845	1.01405051197885	1.89256697280491	0.0405938838048735
SAMD9L_Q8IVG5_OID20536_v1_Inflammation	10	Simple mode	0.506067381098318	0.36842694465565	1.6587550997253	0.805695475017993	3.41502287921282	0.202811720903027
SAMD9L_Q8IVG5_OID20536_v1_Inflammation	10	Weighted mode	0.325299425570136	0.209715488789441	1.3844451221953	0.917830145236105	2.08828213620866	0.155280417203795
SAT2_Q96F10_OID31306_v1_Oncology_II	55	MR Egger	-0.0169371	0.085124596296901	0.983205522376257	0.832117757474063	1.16172631883931	0.843048803289705
SAT2_Q96F10_OID31306_v1_Oncology_II	55	Weighted median	-0.123712	0.075398700664476	0.88363391290834	0.762239947531497	1.02436102249737	0.100843786174496
SAT2_Q96F10_OID31306_v1_Oncology_II	55	Inverse variance weighted	-0.148151	0.0522483728602056	0.862300819728776	0.778366410359995	0.955286217144211	0.00457517420027359
SAT2_Q96F10_OID31306_v1_Oncology_II	55	Simple mode	-0.0983793	0.117718744462456	0.906305114742001	0.719565301266862	1.14150718435336	0.406998214901025
SAT2_Q96F10_OID31306_v1_Oncology_II	55	Weighted mode	-0.145288	0.0698572125821033	0.864773082890343	0.754116604506072	0.991666912547935	0.042306449973729
SCG3_Q8WXD2_OID20728_v1_Inflammation	74	MR Egger	-0.121111	0.0933779241950395	0.885935261579284	0.737763378845146	1.06386588195549	0.198771283115472
SCG3_Q8WXD2_OID20728_v1_Inflammation	74	Weighted median	-0.203797	0.0846353539968863	0.815627654110246	0.69095358500607	0.962797624305746	0.0160425681076557
SCG3_Q8WXD2_OID20728_v1_Inflammation	74	Inverse variance weighted	-0.170189	0.0520769720261114	0.843505373122783	0.761656302104612	0.934150104871426	0.00108299619632347
SCG3_Q8WXD2_OID20728_v1_Inflammation	74	Simple mode	-0.172356	0.161687625368391	0.841679893287402	0.613077908703102	1.15552205145164	0.28994637466413
SCG3_Q8WXD2_OID20728_v1_Inflammation	74	Weighted mode	-0.172356	0.0919543889965334	0.841679893287402	0.702868040636579	1.00790618125513	0.0648821942966143
SCGN_O76038_OID20457_v1_Inflammation	4	MR Egger	2.31819705553342	1.11599796144134	10.1573446590225	1.13978659909641	90.5183923060371	0.173386241693347
SCGN_O76038_OID20457_v1_Inflammation	4	Weighted median	1.38523630694636	0.497175313077417	3.99577002147371	1.50798254308416	10.587773802642	0.00533278221708862
SCGN_O76038_OID20457_v1_Inflammation	4	Inverse variance weighted	1.07628301432443	0.402672419589873	2.93375453599564	1.33248426975768	6.45930002538809	0.00752098509965574
SCGN_O76038_OID20457_v1_Inflammation	4	Simple mode	1.33411826507296	0.643431904145373	3.79664683400239	1.07572164383121	13.3998672098877	0.129813996440053
SCGN_O76038_OID20457_v1_Inflammation	4	Weighted mode	1.41931907124765	0.543673930200918	4.13430431489088	1.4243537015312	12.0001598969067	0.0796432650382022
SDC1_P18827_OID20169_v1_Cardiometabolic	9	MR Egger	-0.562124	0.626465733526673	0.569997167186277	0.166960716341144	1.94594739241855	0.399369852378656
SDC1_P18827_OID20169_v1_Cardiometabolic	9	Weighted median	-0.822135	0.328104072469394	0.439492429984215	0.231027444490432	0.83606342285204	0.0122204613986595
SDC1_P18827_OID20169_v1_Cardiometabolic	9	Inverse variance weighted	-0.905895	0.248439138393614	0.404180058964328	0.248370046719915	0.657734385534136	0.000265996802131766
SDC1_P18827_OID20169_v1_Cardiometabolic	9	Simple mode	-0.778366	0.501510860332774	0.459155734238021	0.171816690663788	1.22702857021148	0.1592532743078
SDC1_P18827_OID20169_v1_Cardiometabolic	9	Weighted mode	-0.799972	0.355038304314673	0.449341524673252	0.224058719060624	0.901137909929105	0.0542955597548913
SDK2_Q58EX2_OID30662_v1_Inflammation_II	47	MR Egger	0.096820671560861	0.110300650315789	1.10166279643619	0.887480612396617	1.36753513271029	0.384721026121254
SDK2_Q58EX2_OID30662_v1_Inflammation_II	47	Weighted median	0.127105377458612	0.0973972165694522	1.13553667144557	0.938199029967624	1.37438165145213	0.191885821256499
SDK2_Q58EX2_OID30662_v1_Inflammation_II	47	Inverse variance weighted	0.187975404319643	0.0664852281629457	1.20680383282325	1.05935936960246	1.37477000978754	0.0046938538196058
SDK2_Q58EX2_OID30662_v1_Inflammation_II	47	Simple mode	0.161854639998864	0.151393461565646	1.17568933069707	0.873823783232933	1.58183540988202	0.290603136016409
SDK2_Q58EX2_OID30662_v1_Inflammation_II	47	Weighted mode	0.17300517852531	0.0899303258781625	1.18887226167319	0.996747042173468	1.41803004651399	0.0605843518960263
SERPINA5_P05154_OID30763_v1_Inflammation_II	29	MR Egger	0.332373271413866	0.233438922582846	1.39427319371781	0.88234952304088	2.20320597218706	0.165955462120249
SERPINA5_P05154_OID30763_v1_Inflammation_II	29	Weighted median	-0.14706	0.152827050092423	0.863242597154471	0.639799433767307	1.16472091441866	0.335918487160177
SERPINA5_P05154_OID30763_v1_Inflammation_II	29	Inverse variance weighted	-0.23907	0.104837194130656	0.787359492393687	0.641111912347526	0.966968415845621	0.0225841965871575
SERPINA5_P05154_OID30763_v1_Inflammation_II	29	Simple mode	-0.313008	0.250062398665468	0.731243899269036	0.4479245281386	1.19376726798209	0.221028123768979
SERPINA5_P05154_OID30763_v1_Inflammation_II	29	Weighted mode	-0.0920055	0.171165182881172	0.912100134590866	0.652144408153519	1.27567858455797	0.595151976090473
SERPINA9_Q86WD7_OID21284_v1_Oncology	66	MR Egger	0.0527478144537253	0.0940293398305365	1.05416376673005	0.876735707642861	1.26749856016946	0.576775576845069
SERPINA9_Q86WD7_OID21284_v1_Oncology	66	Weighted median	0.116099667015499	0.0819036690976621	1.12310780335808	0.95654109756146	1.31867950177935	0.156332456497722
SERPINA9_Q86WD7_OID21284_v1_Oncology	66	Inverse variance weighted	0.121695188547699	0.054437028030573	1.12940979226922	1.01511165727184	1.2565775102039	0.0253830811627469
SERPINA9_Q86WD7_OID21284_v1_Oncology	66	Simple mode	0.12633593581909	0.126157954189536	1.13466327830298	0.886092746004366	1.45296388096479	0.320341739387243
SERPINA9_Q86WD7_OID21284_v1_Oncology	66	Weighted mode	0.169096538322109	0.0721748238023062	1.18423445741333	1.0280192408825	1.3641877450865	0.02220740120291
SEZ6L_Q9BYH1_OID21488_v1_Oncology	23	MR Egger	0.156629932720451	0.238174557997625	1.16956271691244	0.733306000565278	1.86535627382997	0.517922232762961
SEZ6L_Q9BYH1_OID21488_v1_Oncology	23	Weighted median	0.281139761997879	0.198646123186871	1.3246387251532	0.897442130322018	1.95518763036663	0.156986598395071
SEZ6L_Q9BYH1_OID21488_v1_Oncology	23	Inverse variance weighted	0.320431934731181	0.144754074351322	1.37772272212886	1.0373962301652	1.82969616032623	0.0268542546355911
SEZ6L_Q9BYH1_OID21488_v1_Oncology	23	Simple mode	0.438815914022972	0.333647325031937	1.55087	0.806434303877144	2.98250833936689	0.201983749423913
SEZ6L_Q9BYH1_OID21488_v1_Oncology	23	Weighted mode	0.294007686683862	0.218242599278661	1.34179421757529	0.874810657121018	2.05805874409852	0.191641813481341
SFTPA1_Q8IWL2_OID21165_v1_Oncology	14	MR Egger	-0.00649822	0.249327631772062	0.993522850646651	0.60946096562771	1.61960767042792	0.979635526334511
SFTPA1_Q8IWL2_OID21165_v1_Oncology	14	Weighted median	-0.174326	0.171039663681833	0.840023267860848	0.600757795295526	1.17458166348137	0.308102303161207
SFTPA1_Q8IWL2_OID21165_v1_Oncology	14	Inverse variance weighted	-0.301762	0.136874838112978	0.739514200260975	0.565504810290927	0.967067374911069	0.027478314015552
SFTPA1_Q8IWL2_OID21165_v1_Oncology	14	Simple mode	-0.26935	0.309657095835568	0.763875689136726	0.416329559737791	1.40154849639215	0.400167339765468
SFTPA1_Q8IWL2_OID21165_v1_Oncology	14	Weighted mode	-0.154499	0.1654894630392	0.856844526284721	0.619490358967897	1.18513957738951	0.367533916687965
SFTPA2_Q8IWL1_OID21218_v1_Oncology	36	MR Egger	-0.144609	0.0890087632665031	0.865360316423017	0.726827225313097	1.03029778076511	0.113470040150077
SFTPA2_Q8IWL1_OID21218_v1_Oncology	36	Weighted median	-0.175596	0.0844593224782834	0.83895681791631	0.710961987235848	0.989994619915977	0.0376117888397915
SFTPA2_Q8IWL1_OID21218_v1_Oncology	36	Inverse variance weighted	-0.157163	0.0593034943134178	0.854565125396155	0.760790379128521	0.959898512885872	0.00804584135753626
SFTPA2_Q8IWL1_OID21218_v1_Oncology	36	Simple mode	-0.214993	0.120509655893747	0.806547259107983	0.636868735790581	1.02143258825082	0.0830912383640217
SFTPA2_Q8IWL1_OID21218_v1_Oncology	36	Weighted mode	-0.154693	0.0849896660462243	0.856678413968507	0.725225656289017	1.01195800037599	0.0772991919433776
SFTPD_P35247_OID20214_v1_Cardiometabolic	83	MR Egger	0.114442572177743	0.0742154919919038	1.1212482483699	0.969456385282838	1.29680680178901	0.126964038634111
SFTPD_P35247_OID20214_v1_Cardiometabolic	83	Weighted median	0.0277356593706694	0.0608921530414892	1.02812387358591	0.9124582385087	1.15845159244208	0.648758029030109
SFTPD_P35247_OID20214_v1_Cardiometabolic	83	Inverse variance weighted	0.097257094142251	0.040505343909581	1.10214369188682	1.01802718294918	1.19321049369912	0.0163461855182782
SFTPD_P35247_OID20214_v1_Cardiometabolic	83	Simple mode	0.0113037478883902	0.10409020662007	1.01136787665056	0.824718587344145	1.24025940195504	0.913788475485175
SFTPD_P35247_OID20214_v1_Cardiometabolic	83	Weighted mode	0.0736517851651386	0.0602222033915625	1.07643191066802	0.956586812645909	1.2112916914456	0.224832738419974
SH3BP1_Q9Y3L3_OID31439_v1_Oncology_II	23	MR Egger	-0.345071	0.240633482932994	0.708170060160477	0.441881893135003	1.13492958616088	0.166292765954667
SH3BP1_Q9Y3L3_OID31439_v1_Oncology_II	23	Weighted median	-0.25444	0.177085651499919	0.775350277332111	0.547973550929805	1.09707494374303	0.150768864806932
SH3BP1_Q9Y3L3_OID31439_v1_Oncology_II	23	Inverse variance weighted	-0.247177	0.122209649101432	0.781002768570303	0.614646793001678	0.992383481797185	0.0431183321375596
SH3BP1_Q9Y3L3_OID31439_v1_Oncology_II	23	Simple mode	-0.180935	0.296752394821616	0.834489496373639	0.466466152993115	1.49286870031105	0.548295274663009
SH3BP1_Q9Y3L3_OID31439_v1_Oncology_II	23	Weighted mode	-0.384369	0.231709679459165	0.68088003886233	0.432349878552436	1.07227421659826	0.1113386986086
SH3GLB2_Q9NR46_OID31145_v1_Neurology_II	30	MR Egger	0.0614118175381493	0.25520299340934	1.06333672474418	0.644818724132595	1.75349280018299	0.811588125479421
SH3GLB2_Q9NR46_OID31145_v1_Neurology_II	30	Weighted median	-0.435834	0.170101567605201	0.646725248975306	0.463368427770987	0.902637129754742	0.0104012297616178
SH3GLB2_Q9NR46_OID31145_v1_Neurology_II	30	Inverse variance weighted	-0.480405	0.114748430511589	0.618532744382972	0.493954401481332	0.774530512789426	2.83171078245381e-05
SH3GLB2_Q9NR46_OID31145_v1_Neurology_II	30	Simple mode	-0.381365	0.288492179694495	0.682928498254295	0.387976780639989	1.20211145872835	0.196526226395576
SH3GLB2_Q9NR46_OID31145_v1_Neurology_II	30	Weighted mode	-0.414076	0.169435004905166	0.66095067361315	0.474179813706493	0.921287200176096	0.0208493332661773
SIGLEC6_O43699_OID21394_v1_Oncology	43	MR Egger	-0.0445678	0.0807707077487712	0.956410753413971	0.816377517497897	1.12046389034499	0.584093120642446
SIGLEC6_O43699_OID21394_v1_Oncology	43	Weighted median	-0.0735689	0.0909618425301036	0.92907214376012	0.777358148600198	1.11039557489088	0.41863685284381
SIGLEC6_O43699_OID21394_v1_Oncology	43	Inverse variance weighted	-0.122916	0.0591368744447243	0.884338156713818	0.787553453454849	0.993017009815994	0.0376636953805972
SIGLEC6_O43699_OID21394_v1_Oncology	43	Simple mode	-0.00369097	0.160481760588641	0.996315834981726	0.727431662524668	1.36458899739145	0.981759755615746
SIGLEC6_O43699_OID21394_v1_Oncology	43	Weighted mode	-0.0749773	0.0745540440641726	0.927764526756942	0.801633909337377	1.07374077753275	0.320329826653036
SNAP25_P60880_OID30811_v1_Neurology_II	7	MR Egger	0.422869787675419	1.04935649793806	1.52633553532805	0.195172997259606	11.9365906099518	0.703616020948198
SNAP25_P60880_OID30811_v1_Neurology_II	7	Weighted median	0.682736337107814	0.329602954815809	1.97928632360532	1.03739684914469	3.77635073216294	0.0383223441077658
SNAP25_P60880_OID30811_v1_Neurology_II	7	Inverse variance weighted	0.530384026247777	0.261807124438575	1.6995848685103	1.0173915647122	2.83921	0.0427793505264734
SNAP25_P60880_OID30811_v1_Neurology_II	7	Simple mode	0.534986153928732	0.497316982104909	1.70742460096783	0.644194144949593	4.52549715151211	0.323383861264787
SNAP25_P60880_OID30811_v1_Neurology_II	7	Weighted mode	0.73514514398264	0.44358196789355	2.0857847096354	0.87434913678418	4.97569869051369	0.148536085176173
SOD2_P04179_OID21114_v1_Neurology	15	MR Egger	0.53717241755516	0.433731387356174	1.71116156477334	0.73129298324109	4.00396826970815	0.237432316260051
SOD2_P04179_OID21114_v1_Neurology	15	Weighted median	0.304485288122009	0.245349578409534	1.35592691167656	0.838282699156731	2.19321929422879	0.214596020412333
SOD2_P04179_OID21114_v1_Neurology	15	Inverse variance weighted	0.451732855266846	0.189809158988534	1.57103219953555	1.08296960671428	2.27905026759323	0.0173158420213279
SOD2_P04179_OID21114_v1_Neurology	15	Simple mode	0.329229501460894	0.367051140710833	1.38989680233347	0.676927748821993	2.85379514209394	0.384906138060259
SOD2_P04179_OID21114_v1_Neurology	15	Weighted mode	0.337616420487271	0.24750548292491	1.4016027741718	0.862867334177435	2.27670032084227	0.194072554982567
SORD_Q00796_OID21453_v1_Oncology	8	MR Egger	-0.961765	0.469319259064451	0.382217622500404	0.152341451211757	0.958966255000381	0.0863284000733753
SORD_Q00796_OID21453_v1_Oncology	8	Weighted median	-0.61972	0.236108466962846	0.538095032715016	0.338750073798657	0.854748933293731	0.00867186543849706
SORD_Q00796_OID21453_v1_Oncology	8	Inverse variance weighted	-0.626441	0.195184963876366	0.534490571620194	0.364582025386654	0.783582709125352	0.00132977784599912
SORD_Q00796_OID21453_v1_Oncology	8	Simple mode	-0.403097	0.352176586670245	0.668247304967028	0.335087674385065	1.33264961600032	0.290003686353533
SORD_Q00796_OID21453_v1_Oncology	8	Weighted mode	-0.597464	0.300302335061593	0.550205438755221	0.30542344462167	0.991168262183719	0.0869501975979531
SPARCL1_Q14515_OID20361_v1_Cardiometabolic	78	MR Egger	0.0845062975733341	0.0710082478602869	1.08817969710187	0.946797664350936	1.2506738216306	0.23771483987867
SPARCL1_Q14515_OID20361_v1_Cardiometabolic	78	Weighted median	-0.0375093	0.0636156017110075	0.963185414996593	0.850274597205109	1.09109003927865	0.555442112290702
SPARCL1_Q14515_OID20361_v1_Cardiometabolic	78	Inverse variance weighted	-0.0870309	0.0408397342471561	0.916648745792142	0.846134620329481	0.993039290645168	0.0330862101519609
SPARCL1_Q14515_OID20361_v1_Cardiometabolic	78	Simple mode	-0.0741073	0.102963828996402	0.928572051324716	0.758876365370668	1.13621413691047	0.473863403497734
SPARCL1_Q14515_OID20361_v1_Cardiometabolic	78	Weighted mode	-0.058858	0.051121874420212	0.942840666076031	0.852947868005058	1.04220733171634	0.253160423909967
SPINK1_P00995_OID21097_v1_Neurology	57	MR Egger	0.0746003900675588	0.141757679157238	1.07745350372309	0.816078554337795	1.42254204146705	0.600828302533324
SPINK1_P00995_OID21097_v1_Neurology	57	Weighted median	0.146737497761078	0.120219165498168	1.1580499324272	0.914944321282648	1.46575000773227	0.222243857683096
SPINK1_P00995_OID21097_v1_Neurology	57	Inverse variance weighted	0.249722966782378	0.0807268941727935	1.28366974826331	1.09581486362134	1.50372848307685	0.00197857466834403
SPINK1_P00995_OID21097_v1_Neurology	57	Simple mode	0.0350361135289745	0.246091343967658	1.03565710935731	0.639350206559521	1.6776183649555	0.887298470615549
SPINK1_P00995_OID21097_v1_Neurology	57	Weighted mode	0.156030502898501	0.123139411575271	1.16886185622067	0.918215888099124	1.48792681180456	0.210362225639696
SPINK2_P20155_OID30627_v1_Inflammation_II	53	MR Egger	-0.0727759	0.098033898641717	0.929809143744836	0.767265505104564	1.12678732204139	0.461277922749333
SPINK2_P20155_OID30627_v1_Inflammation_II	53	Weighted median	-0.141402	0.0906001438439875	0.868140675014685	0.726891692375132	1.03683704122732	0.118589692225959
SPINK2_P20155_OID30627_v1_Inflammation_II	53	Inverse variance weighted	-0.146421	0.0635700423079404	0.863793858073935	0.762602455421646	0.978412571244228	0.0212617481878457
SPINK2_P20155_OID30627_v1_Inflammation_II	53	Simple mode	-0.241738	0.150144218471487	0.785261543016683	0.58507156314059	1.05394917440684	0.113443386874963
SPINK2_P20155_OID30627_v1_Inflammation_II	53	Weighted mode	-0.115946	0.0873626372422642	0.890523001666543	0.750378813330769	1.05684116130238	0.190245657442879
SPINK8_P0C7L1_OID30153_v1_Cardiometabolic_II	29	MR Egger	0.165010796527362	0.238146505636235	1.17940585213021	0.739518223213976	1.88095184185407	0.494292096722894
SPINK8_P0C7L1_OID30153_v1_Cardiometabolic_II	29	Weighted median	0.157587460589402	0.13776764022933	1.17068314214195	0.893653543405829	1.53359098658325	0.252679992998368
SPINK8_P0C7L1_OID30153_v1_Cardiometabolic_II	29	Inverse variance weighted	0.193299067573776	0.0949726687692719	1.21324558167984	1.00717827799012	1.46147397499779	0.0418194310947769
SPINK8_P0C7L1_OID30153_v1_Cardiometabolic_II	29	Simple mode	0.279815665897607	0.208312191756365	1.3228859368691	0.879434466375722	1.98994611750682	0.189977335644836
SPINK8_P0C7L1_OID30153_v1_Cardiometabolic_II	29	Weighted mode	0.172714859796911	0.126299737427601	1.18852715988713	0.927898779869663	1.52236088723793	0.182346263212735
SSC4D_Q8WTU2_OID20182_v1_Cardiometabolic	26	MR Egger	-0.253474	0.243077530953715	0.776099538210423	0.481954071505579	1.24976741316617	0.307444458662484
SSC4D_Q8WTU2_OID20182_v1_Cardiometabolic	26	Weighted median	-0.505981	0.198099365768293	0.602913631239408	0.408911682610252	0.888956863286192	0.0106438391967537
SSC4D_Q8WTU2_OID20182_v1_Cardiometabolic	26	Inverse variance weighted	-0.532573	0.136391878774532	0.587092153734668	0.449373196959678	0.767017702232336	9.43305854781129e-05
SSC4D_Q8WTU2_OID20182_v1_Cardiometabolic	26	Simple mode	-0.704334	0.33112375924834	0.494437543848323	0.25837661622754	0.946171090620175	0.043457941989985
SSC4D_Q8WTU2_OID20182_v1_Cardiometabolic	26	Weighted mode	-0.615368	0.234092874110819	0.540442105548644	0.341574388954316	0.855092415868789	0.0144446283079883
SUGP1_Q8IWZ8_OID31524_v1_Oncology_II	14	MR Egger	0.60301805508757	0.303206093311218	1.8276263621881	1.00877236584496	3.31117131362641	0.070015656093657
SUGP1_Q8IWZ8_OID31524_v1_Oncology_II	14	Weighted median	0.610224308668669	0.225017836897693	1.84084426980202	1.18434437134587	2.86125193621856	0.00669001735555778
SUGP1_Q8IWZ8_OID31524_v1_Oncology_II	14	Inverse variance weighted	0.493261425573543	0.177873003141882	1.63764858865442	1.15561230698078	2.3207548792282	0.00555233279663784
SUGP1_Q8IWZ8_OID31524_v1_Oncology_II	14	Simple mode	0.535147802951064	0.386541135640374	1.70770062679434	0.800536762718992	3.64285760075386	0.189524085210414
SUGP1_Q8IWZ8_OID31524_v1_Oncology_II	14	Weighted mode	0.593952280002783	0.252264905872686	1.81113239093373	1.10463290211375	2.96949378496021	0.0349331911088651
SUSD5_O60279_OID30650_v1_Inflammation_II	63	MR Egger	0.0936888418188398	0.0897954481691298	1.09821797324018	0.920986190753103	1.30955570111375	0.300899640354624
SUSD5_O60279_OID30650_v1_Inflammation_II	63	Weighted median	0.173278650083918	0.0834149934653341	1.18919742888354	1.00983329511828	1.40041978383925	0.0377731225637446
SUSD5_O60279_OID30650_v1_Inflammation_II	63	Inverse variance weighted	0.112857331599571	0.0542366531132368	1.11947220824575	1.00657501261015	1.24503192443143	0.0374493396787832
SUSD5_O60279_OID30650_v1_Inflammation_II	63	Simple mode	0.0989618481838428	0.153742633723138	1.1040241782279	0.816789625250493	1.49226844762872	0.522153613351566
SUSD5_O60279_OID30650_v1_Inflammation_II	63	Weighted mode	0.157762219308013	0.0762710922303785	1.1708877471055	1.00830517674592	1.35968568637754	0.0427758485567949
TACSTD2_P09758_OID21447_v1_Oncology	55	MR Egger	-0.0919823	0.0888578845884409	0.912121335634927	0.766328991910789	1.08565034039231	0.305293759704019
TACSTD2_P09758_OID21447_v1_Oncology	55	Weighted median	-0.0800756	0.0685002932282691	0.923046591803561	0.807077047073507	1.05567989292919	0.242411134682048
TACSTD2_P09758_OID21447_v1_Oncology	55	Inverse variance weighted	-0.128784	0.0491057917839546	0.879163734105466	0.798491083954378	0.967986852825557	0.00872654313722991
TACSTD2_P09758_OID21447_v1_Oncology	55	Simple mode	-0.120192	0.10474639881493	0.886749903855952	0.72216962108663	1.08883753764853	0.256250032594802
TACSTD2_P09758_OID21447_v1_Oncology	55	Weighted mode	-0.101098	0.071292809142487	0.903844359417176	0.785973652491234	1.03939187205688	0.161915964301665
TBC1D17_Q9HA65_OID20844_v1_Neurology	37	MR Egger	-0.230542	0.206663153291256	0.79410330521074	0.529616828322487	1.19067224760208	0.272218578457528
TBC1D17_Q9HA65_OID20844_v1_Neurology	37	Weighted median	-0.356671	0.125003745347806	0.700002470466712	0.547891088396388	0.894344640818455	0.00432696838907236
TBC1D17_Q9HA65_OID20844_v1_Neurology	37	Inverse variance weighted	-0.28195	0.0877916305026466	0.754311125594313	0.635068787963472	0.895942746643198	0.00132004499820166
TBC1D17_Q9HA65_OID20844_v1_Neurology	37	Simple mode	-0.110223	0.221035453039729	0.895634359618918	0.580739772673977	1.38127427098112	0.62104755887923
TBC1D17_Q9HA65_OID20844_v1_Neurology	37	Weighted mode	-0.333955	0.127908358103697	0.716086071376792	0.557297935038572	0.920116923785761	0.0130823575947589
TFPI_P10646_OID20388_v1_Cardiometabolic	38	MR Egger	-0.0401702	0.176230940327857	0.960625905171991	0.680054140595696	1.35695391675606	0.820981981588112
TFPI_P10646_OID20388_v1_Cardiometabolic	38	Weighted median	0.21673737091063	0.145475670198335	1.24201786927853	0.933891567096982	1.65180674283462	0.136262878798775
TFPI_P10646_OID20388_v1_Cardiometabolic	38	Inverse variance weighted	0.21466759466254	0.0908811358697327	1.23944982874443	1.03721638132958	1.4811141682947	0.0181732157164732
TFPI_P10646_OID20388_v1_Cardiometabolic	38	Simple mode	0.265986570759253	0.264855794213398	1.30471753720336	0.776366337414197	2.19263480376511	0.321771690747145
TFPI_P10646_OID20388_v1_Cardiometabolic	38	Weighted mode	0.191146993961476	0.135768913699374	1.21063739538934	0.927780525473817	1.57973018712221	0.167512021787354
TGFBR3_Q03167_OID20255_v1_Cardiometabolic	12	MR Egger	1.38371704293319	0.77804490847562	3.98970400098528	0.868271367616654	18.3326764064224	0.105692109192994
TGFBR3_Q03167_OID20255_v1_Cardiometabolic	12	Weighted median	1.11129045310395	0.360104044173187	3.03827661924322	1.50003212796858	6.15395140072186	0.00202851064584377
TGFBR3_Q03167_OID20255_v1_Cardiometabolic	12	Inverse variance weighted	1.03305861506009	0.257767544650973	2.8096463323758	1.69525678942605	4.65658805336825	6.1309282787763e-05
TGFBR3_Q03167_OID20255_v1_Cardiometabolic	12	Simple mode	1.10614391802487	0.522622100048757	3.02268019025175	1.0852437345787	8.41893414486028	0.0579177926762812
TGFBR3_Q03167_OID20255_v1_Cardiometabolic	12	Weighted mode	1.26295187957029	0.467144674865786	3.53584348169893	1.41531	8.83353648452063	0.0205258947051703
THBS2_P35442_OID21104_v1_Neurology	39	MR Egger	-0.280066	0.140395129391847	0.755733899051185	0.573934268657376	0.995120447348752	0.0534655207700281
THBS2_P35442_OID21104_v1_Neurology	39	Weighted median	-0.261105	0.115336822138173	0.770200161270887	0.614365642204238	0.965562277039731	0.0235835642964782
THBS2_P35442_OID21104_v1_Neurology	39	Inverse variance weighted	-0.253822	0.0747883793677287	0.775829876000012	0.670047121580365	0.898312935177652	0.000689124721852914
THBS2_P35442_OID21104_v1_Neurology	39	Simple mode	-0.159673	0.217655757644071	0.852422739646539	0.556394342574952	1.3059524000617	0.467693497504124
THBS2_P35442_OID21104_v1_Neurology	39	Weighted mode	-0.239405	0.121933126863923	0.787096131285683	0.619778069372219	0.999584126157302	0.0569470632922767
THSD1_Q9NS62_OID30476_v1_Inflammation_II	7	MR Egger	0.393958949148163	0.60877422972125	1.4828396755935	0.449671239951462	4.88982462776931	0.546077074949126
THSD1_Q9NS62_OID30476_v1_Inflammation_II	7	Weighted median	0.743928743452314	0.429057953717959	2.10418610403589	0.907533457426717	4.8787172794401	0.0829419670645911
THSD1_Q9NS62_OID30476_v1_Inflammation_II	7	Inverse variance weighted	0.770638871352411	0.347343803553725	2.16114650742767	1.0940047177619	4.26922676907808	0.0265096548906799
THSD1_Q9NS62_OID30476_v1_Inflammation_II	7	Simple mode	0.97904486074573	0.615890064394473	2.66191253017432	0.796044917692861	8.90122926585028	0.163017494154748
THSD1_Q9NS62_OID30476_v1_Inflammation_II	7	Weighted mode	0.792595084187501	0.465504576608435	2.2091218512473	0.887103262307878	5.50129794468571	0.139526700178658
TIMP4_Q99727_OID21147_v1_Neurology	41	MR Egger	-0.0792032	0.132672234868285	0.923852184238936	0.712310922314565	1.19821672191927	0.553968295388611
TIMP4_Q99727_OID21147_v1_Neurology	41	Weighted median	-0.188179	0.111610027291295	0.828466209504266	0.665687537406189	1.03104868534074	0.0917876505701592
TIMP4_Q99727_OID21147_v1_Neurology	41	Inverse variance weighted	-0.153469	0.0778201600155377	0.857727330626992	0.736389167281136	0.999058930240391	0.0485983549085018
TIMP4_Q99727_OID21147_v1_Neurology	41	Simple mode	-0.166704	0.18556318478549	0.846450193174776	0.588365009124273	1.2177439487641	0.374365768650201
TIMP4_Q99727_OID21147_v1_Neurology	41	Weighted mode	-0.147538	0.110863087326569	0.862829527799888	0.694314818073046	1.0722438505771	0.190786909257011
TMPRSS15_P98073_OID21364_v1_Oncology	6	MR Egger	-0.463587	0.859874723895287	0.629023059618258	0.116607484098967	3.39317851327367	0.618402036882861
TMPRSS15_P98073_OID21364_v1_Oncology	6	Weighted median	-0.860655	0.352047400060233	0.422885208543787	0.212106363504357	0.843123688749908	0.0144967843745071
TMPRSS15_P98073_OID21364_v1_Oncology	6	Inverse variance weighted	-0.951573	0.307696353513928	0.386133036788611	0.211261586504215	0.705754058590392	0.00198429686170415
TMPRSS15_P98073_OID21364_v1_Oncology	6	Simple mode	-0.81934	0.481798971379874	0.440722556758562	0.17141535202586	1.13313288302497	0.149763950248472
TMPRSS15_P98073_OID21364_v1_Oncology	6	Weighted mode	-0.878001	0.40902441142887	0.415612889689814	0.186431974954659	0.926526010993162	0.0846108261743915
TNC_P24821_OID20359_v1_Cardiometabolic	35	MR Egger	0.2512810685376	0.235729184706858	1.28567139533116	0.809978047538008	2.04073547647007	0.294172843131602
TNC_P24821_OID20359_v1_Cardiometabolic	35	Weighted median	0.192854415282436	0.159861479198558	1.21270622917303	0.886500061630489	1.65894675243472	0.227669258539641
TNC_P24821_OID20359_v1_Cardiometabolic	35	Inverse variance weighted	0.236805485395105	0.106622930917393	1.26719460594289	1.02821525876342	1.56171789481313	0.0263535305133827
TNC_P24821_OID20359_v1_Cardiometabolic	35	Simple mode	0.130470223295728	0.243193121357302	1.13936401288318	0.707379278892389	1.83515462297099	0.595114424070628
TNC_P24821_OID20359_v1_Cardiometabolic	35	Weighted mode	0.230506062227789	0.158477777778507	1.25923710104468	0.923014456380297	1.71793417284688	0.154977844807373
TNFRSF10C_O14798_OID20265_v1_Cardiometabolic	23	MR Egger	-0.181616	0.191805990980761	0.833921699611439	0.572607087461601	1.21448968465565	0.354473022292828
TNFRSF10C_O14798_OID20265_v1_Cardiometabolic	23	Weighted median	-0.18773	0.161791846462687	0.828838581175199	0.603601011095409	1.13812498822327	0.245919695130079
TNFRSF10C_O14798_OID20265_v1_Cardiometabolic	23	Inverse variance weighted	-0.219517	0.111759675256076	0.8029061756843	0.644960388274532	0.999531659109558	0.0495078778896258
TNFRSF10C_O14798_OID20265_v1_Cardiometabolic	23	Simple mode	-0.147524	0.268614424457137	0.86284201345552	0.509661783292471	1.46076548132459	0.588398317612301
TNFRSF10C_O14798_OID20265_v1_Cardiometabolic	23	Weighted mode	-0.198924	0.149874882464527	0.819611966486208	0.610987345009912	1.09947248677711	0.198030124770115
TNFRSF13C_Q96RJ3_OID20480_v1_Inflammation	29	MR Egger	-0.421376	0.12414852118012	0.656143389034777	0.514424214133046	0.836904902891479	0.00214219574309995
TNFRSF13C_Q96RJ3_OID20480_v1_Inflammation	29	Weighted median	-0.29311	0.100958207745351	0.745939724205097	0.612021070661921	0.909161626650179	0.00369270065934252
TNFRSF13C_Q96RJ3_OID20480_v1_Inflammation	29	Inverse variance weighted	-0.263199	0.0725384702712247	0.768588706149643	0.666726943633236	0.886012789586228	0.000285172370303489
TNFRSF13C_Q96RJ3_OID20480_v1_Inflammation	29	Simple mode	-0.128693	0.149918743045531	0.879243883136549	0.655384166897506	1.1795674126408	0.397950716237921
TNFRSF13C_Q96RJ3_OID20480_v1_Inflammation	29	Weighted mode	-0.264758	0.0981057475781262	0.767391670507596	0.633151707880832	0.930093007149049	0.0116644654068634
TNFRSF9_Q07011_OID20985_v1_Neurology	11	MR Egger	0.554344055242622	0.42182453265205	1.74079874238236	0.761525189230997	3.97935656539496	0.221298695152419
TNFRSF9_Q07011_OID20985_v1_Neurology	11	Weighted median	0.472731085929436	0.237610454376424	1.60436988732414	1.00703925525164	2.55601032624026	0.0466436811711
TNFRSF9_Q07011_OID20985_v1_Neurology	11	Inverse variance weighted	0.369657731813329	0.174776091239641	1.44723918595156	1.02746704407778	2.03850943290712	0.0344268757923953
TNFRSF9_Q07011_OID20985_v1_Neurology	11	Simple mode	0.428762109266663	0.39533389268878	1.53535574404559	0.707447172283312	3.33214599355238	0.303572512958197
TNFRSF9_Q07011_OID20985_v1_Neurology	11	Weighted mode	0.503822276088581	0.258066280392995	1.65503519768884	0.998014340553638	2.74459132928835	0.0794449986559216
TNFSF12_O43508_OID20624_v1_Inflammation	34	MR Egger	0.044182587780949	0.161556918273396	1.04517317331778	0.761497056512738	1.43452552164249	0.786241686555442
TNFSF12_O43508_OID20624_v1_Inflammation	34	Weighted median	-0.205484	0.132578754063901	0.814253493978925	0.627922893087061	1.05587606337672	0.121166003343792
TNFSF12_O43508_OID20624_v1_Inflammation	34	Inverse variance weighted	-0.223285	0.0975165731814534	0.79988714312083	0.660725294819463	0.968359236049572	0.0220381573758247
TNFSF12_O43508_OID20624_v1_Inflammation	34	Simple mode	-0.101698	0.211040019166884	0.903302434654312	0.597299690679641	1.36607351583251	0.633065468615152
TNFSF12_O43508_OID20624_v1_Inflammation	34	Weighted mode	-0.0886362	0.122960043915356	0.915178498525224	0.719184147117922	1.16458585401154	0.476075759272064
TNFSF13_O75888_OID20733_v1_Inflammation	28	MR Egger	0.113508009717029	0.178697474753861	1.12020086134836	0.789197209419887	1.59003346031597	0.530851270183463
TNFSF13_O75888_OID20733_v1_Inflammation	28	Weighted median	0.146993001880477	0.131809417280267	1.15834585675874	0.894622483364843	1.49981153930259	0.264767522295493
TNFSF13_O75888_OID20733_v1_Inflammation	28	Inverse variance weighted	0.250296881359677	0.0973891219083176	1.28440667649097	1.06121470741908	1.55453981091792	0.0101677904541667
TNFSF13_O75888_OID20733_v1_Inflammation	28	Simple mode	0.29080220956309	0.226544965570365	1.33750001307415	0.857935872507347	2.08512820398244	0.210175546941259
TNFSF13_O75888_OID20733_v1_Inflammation	28	Weighted mode	0.158148370794844	0.127393781197267	1.17133997445847	0.912521675028417	1.50356684483319	0.225130186972124
TNFSF14_O43557_OID20953_v1_Neurology	25	MR Egger	-0.193737	0.186126696910452	0.82387486432308	0.572040806429503	1.18657582542063	0.308747241461405
TNFSF14_O43557_OID20953_v1_Neurology	25	Weighted median	-0.294369	0.137986661802398	0.74500162540022	0.568460905485101	0.976368676356612	0.0328989756731133
TNFSF14_O43557_OID20953_v1_Neurology	25	Inverse variance weighted	-0.268386	0.109524225772963	0.764612845729319	0.616897040724372	0.947699154412867	0.0142670474176056
TNFSF14_O43557_OID20953_v1_Neurology	25	Simple mode	-0.283515	0.245388437618099	0.75313202783923	0.465577797954558	1.21828801512694	0.259311986454826
TNFSF14_O43557_OID20953_v1_Neurology	25	Weighted mode	-0.254315	0.131153955967761	0.775447187929048	0.599669173666342	1.00275012902638	0.0643384857461693
TNFSF8_P32971_OID30384_v1_Cardiometabolic_II	22	MR Egger	0.389213323651912	0.349514014201112	1.47581934492762	0.743910799722947	2.9278278251556	0.278662479213297
TNFSF8_P32971_OID30384_v1_Cardiometabolic_II	22	Weighted median	0.71518609092962	0.186425451326264	2.04456712225569	1.41877270597384	2.94638788849524	0.000124896008803088
TNFSF8_P32971_OID30384_v1_Cardiometabolic_II	22	Inverse variance weighted	0.677840465927172	0.149402585965777	1.96961967537635	1.4696310713692	2.63971124536401	5.70584169115063e-06
TNFSF8_P32971_OID30384_v1_Cardiometabolic_II	22	Simple mode	0.908355199703582	0.287839822372274	2.48023967760717	1.41084546866404	4.36021449195425	0.00476793192538178
TNFSF8_P32971_OID30384_v1_Cardiometabolic_II	22	Weighted mode	0.766632219641938	0.175460472690748	2.15250486965402	1.52612171908077	3.03598143972096	0.000268702528554428
TNR_Q92752_OID20957_v1_Neurology	51	MR Egger	0.140893624495596	0.136613988199607	1.15130217112142	0.88084835830268	1.50479554935313	0.307451527661776
TNR_Q92752_OID20957_v1_Neurology	51	Weighted median	0.220327479788471	0.121259454513392	1.24648486235534	0.982808439612402	1.58090269625051	0.0692183117768112
TNR_Q92752_OID20957_v1_Neurology	51	Inverse variance weighted	0.189476395810975	0.0800697833638632	1.20861659523816	1.03307482318925	1.41398671373631	0.0179624741702852
TNR_Q92752_OID20957_v1_Neurology	51	Simple mode	0.191002260358771	0.242524325278723	1.21046218815703	0.752506671071184	1.94711723534914	0.434672235272082
TNR_Q92752_OID20957_v1_Neurology	51	Weighted mode	0.216913704815315	0.112081974698511	1.24223689844968	0.997236858927279	1.54742827449221	0.05861768748137
TPK1_Q9H3S4_OID30338_v1_Cardiometabolic_II	47	MR Egger	-0.110191	0.139885962770468	0.895663437841603	0.680881463077562	1.1781977295435	0.434991914376231
TPK1_Q9H3S4_OID30338_v1_Cardiometabolic_II	47	Weighted median	-0.373117	0.119508870889147	0.688584594169529	0.544790213405158	0.870332710942061	0.0017957381842141
TPK1_Q9H3S4_OID30338_v1_Cardiometabolic_II	47	Inverse variance weighted	-0.313985	0.0815866627801698	0.730530237722805	0.622572921513379	0.857207902537838	0.000118852906309524
TPK1_Q9H3S4_OID30338_v1_Cardiometabolic_II	47	Simple mode	-0.380688	0.209331506065322	0.683391314381432	0.453401423776891	1.03004460083432	0.0754884357737313
TPK1_Q9H3S4_OID30338_v1_Cardiometabolic_II	47	Weighted mode	-0.264115	0.11796118877672	0.767884966360819	0.609376320389201	0.967624277205841	0.0300343498681401
TPMT_P51580_OID21270_v1_Oncology	37	MR Egger	0.219683027589865	0.112558092020492	1.24568182123386	0.999069600320136	1.55316826701092	0.0590085485682302
TPMT_P51580_OID21270_v1_Oncology	37	Weighted median	0.202619135079878	0.106455904785796	1.22460596996179	0.993983732354248	1.50873674573538	0.0569994367670811
TPMT_P51580_OID21270_v1_Oncology	37	Inverse variance weighted	0.205361147755787	0.0739152200711503	1.22796846294684	1.06235412302747	1.41940103898201	0.00546384716025434
TPMT_P51580_OID21270_v1_Oncology	37	Simple mode	0.395421618963216	0.146702980873452	1.48501016739701	1.11391827432796	1.97972799988666	0.0106192650385771
TPMT_P51580_OID21270_v1_Oncology	37	Weighted mode	0.220240071110033	0.0986617659269845	1.24637591352243	1.02722707317791	1.51227801366547	0.0319093690617854
TPSAB1_Q15661_OID20642_v1_Inflammation	116	MR Egger	-0.0474687	0.0414206620009731	0.953640285889559	0.879278815826245	1.03429057825866	0.254188487721816
TPSAB1_Q15661_OID20642_v1_Inflammation	116	Weighted median	-0.034703	0.0471925906871668	0.965892196071242	0.880557079410148	1.05949717087764	0.462126652111855
TPSAB1_Q15661_OID20642_v1_Inflammation	116	Inverse variance weighted	-0.0594417	0.0277850423095557	0.942290473105022	0.892346849720987	0.995029383453433	0.0324080210458581
TPSAB1_Q15661_OID20642_v1_Inflammation	116	Simple mode	-0.0860517	0.0799972579702961	0.917546760846649	0.784392018132495	1.07330523370773	0.284320389839478
TPSAB1_Q15661_OID20642_v1_Inflammation	116	Weighted mode	-0.0467879	0.0355507326583418	0.954289773624869	0.890059162516516	1.02315555009873	0.190761692031366
TPSD1_Q9BZJ3_OID30982_v1_Neurology_II	42	MR Egger	-0.20839	0.0944533361751368	0.811890360355001	0.674678828458774	0.977007028282126	0.0331697878989455
TPSD1_Q9BZJ3_OID30982_v1_Neurology_II	42	Weighted median	-0.203278	0.103351967770578	0.816051274829305	0.666411490239569	0.999292018376115	0.0492002034791997
TPSD1_Q9BZJ3_OID30982_v1_Neurology_II	42	Inverse variance weighted	-0.143866	0.0648845220183822	0.866003934876383	0.762586381389484	0.983446378697318	0.0266053596990262
TPSD1_Q9BZJ3_OID30982_v1_Neurology_II	42	Simple mode	-0.339123	0.189914918818853	0.712394829350776	0.490977868496779	1.03366449986747	0.0815529736736359
TPSD1_Q9BZJ3_OID30982_v1_Neurology_II	42	Weighted mode	-0.225492	0.0899966402604491	0.798123087745754	0.669057105475301	0.952086836803397	0.0162898051552145
TREML2_Q5T2D2_OID21120_v1_Neurology	36	MR Egger	-0.24307	0.177349444192525	0.784216956558823	0.553953529663335	1.11019463190017	0.179490810359168
TREML2_Q5T2D2_OID21120_v1_Neurology	36	Weighted median	-0.421839	0.141053559319218	0.65583951107046	0.497428155437196	0.864698669706579	0.00278401553874501
TREML2_Q5T2D2_OID21120_v1_Neurology	36	Inverse variance weighted	-0.192702	0.0944171651934568	0.824727679548013	0.685395197575621	0.992384755274866	0.0412544082708593
TREML2_Q5T2D2_OID21120_v1_Neurology	36	Simple mode	-0.374934	0.277131121843492	0.687334954611498	0.399272737452739	1.18322463698566	0.184759661762926
TREML2_Q5T2D2_OID21120_v1_Neurology	36	Weighted mode	-0.396944	0.183937713998296	0.672371528480607	0.468854805834409	0.964229153003531	0.0378683401858474
TSPAN8_P19075_OID31470_v1_Oncology_II	54	MR Egger	-0.100361	0.137668679902123	0.904510633942759	0.69060183969911	1.18467608958584	0.469269153378219
TSPAN8_P19075_OID31470_v1_Oncology_II	54	Weighted median	-0.0251894	0.102058843242815	0.975125216068879	0.798336794559972	1.19106271124266	0.805053402506603
TSPAN8_P19075_OID31470_v1_Oncology_II	54	Inverse variance weighted	-0.135303	0.0662515039045776	0.87345099037073	0.76708611729802	0.994564515476963	0.0411250565586758
TSPAN8_P19075_OID31470_v1_Oncology_II	54	Simple mode	0.040636091641002	0.162286311784813	1.04147303583293	0.757717177698921	1.43149200822006	0.803248066143578
TSPAN8_P19075_OID31470_v1_Oncology_II	54	Weighted mode	-0.0399232	0.104317920110592	0.960863227929723	0.783185010913019	1.17885	0.703467552173085
VCAN_P13611_OID21026_v1_Neurology	90	MR Egger	0.121206617049253	0.0800568571452865	1.12885812960895	0.964925075182393	1.32064209912188	0.133607660814492
VCAN_P13611_OID21026_v1_Neurology	90	Weighted median	0.228125009683603	0.0721816809111708	1.25624235807655	1.0905137495885	1.4471572346715	0.00157537503810796
VCAN_P13611_OID21026_v1_Neurology	90	Inverse variance weighted	0.199929323774986	0.0471274490616814	1.22131643707446	1.11355714171945	1.33950363531866	2.21229238988608e-05
VCAN_P13611_OID21026_v1_Neurology	90	Simple mode	0.224311226461788	0.130290431765334	1.25146044643204	0.969419325930591	1.6155581048278	0.0886116471464439
VCAN_P13611_OID21026_v1_Neurology	90	Weighted mode	0.173103525652167	0.0591156104690187	1.18898918959399	1.05890666651507	1.33505183948264	0.00432832299509686
VNN2_O95498_OID21310_v1_Oncology	73	MR Egger	0.086454344689147	0.0643345576070288	1.0903015885235	0.961134051350002	1.23682804939347	0.183284006531746
VNN2_O95498_OID21310_v1_Oncology	73	Weighted median	0.187322404440769	0.0616725523011099	1.20601604730651	1.06870133094044	1.36097398239496	0.0023865175187544
VNN2_O95498_OID21310_v1_Oncology	73	Inverse variance weighted	0.17087964520468	0.0446499075425156	1.18634795776344	1.08693936696396	1.29484819454162	0.000129662036524776
VNN2_O95498_OID21310_v1_Oncology	73	Simple mode	0.107082544377505	0.129733180334308	1.1130261247362	0.863126092493256	1.43527946278019	0.411867650247447
VNN2_O95498_OID21310_v1_Oncology	73	Weighted mode	0.120729446593367	0.0571746817463574	1.12831960035596	1.00870473816942	1.26211870765853	0.0381929786780305
VSIG10_Q8N0Z9_OID31400_v1_Oncology_II	67	MR Egger	-0.00340721	0.084483680622767	0.996598592844404	0.844512940897576	1.17607286657305	0.967953862802471
VSIG10_Q8N0Z9_OID31400_v1_Oncology_II	67	Weighted median	-0.0701919	0.0802655522145907	0.932214890042128	0.796512541096957	1.09103693460926	0.381848076828849
VSIG10_Q8N0Z9_OID31400_v1_Oncology_II	67	Inverse variance weighted	-0.152592	0.0549129117233506	0.85847952806007	0.77088062246693	0.956032722342631	0.00545587422658119
VSIG10_Q8N0Z9_OID31400_v1_Oncology_II	67	Simple mode	-0.316473	0.157764794877623	0.728714411902569	0.534890955204126	0.992771870505562	0.0489597715491114
VSIG10_Q8N0Z9_OID31400_v1_Oncology_II	67	Weighted mode	-0.0675964	0.0632916190429156	0.934637656946374	0.825597484771661	1.05807922855265	0.289404957958764
VWA1_Q6PCB0_OID21421_v1_Oncology	16	MR Egger	-0.221973	0.12655269540967	0.800937340578965	0.624992365531614	1.02641353544863	0.101285422123308
VWA1_Q6PCB0_OID21421_v1_Oncology	16	Weighted median	-0.303172	0.11590013307585	0.738472325900198	0.588407283449506	0.926809357157194	0.00890184958870304
VWA1_Q6PCB0_OID21421_v1_Oncology	16	Inverse variance weighted	-0.261136	0.0891132879298883	0.770176149486586	0.646748311236514	0.917159412606588	0.00338544934945554
VWA1_Q6PCB0_OID21421_v1_Oncology	16	Simple mode	-0.347224	0.16208414394571	0.706647354642304	0.514320611177691	0.970893394063198	0.0489894826168677
VWA1_Q6PCB0_OID21421_v1_Oncology	16	Weighted mode	-0.314132	0.121667710935993	0.730422935190625	0.575451538066031	0.927128748400824	0.0208366293221879
WFIKKN2_Q8TEU8_OID20785_v1_Inflammation	69	MR Egger	0.0673668323623308	0.0917547263673078	1.06968780231508	0.893621982749563	1.28044297981683	0.465385210563054
WFIKKN2_Q8TEU8_OID20785_v1_Inflammation	69	Weighted median	0.106289747456486	0.0844631378792034	1.11214407074254	0.942463579556713	1.31237372023389	0.208241419756123
WFIKKN2_Q8TEU8_OID20785_v1_Inflammation	69	Inverse variance weighted	0.115701702671342	0.0556641805765259	1.12266093542235	1.00662173613222	1.25207665469866	0.0376572099782443
WFIKKN2_Q8TEU8_OID20785_v1_Inflammation	69	Simple mode	0.0900988765726005	0.14063039195488	1.09428247725703	0.830658356788624	1.44157237478619	0.523884799096222
WFIKKN2_Q8TEU8_OID20785_v1_Inflammation	69	Weighted mode	0.0900988765726005	0.0792950379621891	1.09428247725703	0.936768213852323	1.27828220719341	0.259841140715216
WIF1_Q9Y5W5_OID21464_v1_Oncology	18	MR Egger	1.15290771328629	0.414295965685811	3.16738939306284	1.40619520452753	7.13439751108937	0.013304571592252
WIF1_Q9Y5W5_OID21464_v1_Oncology	18	Weighted median	0.78460943929332	0.19667420411913	2.19155083991967	1.49052439235705	3.22228546448509	6.62443724966324e-05
WIF1_Q9Y5W5_OID21464_v1_Oncology	18	Inverse variance weighted	0.610488943341224	0.161501952362271	1.84133148548682	1.34171026417425	2.52699985233531	0.000156783266416906
WIF1_Q9Y5W5_OID21464_v1_Oncology	18	Simple mode	0.656067485708514	0.290006353370073	1.92719867676564	1.09161148724137	3.40239616671056	0.0370709420705465
WIF1_Q9Y5W5_OID21464_v1_Oncology	18	Weighted mode	0.642682805928566	0.195691786349234	1.90157560046969	1.29579823726012	2.79054999484135	0.0043772292635287
YES1_P07947_OID21348_v1_Oncology	4	MR Egger	-1.91638	1.35495582622561	0.147138285903384	0.0103362738928207	2.09453381393302	0.292858993594559
YES1_P07947_OID21348_v1_Oncology	4	Weighted median	-1.53792	0.524079371201997	0.214828318633824	0.0769105934810171	0.600063065414086	0.00334074927449396
YES1_P07947_OID21348_v1_Oncology	4	Inverse variance weighted	-1.44906	0.435281722785683	0.234791856342773	0.100037711241514	0.551064344842875	0.000871562333160242
YES1_P07947_OID21348_v1_Oncology	4	Simple mode	-1.55876	0.705611524839603	0.210396244296967	0.0527727015924401	0.838815870298564	0.114198012335038
YES1_P07947_OID21348_v1_Oncology	4	Weighted mode	-1.57141	0.638143259160485	0.207752078880537	0.0594767007825457	0.725677882453274	0.0906682063138584
