# Supplementary material for: TNFSF8 Drives Oral Squamous Cell Carcinoma Progression via CD8+ T Cell Regulation: Insights from Multi-Omics Integration and Single-Cell eQTL Analysis
Source: Research Square preprint supplement (doi:10.21203/rs.3.rs-7101139/v1), 2025-08-11
Supplement: Supplementary file 7 [file 98e9f2b0288735be06b266d0.xlsx]

## Sheet: Sheet1
Table S7 Mendelian Randomization Analysis of TNFSF8 and Immune Cell Traits
id	nsnp	method	beta	se	OR	OR_lci95	OR_uci95	pvalue
ebi-a-GCST90001544	8	Inverse variance weighted	0.363477	0.132987	1.43832	1.10829	1.86662	0.00627272
ebi-a-GCST90001592	8	Inverse variance weighted	0.354042	0.173398	1.42482	1.01428	2.00151	0.0411724
ebi-a-GCST90001607	8	Inverse variance weighted	0.492967	0.137672	1.63717	1.24998	2.14428	0.000342633
ebi-a-GCST90001684	8	Inverse variance weighted	0.38075	0.179174	1.46338	1.03001	2.07909	0.0335846
ebi-a-GCST90001687	8	Inverse variance weighted	0.392108	0.166854	1.4801	1.06724	2.05267	0.018773
ebi-a-GCST90001973	8	Inverse variance weighted	0.270383	0.137771	1.31047	1.00035	1.71672	0.0496974
ebi-a-GCST90002081	8	Inverse variance weighted	0.403603	0.141293	1.49721	1.13504	1.97494	0.00428335
