# Supplementary material for: TNFSF8 Drives Oral Squamous Cell Carcinoma Progression via CD8+ T Cell Regulation: Insights from Multi-Omics Integration and Single-Cell eQTL Analysis
Source: Research Square preprint supplement (doi:10.21203/rs.3.rs-7101139/v1), 2025-08-11
Supplement: Supplementary file 8 [file afa44ee380700d9dc6cbde92.xlsx]

## Sheet: Sheet1
Table S5 Colocalization Analysis of UKB-PP cis-pQTL and OSCC: Replication Results
id	nsnps	topsnp	colorsnp	PP.H0.abf	PP.H1.abf	PP.H2.abf	PP.H3.abf	PP.H4.abf
TNFSF8_P32971_OID30384_v1_Cardiometabolic_II	22	rs10081728	rs10081728	4.21E-208	0.232321	2.82E-210	0.000943197	0.756736
REG3A_Q06141_OID20258_v1_Cardiometabolic	27	rs147616162	rs147616162	5.42E-148	0.302776	2.52E-150	0.000713273	0.696511
WIF1_Q9Y5W5_OID21464_v1_Oncology	18	rs462010	rs462010	2.11E-143	0.322312	8.17E-146	0.000572349	0.677115
PDCD1LG2_Q9BQ51_OID21273_v1_Oncology	87	rs62559136	rs2381281	0	0.325582	0	0.00237525	0.672043
LCN15_Q6UWW0_OID31032_v1_Neurology_II	53	rs2811724	rs2811724	0	0.416004	0	0.00342101	0.580575
TGFBR3_Q03167_OID20255_v1_Cardiometabolic	12	rs2634023	rs72712451	4.85E-21	0.449592	1.20E-23	0.000565166	0.549843
B3GNT7_Q8NFL0_OID30281_v1_Cardiometabolic_II	59	rs1729080	rs1729080	0	0.527147	0	0.00233898	0.470514
S100A4_P26447_OID21519_v1_Oncology	5	rs56350425	rs56350425	8.51E-94	0.536612	8.93E-97	0.000100219	0.463287
CSTB_P04080_OID20294_v1_Cardiometabolic	61	rs2276528	rs2838363	0	0.561697	0	0.00425915	0.434043
BCAT1_P54687_OID30312_v1_Cardiometabolic_II	45	rs11047639	rs11047639	8.55E-253	0.598417	4.04E-255	0.00242677	0.399157
DTYMK_P23919_OID30308_v1_Cardiometabolic_II	4	rs28630677	rs28630677	4.95E-08	0.625858	6.94E-11	0.000503383	0.373639
AOC1_P19801_OID20452_v1_Inflammation	15	rs1049742	rs1049742	8.42E-262	0.638845	1.15E-264	0.000508833	0.360646
IQGAP2_Q13576_OID21361_v1_Oncology	5	rs10037254	rs10037254	2.38E-73	0.642261	1.83E-76	0.000136021	0.357603
CLSTN2_Q9H4D0_OID20664_v1_Inflammation	92	rs16849559	rs16849559	0	0.643469	0	0.00459627	0.351935
SUGP1_Q8IWZ8_OID31524_v1_Oncology_II	14	rs17751061	rs17751061	2.18E-214	0.663213	2.94E-217	0.000556781	0.33623
SH3BP1_Q9Y3L3_OID31439_v1_Oncology_II	23	rs12710562	rs12710562	6.52E-154	0.677521	1.14E-156	0.000865347	0.321613
TPSD1_Q9BZJ3_OID30982_v1_Neurology_II	42	rs34777355	rs34777355	1.33E-243	0.677455	3.86E-246	0.00164793	0.320897
PYDC1_Q8WXC3_OID30202_v1_Cardiometabolic_II	32	rs12935054	rs12935054	0	0.688584	0	0.00166633	0.30975
SCGN_O76038_OID20457_v1_Inflammation	4	rs10946788	rs10946788	1.97E-21	0.708459	1.30E-24	0.000175945	0.291365
MINDY1_Q8N5J2_OID31399_v1_Oncology_II	5	rs140386498	rs140386498	5.57E-64	0.71522	4.10E-67	0.000241276	0.284539
CTSD_P07339_OID20358_v1_Cardiometabolic	31	rs72850955	rs72850955	0	0.731615	0	0.00222731	0.266158
EPHA4_P54764_OID30622_v1_Inflammation_II	15	rs10932916	rs10932916	8.22E-78	0.736174	1.22E-80	0.000832031	0.262994
PFKFB2_O60825_OID21356_v1_Oncology	17	rs1560	rs1560	4.41E-135	0.737446	5.87E-138	0.000719665	0.261835
NCAM2_O15394_OID21095_v1_Neurology	85	rs34952748	rs78102081	0	0.732552	0	0.00564573	0.261802
YES1_P07947_OID21348_v1_Oncology	4	rs2741189	rs2741189	1.48E-15	0.741168	9.27E-19	0.000205308	0.258627
SH3GLB2_Q9NR46_OID31145_v1_Neurology_II	30	rs62585602	rs62585602	1.96E-293	0.750573	6.57E-296	0.00227508	0.247152
LTBR_P36941_OID20768_v1_Inflammation	22	rs10849449	rs10849449	0	0.754755	0	0.00147035	0.243775
TREML2_Q5T2D2_OID21120_v1_Neurology	36	rs11759347	rs11759347	3.73E-258	0.770646	1.05E-260	0.00193098	0.227423
PLTP_P55058_OID20238_v1_Cardiometabolic	47	rs6065904	rs6065904	0	0.775578	0	0.00285959	0.221562
TBC1D17_Q9HA65_OID20844_v1_Neurology	38	rs2072451	rs2072451	0	0.777848	0	0.00193779	0.220215
GSTA1_P08263_OID20166_v1_Cardiometabolic	23	rs2749005	rs2749005	0	0.78221	0	0.00139999	0.21639
ROBO4_Q8WZ75_OID30226_v1_Cardiometabolic_II	3	rs59648931	rs59648931	2.18E-26	0.783557	9.00E-30	0.000106829	0.216336
SORD_Q00796_OID21453_v1_Oncology	8	rs56060952	rs56060952	6.88E-70	0.783286	5.55E-73	0.000415284	0.216299
CA4_P22748_OID20241_v1_Cardiometabolic	16	rs117154637	rs117154637	0	0.783986	0	0.000731978	0.215282
VNN2_O95498_OID21310_v1_Oncology	73	rs12205095	rs12205095	0	0.78139	0	0.00519832	0.213412
DBH_P09172_OID30703_v1_Inflammation_II	89	rs10821537	rs1611115	0	0.789187	0	0.00534193	0.205471
DBI_P07108_OID21143_v1_Neurology	28	rs72833212	rs72833212	3.70E-255	0.793446	1.06E-257	0.00207975	0.204475
TPK1_Q9H3S4_OID30338_v1_Cardiometabolic_II	48	rs9648818	rs9648818	0	0.798868	0	0.0037486	0.197383
TSPAN8_P19075_OID31470_v1_Oncology_II	54	rs10748164	rs10748164	0	0.801662	0	0.00370413	0.194634
SDC1_P18827_OID20169_v1_Cardiometabolic	9	rs907866	rs907866	4.49E-64	0.813309	4.29E-67	0.00058989	0.186101
DLK1_P80370_OID20295_v1_Cardiometabolic	51	rs8008285	rs12434496	0	0.815416	0	0.00269898	0.181885
TNFRSF9_Q07011_OID20985_v1_Neurology	11	rs2493214	rs2493214	4.34E-90	0.824284	3.56E-93	0.000500563	0.175215
BTD_P43251_OID30754_v1_Inflammation_II	70	rs7621044	rs13096588	0	0.823907	0	0.00542632	0.170667
ITGAM_P11215_OID21071_v1_Neurology	9	rs11150613	rs11150613	1.92E-88	0.832601	1.42E-91	0.000449259	0.16695
TMPRSS15_P98073_OID21364_v1_Oncology	7	rs2824805	rs2824805	3.06E-31	0.836152	1.67E-34	0.000293614	0.163554
CD226_Q15762_OID30556_v1_Inflammation_II	27	rs13381239	rs13381239	1.89E-253	0.822125	3.55E-255	0.0152919	0.162583
NTRK3_Q16288_OID21057_v1_Neurology	23	rs28735437	rs28735437	1.95E-138	0.836386	3.18E-141	0.00120385	0.16241
CST1_P01037_OID30581_v1_Inflammation_II	61	rs2424595	rs6048991	0	0.834216	0	0.00655436	0.15923
SFTPD_P35247_OID20214_v1_Cardiometabolic	82	rs7909837	rs2260034	0	0.838261	0	0.00597476	0.155764
TNR_Q92752_OID20957_v1_Neurology	51	rs2235256	rs2235256	0	0.84367	0	0.0030176	0.153312
MCFD2_Q8NI22_OID20171_v1_Cardiometabolic	12	rs6419615	rs6419615	1.69E-61	0.847366	1.45E-64	0.000574105	0.15206
CLEC12A_Q5QGZ9_OID30552_v1_Inflammation_II	48	rs28588142	rs28588142	0	0.839288	0	0.0107447	0.149968
GC_P02774_OID30780_v1_Inflammation_II	96	rs148189294	rs62302167	0	0.843036	0	0.0072873	0.149677
PIK3IP1_Q96FE7_OID21094_v1_Neurology	27	rs2413028	rs2413028	1.16105426772693e-321	0.850122	4.94065645841247e-324	0.00198446	0.147894
TNFRSF13C_Q96RJ3_OID20480_v1_Inflammation	29	rs73163373	rs73163373	0	0.850576	0	0.00202312	0.147401
RNASE3_P12724_OID20203_v1_Cardiometabolic	18	rs147307766	rs147307766	8.43E-245	0.852633	1.05E-247	0.000919327	0.146448
PARK7_Q99497_OID21160_v1_Neurology	15	rs3766606	rs3766606	2.18E-93	0.85566	4.11E-96	0.00146739	0.142872
CETN3_O15182_OID31525_v1_Oncology_II	10	rs4873	rs4873	3.06E-86	0.859001	2.40E-89	0.000532632	0.140467
RABEPK_Q7Z6M1_OID21163_v1_Oncology	9	rs7858935	rs7858935	3.83E-73	0.863	3.53E-76	0.000660125	0.13634
CHAD_O15335_OID30660_v1_Inflammation_II	9	rs137903671	rs137903671	2.25E-28	0.865581	1.85E-31	0.000577288	0.133842
PRDX2_P32119_OID30668_v1_Inflammation_II	9	rs74773471	rs74773471	2.47E-40	0.86691	4.66E-43	0.00150443	0.131585
TNFSF14_O43557_OID20953_v1_Neurology	25	rs344560	rs344560	4.78E-230	0.867833	9.06E-233	0.00151562	0.130651
CCL17_Q92583_OID20745_v1_Inflammation	14	rs9302690	rs9302690	9.66E-171	0.871579	1.48E-173	0.00120657	0.127215
PTX3_P26022_OID20570_v1_Inflammation	4	rs56025932	rs56025932	1.77E-09	0.874202	6.10E-13	0.000174961	0.125623
CD28_P10747_OID21265_v1_Oncology	15	rs13406632	rs13406632	1.16E-139	0.873493	1.70E-142	0.00114971	0.125357
PAFAH2_Q99487_OID31286_v1_Oncology_II	4	rs151045073	rs151045073	2.84E-05	0.875922	1.17E-08	0.000238176	0.123811
PDGFRA_P16234_OID20133_v1_Cardiometabolic	16	rs35597368	rs35597368	5.37E-278	0.875227	6.90E-281	0.00100185	0.123771
SCG3_Q8WXD2_OID20728_v1_Inflammation	74	rs2470179	rs2622778	0	0.872245	0	0.0052833	0.122472
VWA1_Q6PCB0_OID21421_v1_Oncology	16	rs115503338	rs115503338	0	0.877118	0	0.000770228	0.122111
MEPE_Q9NQ76_OID20753_v1_Inflammation	16	rs17013212	rs17013212	6.74E-63	0.876901	8.69E-66	0.0010084	0.122091
HSBP1_O75506_OID30232_v1_Cardiometabolic_II	67	rs16961631	rs514995	0	0.874982	0	0.00513945	0.119879
KLK15_Q9H2R5_OID31427_v1_Oncology_II	51	rs62114328	rs117944511	0	0.878596	0	0.00375771	0.117646
THBS2_P35442_OID21104_v1_Neurology	40	rs58316078	rs58316078	6.72508471500715e-317	0.881836	3.03771321689032e-319	0.00386898	0.114295
HBQ1_P09105_OID21433_v1_Oncology	44	rs1203834	rs1203834	0	0.882436	0	0.00348441	0.114079
EGFLAM_Q63HQ2_OID31496_v1_Oncology_II	46	rs35559057	rs113400125	0	0.883492	0	0.00387493	0.112633
NPC2_P61916_OID30418_v1_Cardiometabolic_II	15	rs56162252	rs117281113	3.06E-63	0.887575	4.58E-66	0.00121781	0.111207
PCDH17_O14917_OID20132_v1_Cardiometabolic	6	rs41292834	rs41292834	1.84E-16	0.889059	6.25E-20	0.000190657	0.11075
AGRN_O00468_OID20786_v1_Inflammation	30	rs2465141	rs2465141	4.63532388928258e-320	0.887183	1.48219693752374e-322	0.00272076	0.110096
VCAN_P13611_OID21026_v1_Neurology	92	rs35483733	rs13182546	0	0.882544	0	0.00752249	0.109933
TIMP4_Q99727_OID21147_v1_Neurology	41	rs2600261	rs2600261	0	0.888582	0	0.0021127	0.109306
CLEC14A_Q86T13_OID21090_v1_Neurology	4	rs10151239	rs10151239	3.40E-24	0.89184	8.61E-28	0.000117573	0.108043
GSTP1_P09211_OID20876_v1_Neurology	13	rs762803	rs762803	5.72E-145	0.893536	5.79E-148	0.00079802	0.105666
AGRP_O00253_OID20658_v1_Inflammation	5	rs77115810	rs77115810	1.78E-11	0.894685	9.73E-15	0.000384351	0.10493
CXCL10_P02778_OID20697_v1_Inflammation	5	rs143799975	rs143799975	1.09E-15	0.895687	4.89E-19	0.000296505	0.104017
DNM1_Q05193_OID31458_v1_Oncology_II	20	rs3003599	rs3003599	1.43E-244	0.894438	2.98E-247	0.00176161	0.1038
IL17RB_Q9NRM6_OID20585_v1_Inflammation	82	rs13082692	rs11130381	0	0.892843	0	0.00577083	0.101386
SAT2_Q96F10_OID31306_v1_Oncology_II	55	rs112399419	rs112399419	0	0.896725	0	0.00439795	0.098877
F2R_P25116_OID20691_v1_Inflammation	6	rs168753	rs168753	2.77E-45	0.902657	1.30E-48	0.000325347	0.0970173
C1QTNF9_P0C862_OID30620_v1_Inflammation_II	92	rs73455777	rs73455777	0	0.90053	0	0.00528866	0.0941816
INSL4_Q14641_OID31370_v1_Oncology_II	6	rs41313766	rs41313766	1.00E-96	0.906104	7.26E-100	0.000563687	0.0933318
NID2_Q14112_OID21085_v1_Neurology	78	rs36016197	rs36016197	0	0.900375	0	0.00659862	0.0930262
RNASE6_Q93091_OID30689_v1_Inflammation_II	32	rs67668132	rs67668132	0	0.905561	0	0.002089	0.0923497
AGT_P01019_OID30709_v1_Inflammation_II	45	rs12046036	rs6687360	0	0.906389	0	0.00260324	0.0910075
ROBO2_Q9HCK4_OID21007_v1_Neurology	13	rs775722	rs775722	1.09E-40	0.908667	1.03E-43	0.000773146	0.0905598
CES2_O00748_OID21366_v1_Oncology	4	rs74909952	rs74909952	2.07E-17	0.911043	8.79E-21	0.000297544	0.0886595
SFTPA2_Q8IWL1_OID21218_v1_Oncology	35	rs74347616	rs61860481	0	0.909278	0	0.00224522	0.088477
SPINK2_P20155_OID30627_v1_Inflammation_II	53	rs6841417	rs59156171	0	0.908628	0	0.0028966	0.0884756
SSC4D_Q8WTU2_OID20182_v1_Cardiometabolic	26	rs147014464	rs4727246	9.24E-111	0.911565	2.42E-113	0.00230242	0.0861331
CST7_O76096_OID20704_v1_Inflammation	90	rs4815316	rs6050061	0	0.907058	0	0.00700436	0.0859377
NHLRC3_Q5JS37_OID30614_v1_Inflammation_II	20	rs41286947	rs41286947	7.25E-179	0.912143	1.71E-181	0.00206717	0.0857897
PSAP_P07602_OID30419_v1_Cardiometabolic_II	27	rs57681041	rs57681041	1.60E-168	0.911679	4.81E-171	0.00265432	0.0856665
NCAN_O14594_OID21055_v1_Neurology	13	rs3761077	rs3761077	3.09E-95	0.913464	4.07E-98	0.00111728	0.0854186
GFRA1_P56159_OID21457_v1_Oncology	14	rs11197603	rs11197603	9.60E-190	0.918504	9.60E-193	0.000838072	0.0806584
SIGLEC6_O43699_OID21394_v1_Oncology	44	rs35931837	rs62617068	0	0.916184	0	0.00390992	0.0799061
CD302_Q8IX05_OID21328_v1_Oncology	28	rs2556106	rs2556106	0	0.917356	0	0.00277641	0.0798671
SAMD9L_Q8IVG5_OID20536_v1_Inflammation	10	rs17165120	rs17165120	1.64776443616774e-314	0.919646	1.33071443424623e-317	0.000663004	0.0796909
LYPD3_O95274_OID21530_v1_Oncology	43	rs35681564	rs10454103	0	0.918505	0	0.00287641	0.0786183
CPE_P16870_OID21392_v1_Oncology	22	rs1550270	rs1550270	2.00E-203	0.919576	4.29E-206	0.00189259	0.0785313
CPXM2_Q8N436_OID30322_v1_Cardiometabolic_II	56	rs28661325	rs28661325	0	0.918166	0	0.00439173	0.0774421
NPTXR_O95502_OID20191_v1_Cardiometabolic	20	rs117773903	rs117773903	0	0.922242	0	0.00121623	0.0765415
THSD1_Q9NS62_OID30476_v1_Inflammation_II	7	rs9526898	rs9526898	4.73E-21	0.924485	2.95E-24	0.000500717	0.0750146
ANKMY2_Q8IV38_OID30518_v1_Inflammation_II	3	rs4719474	rs4719474	3.73E-18	0.925148	8.62E-22	0.0001389	0.0747135
CD36_P16671_OID30485_v1_Inflammation_II	20	rs6961069	rs6961069	1.65E-271	0.925224	3.62E-274	0.00195952	0.0728161
ARSA_P15289_OID21138_v1_Neurology	44	rs77135372	rs77135372	0	0.925033	0	0.00257849	0.0723887
LBP_P18428_OID20355_v1_Cardiometabolic	53	rs45589832	rs45589832	0	0.924427	0	0.00382651	0.0717466
CEACAM19_Q7Z692_OID31443_v1_Oncology_II	20	rs62119322	rs62119322	3.55E-166	0.926681	6.67E-169	0.00166934	0.0716493
RGMA_Q96B86_OID21065_v1_Neurology	35	rs3752102	rs3752102	7.45E-208	0.9267	1.94E-210	0.00234706	0.0709534
CHCHD6_Q9BRQ6_OID31426_v1_Oncology_II	16	rs9863101	rs9863101	2.87E-201	0.928	3.97E-204	0.00120974	0.0707905
RBP7_Q96R05_OID31526_v1_Oncology_II	23	rs1220399	rs1220399	3.32E-254	0.927871	5.90E-257	0.00157996	0.0705488
ASGR2_P07307_OID30679_v1_Inflammation_II	28	rs2304980	rs2304980	0	0.928612	0	0.00234644	0.0690415
PROS1_P07225_OID30737_v1_Inflammation_II	7	rs9826711	rs9826711	4.94E-21	0.93034	3.66E-24	0.000620559	0.0690397
CD80_P33681_OID30291_v1_Cardiometabolic_II	36	rs66604554	rs66604554	0	0.92888	0	0.00260998	0.0685103
CPA4_Q9UI42_OID30606_v1_Inflammation_II	56	rs56155312	rs56155312	0	0.927954	0	0.00423057	0.0678151
SEZ6L_Q9BYH1_OID21488_v1_Oncology	23	rs137203	rs137203	1.74E-95	0.930208	4.00E-98	0.00206691	0.0677254
CD46_P15529_OID20380_v1_Cardiometabolic	5	rs1970530	rs1970530	1.10E-24	0.932326	5.72E-28	0.000416355	0.0672575
TACSTD2_P09758_OID21447_v1_Oncology	57	rs77740907	rs338230	0	0.929393	0	0.00355211	0.0670548
PODXL2_Q9NZ53_OID21487_v1_Oncology	15	rs114895876	rs114895876	2.83E-233	0.93212	2.77E-236	0.000844322	0.0670355
GDNF_P39905_OID20861_v1_Neurology	28	rs62360373	rs62360373	1.21E-200	0.931172	2.47E-203	0.00182823	0.0669993
MCEE_Q96PE7_OID31033_v1_Neurology_II	12	rs6716795	rs6716795	5.03E-125	0.932723	4.79E-128	0.000823229	0.0664533
CCL8_P80075_OID21466_v1_Oncology	48	rs4794992	rs80219280	0	0.9303	0	0.00370643	0.0659937
IFI30_P13284_OID31505_v1_Oncology_II	31	rs12052062	rs12052062	0	0.933189	0	0.00251198	0.064299
DCC_P43146_OID30953_v1_Neurology_II	25	rs9807459	rs9807459	1.06E-188	0.934483	1.71E-191	0.00144654	0.0640709
ENO3_P13929_OID30209_v1_Cardiometabolic_II	3	rs2243090	rs2243090	4.50E-26	0.936204	8.13E-30	0.000105552	0.0636904
PDCD6_O75340_OID20163_v1_Cardiometabolic	64	rs56106847	rs373918364	0	0.931921	0	0.00444083	0.0636382
ESYT2_A0FGR8_OID31134_v1_Neurology_II	9	rs2709865	rs2709865	2.80E-66	0.935993	2.27E-69	0.000696051	0.0633105
MST1_P26927_OID30713_v1_Inflammation_II	45	rs188551769	rs138838615	0	0.933535	0	0.00335684	0.0631077
RBKS_Q9H477_OID20986_v1_Neurology	19	rs148469514	rs144742775	8.70E-168	0.934679	3.71E-170	0.00391903	0.0614024
KLK14_Q9P0G3_OID21407_v1_Oncology	36	rs7253169	rs7253169	0	0.936734	0	0.0019858	0.0612804
MZB1_Q8WU39_OID20732_v1_Inflammation	4	rs116498185	rs116498185	6.62E-31	0.938989	2.93E-34	0.000355266	0.0606556
SNAP25_P60880_OID30811_v1_Neurology_II	7	rs362562	rs362562	6.34E-36	0.939099	2.63E-39	0.000329264	0.0605713
BLMH_Q13867_OID20336_v1_Cardiometabolic	52	rs3794809	rs34086083	0	0.934532	0	0.00554972	0.0599185
CCL24_O00175_OID20772_v1_Inflammation	86	rs76233862	rs55879743	0	0.933831	0	0.00644872	0.0597206
TPMT_P51580_OID21270_v1_Oncology	39	rs6908777	rs6908777	0	0.937516	0	0.00327996	0.0592037
NELL2_Q99435_OID20706_v1_Inflammation	20	rs382115	rs382115	1.56E-114	0.940469	2.26E-117	0.00130269	0.0582282
ENDOU_P21128_OID31498_v1_Oncology_II	33	rs11168167	rs11168167	0	0.941143	0	0.00200076	0.056856
PRDX5_P30044_OID20644_v1_Inflammation	7	rs28395878	rs28395878	2.44E-17	0.943881	2.26E-20	0.000819152	0.0553002
CPA2_P48052_OID21060_v1_Neurology	48	rs149137066	rs3757402	0	0.937613	0	0.00722195	0.0551648
KLK6_Q92876_OID21526_v1_Oncology	6	rs268891	rs268891	3.01E-124	0.945768	1.30E-127	0.000355103	0.0538768
INHBC_P55103_OID21093_v1_Neurology	73	rs7975818	rs112193976	0	0.94198	0	0.00439909	0.0536212
TNFSF12_O43508_OID20624_v1_Inflammation	34	rs6503037	rs6503037	0	0.943481	0	0.00311657	0.0534026
KYNU_Q16719_OID20669_v1_Inflammation	19	rs78189771	rs78189771	3.21E-234	0.945768	6.76E-237	0.00193583	0.0522957
TFPI_P10646_OID20388_v1_Cardiometabolic	40	rs13427277	rs13427277	0	0.944888	0	0.00293388	0.0521785
PAM_P19021_OID20291_v1_Cardiometabolic	61	rs79183600	rs79183600	0	0.943917	0	0.00392014	0.052163
LGALS3_P17931_OID20284_v1_Cardiometabolic	72	rs7144602	rs117314452	0	0.942382	0	0.00571702	0.0519011
AREG_P15514_OID21357_v1_Oncology	15	rs1691273	rs1691273	8.76E-98	0.946787	1.35E-100	0.00140537	0.0518073
ODAM_A1E959_OID20793_v1_Neurology	27	rs76153614	rs76153614	9.01E-240	0.947601	1.72E-242	0.00175633	0.050643
QDPR_P09417_OID20174_v1_Cardiometabolic	30	rs3822233	rs3822233	0	0.947203	0	0.00222513	0.0505716
ANGPT2_O15123_OID21463_v1_Oncology	16	rs1968586	rs1968586	9.37E-83	0.948188	1.43E-85	0.00139376	0.0504185
PBLD_P30039_OID20839_v1_Neurology	47	rs74769472	rs74769472	0	0.946819	0	0.00277082	0.0504102
PCBD1_P61457_OID30610_v1_Inflammation_II	14	rs2630336	rs2630336	4.67E-114	0.94877	7.56E-117	0.00148678	0.0497432
ACTA2_P62736_OID20079_v1_Cardiometabolic	3	rs1324551	rs1324551	2.55E-12	0.950548	4.53E-16	0.000119635	0.0493327
CD276_Q5ZPR3_OID20680_v1_Inflammation	63	rs8025183	rs2415151	0	0.945008	0	0.00581115	0.049181
PINLYP_A6NC86_OID30651_v1_Inflammation_II	72	rs2355728	rs8113762	0	0.943023	0	0.00794649	0.0490308
RASSF2_P50749_OID21194_v1_Oncology	7	rs2246735	rs2246735	2.86E-29	0.950624	2.58E-32	0.000806015	0.0485702
MDGA1_Q8NFP4_OID20951_v1_Neurology	129	rs804830	rs876796	0	0.934349	0	0.0180088	0.0476424
DPP10_Q8N608_OID20527_v1_Inflammation	41	rs17355498	rs17355498	1.31E-260	0.945383	1.00E-262	0.0071668	0.0474506
C4BPB_P20851_OID21481_v1_Oncology	18	rs3813948	rs3813948	2.90E-97	0.952115	3.08E-100	0.000966136	0.046919
MPI_P34949_OID21288_v1_Oncology	23	rs4886632	rs4886632	7.98E-145	0.951904	1.42E-147	0.00164883	0.0464467
FOLR3_P41439_OID21485_v1_Oncology	65	rs149202879	rs652197	0	0.948994	0	0.00463076	0.0463754
CD2AP_Q9Y5K6_OID20177_v1_Cardiometabolic	27	rs1385742	rs1385742	2.24E-292	0.952044	4.19E-295	0.00173422	0.0462219
HCLS1_P14317_OID20648_v1_Inflammation	4	rs3732410	rs3732410	2.65E-20	0.955179	6.61E-24	0.000194044	0.0446271
ENPP5_Q9UJA9_OID20736_v1_Inflammation	105	rs6906620	rs62400504	0	0.945635	0	0.00975099	0.0446145
MMP1_P03956_OID20672_v1_Inflammation	97	rs1144393	rs1144393	0	0.948242	0	0.00716326	0.0445951
MARCO_Q9UEW3_OID20210_v1_Cardiometabolic	22	rs35288880	rs35288880	3.07E-247	0.953855	7.26E-250	0.00220743	0.0439373
CD164L2_Q6UWJ8_OID30922_v1_Neurology_II	26	rs74061779	rs74061779	0	0.953911	0	0.00248416	0.043605
ITGAV_P06756_OID21416_v1_Oncology	13	rs2595391	rs2595391	5.97E-81	0.955777	6.25E-84	0.000956765	0.0432664
ADAM12_O43184_OID30491_v1_Inflammation_II	20	rs11244909	rs11244909	5.23E-55	0.956018	4.71E-58	0.000818639	0.0431635
CHL1_O00533_OID20366_v1_Cardiometabolic	58	rs13077895	rs6773584	0	0.95385	0	0.00317102	0.0429794
BTC_P35070_OID21199_v1_Oncology	40	rs28458910	rs28458910	0	0.953765	0	0.00363508	0.0425997
CLEC6A_Q6EIG7_OID21228_v1_Oncology	46	rs61920530	rs111770114	0	0.953716	0	0.00392042	0.0423631
LRG1_P02750_OID30751_v1_Inflammation_II	50	rs80153912	rs4807603	0	0.954173	0	0.00393255	0.0418943
FSTL1_Q12841_OID30254_v1_Cardiometabolic_II	9	rs1147707	rs1147707	5.30E-73	0.957572	4.92E-76	0.000847565	0.0415809
SERPINA9_Q86WD7_OID21284_v1_Oncology	68	rs17825157	rs1951023	0	0.953452	0	0.00514419	0.0414034
LEFTY2_O00292_OID21454_v1_Oncology	85	rs2740168	rs2740168	0	0.951592	0	0.00709157	0.0413164
SPINK1_P00995_OID21097_v1_Neurology	57	rs2082391	rs2082391	0	0.953673	0	0.00571645	0.040611
TNFRSF10C_O14798_OID20265_v1_Cardiometabolic	23	rs7009522	rs7009522	0	0.957787	0	0.00170977	0.0405032
CLEC1A_Q8NC01_OID20099_v1_Cardiometabolic	29	rs7961483	rs7961483	0	0.955646	0	0.00400933	0.0403442
ICAM5_Q9UMF0_OID20145_v1_Cardiometabolic	83	rs5030347	rs7258215	0	0.949687	0	0.0103264	0.0399867
FSTL3_O95633_OID20782_v1_Inflammation	9	rs916904	rs916904	6.82E-24	0.959707	4.40E-27	0.000579916	0.0397134
IL10RB_Q08334_OID20696_v1_Inflammation	61	rs8178484	rs8178484	0	0.956092	0	0.00466935	0.0392384
CLEC4C_Q8WTT0_OID20547_v1_Inflammation	92	rs75808010	rs138082772	0	0.953805	0	0.00699568	0.0391994
IL1RL1_Q01638_OID20250_v1_Cardiometabolic	80	rs2310187	rs72627435	0	0.95496	0	0.00587024	0.0391695
ANXA2_P07355_OID30263_v1_Cardiometabolic_II	53	rs67827628	rs67827628	0	0.952926	0	0.00813695	0.0389374
PIK3AP1_Q6ZUJ8_OID20587_v1_Inflammation	21	rs41317268	rs41317268	1.08E-128	0.959631	1.69E-131	0.00146795	0.0389011
PSAPL1_Q6NUJ1_OID31473_v1_Oncology_II	49	rs74491793	rs35791045	0	0.957335	0	0.00418301	0.0384815
SUSD5_O60279_OID30650_v1_Inflammation_II	65	rs13084187	rs13085279	0	0.956736	0	0.00483251	0.0384318
PPCDC_Q96CD2_OID21027_v1_Neurology	30	rs11072519	rs11072519	0	0.95835	0	0.00394746	0.0377021
SFTPA1_Q8IWL2_OID21165_v1_Oncology	14	rs1965708	rs1965708	8.86E-174	0.961239	1.03E-176	0.00107887	0.0376825
AHSG_P02765_OID30706_v1_Inflammation_II	75	rs4686784	rs9870756	0	0.957849	0	0.00530039	0.0368502
IL22_Q9GZX6_OID31407_v1_Oncology_II	6	rs6581807	rs6581807	5.59E-31	0.96281	2.36E-34	0.000370656	0.0368196
VSIG10_Q8N0Z9_OID31400_v1_Oncology_II	68	rs8239	rs8239	0	0.957267	0	0.00618025	0.0365531
HRG_P04196_OID30770_v1_Inflammation_II	46	rs66965282	rs66965282	0	0.960194	0	0.00330835	0.036498
GGT1_P19440_OID21075_v1_Neurology	29	rs28509371	rs28509371	7.53E-256	0.961682	1.81E-258	0.00227074	0.0360475
SPINK8_P0C7L1_OID30153_v1_Cardiometabolic_II	29	rs7374376	rs7374376	0	0.962272	0	0.00190185	0.0358265
LRIG1_Q96JA1_OID21429_v1_Oncology	87	rs142620026	rs1678101	0	0.957987	0	0.00629485	0.035718
GSTA3_Q16772_OID21242_v1_Oncology	20	rs2749005	rs372848571	1.57E-67	0.962597	2.83E-70	0.0016987	0.0357046
CDCP1_Q9H5V8_OID20940_v1_Neurology	40	rs2276862	rs2276862	7.02E-258	0.961766	2.25E-260	0.00304085	0.0351929
B4GAT1_O43505_OID21127_v1_Neurology	29	rs10896113	rs10896113	2.91E-279	0.962299	7.74E-282	0.00252245	0.0351786
SOD2_P04179_OID21114_v1_Neurology	15	rs5746105	rs5746105	1.78E-80	0.964169	1.69E-83	0.000882771	0.0349484
APRT_P07741_OID20927_v1_Neurology	4	rs12596224	rs12596224	1.71E-10	0.965443	6.43E-14	0.00032855	0.0342288
CFH_P08603_OID30790_v1_Inflammation_II	37	rs2019727	rs2019727	0	0.963493	0	0.002719	0.033788
TNC_P24821_OID20359_v1_Cardiometabolic	36	rs7021057	rs7021057	1.26E-205	0.964036	3.25E-208	0.0024431	0.033521
BTN3A2_P78410_OID20540_v1_Inflammation	58	rs116418977	rs67575965	0	0.961568	0	0.0050902	0.0333419
LY75_O60449_OID20580_v1_Inflammation	115	rs72947569	rs12052715	0	0.957956	0	0.00878325	0.0332608
SDK2_Q58EX2_OID30662_v1_Inflammation_II	48	rs8075940	rs8075940	0	0.963025	0	0.00461436	0.0323604
NRP2_O60462_OID21081_v1_Neurology	28	rs2289023	rs2289023	1.39E-113	0.965453	3.69E-116	0.00252707	0.0320199
KLB_Q86Z14_OID20888_v1_Neurology	93	rs142803549	rs2608817	0	0.96137	0	0.00708903	0.0315414
F12_P00748_OID30739_v1_Inflammation_II	123	rs1966265	rs4976648	0	0.95999	0	0.0089106	0.0310991
WFIKKN2_Q8TEU8_OID20785_v1_Inflammation	68	rs80200503	rs11871108	0	0.9635	0	0.00552938	0.0309706
IL12B_P29460_OID20666_v1_Inflammation	59	rs4321737	rs4921483	0	0.958034	0	0.0110824	0.0308835
PSG1_P11464_OID20916_v1_Neurology	104	rs8105354	rs12986075	0	0.96099	0	0.0083478	0.0306623
TNFSF13_O75888_OID20733_v1_Inflammation	28	rs3803800	rs3803800	4.33E-299	0.966757	1.26E-301	0.00277021	0.0304726
ECI2_O75521_OID30142_v1_Cardiometabolic_II	20	rs660560	rs660560	2.22E-241	0.967988	4.17E-244	0.00178524	0.0302272
GGH_Q92820_OID20416_v1_Cardiometabolic	56	rs77291996	rs7836669	0	0.965888	0	0.00408937	0.0300224
LPA_P08519_OID30747_v1_Inflammation_II	115	rs2292334	rs56393506	0	0.959409	0	0.0111313	0.0294598
PTPRM_P28827_OID20598_v1_Inflammation	8	rs72911294	rs72911294	1.68E-18	0.969782	1.52E-21	0.000850937	0.0293668
IL31RA_Q8NI17_OID30475_v1_Inflammation_II	73	rs34790125	rs13183319	0	0.966025	0	0.0046848	0.0292906
FUT8_Q9BYC5_OID20992_v1_Neurology	87	rs111465795	rs1256518	0	0.962027	0	0.00906757	0.0289058
MLN_P12872_OID20541_v1_Inflammation	75	rs2296329	rs4713685	0	0.964968	0	0.00648598	0.0285458
MOCS2_O96007_OID30638_v1_Inflammation_II	56	rs67835512	rs77816287	0	0.966281	0	0.00531124	0.0284073
FAM20A_Q96MK3_OID30348_v1_Cardiometabolic_II	41	rs2952271	rs2952271	6.23E-207	0.968914	2.31E-209	0.00356906	0.0275165
TPSAB1_Q15661_OID20642_v1_Inflammation	117	rs34777355	rs12051002	0	0.964427	0	0.00813514	0.0274379
CNTN1_Q12860_OID20307_v1_Cardiometabolic	52	rs11177604	rs11177604	1.04E-167	0.969177	3.79E-170	0.00349553	0.0273277
NUCB2_P80303_OID21448_v1_Oncology	44	rs7937770	rs7937770	0	0.968457	0	0.00437197	0.0271706
RTN4R_Q9BZR6_OID21424_v1_Oncology	50	rs663353	rs663353	1.58E-258	0.967322	9.03E-261	0.00551978	0.0271583
ACY3_Q96HD9_OID30086_v1_Cardiometabolic_II	38	rs3758938	rs3758938	2.26E-240	0.969181	9.23E-243	0.00392694	0.0268922
GBP4_Q96PP9_OID20845_v1_Neurology	89	rs72726528	rs2149610	0	0.966722	0	0.00647297	0.0268052
IL1RN_P18510_OID20700_v1_Inflammation	27	rs55709272	rs55709272	3.19E-166	0.971317	7.74E-169	0.00233347	0.026349
BPIFB2_Q8N4F0_OID30311_v1_Cardiometabolic_II	46	rs2377736	rs2377736	6.03E-265	0.964817	5.61E-267	0.00894781	0.0262355
LAYN_Q6UX15_OID20970_v1_Neurology	35	rs611607	rs611607	0	0.970957	0	0.00322649	0.0258164
SPARCL1_Q14515_OID20361_v1_Cardiometabolic	78	rs62319116	rs4610302	0	0.967387	0	0.00704244	0.0255707
IL12RB1_P42701_OID20486_v1_Inflammation	37	rs3746190	rs2644777	0	0.972431	0	0.00227292	0.0252957
DPEP1_P16444_OID20897_v1_Neurology	117	rs112264279	rs460105	0	0.965672	0	0.00929404	0.0250336
FCRL1_Q96LA6_OID20172_v1_Cardiometabolic	49	rs2317230	rs2317230	1.42419363070198e-319	0.97159	5.97819431467908e-322	0.00404443	0.0243659
SERPINA5_P05154_OID30763_v1_Inflammation_II	30	rs1130267	rs1130267	5.17E-146	0.974332	1.09E-148	0.00203254	0.0236352
LRRC25_Q8N386_OID21333_v1_Oncology	36	rs3859570	rs3859570	0	0.973576	0	0.00280799	0.0236161
RNF149_Q8NC42_OID30235_v1_Cardiometabolic_II	24	rs12621632	rs12621632	6.35E-290	0.974738	1.14E-292	0.00172839	0.0235333
